# Supplementary material for: Anodic dearomatization of 2-alkynylanilines for the synthesis of multi-functionalized indoles
Source: Royal Society of Chemistry journal article supplement (doi:10.1039/d2cc01766k), 2022-01-01

# Supplementary Information

## Anodic Dearomatization of 2-Alkynylanilines for the Synthesis of Multi-functionalized Indoles

Zhuowen Chen,<sup>a</sup> Qiuqin He,<sup>b</sup> Hao Guo<sup>\*ab</sup> and Renhua Fan<sup>\*b</sup>

---

<sup>a</sup>Academy for Engineering and Technology, Fudan University, 220 Handan Road, Shanghai 200433, China.

<sup>b</sup>Department of Chemistry, Fudan University, 2005 Songhu Road, Shanghai 200438, China.

### Supplementary Data

#### List of Contents

#### Contents:

|                                                  |   |
|--------------------------------------------------|---|
| 1. General Information.....                      | 1 |
| 2. Optimization of the Reaction Conditions ..... | 2 |
| 3. Experimental Procedures.....                  | 3 |
| 4. Crystal details of compound 3c .....          | 6 |
| 5. Characterization of Products.....             | 8 |

## 1. General Information

All reactions were performed in Schlenk tubes. Flash column chromatography was performed using silica gel (60-A pore size, 32–63  $\mu\text{m}$ , standard grade). Analytical thin-layer chromatography was performed using glass plates pre-coated with 0.25 mm 230–400 mesh silica gel impregnated with a fluorescent indicator (254 nm). Thin layer chromatography plates were visualized by exposure to ultraviolet light. Organic solutions were concentrated on rotary evaporators at ~20 Torr (house vacuum) at 25–35  $^{\circ}\text{C}$ . Commercial reagents and solvents were used as received. Nuclear magnetic resonance (NMR) spectra are recorded in parts per million from internal tetramethylsilane on the  $\delta$  scale.

## 2. Optimization of the Reaction Conditions

Table 1 Reaction Optimization with Substrate **1c**

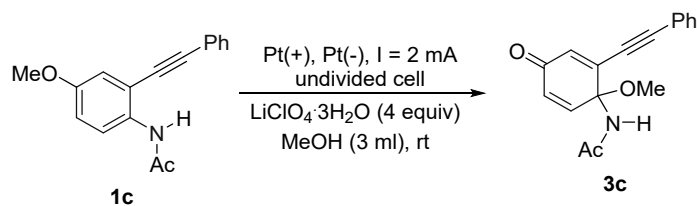

| entry    | variation from standard conditions <sup>a</sup>                           | <b>3c</b> yield <sup>b</sup> (%) |
|----------|---------------------------------------------------------------------------|----------------------------------|
| <b>1</b> | <b>none</b>                                                               | <b>98</b>                        |
| 2        | <i>n</i> -Bu <sub>4</sub> NClO <sub>4</sub> instead of LiClO <sub>4</sub> | 75                               |
| 3        | <i>n</i> -Bu <sub>4</sub> NBF <sub>4</sub> instead of LiClO <sub>4</sub>  | 63                               |
| 4        | LiCl instead of LiClO <sub>4</sub>                                        | 48                               |
| 5        | RVC (+) instead of Pt (+)                                                 | 43                               |
| 6        | 1.5 mA instead of 2.0 mA                                                  | 62                               |
| 7        | 3 mA instead of 2.0 mA                                                    | 78                               |
| 8        | no electric current                                                       | 0                                |
| 9        | at 0 °C                                                                   | 73                               |
| 10       | at 50 °C                                                                  | 81                               |
| 11       | gram scale                                                                | 96                               |

<sup>a</sup>Standard conditions: **1c** (0.1 mmol), LiClO<sub>4</sub>·3H<sub>2</sub>O (4.0 equiv.), and MeOH (3 mL), in an undivided cell with two platinum plate electrodes (each 1.0 × 1.0 cm<sup>2</sup>), constant current = 2 mA, room temperature, 3.5 h. <sup>b</sup>Isolated yield.

### 3. Experimental Procedures

#### Representative Procedure

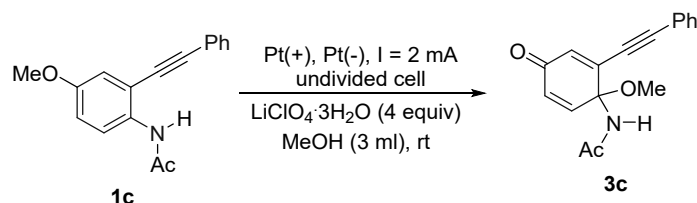

The electrolysis was carried out in an undivided cell equipped with two platinum electrodes ( $1.0 \times 1.0 \text{ cm}^2$ ). A mixture of *N*-(4-methoxy-2-(phenylethynyl)phenyl)acetamide **1c** (26 mg, 0.1 mmol, 1.0 equiv),  $\text{LiClO}_4 \cdot 3\text{H}_2\text{O}$  (64 mg, 0.4 mmol, 4.0 equiv) and MeOH (3 mL) were added to the electrochemical cell. Electrolysis was started at  $25^\circ\text{C}$  with a constant current of 2 mA maintained for 3.5 h. After the material was consumed completely (monitored by TLC analysis), the reaction mixture was washed with water, dried over  $\text{Na}_2\text{SO}_4$ , filtered and concentrated in vacuo. The residue was purified by flash column chromatography on silica gel (eluent: petroleum ether/ethyl acetate = 1/2) to furnish the desired compound **3c**.

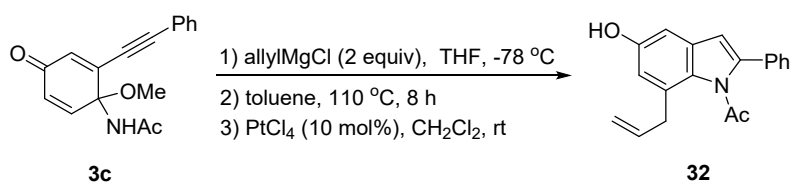

A stirred solution of *N*-(1-methoxy-4-oxo-2-(phenylethynyl)cyclohexa-2,5-dien-1-yl)acetamide **3c** (14 mg, 0.05 mmol, 1.0 equiv) in dry THF (1 mL) was cooled to  $-78^\circ\text{C}$  under nitrogen atmosphere. AllylMgCl (0.05 mL, 2 mol/L in THF, 2.0 equiv) was added dropwise to this solution. After stirring at  $-78^\circ\text{C}$  for 1 h, the reaction was allowed to warm to room temperature and quenched with MeOH. The reaction mixture was passed through a short silica gel column to remove Magnesium salt with DCM as flushing agent and then concentrated in vacuo. The residue was dissolved in toluene (1 mL) and stirred at  $110^\circ\text{C}$  for 8 h. The mixture was concentrated in vacuo and mixed with  $\text{PtCl}_4$  (2 mg, 0.005 mmol, 0.1 equiv) in DCM (1.0 mL) at  $25^\circ\text{C}$  for 8 h. After the intermediate was consumed completely (monitored by TLC analysis), the mixture was concentrated in vacuo. The residue was purified by flash column chromatography on silica gel (eluent: petroleum ether/ethyl acetate = 2/1) to furnish the desired compound **32**.

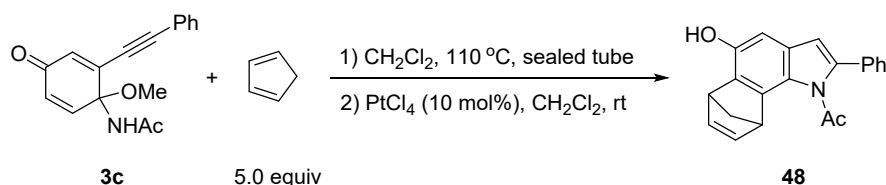

*N*-(1-methoxy-4-oxo-2-(phenylethynyl)cyclohexa-2,5-dien-1-yl)acetamide **3c** (9 mg, 0.03 mmol, 1.0 equiv) was dissolved in DCM (1 mL) in a sealed tube. Cyclopentadiene (10 mg, 0.15 mmol, 5.0 equiv) was added to this solution. After stirring at  $110^\circ\text{C}$  for 24 h, the reaction mixture was cooled down to the room temperature and mixed with  $\text{PtCl}_4$  (1 mg, 0.003 mmol, 0.1 equiv) for 8 h. After the intermediate was consumed completely (monitored by TLC analysis), the mixture was concentrated in vacuo. The residue

was purified by flash column chromatography on silica gel (eluent: petroleum ether/ethyl acetate = 2/1) to furnish the desired compound **48**.

### The procedure for synthesis of a series of starting material

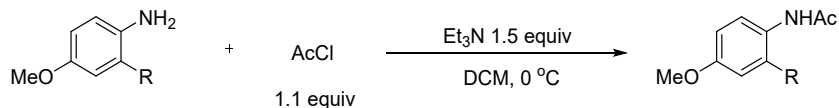

To a stirred solution of arylamine (1.0 equiv) in DCM (10 mL) was added AcCl (1.1 equiv) and Et<sub>3</sub>N (1.5 equiv). The resulted mixture was stirred at 0 °C for 4 h. Then the reaction was quenched by saturated NH<sub>4</sub>Cl solution and the reaction mixture was extracted with CH<sub>2</sub>Cl<sub>2</sub> (3 x 5 mL). The combined organic layer was dried over anhydrous Na<sub>2</sub>SO<sub>4</sub> and concentrated. The residue was purified by flash column chromatography on silica gel (eluent: petroleum ether/ethyl acetate = 2/1) to furnish the desired compound.

### The procedure<sup>1</sup> for synthesis of compound **61**

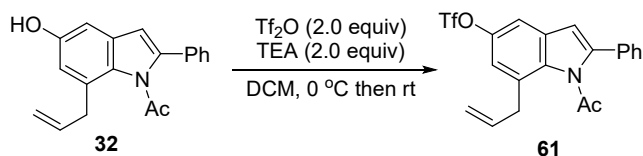

A stirred solution of 1-(7-allyl-5-hydroxy-2-phenyl-1*H*-indol-1-yl)ethan-1-one **32** (29 mg, 0.1 mmol, 1.0 equiv) in DCM (1 mL) cooled to 0 °C. Et<sub>3</sub>N (20 mg, 0.2 mmol, 2 equiv) was added dropwise to this solution followed by Tf<sub>2</sub>O (57 mg, 0.2 mmol, 2 equiv). After stirring at 0 °C for 10 min, the reaction was allowed to warm to room temperature and stirred for 2 h, quenched with saturated aqueous NaHCO<sub>3</sub> solution, and extracted by ethyl acetate (10 mL x 3). The combined organic layers were washed with brine, dried over Na<sub>2</sub>SO<sub>4</sub>, filtered and concentrated in vacuo. The residue was purified by flash column chromatography on silica gel (eluent: petroleum ether/ethyl acetate = 10/1) to furnish the desired compound **61** (94%).

### The procedure<sup>2</sup> for synthesis of compound **62**

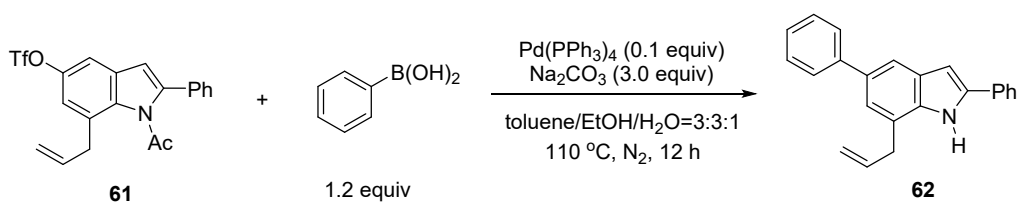

1-acetyl-7-allyl-2-phenyl-1*H*-indol-5-yl trifluoromethanesulfonate **61** (21 mg, 0.05 mmol, 1.0 equiv), phenylboronic acid (7 mg, 0.06 mmol, 1.2 equiv), tetrakis(triphenylphosphine)palladium (6 mg, 0.005 mmol, 0.1equiv), sodium carbonate (16 mg, 0.15 mmol, 3.0 equiv), toluene (0.3 mL), ethanol (0.3 mL) and water (0.1 mL) were mixed under nitrogen atmosphere. After stirring at 110 °C for 12 h the mixture was cooled down to the room temperature and treated with 2 M HCl (1 mL) and water (1 mL). The aqueous phase was extracted with ethyl acetate (10 mL x 3). The combined organic layers were washed with brine, dried over Na<sub>2</sub>SO<sub>4</sub> filtered and concentrated in vacuo. The residue was purified by flash column

chromatography on silica gel (eluent: petroleum ether/ethyl acetate = 10/1) to furnish the desired compound **62** (83%).

### The procedure<sup>3</sup> for synthesis of compound **63**

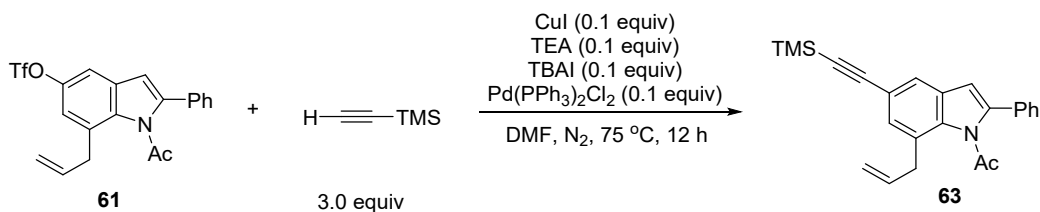

To a stirred solution of 1-acetyl-7-allyl-2-phenyl-1*H*-indol-5-yl trifluoromethanesulfonate **61** (21mg, 0.05 mmol, 1.0 equiv), CuI (1 mg, 0.005 mmol, 0.1 equiv), TBAI (2 mg, 0.005 mmol, 0.1 equiv) and Pd(PPh<sub>3</sub>)Cl<sub>2</sub> (4 mg, 0.005 mmol, 0.1 equiv) in dry DMF (1 mL) were added trimethylsilylacetylene (15 mg, 0.3 mmol, 3.0 equiv) and TEA (1 mg, 0.005 mmol, 0.1 equiv) under nitrogen atmosphere. After stirring for 12 h at 70 °C, the reaction mixture was poured into saturated aqueous NH<sub>4</sub>Cl solution and extracted with ethyl acetate (10 mL × 3). The combined organic layers were washed with water, brine, dried over Na<sub>2</sub>SO<sub>4</sub>, filtered and concentrated in vacuo to give a residue, which was purified by flash column chromatography on silica gel (eluent: petroleum ether/ethyl acetate = 10/1) to furnish the desired compound **63** (79%).

### Supplementary References

1. Y. Wang, Q. Q. He and R. H. Fan, *Org. Chem. Front.*, 2021, **8**, 3004-3007
2. M. Sera, H. Mizufune, T. Ueda, M. Mineno and A. Zanka, *Tetrahedron*, 2017, **73**, 5946-5658.
3. X. M. Zheng and M. A. Kerr, *Org. Lett.*, 2006, **8**, 3777-3779

## 4. Crystal details of compound 3c

Sample preparation: A solution of compound **3c** (0.1 mmol) in a mixed solvent of dichloromethane (1 mL) and petroleum ethe (2 mL) was placed in a vial (10 mL). The single crystal **3c** was obtained by slowly evaporating solvent at room temperature under the air conditions.

Crystal measurement: X-ray crystal structures of **3c** were determined at 173 K by using D8 VENTURE MetalJet microfocal single crystal diffractometer.

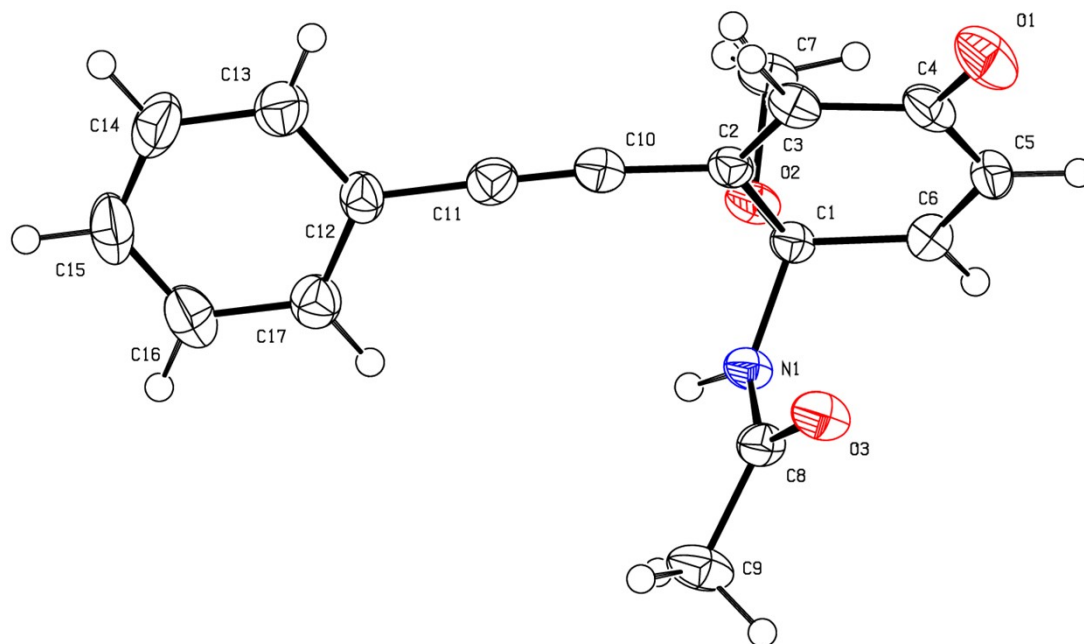

**Figure 1.** ORTEP diagram of compound **3c** (The ellipsoid contour of probability level is 50%)

**Table 2.** Crystal data and structure refinement for compound **3c**

|                      |                                                        |
|----------------------|--------------------------------------------------------|
| Identification code  | 3c                                                     |
| Empirical formula    | C17 H15 N O3                                           |
| Formula weight       | 281.30                                                 |
| Temperature          | 173(2) K                                               |
| Wavelength           | 1.34138 Å                                              |
| Crystal system       | Orthorhombic                                           |
| Space group          | Pca2 <sub>1</sub>                                      |
| Unit cell dimensions | a = 17.0936(9) Å<br>b = 9.1661(5) Å<br>c = 9.2363(5) Å |
| Volume               | 1447.16(13) Å <sup>3</sup>                             |

---

|                                   |                                                   |
|-----------------------------------|---------------------------------------------------|
| Z                                 | 4                                                 |
| Density (calculated)              | 1.291 Mg/m <sup>3</sup>                           |
| Absorption coefficient            | 0.462 mm <sup>-1</sup>                            |
| F(000)                            | 592                                               |
| Crystal size                      | 0.280 x 0.170 x 0.080 mm <sup>3</sup>             |
| Theta range for data collection   | 4.501 to 57.983°.                                 |
| Index ranges                      | -21<=h<=21, -11<=k<=11, -11<=l<=11                |
| Reflections collected             | 24217                                             |
| Independent reflections           | 3063 [R(int) = 0.0568]                            |
| Completeness to theta = 53.594°   | 99.9 %                                            |
| Absorption correction             | Semi-empirical from equivalents                   |
| Max. and min. transmission        | 0.751 and 0.633                                   |
| Refinement method                 | Full-matrix least-squares on F <sup>2</sup>       |
| Data / restraints / parameters    | 3063 / 1 / 195                                    |
| Goodness-of-fit on F <sup>2</sup> | 1.050                                             |
| Final R indices [I>2sigma(I)]     | R <sup>1</sup> = 0.0308, wR <sup>2</sup> = 0.0776 |
| R indices (all data)              | R <sup>1</sup> = 0.0325, wR <sup>2</sup> = 0.0794 |
| Absolute structure parameter      | -0.07(11)                                         |
| Extinction coefficient            | n/a                                               |
| Largest diff. peak and hole       | 0.191 and -0.153 e.Å <sup>-3</sup>                |

---



## 5. Characterization of Products

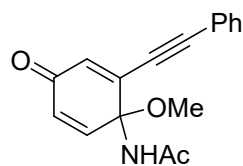

**3c**

*N*-(1-methoxy-4-oxo-2-(phenylethynyl)cyclohexa-2,5-dien-1-yl)acetamide **3c**: 27.5 mg, 98% yield. Yellow solid, mp:182-183 °C. <sup>1</sup>H NMR (400 MHz, Chloroform-*d*) δ 7.53-7.51 (m, 2H), 7.42-7.36 (m, 3H), 6.89 (d, *J* = 10.3 Hz, 1H), 6.66 (d, *J* = 1.9 Hz, 1H), 6.45 (dd, *J* = 10.3, 1.9 Hz, 1H), 6.41 (s, 1H), 3.24 (s, 3H), 2.03 (s, 3H); <sup>13</sup>C NMR (101 MHz, CDCl<sub>3</sub>) δ 184.6, 168.9, 144.5, 138.9, 134.6, 132.1, 131.0, 129.9, 128.6, 121.5, 100.9, 84.1, 80.5, 51.0, 23.6; HRMS (*m/z*): [M+H]<sup>+</sup> calcd. for C<sub>17</sub>H<sub>16</sub>NO<sub>3</sub>, 282.1125; found, 282.1125.

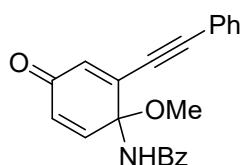

**3d**

*N*-(1-methoxy-4-oxo-2-(phenylethynyl)cyclohexa-2,5-dien-1-yl)benzamide **3d**: 10.8 mg, 21% yield. White solid, mp:191-192 °C. <sup>1</sup>H NMR (400 MHz, Chloroform-*d*) δ 7.81 (d, *J* = 7.6 Hz, 2H), 7.52-7.50 (m, 1H), 7.45-7.43 (m, 4H), 7.37-7.36 (m, 1H), 7.33 (d, *J* = 7.5 Hz, 2H), 6.95 (d, *J* = 10.3 Hz, 1H), 6.91 (s, 1H), 6.72 (d, *J* = 1.7 Hz, 1H), 6.52 (dd, *J* = 10.2, 1.7 Hz, 1H), 3.31 (s, 3H); <sup>13</sup>C NMR (101 MHz, CDCl<sub>3</sub>) δ 184.6, 165.8, 144.4, 138.9, 134.7, 133.5, 132.2, 132.1, 131.3, 129.8, 128.8, 128.6, 127.1, 121.5, 101.1, 84.1, 81.1, 51.1; HRMS (*m/z*): [M+H]<sup>+</sup> calcd. for C<sub>22</sub>H<sub>18</sub>NO<sub>3</sub>, 344.1281; found, 344.1284.

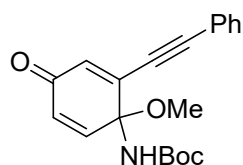

**3e**

*tert*-butyl (1-methoxy-4-oxo-2-(phenylethynyl)cyclohexa-2,5-dien-1-yl)carbamate **3e**: 12.1 mg, 24% yield. White solid, mp:164-165 °C. <sup>1</sup>H NMR (400 MHz, Chloroform-*d*) δ 7.56-7.54 (m, 2H), 7.41-7.38 (m, 3H), 7.09-7.08 (m, 1H), 6.62 (d, *J* = 2.0 Hz, 1H), 6.42 (dd, *J* = 10.3, 2.0 Hz, 1H), 5.44 (s, 1H), 3.24 (s, 3H), 1.42 (s, 9H); <sup>13</sup>C NMR (101 MHz, CDCl<sub>3</sub>) δ 184.6, 153.0, 144.9, 134.0, 132.2, 130.4, 129.9, 128.6, 121.5, 101.4, 84.0, 81.1, 80.2, 51.3, 28.2; HRMS (*m/z*): [M+H]<sup>+</sup> calcd. for C<sub>20</sub>H<sub>22</sub>NO<sub>4</sub>, 340.1543; found, 340.1539.

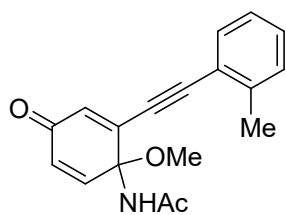

4

***N*-(1-methoxy-4-oxo-2-(*o*-tolylethynyl)cyclohexa-2,5-dien-1-yl)acetamide 4:** 26.8 mg, 88% yield. Yellow solid, mp:132-133 °C. <sup>1</sup>H NMR (400 MHz, Chloroform-*d*) δ 7.48 (d, *J* = 7.5 Hz, 1H), 7.31 (t, *J* = 7.3 Hz, 1H), 7.25 (d, *J* = 7.4 Hz, 1H), 7.20 (t, *J* = 7.4 Hz, 1H), 6.89 (d, *J* = 10.3 Hz, 1H), 6.65 (d, *J* = 1.7 Hz, 1H), 6.44 (dd, *J* = 10.3, 1.7 Hz, 1H), 6.40 (s, 1H), 3.25 (s, 3H), 2.48 (s, 3H), 2.01 (s, 3H); <sup>13</sup>C NMR (101 MHz, CDCl<sub>3</sub>) δ 184.6, 168.7, 144.5, 140.9, 139.1, 134.2, 132.4, 131.0, 130.0, 129.8, 125.9, 121.4, 100.1, 88.0, 80.6, 51.0, 23.6, 20.7; HRMS (*m/z*): [M+H]<sup>+</sup> calcd. for C<sub>18</sub>H<sub>18</sub>NO<sub>3</sub>, 296.1281; found, 296.1282.

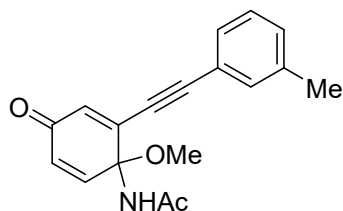

5

***N*-(1-methoxy-4-oxo-2-(*m*-tolylethynyl)cyclohexa-2,5-dien-1-yl)acetamide 5:** 25.4 mg, 87% yield. Yellow solid, mp:134-135 °C. <sup>1</sup>H NMR (400 MHz, Chloroform-*d*) δ 7.33-7.31 (m, 2H), 7.26 (t, *J* = 7.5 Hz, 1H), 7.21 (d, *J* = 7.5 Hz, 1H), 6.88 (d, *J* = 10.3 Hz, 1H), 6.64 (d, *J* = 1.9 Hz, 1H), 6.57 (s, 1H), 6.43 (dd, *J* = 10.3, 1.9 Hz, 1H), 3.23 (s, 3H), 2.35 (s, 3H), 2.02 (s, 3H); <sup>13</sup>C NMR (101 MHz, CDCl<sub>3</sub>) δ 184.7, 169.0, 144.7, 139.2, 138.4, 134.4, 132.6, 130.9, 130.8, 129.3, 128.5, 121.4, 101.3, 83.8, 80.6, 51.0, 23.6, 21.2; HRMS (*m/z*): [M+H]<sup>+</sup> calcd. for C<sub>18</sub>H<sub>18</sub>NO<sub>3</sub>, 296.1281; found, 295.1279.

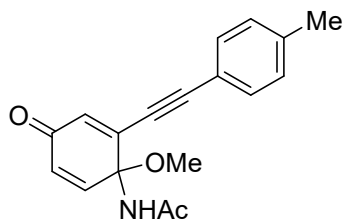

6

***N*-(1-methoxy-4-oxo-2-(*p*-tolylethynyl)cyclohexa-2,5-dien-1-yl)acetamide 6:** 27.1 mg, 91% yield. Yellow solid, mp:148-149 °C. <sup>1</sup>H NMR (400 MHz, Chloroform-*d*) δ 7.41 (d, *J* = 7.9 Hz, 2H), 7.18 (d, *J* = 7.9 Hz, 2H), 6.89 (d, *J* = 10.3 Hz, 1H), 6.63 (d, *J* = 2.1 Hz, 1H), 6.52 (s, 1H), 6.43 (dd, *J* = 10.3, 2.1 Hz, 1H), 3.23 (s, 3H), 2.38 (s, 3H), 2.02 (s, 3H); <sup>13</sup>C NMR (101 MHz, CDCl<sub>3</sub>) δ 184.7, 169.0, 144.6, 140.4, 139.2, 134.2, 132.1, 130.9, 129.4, 118.5, 101.5, 83.7, 80.5, 51.0, 23.6, 21.7; HRMS (*m/z*): [M+H]<sup>+</sup> calcd. for C<sub>18</sub>H<sub>18</sub>NO<sub>3</sub>, 296.1281; found, 295.1277.

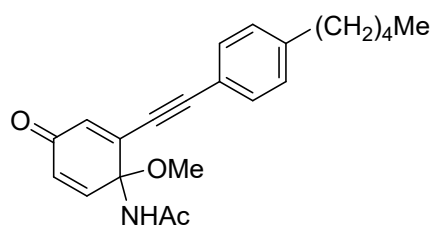

7

***N*-(1-methoxy-4-oxo-2-((4-pentylphenyl)ethynyl)cyclohexa-2,5-dien-1-yl)acetamide 7:** 32.4 mg, 92% yield. Yellow solid, mp:170-171 °C. <sup>1</sup>H NMR (400 MHz, Chloroform-*d*) δ 7.43 (d, *J* = 8.2 Hz, 2H), 7.19 (d, *J* = 8.1 Hz, 2H), 6.92 (d, *J* = 10.3 Hz, 1H), 6.64 (d, *J* = 2.1 Hz, 1H), 6.44 (dd, *J* = 10.3, 2.1 Hz, 1H), 6.37 (s, 1H), 3.24 (s, 3H), 2.62 (t, *J* = 7.7 Hz, 2H), 2.02 (s, 3H), 1.61 (p, *J* = 7.6 Hz, 2H), 1.35-1.29 (m, 4H), 0.89 (t, *J* = 6.8 Hz, 3H). <sup>13</sup>C NMR (101 MHz, CDCl<sub>3</sub>) δ 184.6, 168.8, 145.5, 144.4, 139.1, 134.2, 132.1, 130.9, 128.8, 118.7, 101.6, 83.7, 80.5, 51.0, 36.0, 31.4, 30.8, 23.7, 22.5, 14.0; HRMS (*m/z*): [M+H]<sup>+</sup> calcd. for C<sub>22</sub>H<sub>26</sub>NO<sub>3</sub>, 352.1907; found, 352.1907.

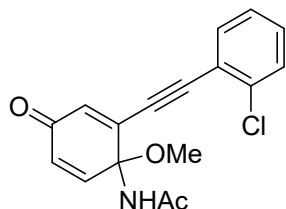

8

***N*-(2-((2-chlorophenyl)ethynyl)-1-methoxy-4-oxocyclohexa-2,5-dien-1-yl)acetamide 8:** 28.9 mg, 97% yield. Yellow solid, mp:178-179 °C. <sup>1</sup>H NMR (400 MHz, Chloroform-*d*) δ 7.55 (d, *J* = 7.2 Hz, 1H), 7.46 (d, *J* = 7.3 Hz, 1H), 7.36 (t, *J* = 7.2 Hz, 1H), 7.29 (t, *J* = 7.3 Hz, 1H), 6.92 (d, *J* = 10.3 Hz, 1H), 6.68 (s, 1H), 6.46-6.44 (m, 2H), 3.25 (s, 3H), 2.03 (s, 3H); <sup>13</sup>C NMR (101 MHz, CDCl<sub>3</sub>) δ 184.5, 168.9, 144.6, 138.5, 136.5, 134.7, 133.7, 130.9, 130.7, 129.5, 126.9, 121.6, 97.2, 88.9, 80.5, 51.0, 23.7; HRMS (*m/z*): [M+H]<sup>+</sup> calcd. for C<sub>17</sub>H<sub>15</sub>ClNO<sub>3</sub>, 316.0735; found, 316.0731.

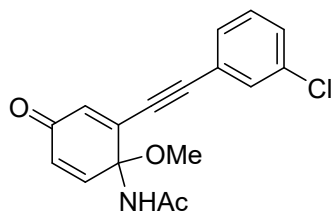

9

***N*-(2-((3-chlorophenyl)ethynyl)-1-methoxy-4-oxocyclohexa-2,5-dien-1-yl)acetamide 9:** 26.8 mg, 91% yield. Yellow solid, mp:189-190 °C. <sup>1</sup>H NMR (400 MHz, Chloroform-*d*) δ 7.50 (s, 1H), 7.41-7.38 (m, 2H), 7.33 (d, *J* = 7.8 Hz, 1H), 6.84 (d, *J* = 10.3 Hz, 1H), 6.67 (d, *J* = 2.0 Hz, 1H), 6.45 (dd, *J* = 10.3, 2.0 Hz, 1H), 6.31 (s, 1H), 3.24 (s, 3H), 2.03 (s, 3H); <sup>13</sup>C NMR (101 MHz, CDCl<sub>3</sub>) δ 184.4, 168.7, 144.6, 138.5, 135.2, 134.5, 131.9, 131.1, 130.2, 130.1, 129.9, 123.3, 98.8, 85.0, 80.5, 51.0, 23.6; HRMS (*m/z*): [M+H]<sup>+</sup> calcd. for C<sub>17</sub>H<sub>15</sub>ClNO<sub>3</sub>, 316.0735; found, 316.0736.

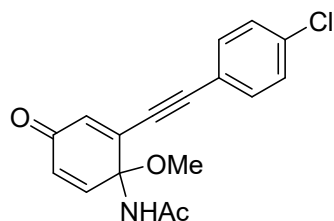

**10**

***N*-(2-((4-chlorophenyl)ethynyl)-1-methoxy-4-oxocyclohexa-2,5-dien-1-yl)acetamide 10:** 29.5 mg, 98% yield. Yellow solid, mp:176-177 °C. <sup>1</sup>H NMR (400 MHz, Chloroform-*d*) δ 7.45 (d, *J* = 8.6 Hz, 2H), 7.36 (d, *J* = 8.6 Hz, 2H), 6.85 (d, *J* = 10.3 Hz, 1H), 6.66 (d, *J* = 2.0 Hz, 1H), 6.45 (dd, *J* = 10.3, 2.0 Hz, 1H), 6.26 (s, 1H), 3.24 (s, 3H), 2.02 (s, 3H); <sup>13</sup>C NMR (101 MHz, CDCl<sub>3</sub>) δ 184.4, 168.7, 144.4, 138.6, 136.1, 134.9, 133.3, 131.1, 129.0, 120.0, 99.4, 84.9, 80.5, 51.0, 23.6; HRMS (*m/z*): [M+H]<sup>+</sup> calcd. for C<sub>17</sub>H<sub>15</sub>ClNO<sub>3</sub>, 316.0735; found, 316.0734.

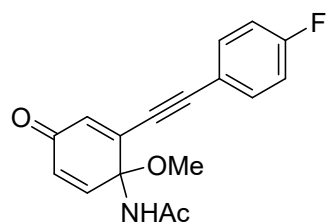

**11**

***N*-(2-((4-fluorophenyl)ethynyl)-1-methoxy-4-oxocyclohexa-2,5-dien-1-yl)acetamide 11:** 28.2 mg, 97% yield. Yellow solid, mp:182-183 °C. <sup>1</sup>H NMR (400 MHz, Chloroform-*d*) δ 7.51 (dd, *J* = 8.6, 5.5 Hz, 2H), 7.08 (t, *J* = 8.6 Hz, 2H), 6.86 (d, *J* = 10.3 Hz, 1H), 6.65 (d, *J* = 2.0 Hz, 1H), 6.46-6.43 (m, 2H), 3.24 (s, 3H), 2.02 (s, 3H); <sup>13</sup>C NMR (101 MHz, CDCl<sub>3</sub>) δ 184.5, 168.8, 163.4 (d, *J* = 252.7 Hz), 144.5, 138.8, 134.6, 134.3 (d, *J* = 8.7 Hz), 131.0, 117.7 (d, *J* = 3.7 Hz), 116.1 (d, *J* = 22.3 Hz), 99.7, 83.9, 80.5, 51.0, 23.6; HRMS (*m/z*): [M+H]<sup>+</sup> calcd. for C<sub>17</sub>H<sub>15</sub>FNO<sub>3</sub>, 300.1030; found, 300.1032.

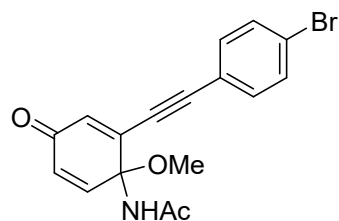

**12**

***N*-(2-((4-bromophenyl)ethynyl)-1-methoxy-4-oxocyclohexa-2,5-dien-1-yl)acetamide 12:** 34.5 mg, 91% yield. Yellow solid, mp:147-148 °C. <sup>1</sup>H NMR (400 MHz, Chloroform-*d*) δ 7.52 (d, *J* = 8.4 Hz, 2H), 7.38 (d, *J* = 8.4 Hz, 2H), 6.85 (d, *J* = 10.3 Hz, 1H), 6.66 (d, *J* = 1.9 Hz, 1H), 6.45 (dd, *J* = 10.3, 1.9 Hz, 1H), 6.24 (s, 1H), 3.24 (s, 3H), 2.02 (s, 3H); <sup>13</sup>C NMR (101 MHz, CDCl<sub>3</sub>) δ 184.4, 168.6, 144.4, 138.6, 134.9, 133.5, 132.0, 131.1, 124.4, 120.5, 99.4, 85.1, 80.5, 51.1, 23.6; HRMS (*m/z*): [M+H]<sup>+</sup> calcd. for C<sub>17</sub>H<sub>15</sub>BrNO<sub>3</sub>, 360.0230; found, 360.0229.

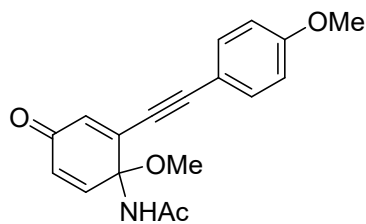

**13**

***N*-(1-methoxy-2-((4-methoxyphenyl)ethynyl)-4-oxocyclohexa-2,5-dien-1-yl)acetamide 13:** 23.6 mg, 85% yield. Yellow solid, mp:165-166 °C. <sup>1</sup>H NMR (400 MHz, Chloroform-*d*) δ 7.47 (d, *J* = 8.7 Hz, 2H), 6.95 (d, *J* = 10.3 Hz, 1H), 6.90 (d, *J* = 8.7 Hz, 2H), 6.62 (d, *J* = 2.0 Hz, 1H), 6.43 (dd, *J* = 10.3, 2.0 Hz, 1H), 6.28 (s, 1H), 3.85 (s, 3H), 3.24 (s, 3H), 2.02 (s, 3H); <sup>13</sup>C NMR (101 MHz, CDCl<sub>3</sub>) δ 184.6, 168.8, 160.9, 144.3, 139.2, 133.9, 133.8, 130.9, 114.3, 113.5, 101.7, 83.3, 80.5, 55.4, 51.1, 23.7; HRMS (*m/z*): [M+H]<sup>+</sup> calcd. for C<sub>18</sub>H<sub>18</sub>NO<sub>4</sub>, 312.1230; found, 312.1233.

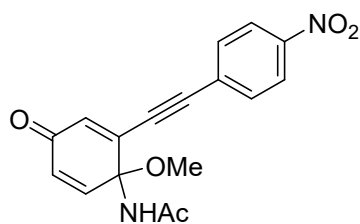

**14**

***N*-(1-methoxy-2-((4-nitrophenyl)ethynyl)-4-oxocyclohexa-2,5-dien-1-yl)acetamide 14:** 17.4 mg, 58% yield. Yellow solid, mp:161-162 °C. <sup>1</sup>H NMR (400 MHz, Chloroform-*d*) δ 8.25 (d, *J* = 8.8 Hz, 2H), 7.67 (d, *J* = 8.8 Hz, 2H), 6.78 (d, *J* = 10.3 Hz, 1H), 6.72 (d, *J* = 2.1 Hz, 1H), 6.48 (dd, *J* = 10.3, 2.1 Hz, 1H), 6.14 (s, 1H), 3.27 (s, 3H), 2.03 (s, 3H); <sup>13</sup>C NMR (101 MHz, CDCl<sub>3</sub>) δ 184.1, 168.5, 144.5, 137.4, 136.0, 134.9, 132.9, 131.3, 128.2, 123.8, 97.3, 88.3, 80.5, 51.1, 23.6; HRMS (*m/z*): [M+H]<sup>+</sup> calcd. for C<sub>17</sub>H<sub>15</sub>N<sub>2</sub>O<sub>5</sub>, 327.0975; found, 327.0971.

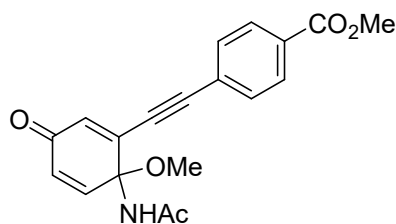

**15**

**methyl 4-((6-acetamido-6-methoxy-3-oxocyclohexa-1,4-dien-1-yl)ethynyl)benzoate 15:** 20.7 mg, 60% yield. White solid, mp:139-140 °C. <sup>1</sup>H NMR (400 MHz, Chloroform-*d*) δ 8.04 (d, *J* = 8.4 Hz, 2H), 7.57 (d, *J* = 8.3 Hz, 2H), 6.83 (d, *J* = 10.3 Hz, 1H), 6.69 (d, *J* = 1.9 Hz, 1H), 6.46 (dd, *J* = 10.3, 1.9 Hz, 1H), 6.34 (s, 1H), 3.94 (s, 3H), 3.25 (s, 3H), 2.03 (s, 3H); <sup>13</sup>C NMR (101 MHz, CDCl<sub>3</sub>) δ 184.4, 168.7, 166.2, 144.5, 138.4, 135.3, 132.0, 131.1, 130.9, 129.7, 126.1, 99.3, 86.4, 80.5, 52.4, 51.0, 23.6; HRMS (*m/z*): [M+H]<sup>+</sup> calcd. for C<sub>19</sub>H<sub>18</sub>NO<sub>5</sub>, 340.1179; found, 340.1181.

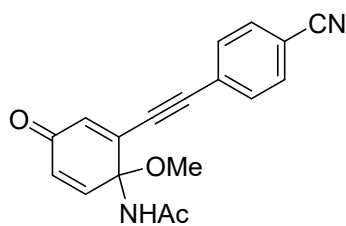

**16**

*N*-(2-((4-cyanophenyl)ethynyl)-1-methoxy-4-oxocyclohexa-2,5-dien-1-yl)acetamide **16**: 20.9 mg, 67% yield. White solid, mp: 172-173 °C. <sup>1</sup>H NMR (400 MHz, Chloroform-*d*) δ 7.68 (d, *J* = 8.2 Hz, 2H), 7.61 (d, *J* = 8.1 Hz, 2H), 6.79 (d, *J* = 10.3 Hz, 1H), 6.70 (d, *J* = 2.0 Hz, 1H), 6.48 (dd, *J* = 10.3, 2.0 Hz, 1H), 6.17 (s, 1H), 3.25 (s, 3H), 2.02 (s, 3H); <sup>13</sup>C NMR (101 MHz, CDCl<sub>3</sub>) δ 184.1, 168.5, 144.4, 137.9, 135.9, 132.6, 132.2, 131.3, 126.3, 118.0, 113.1, 97.7, 87.6, 80.5, 51.1, 23.6; HRMS (*m/z*): [M+H]<sup>+</sup> calcd. for C<sub>18</sub>H<sub>15</sub>N<sub>2</sub>O<sub>3</sub>, 307.1077; found, 307.1076.

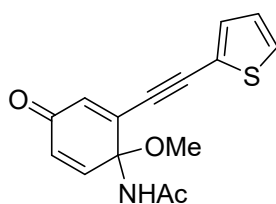

**17**

*N*-(1-methoxy-4-oxo-2-(thiophen-2-ylethynyl)cyclohexa-2,5-dien-1-yl)acetamide **17**: 18.3 mg, 64% yield. Yellow solid, mp: 138-139 °C. <sup>1</sup>H NMR (400 MHz, Chloroform-*d*) δ 7.43 (d, *J* = 4.9 Hz, 1H), 7.37 (d, *J* = 3.0 Hz, 1H), 7.08-7.04 (m, 1H), 6.87 (d, *J* = 10.3 Hz, 1H), 6.64 (d, *J* = 2.0 Hz, 1H), 6.45 (dd, *J* = 10.3, 2.0 Hz, 1H), 6.25 (s, 1H), 3.24 (s, 3H), 2.03 (s, 3H). <sup>13</sup>C NMR (101 MHz, CDCl<sub>3</sub>) δ 184.4, 168.7, 144.3, 138.6, 134.2, 134.1, 131.1, 129.8, 127.6, 121.4, 94.2, 88.2, 80.5, 51.1, 23.6; HRMS (*m/z*): [M+H]<sup>+</sup> calcd. for C<sub>15</sub>H<sub>14</sub>NO<sub>3</sub>S, 288.0689; found, 288.0691.

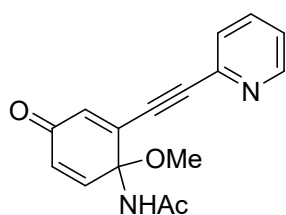

**18**

*N*-(1-methoxy-4-oxo-2-(pyridin-2-ylethynyl)cyclohexa-2,5-dien-1-yl)acetamide **18**: 23.8 mg, 85% yield. Black solid, mp: 154-155 °C. <sup>1</sup>H NMR (400 MHz, Chloroform-*d*) δ 8.65 (ddd, *J* = 4.9, 1.8, 1.0 Hz, 1H), 7.74 (td, *J* = 7.8, 1.7 Hz, 1H), 7.55 (dt, *J* = 7.8, 1.1 Hz, 1H), 7.33 (ddd, *J* = 7.6, 4.9, 1.0 Hz, 1H), 6.85 (d, *J* = 10.3 Hz, 1H), 6.73 (d, *J* = 2.0 Hz, 1H), 6.70 (s, 1H), 6.46 (dd, *J* = 10.3, 2.0 Hz, 1H), 3.26 (s, 3H), 2.03 (s, 3H); <sup>13</sup>C NMR (101 MHz, CDCl<sub>3</sub>) δ 184.4, 169.0, 150.3, 144.9, 141.9, 138.2, 136.6, 135.7, 130.8, 128.0, 124.1, 98.5, 83.4, 80.6, 51.0, 23.5. HRMS (*m/z*): [M+H]<sup>+</sup> calcd. for C<sub>16</sub>H<sub>15</sub>N<sub>2</sub>O<sub>3</sub>, 283.1077; found, 283.1074.

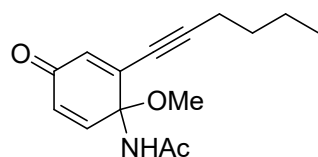

**19**

***N*-(2-(hex-1-yn-1-yl)-1-methoxy-4-oxocyclohexa-2,5-dien-1-yl)acetamide 19:** 26.1 mg, 98% yield. White solid, mp: 169-170 °C. <sup>1</sup>H NMR (400 MHz, Chloroform-*d*) δ 6.93 (d, *J* = 10.3 Hz, 1H), 6.50 (d, *J* = 2.0 Hz, 1H), 6.40 (dd, *J* = 10.3, 2.0 Hz, 1H), 6.24 (s, 1H), 3.19 (s, 3H), 2.46 (t, *J* = 7.0 Hz, 2H), 2.00 (s, 3H), 1.59 (p, *J* = 7.0 Hz, 3H), 1.51-1.40 (m, 2H), 0.95 (t, *J* = 7.3 Hz, 3H). <sup>13</sup>C NMR (101 MHz, CDCl<sub>3</sub>) δ 184.8, 168.7, 144.3, 139.5, 134.2, 130.7, 103.7, 80.4, 75.9, 50.9, 30.3, 23.7, 22.0, 19.6, 13.5; HRMS (*m/z*): [M+H]<sup>+</sup> calcd. for C<sub>15</sub>H<sub>20</sub>NO<sub>3</sub>, 262.1438; found, 262.1439.

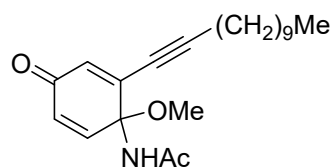

**20**

***N*-(2-(dodec-1-yn-1-yl)-1-methoxy-4-oxocyclohexa-2,5-dien-1-yl)acetamide 20:** 28.9 mg, 83% yield. Brown oil. <sup>1</sup>H NMR (400 MHz, Chloroform-*d*) δ 6.93 (d, *J* = 10.2 Hz, 1H), 6.50 (s, 1H), 6.39 (d, *J* = 10.3 Hz, 1H), 6.26 (s, 1H), 3.19 (s, 3H), 2.44 (t, *J* = 6.8 Hz, 2H), 2.00 (s, 3H), 1.60 (p, *J* = 6.7 Hz, 2H), 1.42 (p, *J* = 6.9 Hz, 2H), 1.33-1.27 (m, 12H), 0.88 (t, *J* = 5.9 Hz, 3H). <sup>13</sup>C NMR (101 MHz, CDCl<sub>3</sub>) δ 184.8, 168.7, 144.3, 139.5, 134.2, 130.7, 103.8, 80.4, 75.8, 51.0, 31.9, 29.6, 29.5, 29.3, 29.1, 28.9, 28.3, 23.7, 22.7, 19.9, 14.1; HRMS (*m/z*): [M+H]<sup>+</sup> calcd. for C<sub>21</sub>H<sub>32</sub>NO<sub>3</sub>, 346.2377; found, 346.2374.

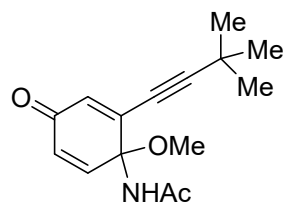

**21**

***N*-(2-(3,3-dimethylbut-1-yn-1-yl)-1-methoxy-4-oxocyclohexa-2,5-dien-1-yl)acetamide 21:** 25.7 mg, 98% yield. White solid, mp: 170-171 °C. <sup>1</sup>H NMR (400 MHz, Chloroform-*d*) δ 6.90 (d, *J* = 10.3 Hz, 1H), 6.48 (d, *J* = 2.0 Hz, 1H), 6.39 (dd, *J* = 10.3, 2.0 Hz, 1H), 6.23 (s, 1H), 3.17 (s, 3H), 2.00 (s, 3H), 1.31 (s, 9H). <sup>13</sup>C NMR (101 MHz, CDCl<sub>3</sub>) δ 184.9, 168.7, 144.4, 139.5, 133.9, 130.7, 111.6, 80.3, 74.4, 50.8, 30.6, 28.5, 23.6; HRMS (*m/z*): [M+H]<sup>+</sup> calcd. for C<sub>15</sub>H<sub>20</sub>NO<sub>3</sub>, 262.1438; found, 262.1436.

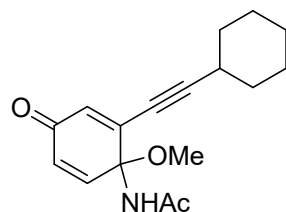

**22**

***N*-(2-(cyclohexylethynyl)-1-methoxy-4-oxocyclohexa-2,5-dien-1-yl)acetamide 22:** 26.7 mg, 97% yield. White solid, mp: 166-167 °C. <sup>1</sup>H NMR (400 MHz, Chloroform-*d*) δ 6.93 (d, *J* = 10.3 Hz, 1H), 6.49 (d, *J* = 2.0 Hz, 1H), 6.39 (dd, *J* = 10.3, 2.0 Hz, 1H), 6.25 (s, 1H), 3.18 (s, 3H), 2.66 (tt, *J* = 8.8, 3.9 Hz,

1H), 2.00 (s, 3H), 1.89-1.80 (m, 2H), 1.77-1.66 (m, 2H), 1.60-1.47 (m, 3H), 1.43-1.34 (m, 3H). <sup>13</sup>C NMR (101 MHz, CDCl<sub>3</sub>) δ 184.9, 168.8, 144.4, 139.6, 133.9, 130.7, 107.7, 80.4, 76.0, 50.9, 32.1, 29.9, 25.7, 24.6, 23.6; HRMS (m/z): [M+H]<sup>+</sup> calcd. for C<sub>17</sub>H<sub>22</sub>NO<sub>3</sub>, 288.1594; found, 288.1594.

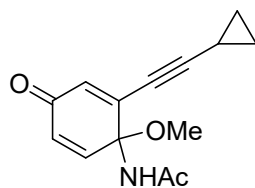

**23**

***N*-(2-(cyclopropylethynyl)-1-methoxy-4-oxocyclohexa-2,5-dien-1-yl)acetamide 23**: 24.1 mg, 99% yield. White solid, mp: 152-153 °C. <sup>1</sup>H NMR (400 MHz, Chloroform-*d*) δ 6.92 (d, *J* = 10.3 Hz, 1H), 6.46 (d, *J* = 2.0 Hz, 1H), 6.39 (dd, *J* = 10.3, 2.0 Hz, 1H), 6.29 (s, 1H), 3.18 (s, 3H), 2.01 (s, 3H), 1.49 (tt, *J* = 8.2, 5.1 Hz, 1H), 0.98 (dt, *J* = 8.2, 3.3 Hz, 2H), 0.89-0.83 (m, 2H). <sup>13</sup>C NMR (101 MHz, CDCl<sub>3</sub>) δ 184.8, 168.8, 144.3, 139.6, 133.8, 130.7, 107.3, 80.4, 71.1, 50.9, 23.7, 9.7, 0.8; HRMS (m/z): [M+H]<sup>+</sup> calcd. for C<sub>14</sub>H<sub>16</sub>NO<sub>3</sub>, 246.1125; found, 246.1122.

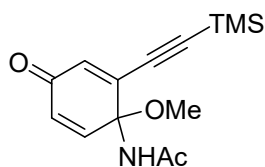

**24**

***N*-(1-methoxy-4-oxo-2-((trimethylsilyl)ethynyl)cyclohexa-2,5-dien-1-yl)acetamide 24**: 19.8 mg, 65% yield. White solid, mp: 185-186 °C. <sup>1</sup>H NMR (400 MHz, Chloroform-*d*) δ 6.88 (d, *J* = 10.3 Hz, 1H), 6.56 (d, *J* = 2.0 Hz, 1H), 6.41 (dd, *J* = 10.3, 2.0 Hz, 1H), 6.11 (s, 1H), 3.19 (s, 3H), 2.00 (s, 3H), 0.25 (s, 9H); <sup>13</sup>C NMR (101 MHz, CDCl<sub>3</sub>) δ 184.6, 168.7, 144.4, 138.4, 135.2, 130.8, 108.1, 98.8, 80.2, 51.0, 23.6, -0.4; HRMS (m/z): [M+H]<sup>+</sup> calcd. for C<sub>14</sub>H<sub>20</sub>NO<sub>3</sub>Si, 278.1207; found, 278.1207.

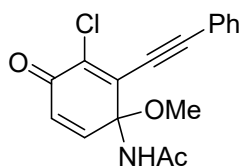

**26**

***N*-(3-chloro-1-methoxy-4-oxo-2-(phenylethynyl)cyclohexa-2,5-dien-1-yl)acetamide 26**: 17.1 mg, 55% yield. White solid, mp: 174-175 °C. <sup>1</sup>H NMR (400 MHz, Chloroform-*d*) δ 7.59-7.57 (m, 2H), 7.45-7.38 (m, 3H), 6.90 (d, *J* = 10.2 Hz, 1H), 6.55 (d, *J* = 10.2 Hz, 1H), 6.35 (s, 1H), 3.25 (s, 3H), 2.02 (s, 3H); <sup>13</sup>C NMR (101 MHz, CDCl<sub>3</sub>) δ 177.5, 168.7, 144.8, 137.7, 135.7, 132.3, 130.3, 129.8, 128.7, 128.7, 121.5, 107.3, 82.8, 82.3, 51.2, 23.6; HRMS (m/z): [M]<sup>+</sup> calcd. for C<sub>17</sub>H<sub>15</sub>ClNO<sub>3</sub>, 316.0735; found, 316.0730.

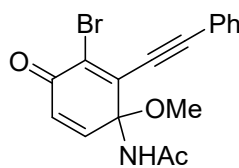

**27**



***N*-(3-bromo-1-methoxy-4-oxo-2-(phenylethynyl)cyclohexa-2,5-dien-1-yl)acetamide 27**: 24.2 mg, 67% yield. White solid, mp:184-185 °C. <sup>1</sup>H NMR (400 MHz, Chloroform-*d*) δ 7.60-7.58 (m, 2H), 7.47-7.38 (m, 3H), 6.91 (d, *J* = 10.2 Hz, 1H), 6.57 (d, *J* = 10.2 Hz, 1H), 6.30 (s, 1H), 3.26 (s, 3H), 2.02 (s, 3H); <sup>13</sup>C NMR (101 MHz, CDCl<sub>3</sub>) δ 177.5, 168.6, 144.6, 139.4, 132.3, 131.4, 130.3, 129.4, 128.7, 121.5, 106.6, 85.0, 82.4, 51.2, 23.6; HRMS (*m/z*): [M+H]<sup>+</sup> calcd. for C<sub>17</sub>H<sub>15</sub>BrNO<sub>3</sub>, 360.0230; found, 360.0233.

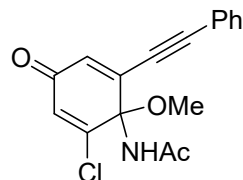

**28**

***N*-(2-chloro-1-methoxy-4-oxo-6-(phenylethynyl)cyclohexa-2,5-dien-1-yl)acetamide 28**: 19.1 mg, 61% yield. White solid, mp:188-189 °C. <sup>1</sup>H NMR (400 MHz, Chloroform-*d*) δ 7.54-7.51 (m, 2H), 7.44-7.37 (m, 3H), 7.08 (s, 1H), 6.74 (s, 1H), 6.21 (s, 1H), 3.28 (s, 3H), 2.03 (s, 3H); <sup>13</sup>C NMR (101 MHz, CDCl<sub>3</sub>) δ 177.6, 168.7, 140.7, 139.5, 134.8, 133.3, 132.2, 130.1, 128.7, 121.3, 102.2, 83.5, 82.1, 51.3, 23.6; HRMS (*m/z*): [M]<sup>+</sup> calcd. for C<sub>17</sub>H<sub>15</sub>ClNO<sub>3</sub>, 316.0735; found, 316.0732.

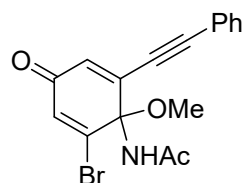

**29**

***N*-(2-bromo-1-methoxy-4-oxo-6-(phenylethynyl)cyclohexa-2,5-dien-1-yl)acetamide 29**: 18.5 mg, 53% yield. White solid, mp:171-172 °C. <sup>1</sup>H NMR (400 MHz, Chloroform-*d*) δ 7.53-7.51 (m, 2H), 7.44-7.37 (m, 3H), 7.34 (s, 1H), 6.76 (s, 1H), 6.20 (s, 1H), 3.29 (s, 3H), 2.03 (s, 3H); <sup>13</sup>C NMR (101 MHz, CDCl<sub>3</sub>) δ 177.5, 168.6, 145.1, 139.4, 132.8, 132.2, 130.1, 128.7, 126.4, 121.3, 102.1, 83.6, 82.4, 51.4, 23.6; HRMS (*m/z*): [M+H]<sup>+</sup> calcd. for C<sub>17</sub>H<sub>15</sub>BrNO<sub>3</sub>, 360.0230; found, 360.0232.

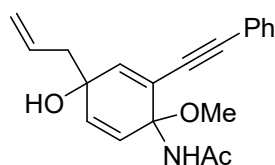

**30**

***N*-(4-allyl-4-hydroxy-1-methoxy-2-(phenylethynyl)cyclohexa-2,5-dien-1-yl)acetamide 30**: 28.7 mg, 94% yield. Colorless oil. <sup>1</sup>H NMR (400 MHz, Chloroform-*d*) δ 7.47-7.45 (m, 2H), 7.33-7.31 (m, 3H), 6.58 (d, *J* = 2.2 Hz, 1H), 6.24 (s, 1H), 6.23 (dd, *J* = 10.0, 2.1 Hz, 1H), 5.73 (ddt, *J* = 17.3, 10.1, 7.2 Hz, 1H), 5.59 (d, *J* = 10.0 Hz, 1H), 5.13 (dd, *J* = 17.3, 1.8 Hz, 1H), 5.10-5.06 (m, 1H), 4.57 (s, 1H), 3.18 (s, 3H), 2.49 (d, *J* = 7.3 Hz, 2H), 1.94 (s, 3H); <sup>13</sup>C NMR (101 MHz, CDCl<sub>3</sub>) δ 168.3, 144.5, 138.2, 132.3, 131.8, 128.5, 128.3, 127.5, 122.9, 122.1, 118.7, 90.8, 85.1, 80.9, 66.6, 50.4, 44.2, 24.0; HRMS (*m/z*): [M+H]<sup>+</sup> calcd. for C<sub>20</sub>H<sub>22</sub>NO<sub>3</sub>, 324.1594; found, 324.1596.

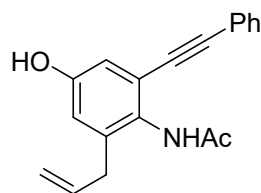

**31**

***N*-(2-allyl-4-hydroxy-6-(phenylethynyl)phenyl)acetamide 31**: 19.1 mg, 78% yield. Yellow solid, mp: 171-172 °C. <sup>1</sup>H NMR (400 MHz, Chloroform-*d*) δ 8.02 (s, 1H), 7.77 (s, 1H), 7.49-7.47 (m, 2H), 7.36-7.34 (m, 3H), 6.95 (s, 1H), 6.58 (s, 1H), 5.98 (ddt, *J* = 16.8, 10.2, 6.4 Hz, 1H), 5.14-5.09 (m, 2H), 3.38 (d, *J* = 6.6 Hz, 2H), 2.22 (s, 3H); <sup>13</sup>C NMR (101 MHz, CDCl<sub>3</sub>) δ 168.5, 150.7, 135.9, 131.9, 131.5, 128.8, 128.6, 128.4, 128.1, 122.5, 118.1, 116.6, 112.1, 95.6, 84.5, 35.1, 24.7; HRMS (*m/z*): [M+H]<sup>+</sup> calcd. for C<sub>19</sub>H<sub>18</sub>NO<sub>2</sub>, 292.1332; found, 292.1333.

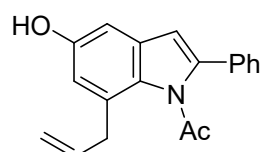

**32**

**1-(7-allyl-5-hydroxy-2-phenyl-1*H*-indol-1-yl)ethan-1-one 32**: 18.5 mg, 75% yield. White solid, mp: 186-187 °C. <sup>1</sup>H NMR (400 MHz, Chloroform-*d*) δ 8.19 (s, 1H), 7.46-7.41 (m, 5H), 6.98 (s, 1H), 6.50 (s, 1H), 6.08 (ddt, *J* = 16.6, 9.6, 6.3 Hz, 1H), 5.22-5.19 (m, 1H), 5.18-5.16 (m, 1H), 5.07 (s, 1H), 3.55 (d, *J* = 6.3 Hz, 2H), 2.04 (s, 3H); <sup>13</sup>C NMR (101 MHz, CDCl<sub>3</sub>) δ 171.3, 151.1, 140.0, 136.8, 134.3, 132.9, 129.0, 128.8, 128.7, 128.6, 123.9, 117.7, 116.5, 111.3, 106.1, 36.2, 27.8; HRMS (*m/z*): [M+H]<sup>+</sup> calcd. for C<sub>19</sub>H<sub>18</sub>NO<sub>2</sub>, 292.1332; found, 292.1332.

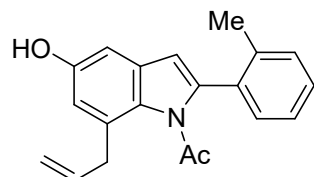

**33**

**1-(7-allyl-5-hydroxy-2-(*o*-tolyl)-1*H*-indol-1-yl)ethan-1-one 33**: 8.5 mg, 66% yield. Colorless oil. <sup>1</sup>H NMR (400 MHz, Chloroform-*d*) δ 8.28 (s, 1H), 7.36-7.27 (m, 4H), 6.98 (s, 1H), 6.40 (s, 1H), 6.09 (ddt, *J* = 17.2, 10.0, 6.3 Hz, 1H), 5.21 (dd, *J* = 17.1, 1.7 Hz, 1H), 5.18 (dd, *J* = 10.0, 1.6 Hz, 1H), 5.01 (s, 1H), 3.56 (d, *J* = 6.3 Hz, 2H), 2.21 (s, 3H), 1.90 (s, 3H); <sup>13</sup>C NMR (101 MHz, CDCl<sub>3</sub>) δ 170.7, 151.1, 138.8, 137.5, 136.8, 134.1, 132.3, 130.4, 130.4, 129.2, 129.0, 126.1, 123.6, 118.4, 116.5, 111.0, 106.0, 36.2, 26.4, 20.0; HRMS (*m/z*): [M+H]<sup>+</sup> calcd. for C<sub>20</sub>H<sub>20</sub>NO<sub>2</sub>, 306.1489; found, 306.1489.

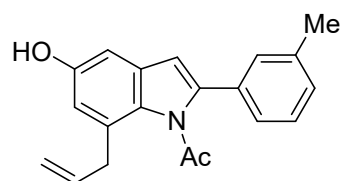

**34**

**1-(7-allyl-5-hydroxy-2-(*m*-tolyl)-1*H*-indol-1-yl)ethan-1-one 34**: 8.1 mg, 63% yield. Yellow oil. <sup>1</sup>H

NMR (400 MHz, Chloroform-*d*)  $\delta$  8.18 (s, 1H), 7.33 (t,  $J = 7.5$  Hz, 1H), 7.27-7.21 (m, 3H), 6.97 (s, 1H), 6.47 (s, 1H), 6.08 (ddt,  $J = 17.2, 10.1, 6.3$  Hz, 1H), 5.19 (dd,  $J = 17.1, 1.7$  Hz, 1H), 5.17 (dd,  $J = 10.0, 1.6$  Hz, 1H), 5.09 (s, 1H), 3.55 (d,  $J = 6.3$  Hz, 2H), 2.41 (s, 3H), 2.05 (s, 3H);  $^{13}\text{C}$  NMR (101 MHz,  $\text{CDCl}_3$ )  $\delta$  171.4, 151.1, 140.2, 138.5, 136.8, 134.2, 132.8, 129.6, 129.3, 128.8, 128.6, 126.1, 123.8, 117.7, 116.4, 111.1, 106.0, 36.1, 27.8, 21.4; HRMS ( $m/z$ ):  $[\text{M}+\text{H}]^+$  calcd. for  $\text{C}_{20}\text{H}_{20}\text{NO}_2$ , 306.1489; found, 306.1490.

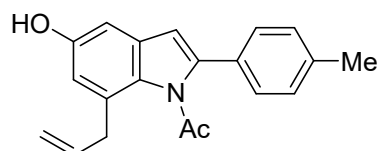

**35**

**1-(7-allyl-5-hydroxy-2-(*p*-tolyl)-1H-indol-1-yl)ethan-1-one 35:** 9.7 mg, 74% yield. Yellow oil.  $^1\text{H}$  NMR (400 MHz, Chloroform-*d*)  $\delta$  8.18 (s, 1H), 7.33 (d,  $J = 8.0$  Hz, 2H), 7.25 (d,  $J = 8.0$  Hz, 2H), 6.96 (s, 1H), 6.46 (s, 1H), 6.08 (ddt,  $J = 16.6, 10.1, 6.3$  Hz, 1H), 5.03 (s, 1H), 5.19 (dd,  $J = 16.7, 1.6$  Hz, 1H), 5.17 (dd,  $J = 10.1, 1.7$  Hz, 1H), 3.55 (d,  $J = 6.2$  Hz, 2H), 2.42 (s, 3H), 2.04 (s, 3H);  $^{13}\text{C}$  NMR (101 MHz,  $\text{CDCl}_3$ )  $\delta$  171.4, 151.0, 140.2, 138.6, 136.8, 132.8, 131.3, 129.4, 128.9, 128.8, 123.6, 117.7, 116.4, 110.9, 106.0, 36.2, 27.8, 21.3; HRMS ( $m/z$ ):  $[\text{M}+\text{H}]^+$  calcd. for  $\text{C}_{20}\text{H}_{20}\text{NO}_2$ , 306.1489; found, 306.1487.

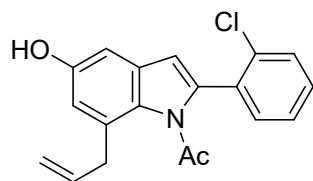

**36**

**1-(7-allyl-2-(2-chlorophenyl)-5-hydroxy-1H-indol-1-yl)ethan-1-one 36:** 9.8 mg, 68% yield. Yellow oil.  $^1\text{H}$  NMR (400 MHz, Chloroform-*d*)  $\delta$  8.25 (s, 1H), 7.50-7.45 (m, 2H), 7.42-7.35 (m, 2H), 6.99 (s, 1H), 6.48 (s, 1H), 6.09 (ddt,  $J = 17.2, 10.1, 6.3$  Hz, 1H), 5.24-5.17 (m, 2H), 3.56 (d,  $J = 6.3$  Hz, 2H), 2.05 (s, 3H);  $^{13}\text{C}$  NMR (101 MHz,  $\text{CDCl}_3$ )  $\delta$  170.2, 151.1, 136.7, 136.3, 134.7, 133.8, 132.3, 131.7, 130.4, 129.9, 128.7, 127.1, 124.2, 118.2, 116.5, 112.1, 106.2, 36.2, 26.1; HRMS ( $m/z$ ):  $[\text{M}+\text{H}]^+$  calcd. for  $\text{C}_{19}\text{H}_{17}\text{ClNO}_2$ , 326.0942; found, 326.0941.

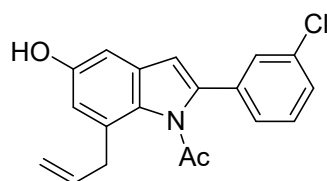

**37**

**1-(7-allyl-2-(3-chlorophenyl)-5-hydroxy-1H-indol-1-yl)ethan-1-one 37:** 9.4 mg, 66% yield. Yellow oil.  $^1\text{H}$  NMR (400 MHz, Chloroform-*d*)  $\delta$  8.15 (s, 1H), 7.47 (s, 1H), 7.39-7.38 (m, 2H), 7.33-7.31 (m, 1H), 6.98 (s, 1H), 6.52 (s, 1H), 6.08 (ddt,  $J = 16.6, 10.2, 6.3$  Hz, 1H), 5.22-5.16 (m, 2H), 3.55 (d,  $J = 6.2$  Hz, 2H), 2.10 (s, 3H);  $^{13}\text{C}$  NMR (101 MHz,  $\text{CDCl}_3$ )  $\delta$  170.8, 151.2, 138.4, 136.6, 136.0, 134.7, 132.9, 129.9, 128.8, 128.6, 128.5, 127.1, 124.4, 117.6, 116.5, 112.0, 106.2, 36.1, 27.9; HRMS ( $m/z$ ):  $[\text{M}+\text{H}]^+$  calcd. for  $\text{C}_{19}\text{H}_{17}\text{ClNO}_2$ , 326.0942; found, 326.0940.

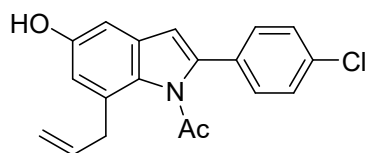

**38**

**1-(7-allyl-2-(4-chlorophenyl)-5-hydroxy-1H-indol-1-yl)ethan-1-one 38:** 10.5 mg, 70% yield. Yellow oil.  $^1\text{H NMR}$  (400 MHz, Chloroform-*d*)  $\delta$  8.15 (s, 1H), 7.43 (d,  $J = 8.5$  Hz, 2H), 7.37 (d,  $J = 8.6$  Hz, 2H), 6.97 (s, 1H), 6.49 (s, 1H), 6.07 (ddt,  $J = 16.5, 10.2, 6.3$  Hz, 1H), 5.21-5.16 (m, 2H), 5.10 (s, 1H), 3.54 (d,  $J = 6.2$  Hz, 2H), 2.08 (s, 3H);  $^{13}\text{C NMR}$  (101 MHz,  $\text{CDCl}_3$ )  $\delta$  170.9, 151.2, 138.7, 136.7, 134.7, 132.9, 132.7, 130.1, 129.0, 128.6, 124.3, 117.6, 116.5, 111.7, 106.1, 36.1, 27.9; HRMS ( $m/z$ ):  $[\text{M}+\text{H}]^+$  calcd. for  $\text{C}_{19}\text{H}_{17}\text{ClNO}_2$ , 326.0942; found, 326.0942.

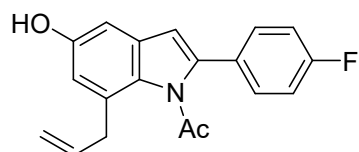

**39**

**1-(7-allyl-2-(4-fluorophenyl)-5-hydroxy-1H-indol-1-yl)ethan-1-one 39:** 7.9 mg, 62% yield. Yellow oil.  $^1\text{H NMR}$  (400 MHz, Chloroform-*d*)  $\delta$  8.16 (s, 1H), 7.44-7.40 (m, 2H), 7.17-7.13 (m, 2H), 6.97 (s, 1H), 6.48 (s, 1H), 6.08 (ddt,  $J = 16.5, 10.2, 6.3$  Hz, 1H), 5.22-5.16 (m, 2H), 3.55 (d,  $J = 6.2$  Hz, 2H), 2.05 (s, 3H);  $^{13}\text{C NMR}$  (101 MHz,  $\text{CDCl}_3$ )  $\delta$  170.9, 162.9 (d,  $J = 249.1$  Hz), 151.1, 138.8, 136.7, 132.8, 130.7 (d,  $J = 8.1$  Hz), 130.4 (d,  $J = 3.6$  Hz), 128.7, 124.0, 117.7, 116.5, 115.9 (d,  $J = 22.3$  Hz), 111.4, 106.1, 36.2, 27.8; HRMS ( $m/z$ ):  $[\text{M}+\text{H}]^+$  calcd. for  $\text{C}_{19}\text{H}_{17}\text{FNO}_2$ , 310.1238; found, 310.1240.

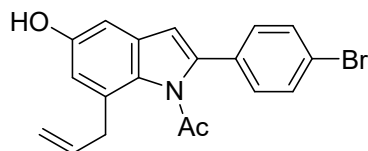

**40**

**1-(7-allyl-2-(4-bromophenyl)-5-hydroxy-1H-indol-1-yl)ethan-1-one 40:** 9.5 mg, 60% yield. White solid, mp: 174-175 °C.  $^1\text{H NMR}$  (400 MHz, Chloroform-*d*)  $\delta$  8.14 (s, 1H), 7.58 (d,  $J = 8.3$  Hz, 2H), 7.32 (d,  $J = 8.3$  Hz, 2H), 6.97 (s, 1H), 6.50 (s, 1H), 6.07 (ddt,  $J = 16.6, 10.3, 6.3$  Hz, 1H), 5.22-5.16 (m, 2H), 5.04 (s, 1H), 3.55 (d,  $J = 6.2$  Hz, 2H), 2.09 (s, 3H);  $^{13}\text{C NMR}$  (101 MHz,  $\text{CDCl}_3$ )  $\delta$  170.8, 151.2, 138.7, 136.6, 133.2, 132.9, 132.0, 130.4, 128.6, 124.2, 122.8, 117.6, 116.5, 111.7, 106.1, 36.1, 27.9; HRMS ( $m/z$ ):  $[\text{M}+\text{H}]^+$  calcd. for  $\text{C}_{19}\text{H}_{17}\text{BrNO}_2$ , 369.0364; found, 369.0365.

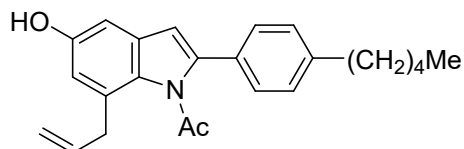

**41**

**1-(7-allyl-5-hydroxy-2-(4-pentylphenyl)-1H-indol-1-yl)ethan-1-one 41:** 9.1 mg, 58% yield. Yellow oil.  $^1\text{H NMR}$  (400 MHz, Chloroform-*d*)  $\delta$  8.18 (s, 1H), 7.34 (d,  $J = 8.1$  Hz, 2H), 7.25 (d,  $J = 8.0$  Hz, 2H), 6.96 (s, 1H), 6.47 (s, 1H), 6.08 (ddt,  $J = 16.5, 10.1, 6.3$  Hz, 1H), 5.22-5.16 (m, 2H), 4.97 (s, 1H), 3.55 (d,  $J = 6.2$  Hz, 2H), 2.68-2.64 (m, 2H), 2.03 (s, 3H), 1.66 (p,  $J = 7.3$  Hz, 2H), 1.38-1.33 (m, 4H), 0.91 (t,

$J = 6.9$  Hz, 3H);  $^{13}\text{C}$  NMR (101 MHz,  $\text{CDCl}_3$ )  $\delta$  171.4, 151.0, 143.7, 140.2, 136.8, 132.8, 131.5, 128.9, 128.8, 128.7, 123.6, 117.7, 116.4, 110.9, 106.0, 36.2, 35.7, 31.5, 31.0, 27.7, 22.5, 14.0; HRMS ( $m/z$ ):  $[\text{M}+\text{H}]^+$  calcd. for  $\text{C}_{24}\text{H}_{28}\text{NO}_2$ , 361.2115; found, 361.2115.

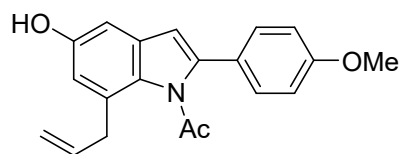

**42**

**1-(7-allyl-5-hydroxy-2-(4-methoxyphenyl)-1H-indol-1-yl)ethan-1-one 42:** 8.3 mg, 75% yield. Yellow oil.  $^1\text{H}$  NMR (400 MHz, Chloroform- $d$ )  $\delta$  8.18 (s, 1H), 7.35 (d,  $J = 8.8$  Hz, 2H), 6.97 (d,  $J = 8.8$  Hz, 2H), 6.96 (s, 1H), 6.44 (s, 1H), 6.08 (ddt,  $J = 17.2, 10.1, 6.3$  Hz, 1H), 5.19 (dd,  $J = 17.1, 1.7$  Hz, 1H), 5.17 (dd,  $J = 10.1, 1.6$  Hz, 1H), 3.86 (s, 3H), 3.54 (d,  $J = 6.2$  Hz, 2H), 2.04 (s, 3H);  $^{13}\text{C}$  NMR (101 MHz,  $\text{CDCl}_3$ )  $\delta$  171.3, 160.0, 151.0, 139.9, 136.8, 132.7, 130.3, 128.8, 126.5, 123.5, 117.7, 116.4, 114.2, 110.7, 105.9, 55.4, 36.2, 27.7; HRMS ( $m/z$ ):  $[\text{M}+\text{H}]^+$  calcd. for  $\text{C}_{20}\text{H}_{20}\text{NO}_3$ , 322.1438; found, 322.1437.

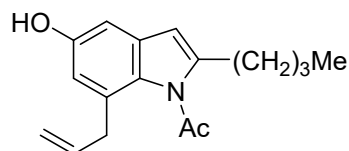

**43**

**1-(7-allyl-2-butyl-5-hydroxy-1H-indol-1-yl)ethan-1-one 43:** 9.9 mg, 65% yield. White solid, mp: 169-170  $^\circ\text{C}$ .  $^1\text{H}$  NMR (400 MHz, Chloroform- $d$ )  $\delta$  7.67 (s, 1H), 6.89 (s, 1H), 6.28 (s, 1H), 6.06 (ddt,  $J = 17.9, 9.7, 6.3$  Hz, 1H), 5.18-5.14 (m, 2H), 3.51 (d,  $J = 6.2$  Hz, 2H), 2.95 (t,  $J = 7.6$  Hz, 2H), 2.71 (s, 3H), 1.68 (p,  $J = 7.5$  Hz, 2H), 1.44 (h,  $J = 7.4$  Hz, 2H), 0.96 (t,  $J = 7.3$  Hz, 3H);  $^{13}\text{C}$  NMR (101 MHz,  $\text{CDCl}_3$ )  $\delta$  170.1, 150.5, 143.0, 136.8, 131.6, 129.7, 122.0, 116.7, 116.4, 107.9, 105.9, 36.0, 31.1, 30.4, 27.5, 22.6, 14.0; HRMS ( $m/z$ ):  $[\text{M}+\text{H}]^+$  calcd. for  $\text{C}_{17}\text{H}_{22}\text{NO}_2$ , 272.1645; found, 272.1645.

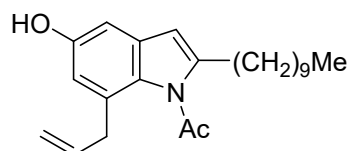

**44**

**1-(7-allyl-2-decyl-5-hydroxy-1H-indol-1-yl)ethan-1-one 44:** 6.1 mg, 55% yield. Yellow oil.  $^1\text{H}$  NMR (400 MHz, Chloroform- $d$ )  $\delta$  7.68 (s, 1H), 6.89 (s, 1H), 6.29 (s, 1H), 6.06 (ddt,  $J = 17.8, 9.8, 6.2$  Hz, 1H), 5.19-5.14 (m, 2H), 4.86 (s, 1H), 3.51 (d,  $J = 6.2$  Hz, 2H), 2.94 (t,  $J = 7.6$  Hz, 2H), 2.70 (s, 3H), 1.69 (p,  $J = 7.6$  Hz, 2H), 1.32-1.27 (m, 14H), 0.88 (t,  $J = 6.5$  Hz, 3H);  $^{13}\text{C}$  NMR (101 MHz,  $\text{CDCl}_3$ )  $\delta$  170.0, 150.5, 143.1, 136.8, 131.6, 129.7, 121.8, 116.7, 116.4, 107.9, 105.9, 36.0, 31.9, 30.7, 29.7, 29.6, 29.5, 29.5, 29.3, 28.9, 27.5, 22.7, 14.1; HRMS ( $m/z$ ):  $[\text{M}+\text{H}]^+$  calcd. for  $\text{C}_{23}\text{H}_{34}\text{NO}_2$ , 356.2584; found, 356.2583.

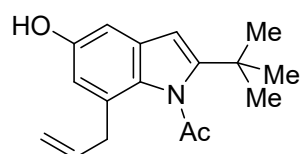

**45**

**1-(7-allyl-2-(tert-butyl)-5-hydroxy-1*H*-indol-1-yl)ethan-1-one 45:** 7.4 mg, 50% yield. Yellow solid, mp:171-172 °C. <sup>1</sup>H NMR (400 MHz, Chloroform-*d*) δ 7.22 (s, 1H), 6.91 (s, 1H), 6.40 (s, 1H), 6.05 (ddt, *J* = 16.7, 10.5, 6.2 Hz, 1H), 5.18-5.13 (m, 2H), 4.83 (s, 1H), 3.50 (d, *J* = 6.1 Hz, 2H), 2.77 (s, 3H), 1.45 (s, 9H); <sup>13</sup>C NMR (101 MHz, CDCl<sub>3</sub>) δ 171.8, 152.3, 149.9, 136.7, 131.8, 129.1, 121.8, 116.5, 114.9, 106.4, 106.2, 35.9, 34.2, 30.5, 28.1; HRMS (m/z): [M+H]<sup>+</sup> calcd. for C<sub>17</sub>H<sub>22</sub>NO<sub>2</sub>, 272.1645; found, 272.1647.

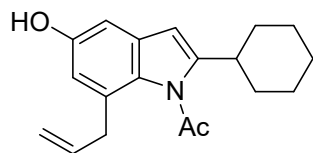

**46**

**1-(7-allyl-2-cyclohexyl-5-hydroxy-1*H*-indol-1-yl)ethan-1-one 46:** 10.5 mg, 71% yield. White solid, mp:166-167 °C. <sup>1</sup>H NMR (400 MHz, Chloroform-*d*) δ 7.54 (s, 1H), 6.90 (s, 1H), 6.32 (s, 1H), 6.05 (ddt, *J* = 17.6, 9.7, 6.3 Hz, 1H), 5.19-5.18 (m, 1H), 5.16-5.14 (m, 1H), 4.86 (s, 1H), 3.51 (d, *J* = 6.2 Hz, 2H), 3.27 (tt, *J* = 11.1, 2.8 Hz, 1H), 2.73 (s, 3H), 2.10-2.06 (m, 2H), 1.86-1.81 (m, 2H), 1.46-1.41 (m, 2H), 1.40-1.32 (m, 4H); <sup>13</sup>C NMR (101 MHz, CDCl<sub>3</sub>) δ 170.2, 150.4, 149.2, 136.7, 131.4, 129.9, 121.8, 116.5, 116.3, 106.2, 105.6, 38.0, 36.0, 33.9, 27.7, 26.6, 26.4; HRMS (m/z): [M+H]<sup>+</sup> calcd. for C<sub>19</sub>H<sub>24</sub>NO<sub>2</sub>, 298.1802; found, 298.1804.

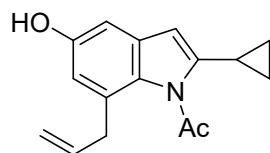

**47**

**1-(7-allyl-2-cyclopropyl-5-hydroxy-1*H*-indol-1-yl)ethan-1-one 47:** 10.8 mg, 70% yield. White solid, mp:152-153 °C. <sup>1</sup>H NMR (400 MHz, Chloroform-*d*) δ 8.14 (s, 1H), 6.85 (s, 1H), 6.23 (s, 1H), 6.05 (ddt, *J* = 16.6, 10.2, 6.2 Hz, 1H), 5.19-5.14 (m, 2H), 4.93 (s, 1H), 3.51 (d, *J* = 6.2 Hz, 2H), 2.82 (s, 3H), 2.08-2.01 (m, 1H), 1.08-1.03 (m, 2H), 0.87-0.83 (m, 2H); <sup>13</sup>C NMR (101 MHz, CDCl<sub>3</sub>) δ 170.4, 150.8, 142.4, 136.9, 132.4, 128.8, 122.7, 118.1, 116.4, 108.5, 105.7, 36.1, 27.0, 11.8, 8.5; HRMS (m/z): [M+H]<sup>+</sup> calcd. for C<sub>16</sub>H<sub>18</sub>NO<sub>2</sub>, 256.1332; found, 256.1330.

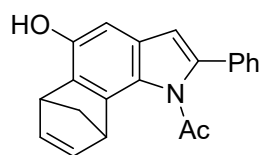

**48**

**1-(5-hydroxy-2-phenyl-6,9-dihydro-1*H*-6,9-methanobenzo[g]indol-1-yl)ethan-1-one 48:** 27.5 mg, 68% yield. Yellow oil. <sup>1</sup>H NMR (400 MHz, Chloroform-*d*) δ 7.44-7.39 (m, 5H), 7.01 (dd, *J* = 5.2, 3.2 Hz, 1H), 6.91 (dd, *J* = 5.1, 3.0 Hz, 1H), 6.61 (s, 1H), 6.46 (s, 1H), 4.77-4.75 (m, 1H), 4.70 (s, 1H), 4.19-4.18 (m, 1H) 2.29-2.23 (m, 2H), 2.02 (s, 3H); <sup>13</sup>C NMR (101 MHz, CDCl<sub>3</sub>) δ 171.1, 147.0, 143.8, 143.2, 140.7, 140.5, 136.5, 134.5, 129.3, 128.8, 128.8, 128.7, 128.5, 112.1, 103.0, 69.0, 52.4, 46.5, 28.0; HRMS (m/z): [M+H]<sup>+</sup> calcd. for C<sub>21</sub>H<sub>18</sub>NO<sub>2</sub>, 316.1332; found, 316.1332.

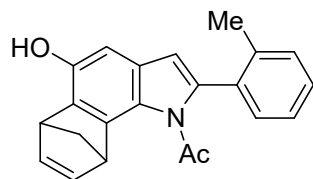

**49**

**1-(5-hydroxy-2-(*o*-tolyl)-6,9-dihydro-1H-6,9-methanobenzo[g]indol-1-yl)ethan-1-one 49:** 8.6 mg, 62% yield. Yellow oil.  $^1\text{H}$  NMR (400 MHz, Chloroform-*d*)  $\delta$  7.36-7.27 (m, 4H), 7.03 (dd,  $J = 5.2, 3.1$  Hz, 1H), 6.91 (dd,  $J = 5.2, 2.9$  Hz, 1H), 6.60 (s, 1H), 6.33 (s, 1H), 4.69-4.67 (m, 1H), 4.21-4.19 (m, 1H), 2.27-2.21 (m, 5H), 1.88 (s, 3H);  $^{13}\text{C}$  NMR (101 MHz,  $\text{CDCl}_3$ )  $\delta$  170.4, 147.1, 143.8, 143.3, 141.1, 138.9, 137.5, 136.3, 134.2, 130.5, 130.4, 129.4, 129.1, 127.9, 126.0, 111.6, 102.8, 68.7, 52.6, 46.5, 26.4, 20.1; HRMS ( $m/z$ ):  $[\text{M}+\text{H}]^+$  calcd. for  $\text{C}_{22}\text{H}_{20}\text{NO}_2$ , 330.1489; found, 330.1490.

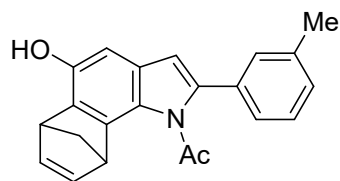

**50**

**1-(5-hydroxy-2-(*m*-tolyl)-6,9-dihydro-1H-6,9-methanobenzo[g]indol-1-yl)ethan-1-one 50:** 5.4 mg, 60% yield. Yellow oil.  $^1\text{H}$  NMR (400 MHz, Chloroform-*d*)  $\delta$  7.32 (t,  $J = 7.5$  Hz, 1H), 7.26-7.19 (m, 3H), 7.00 (dd,  $J = 5.3, 3.2$  Hz, 1H), 6.90 (dd,  $J = 5.3, 2.9$  Hz, 1H), 6.60 (s, 1H), 6.44 (s, 1H), 4.90 (s, 1H), 4.78-4.76 (m, 1H), 4.20-4.18 (m, 1H), 2.40 (s, 3H), 2.28-2.22 (m, 2H), 2.03 (s, 3H);  $^{13}\text{C}$  NMR (101 MHz,  $\text{CDCl}_3$ )  $\delta$  171.2, 147.0, 143.9, 143.2, 140.7, 140.7, 138.5, 136.4, 134.4, 129.3, 129.3, 129.2, 128.8, 128.6, 125.9, 111.9, 103.0, 69.0, 52.4, 46.5, 28.0, 21.4; HRMS ( $m/z$ ):  $[\text{M}+\text{H}]^+$  calcd. for  $\text{C}_{22}\text{H}_{20}\text{NO}_2$ , 330.1489; found, 330.1487.

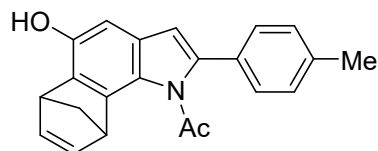

**51**

**1-(5-hydroxy-2-(*p*-tolyl)-6,9-dihydro-1H-6,9-methanobenzo[g]indol-1-yl)ethan-1-one 51:** 7.1 mg, 66% yield. Yellow oil.  $^1\text{H}$  NMR (400 MHz, Chloroform-*d*)  $\delta$  7.33 (d,  $J = 8.0$  Hz, 2H), 7.24 (d,  $J = 7.8$  Hz, 2H), 7.00 (dd,  $J = 5.2, 3.2$  Hz, 1H), 6.90 (dd,  $J = 5.3, 3.0$  Hz, 1H), 6.59 (s, 1H), 6.42 (s, 1H), 4.76-4.74 (m, 1H), 4.19-4.17 (m, 1H), 2.41 (s, 3H), 2.28-2.21 (m, 2H), 2.02 (s, 3H);  $^{13}\text{C}$  NMR (101 MHz,  $\text{CDCl}_3$ )  $\delta$  171.1, 146.9, 143.8, 143.1, 140.7, 138.5, 136.2, 131.6, 129.4, 129.4, 128.8, 128.7, 111.6, 102.8, 69.0, 52.4, 46.5, 28.0, 21.3; HRMS ( $m/z$ ):  $[\text{M}+\text{H}]^+$  calcd. for  $\text{C}_{22}\text{H}_{20}\text{NO}_2$ , 330.1489; found, 330.1491.

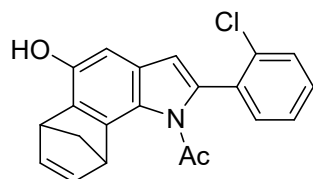

**52**

**1-(2-(2-chlorophenyl)-5-hydroxy-6,9-dihydro-1H-6,9-methanobenzo[g]indol-1-yl)ethan-1-one 52:** 5.4 mg, 64% yield. Yellow oil.  $^1\text{H}$  NMR (400 MHz, Chloroform-*d*)  $\delta$  7.49 (dd,  $J = 7.6, 1.7$  Hz, 1H),

7.44-7.37 (m, 3H), 7.04 (dd,  $J = 5.3, 3.2$  Hz, 1H), 6.91 (dd,  $J = 5.3, 3.0$  Hz, 1H), 6.62 (s, 1H), 6.43 (s, 1H), 4.76 (s, 1H), 4.70-4.68 (m, 1H), 4.20-4.19 (m, 1H), 2.28-2.23 (m, 2H), 2.01 (s, 3H);  $^{13}\text{C}$  NMR (101 MHz,  $\text{CDCl}_3$ )  $\delta$  169.8, 147.0, 143.8, 143.2, 141.1, 136.8, 136.4, 133.9, 131.9, 130.4, 130.3, 129.9, 129.9, 129.1, 127.0, 112.7, 103.0, 68.8, 52.6, 46.5, 26.1; HRMS ( $m/z$ ):  $[\text{M}+\text{H}]^+$  calcd. for  $\text{C}_{21}\text{H}_{17}\text{ClNO}_2$ , 350.0942; found, 350.0945.

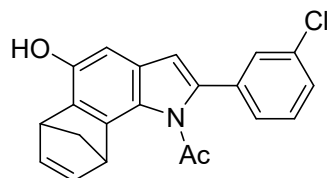

**53**

**1-(2-(3-chlorophenyl)-5-hydroxy-6,9-dihydro-1H-6,9-methanobenzo[g]indol-1-yl)ethan-1-one 53:** 7.9 mg, 60% yield. Yellow oil.  $^1\text{H}$  NMR (400 MHz, Chloroform- $d$ )  $\delta$  7.48-7.47 (m, 1H), 7.38-7.31 (m, 3H), 7.00 (dd,  $J = 5.2, 3.2$  Hz, 1H), 6.90 (dd,  $J = 5.3, 3.0$  Hz, 1H), 6.61 (s, 1H), 6.49 (s, 1H), 4.93 (s, 1H), 4.77-4.75 (m, 1H), 4.21-4.19 (m, 1H), 2.29-2.22 (m, 2H), 2.06 (s, 3H);  $^{13}\text{C}$  NMR (101 MHz,  $\text{CDCl}_3$ )  $\delta$  170.6, 147.1, 143.8, 143.1, 140.9, 138.9, 137.1, 136.9, 136.2, 134.8, 130.0, 129.0, 128.5, 128.5, 126.8, 112.9, 103.2, 69.1, 52.4, 46.6, 28.1; HRMS ( $m/z$ ):  $[\text{M}+\text{H}]^+$  calcd. for  $\text{C}_{21}\text{H}_{17}\text{ClNO}_2$ , 350.0942; found, 350.0944.

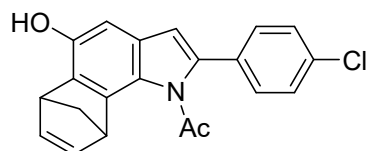

**54**

**1-(2-(4-chlorophenyl)-5-hydroxy-6,9-dihydro-1H-6,9-methanobenzo[g]indol-1-yl)ethan-1-one 54:** 6.8 mg, 68% yield. Yellow oil.  $^1\text{H}$  NMR (400 MHz, Chloroform- $d$ )  $\delta$  7.43 (d,  $J = 8.8$  Hz, 2H), 7.39 (d,  $J = 8.6$  Hz, 2H), 7.00 (dd,  $J = 5.3, 3.1$  Hz, 1H), 6.90 (dd,  $J = 5.2, 3.0$  Hz, 1H), 6.61 (s, 1H), 6.46 (s, 1H), 4.75-4.74 (m, 1H), 4.20-4.17 (m, 1H), 2.29-2.22 (m, 2H), 2.04 (s, 3H);  $^{13}\text{C}$  NMR (101 MHz,  $\text{CDCl}_3$ )  $\delta$  170.7, 147.0, 143.8, 143.1, 140.8, 139.2, 136.8, 134.6, 132.9, 129.9, 129.1, 129.0, 129.0, 112.5, 103.0, 69.1, 52.4, 46.5, 28.1; HRMS ( $m/z$ ):  $[\text{M}+\text{H}]^+$  calcd. for  $\text{C}_{21}\text{H}_{17}\text{ClNO}_2$ , 350.0942; found, 350.0941.

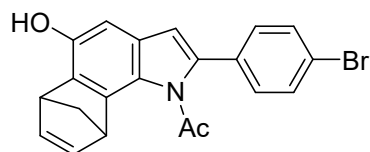

**55**

**1-(2-(4-bromophenyl)-5-hydroxy-6,9-dihydro-1H-6,9-methanobenzo[g]indol-1-yl)ethan-1-one 55:** 6.3 mg, 63% yield. Yellow oil.  $^1\text{H}$  NMR (400 MHz, Chloroform- $d$ )  $\delta$  7.58 (d,  $J = 8.4$  Hz, 2H), 7.33 (d,  $J = 8.4$  Hz, 2H), 7.00 (dd,  $J = 5.3, 3.1$  Hz, 1H), 6.90 (dd,  $J = 5.2, 3.0$  Hz, 1H), 6.61 (s, 1H), 6.46 (s, 1H), 4.74-4.76 (m, 1H), 4.63 (s, 1H), 4.19-4.17 (m, 1H), 2.29-2.21 (m, 2H), 2.05 (s, 3H);  $^{13}\text{C}$  NMR (101 MHz,  $\text{CDCl}_3$ )  $\delta$  170.6, 147.0, 143.8, 143.1, 140.8, 136.8, 133.4, 132.0, 130.2, 130.1, 129.1, 122.7, 112.5, 103.1, 69.1, 52.4, 46.5, 28.2; HRMS ( $m/z$ ):  $[\text{M}+\text{H}]^+$  calcd. for  $\text{C}_{21}\text{H}_{17}\text{BrNO}_2$ , 394.0437; found, 394.0438.



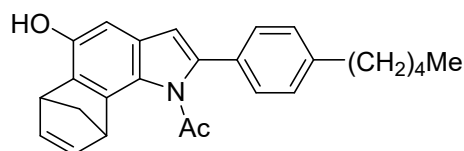

**56**

**1-(5-hydroxy-2-(4-pentylphenyl)-6,9-dihydro-1H-6,9-methanobenzo[g]indol-1-yl)ethan-1-one**

**56:** 6.7 mg, 63% yield. Yellow oil.  $^1\text{H}$  NMR (400 MHz, Chloroform-*d*)  $\delta$  7.34 (d,  $J = 8.1$  Hz, 2H), 7.24 (d,  $J = 8.0$  Hz, 2H), 7.00 (dd,  $J = 5.3, 3.1$  Hz, 1H), 6.90 (dd,  $J = 5.2, 3.0$  Hz, 1H), 6.59 (s, 1H), 6.43 (s, 1H), 4.76-4.74 (m, 1H), 4.72 (s, 1H), 4.19-4.18 (m, 1H), 2.67-2.63 (m, 2H), 2.28-2.22 (m, 2H), 2.02 (s, 3H), 1.65 (p,  $J = 7.5$  Hz, 2H), 1.37-1.33 (m, 4H), 0.91 (t,  $J = 6.8$  Hz, 3H);  $^{13}\text{C}$  NMR (101 MHz,  $\text{CDCl}_3$ )  $\delta$  171.1, 146.9, 143.8, 143.6, 143.1, 140.7, 140.6, 136.2, 131.7, 129.4, 128.7, 128.7, 111.6, 102.8, 69.0, 52.4, 46.5, 35.7, 31.5, 31.0, 28.0, 22.5, 14.0; HRMS ( $m/z$ ):  $[\text{M}+\text{H}]^+$  calcd. for  $\text{C}_{26}\text{H}_{28}\text{BrNO}_2$ , 386.2115; found, 386.2117.

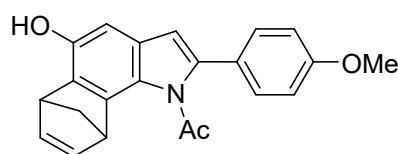

**57**

**1-(5-hydroxy-2-(4-methoxyphenyl)-6,9-dihydro-1H-6,9-methanobenzo[g]indol-1-yl)ethan-1-one**

**57:** 4.6 mg, 56% yield. Yellow oil.  $^1\text{H}$  NMR (400 MHz, Chloroform-*d*)  $\delta$  7.36 (d,  $J = 8.7$  Hz, 2H), 7.00 (dd,  $J = 5.3, 3.2$  Hz, 1H), 6.97 (d,  $J = 8.7$  Hz, 2H), 6.90 (dd,  $J = 5.2, 3.0$  Hz, 1H), 4.75-4.73 (m, 1H), 4.65 (s, 1H), 4.19-4.17 (m, 1H), 3.86 (s, 3H), 2.28-2.20 (m, 2H), 2.02 (s, 3H);  $^{13}\text{C}$  NMR (101 MHz,  $\text{CDCl}_3$ )  $\delta$  168.6, 146.9, 143.8, 143.1, 140.4, 134.9, 130.2, 130.1, 126.8, 125.6, 114.4, 114.1, 111.3, 105.4, 102.7, 68.9, 55.4, 52.4, 46.5, 27.9; HRMS ( $m/z$ ):  $[\text{M}+\text{H}]^+$  calcd. for  $\text{C}_{22}\text{H}_{20}\text{NO}_3$ , 346.1438; found, 346.1438.

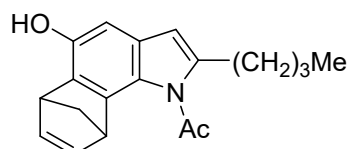

**58**

**1-(2-butyl-5-hydroxy-6,9-dihydro-1H-6,9-methanobenzo[g]indol-1-yl)ethan-1-one**

**58:** 7.8 mg, 70% yield. Colorless oil.  $^1\text{H}$  NMR (400 MHz, Chloroform-*d*)  $\delta$  6.97-6.92 (m, 2H), 6.52 (s, 1H), 6.21 (s, 1H), 4.76 (s, 1H), 4.35-4.33 (m, 1H), 4.19-4.16 (m, 1H), 2.86-2.79 (m, 2H), 2.62 (s, 3H), 2.27-2.25 (m, 1H), 2.16-2.13 (m, 1H), 1.71-1.66 (m, 2H), 1.44 (h,  $J = 7.4$  Hz, 2H), 0.96 (t,  $J = 7.4$  Hz, 3H);  $^{13}\text{C}$  NMR (101 MHz,  $\text{CDCl}_3$ )  $\delta$  170.8, 146.6, 144.0, 142.1, 141.7, 139.4, 134.4, 129.7, 127.9, 107.5, 102.3, 69.2, 51.7, 46.4, 31.1, 29.6, 27.0, 22.5, 13.9; HRMS ( $m/z$ ):  $[\text{M}+\text{H}]^+$  calcd. for  $\text{C}_{19}\text{H}_{22}\text{NO}_2$ , 296.1645; found, 296.1642.

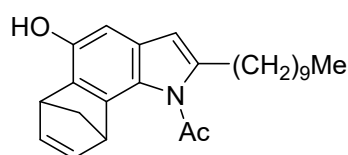

**59**

**1-(2-decyl-5-hydroxy-6,9-dihydro-1H-6,9-methanobenzo[g]indol-1-yl)ethan-1-one**

**59:** 5.4 mg, 60% yield. Yellow oil.  $^1\text{H}$  NMR (400 MHz, Chloroform-*d*)  $\delta$  6.97-6.92 (m, 2H), 6.52 (s, 1H), 6.21 (s,

1H), 4.35-4.33 (m, 1H), 4.18-4.16 (m, 1H), 2.85-2.78 (m, 2H), 2.61 (s, 3H), 2.27-2.24 (m, 1H), 2.16-2.13 (m, 1H), 1.73-1.65 (m, 2H), 1.33-1.27 (m, 14H), 0.88 (t,  $J = 6.8$  Hz, 3H);  $^{13}\text{C}$  NMR (101 MHz,  $\text{CDCl}_3$ )  $\delta$  170.8, 149.7, 149.0, 146.6, 146.6, 144.0, 142.1, 141.8, 129.7, 127.9, 107.4, 102.3, 69.2, 51.7, 46.4, 31.9, 29.9, 29.6, 29.6, 29.5, 29.3, 29.0, 27.0, 22.7, 14.1; HRMS ( $m/z$ ):  $[\text{M}+\text{H}]^+$  calcd. for  $\text{C}_{25}\text{H}_{34}\text{NO}_2$ , 380.2584; found, 380.2585.

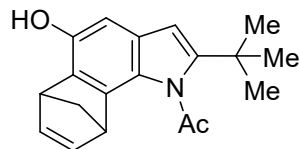

**60**

**1-(2-(tert-butyl)-5-hydroxy-6,9-dihydro-1H-6,9-methanobenzo[g]indol-1-yl)ethan-1-one 60:** 6.1 mg, 62% yield. Colorless oil.  $^1\text{H}$  NMR (400 MHz, Chloroform- $d$ )  $\delta$  6.98 (dd,  $J = 5.4, 3.1$  Hz, 1H), 6.89 (dd,  $J = 5.3, 2.9$  Hz, 1H), 6.58 (s, 1H), 6.23 (s, 1H), 4.67 (s, 1H), 4.22-4.20 (m, 1H), 4.07-4.09 (m, 1H), 2.57 (s, 3H), 2.34-2.31 (m, 1H), 2.18-2.21 (m, 1H), 1.42 (s, 9H);  $^{13}\text{C}$  NMR (101 MHz,  $\text{CDCl}_3$ )  $\delta$  176.4, 151.0, 146.1, 145.0, 140.6, 140.6, 136.8, 133.6, 128.6, 103.4, 102.4, 70.8, 50.1, 46.6, 33.5, 30.1, 29.0; HRMS ( $m/z$ ):  $[\text{M}+\text{H}]^+$  calcd. for  $\text{C}_{19}\text{H}_{22}\text{NO}_2$ , 296.1645; found, 296.1644.

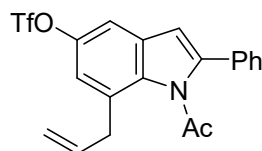

**61**

**1-acetyl-7-allyl-2-phenyl-1H-indol-5-yl trifluoromethanesulfonate 61:** 30.7 mg, 94% yield. Colorless oil.  $^1\text{H}$  NMR (400 MHz, Chloroform- $d$ )  $\delta$  8.35 (s, 1H), 7.49-7.44 (m, 6H), 6.61 (s, 1H), 6.00 (ddt,  $J = 17.7, 9.3, 6.5$  Hz, 1H), 5.18-5.14 (m, 2H), 3.60 (d,  $J = 6.5$  Hz, 2H), 2.05 (s, 3H);  $^{13}\text{C}$  NMR (101 MHz,  $\text{CDCl}_3$ )  $\delta$  171.4, 144.4, 141.5, 136.7, 135.2, 133.4, 129.5, 129.1, 129.0, 128.9, 128.2, 118.7 (q,  $J = 320.2$  Hz), 118.2, 117.1, 112.6, 110.6, 35.0, 27.8; HRMS ( $m/z$ ):  $[\text{M}+\text{H}]^+$  calcd. for  $\text{C}_{20}\text{H}_{17}\text{F}_3\text{NO}_4\text{S}$ , 424.0825; found, 424.0823.

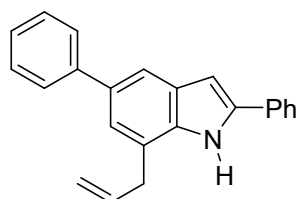

**62**

**7-allyl-2,5-diphenyl-1H-indole 62:** 7.5 mg, 83% yield. White solid, mp:171-172 °C.  $^1\text{H}$  NMR (400 MHz, Chloroform- $d$ )  $\delta$  8.27 (s, 1H), 7.67-7.65 (m, 2H), 7.48 (s, 1H), 7.46-7.40 (m, 4H), 7.39 (s, 1H), 7.38 (s, 1H), 7.36-7.31 (m, 4H), 6.80-6.79 (m, 1H), 5.93 (ddt,  $J = 16.7, 10.1, 6.5$  Hz, 1H), 5.01 (dd,  $J = 10.1, 1.8$  Hz, 1H), 4.95 (dd,  $J = 17.0, 1.7$  Hz, 1H), 3.42 (d,  $J = 6.4$  Hz, 2H);  $^{13}\text{C}$  NMR (101 MHz,  $\text{CDCl}_3$ )  $\delta$  142.8, 138.3, 138.3, 136.7, 135.2, 132.5, 132.2, 129.9, 129.1, 127.9, 127.7, 127.7, 126.4, 125.1, 121.8, 115.5, 111.3, 99.9, 38.1; HRMS ( $m/z$ ):  $[\text{M}+\text{H}]^+$  calcd. for  $\text{C}_{23}\text{H}_{20}\text{N}$ , 310.1590; found, 310.1590.

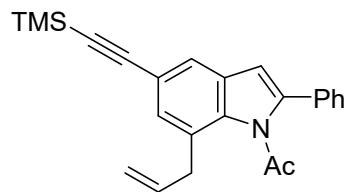

**63**

**1-(7-allyl-2-phenyl-5-((trimethylsilyl)ethynyl)-1H-indol-1-yl)ethan-1-one 63:** 8.5 mg, 79% yield. White solid, mp: 171-172 °C.  $^1\text{H}$  NMR (400 MHz, Chloroform-*d*)  $\delta$  8.21 (s, 1H), 7.67 (s, 1H), 7.48-7.41 (m, 6H), 6.54 (s, 1H), 6.05 (ddt,  $J = 16.8, 10.0, 6.7$  Hz, 1H), 5.15 (dd,  $J = 17.0, 1.8$  Hz, 1H), 5.08 (dd,  $J = 10.0, 1.8$  Hz, 1H), 3.69 (d,  $J = 6.7$  Hz, 2H), 2.05 (s, 3H), 0.27 (s, 9H);  $^{13}\text{C}$  NMR (101 MHz,  $\text{CDCl}_3$ )  $\delta$  171.4, 140.2, 139.8, 137.9, 136.9, 133.9, 128.9, 128.8, 128.7, 127.2, 124.6, 118.3, 116.1, 115.8, 111.0, 104.4, 96.9, 39.5, 27.9, 0.1; HRMS ( $m/z$ ):  $[\text{M}+\text{H}]^+$  calcd. for  $\text{C}_{24}\text{H}_{26}\text{NOSi}$ , 372.1778; found, 372.1775.

C70. 1. 1. 1r  
1H

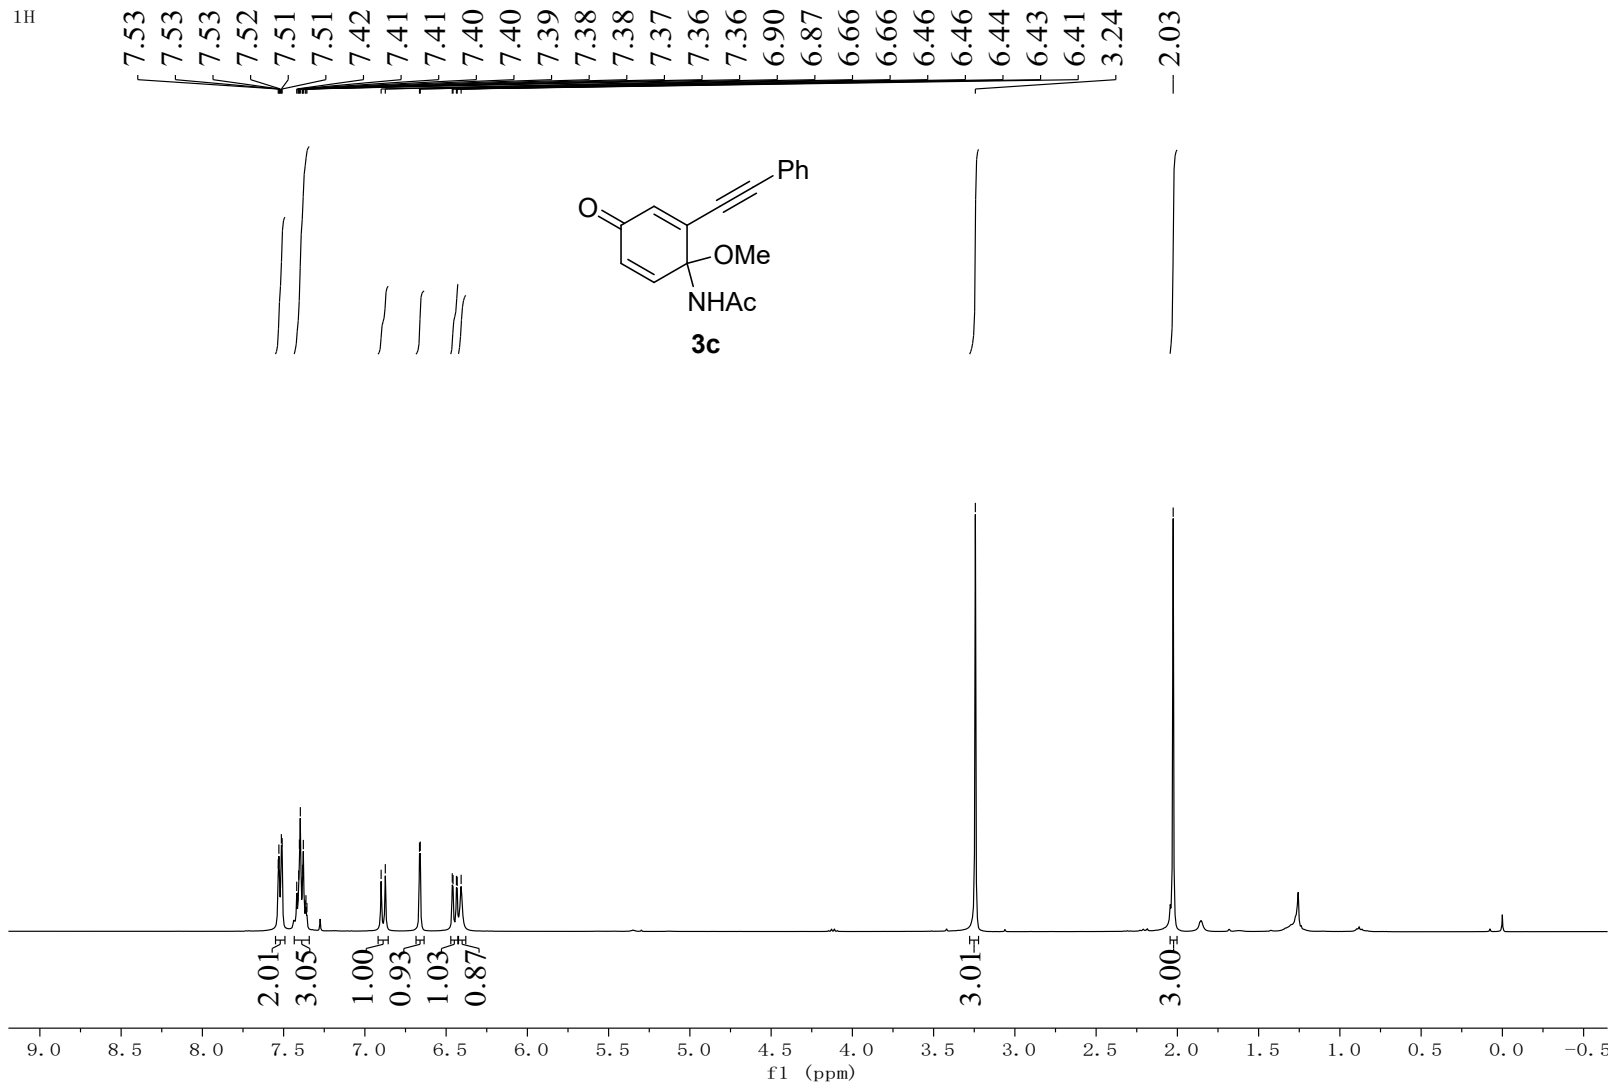

C67-C. 1. 1. 1r  
13C

— 184.61

— 168.88

144.53

138.94

134.59

132.15

130.96

129.89

128.62

121.54

— 100.95

~ 84.06

~ 80.53

— 51.05

— 23.64

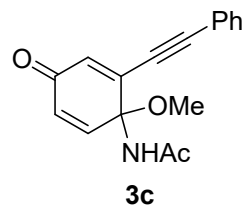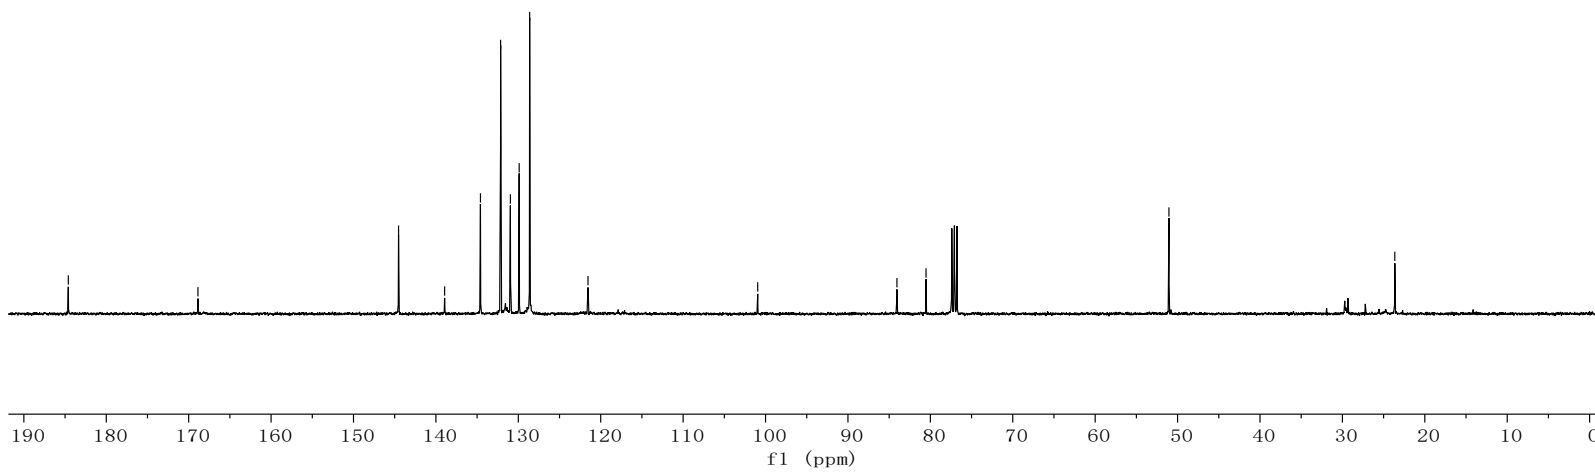

C-BZ-[0]. 1. 1. 1r

<sup>1</sup>H

7.82  
7.80  
7.52  
7.50  
7.50  
7.45  
7.43  
7.43  
7.37  
7.37  
7.36  
7.36  
7.34  
7.32  
6.96  
6.94  
6.91  
6.72  
6.72  
6.53  
6.53  
6.51  
6.50  
3.31

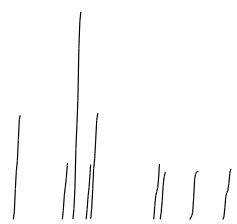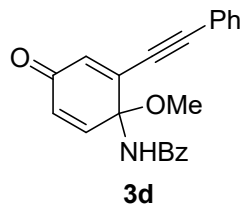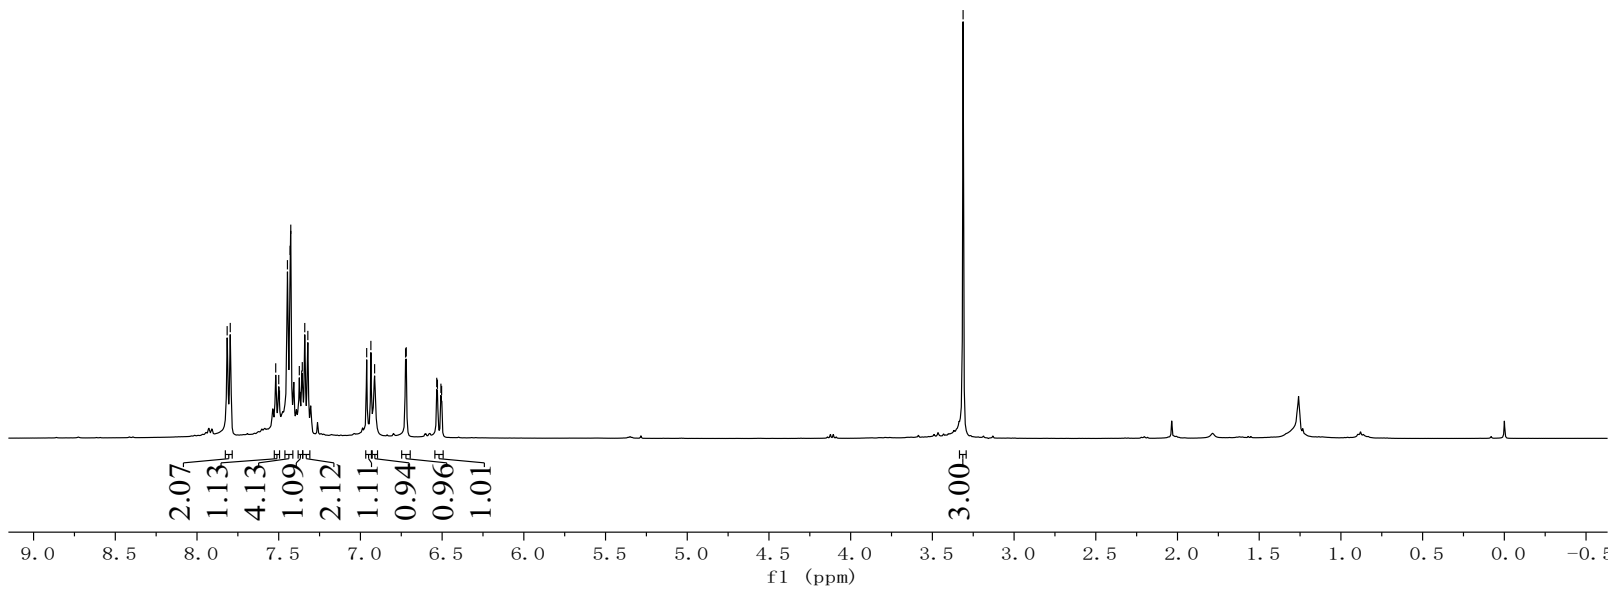

C-BZ-[0]-C. 1. 1. 1r  
13C

— 184.57

— 165.78

144.41

138.90

134.70

133.53

132.21

132.10

131.29

129.82

128.78

128.57

127.09

121.52

— 101.08

~ 84.12

~ 81.05

— 51.11

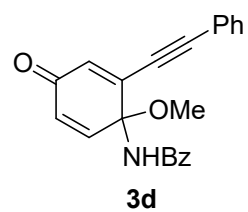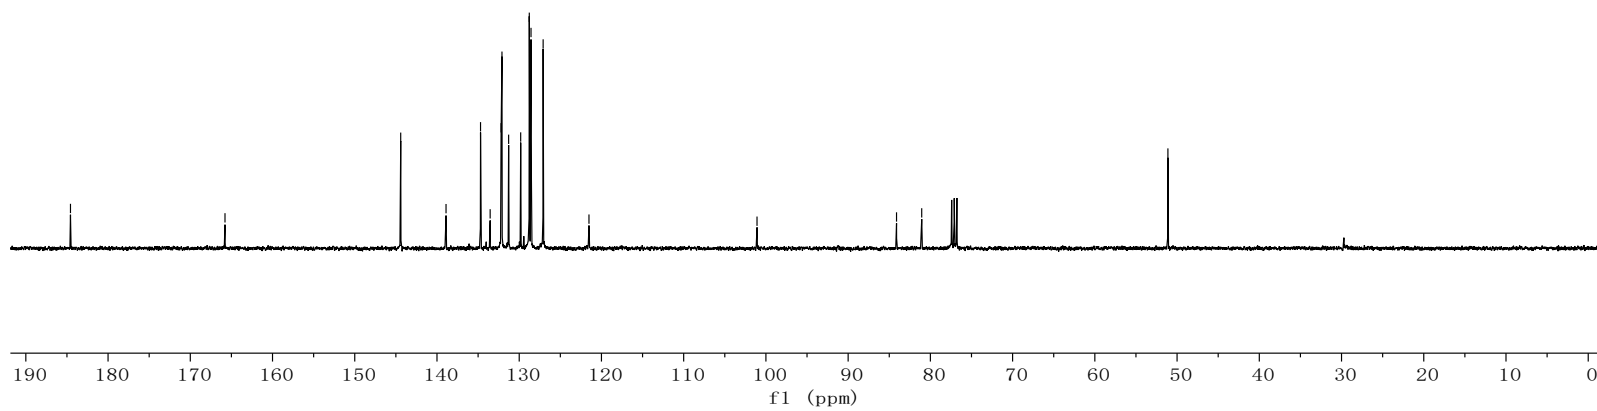

C-Boc[0]. 1. 1. 1r

<sup>1</sup>H

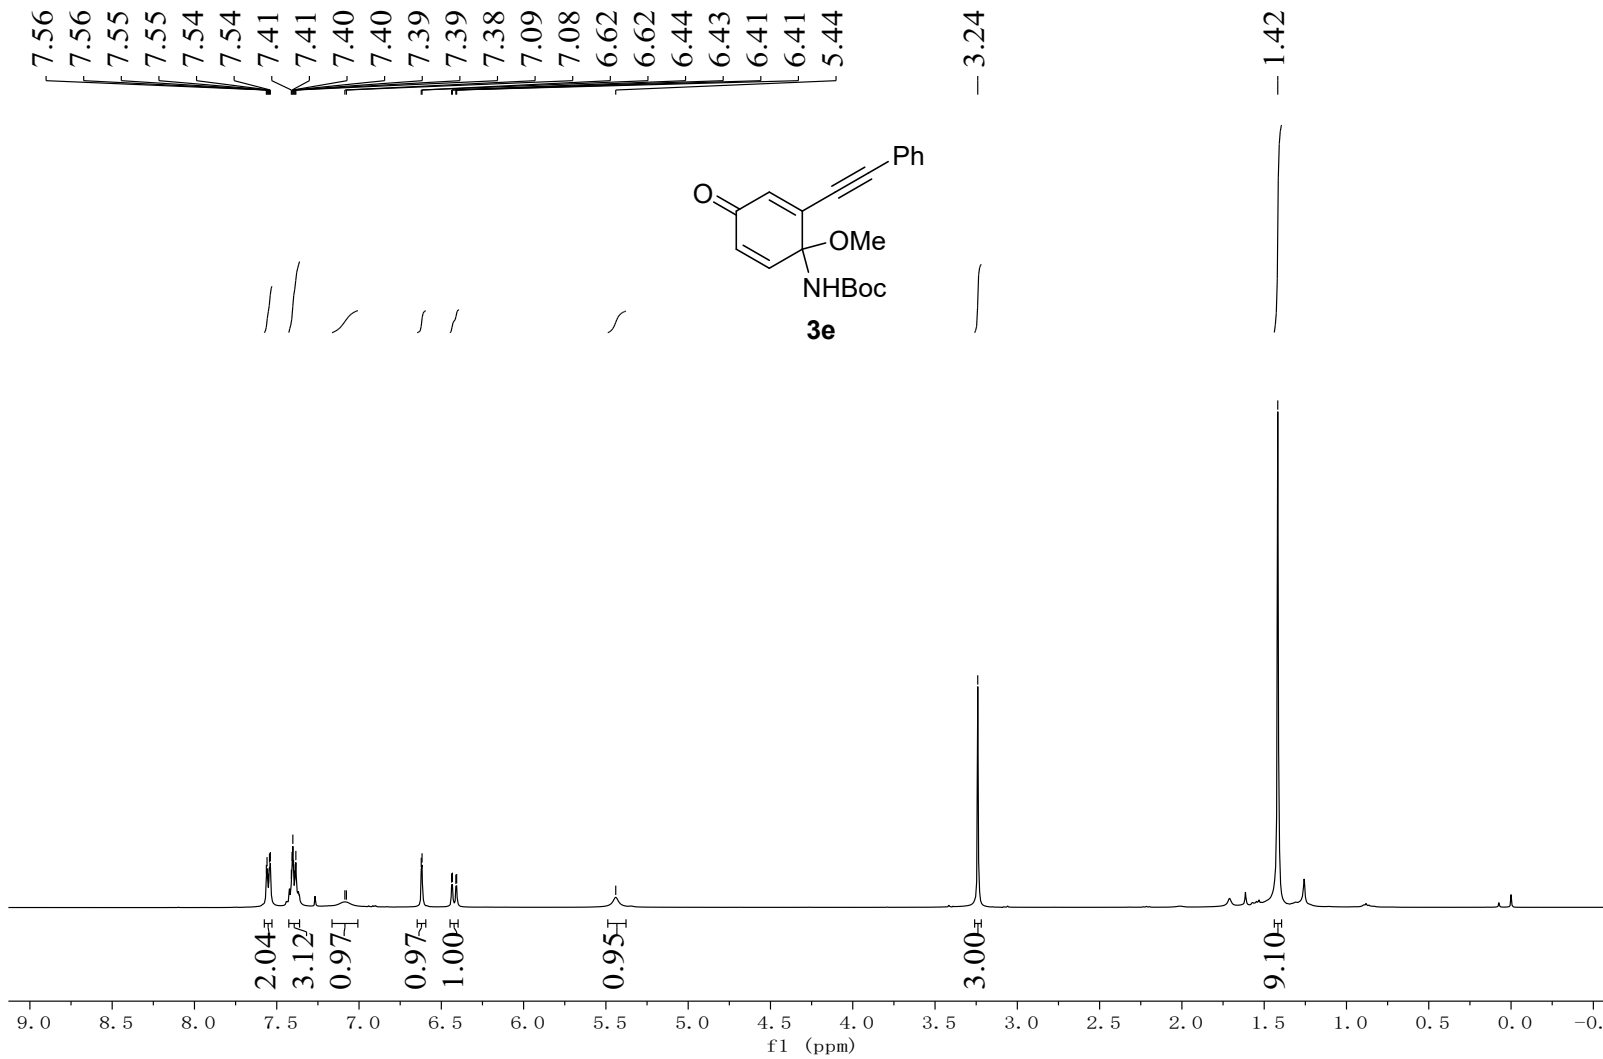



C-Boc[0]-C. 1. 1. 1r  
13C

- 184.58

- 153.00

- 144.92

133.98

132.22

130.44

129.89

128.59

121.55

- 101.37

83.96

81.08

80.16

- 51.32

- 28.22

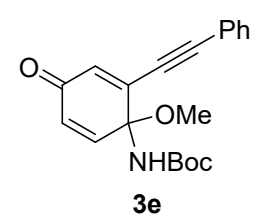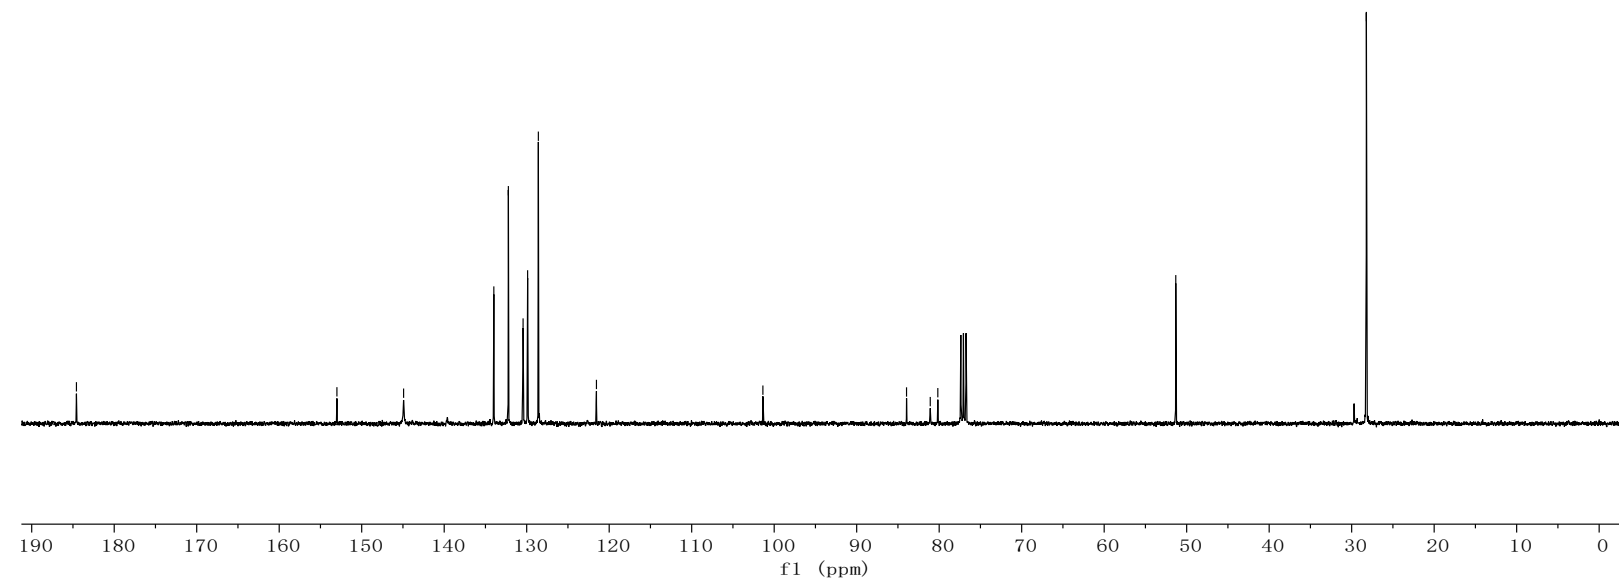

C-2Me[O]-NEW. 1. 1. 1r

C-2Me[O]-NEW

7.49  
7.47  
7.33  
7.31  
7.29  
7.27  
7.26  
7.24  
7.21  
7.20  
7.18  
6.90  
6.88  
6.66  
6.65  
6.46  
6.46  
6.43  
6.43  
6.40

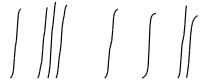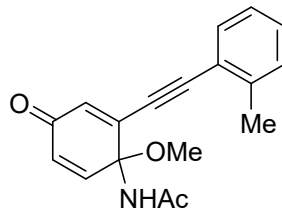

4

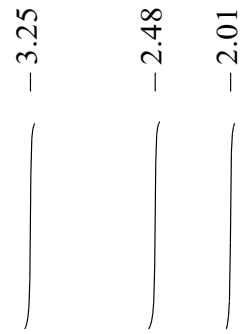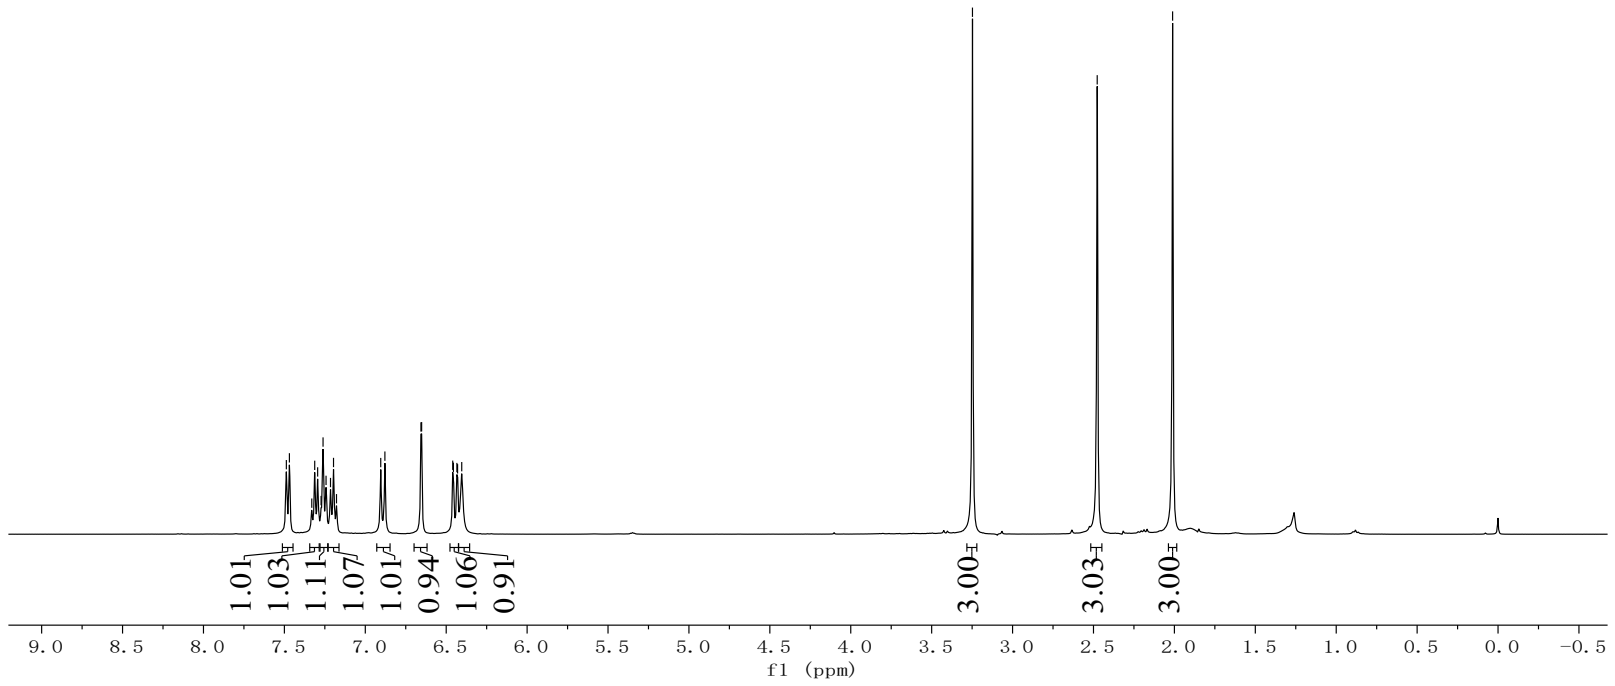

C-2Me[0]-C. 1. 1. 1r  
C-2Me[0]-C

- 184.62
- 168.74
- 144.51
- 140.91
- 139.11
- 134.22
- 132.41
- 130.99
- 129.99
- 129.77
- 125.90
- 121.41
- 100.06
- 88.03
- 80.58
- 51.01
- ~ 23.61
- ~ 20.69

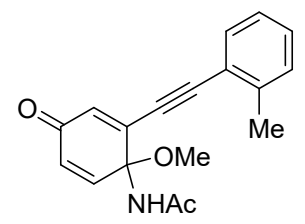

4

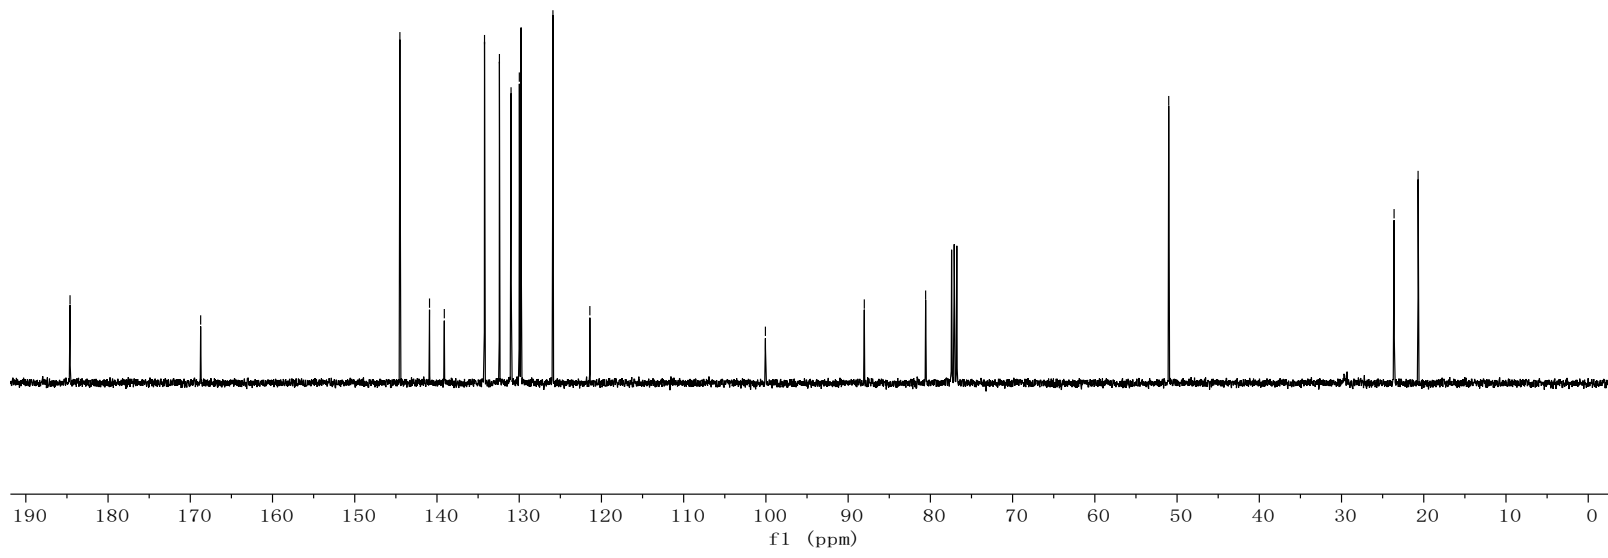

C-3Me[O]-NEW. 1. 1. 1r

C-3Me[O]-NEW

7.33  
7.31  
7.28  
7.26  
7.24  
7.22  
7.21  
6.89  
6.86  
6.65  
6.64  
6.57  
6.45  
6.44  
6.42  
6.42

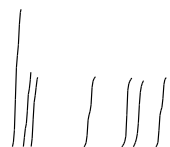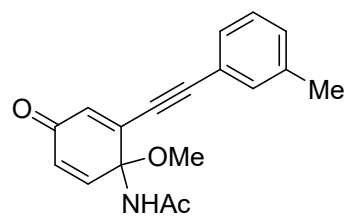

5

3.23  
2.35  
2.02

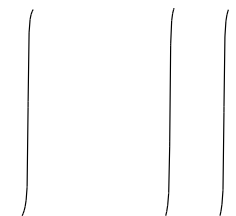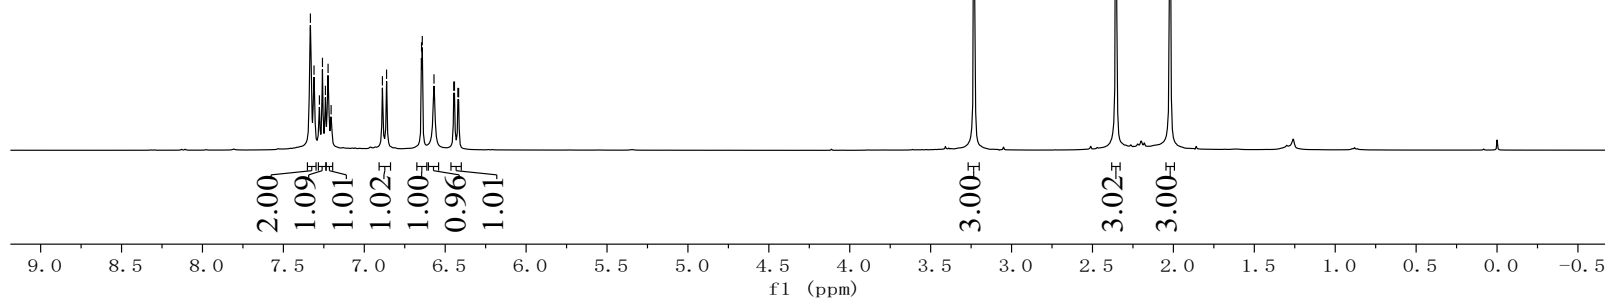

C-3Me[0]-C. 1. 1. 1r  
C-3Me[0]-C

- 184.68

- 168.97

144.67

139.18

138.39

134.40

132.62

130.86

130.80

129.28

128.51

121.37

- 101.30

~ 83.85

~ 80.56

- 50.97

~ 23.56

~ 21.20

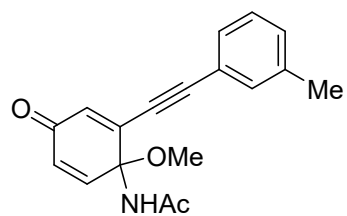

5

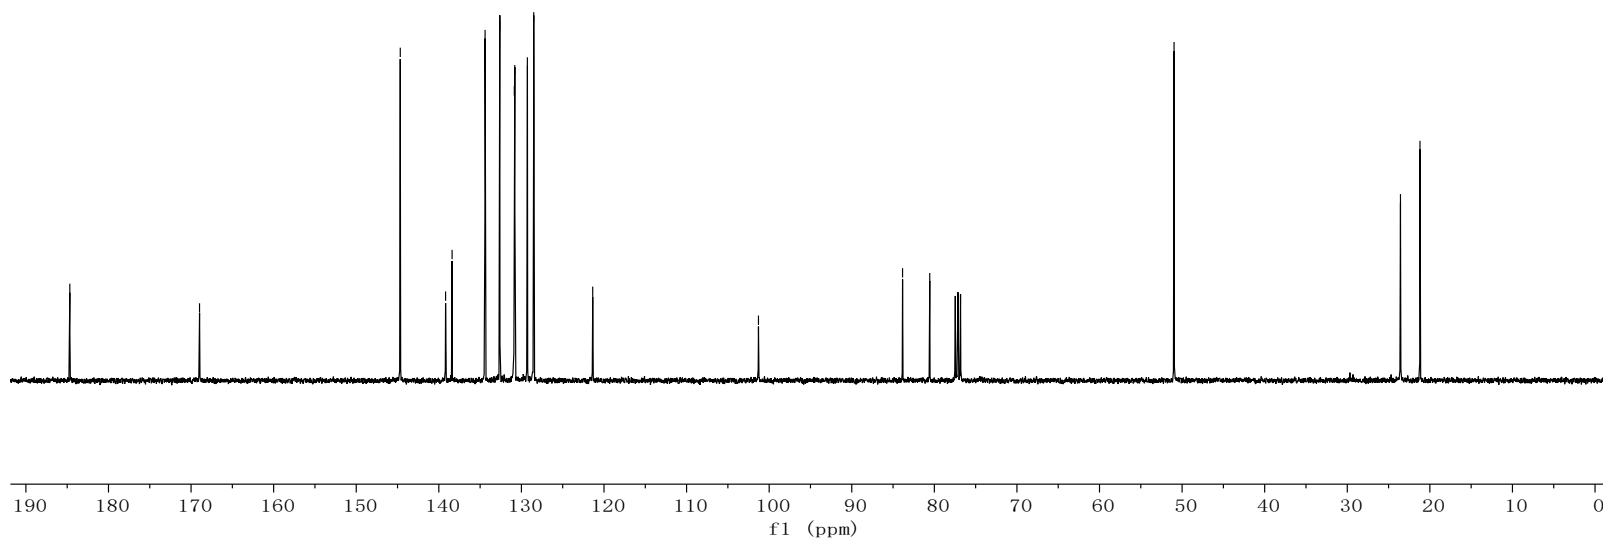

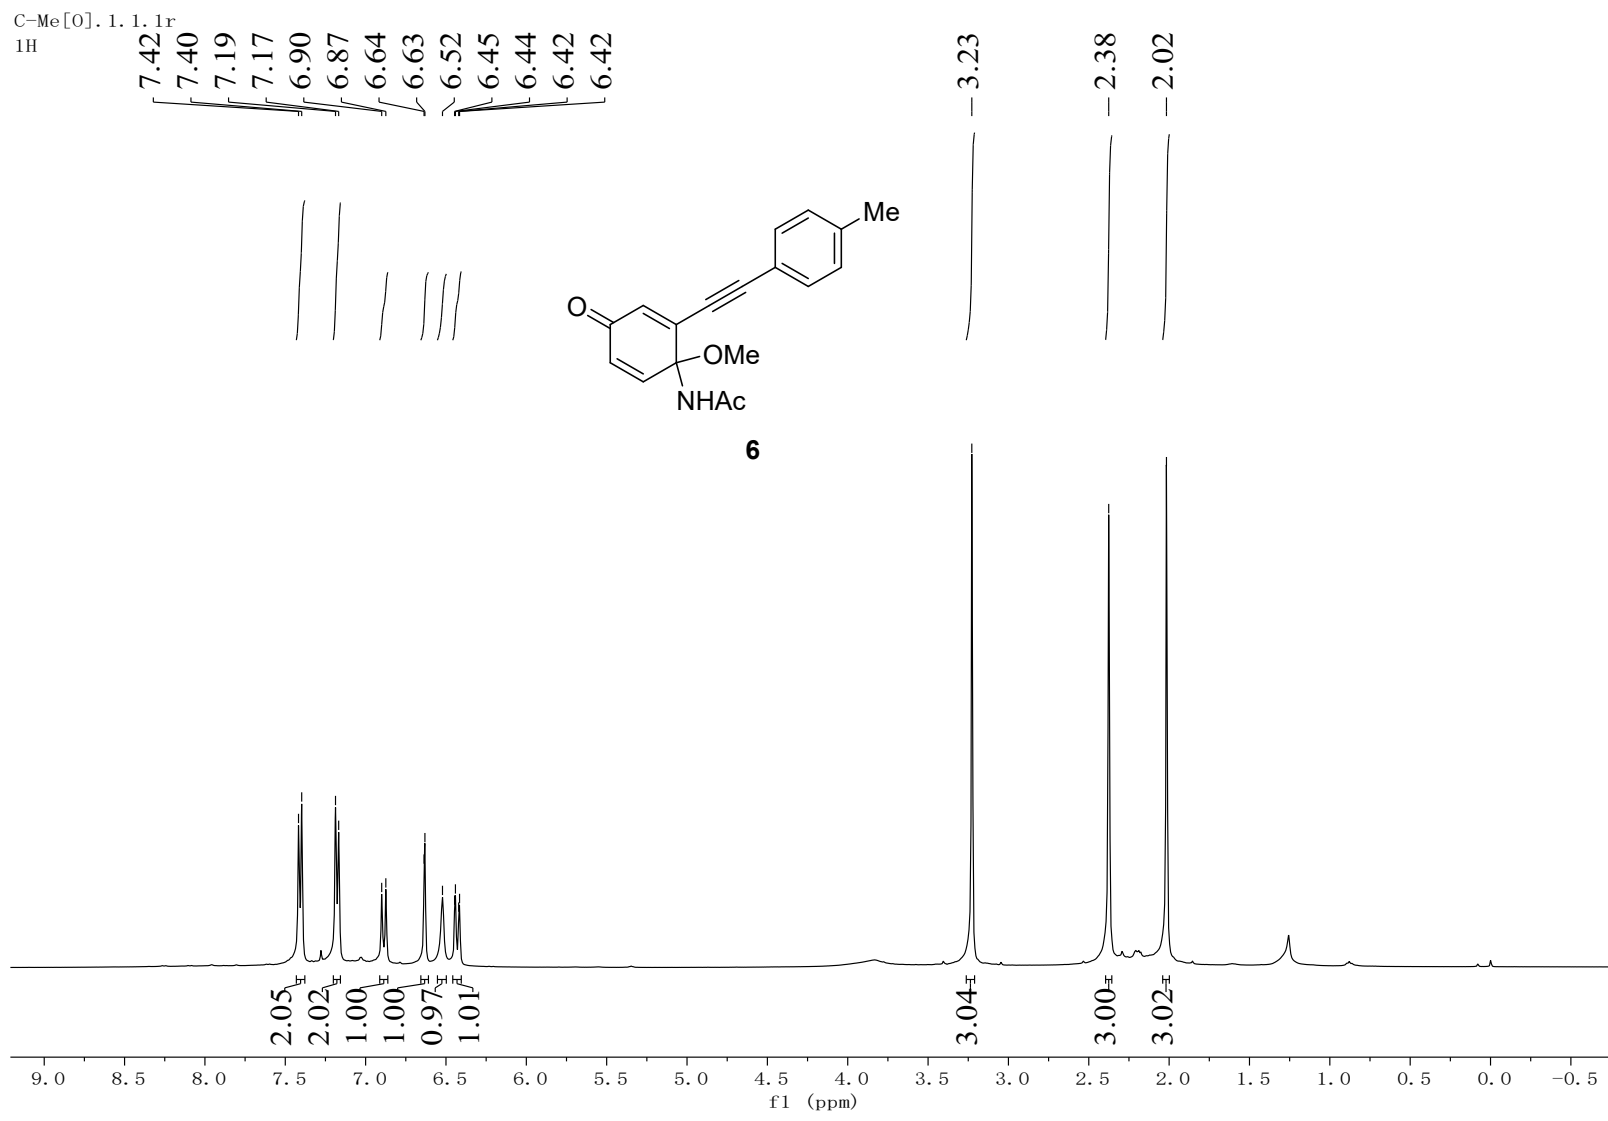

C-Me[0]-C. 1. 1. 1r  
13C

- 184.7

- 169.0

144.6

140.4

139.2

134.2

132.1

130.9

129.4

118.5

- 101.5

~ 83.7

~ 80.5

- 51.0

~ 23.6

~ 21.7

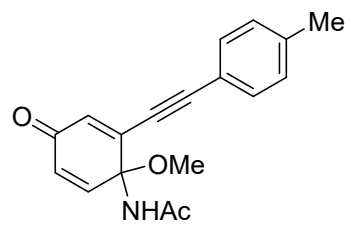

6

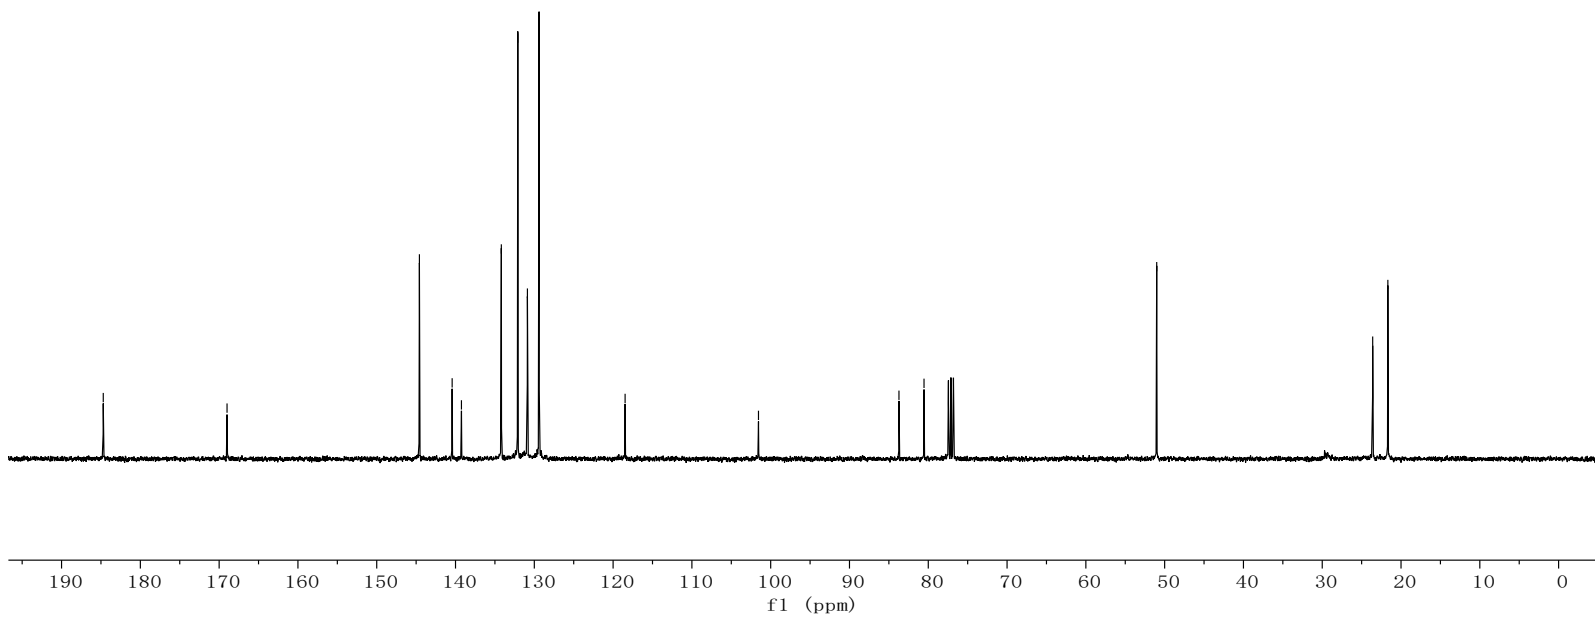

C-W[0]. 1. 1. 1r  
1H

7.44  
7.42  
7.20  
7.18  
6.93  
6.90  
6.64  
6.64  
6.45  
6.45  
6.43  
6.42  
6.37

-3.24  
2.64  
2.62  
2.60  
2.02  
1.63  
1.61  
1.35  
1.33  
1.33  
1.32  
1.31  
1.30  
0.91  
0.89  
0.87

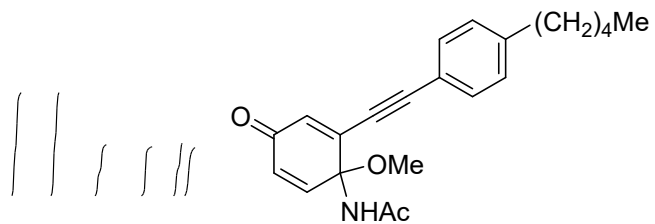

7

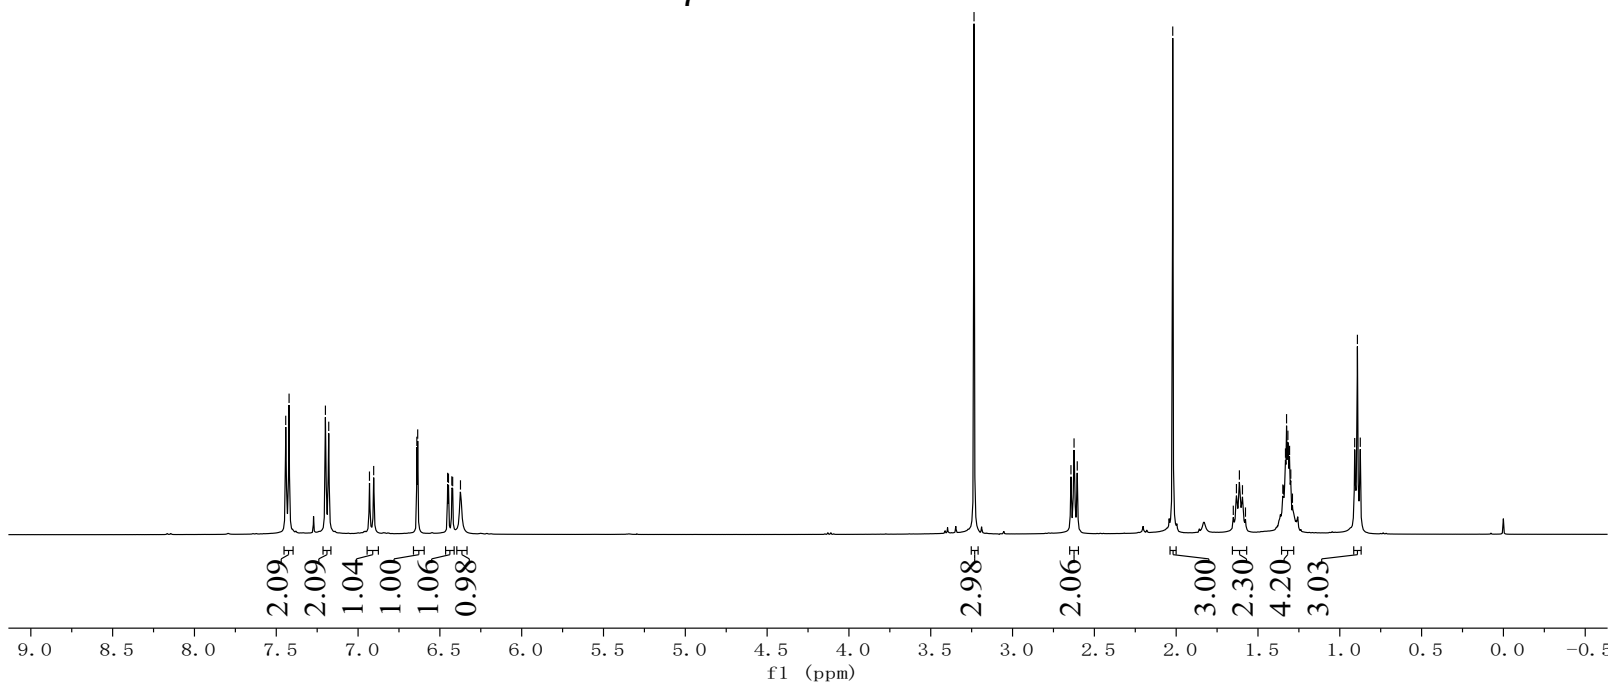



C-W[O]-C. 1. 1. 1r  
13C

- 184.63

- 168.85

145.46

144.45

139.13

134.22

132.13

130.88

128.75

118.66

- 101.58

83.67

80.52

- 51.03

35.97

31.39

30.85

23.66

22.49

14.00

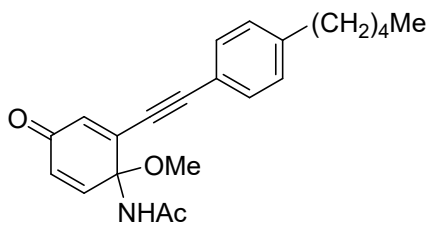

7

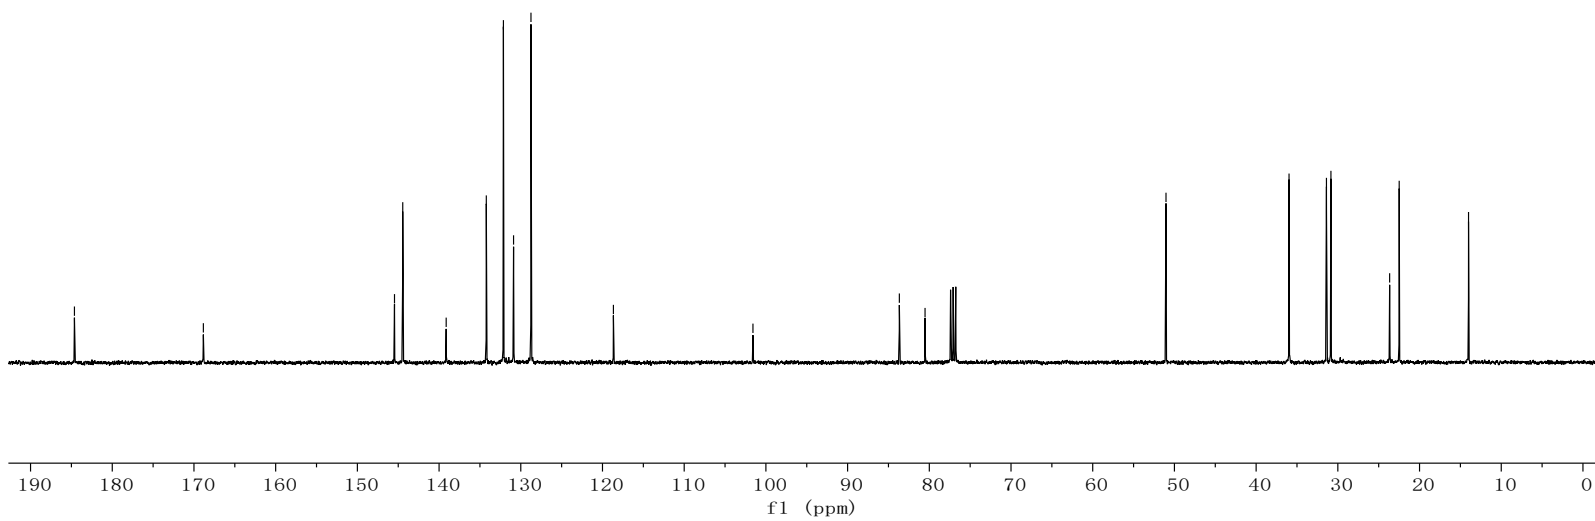

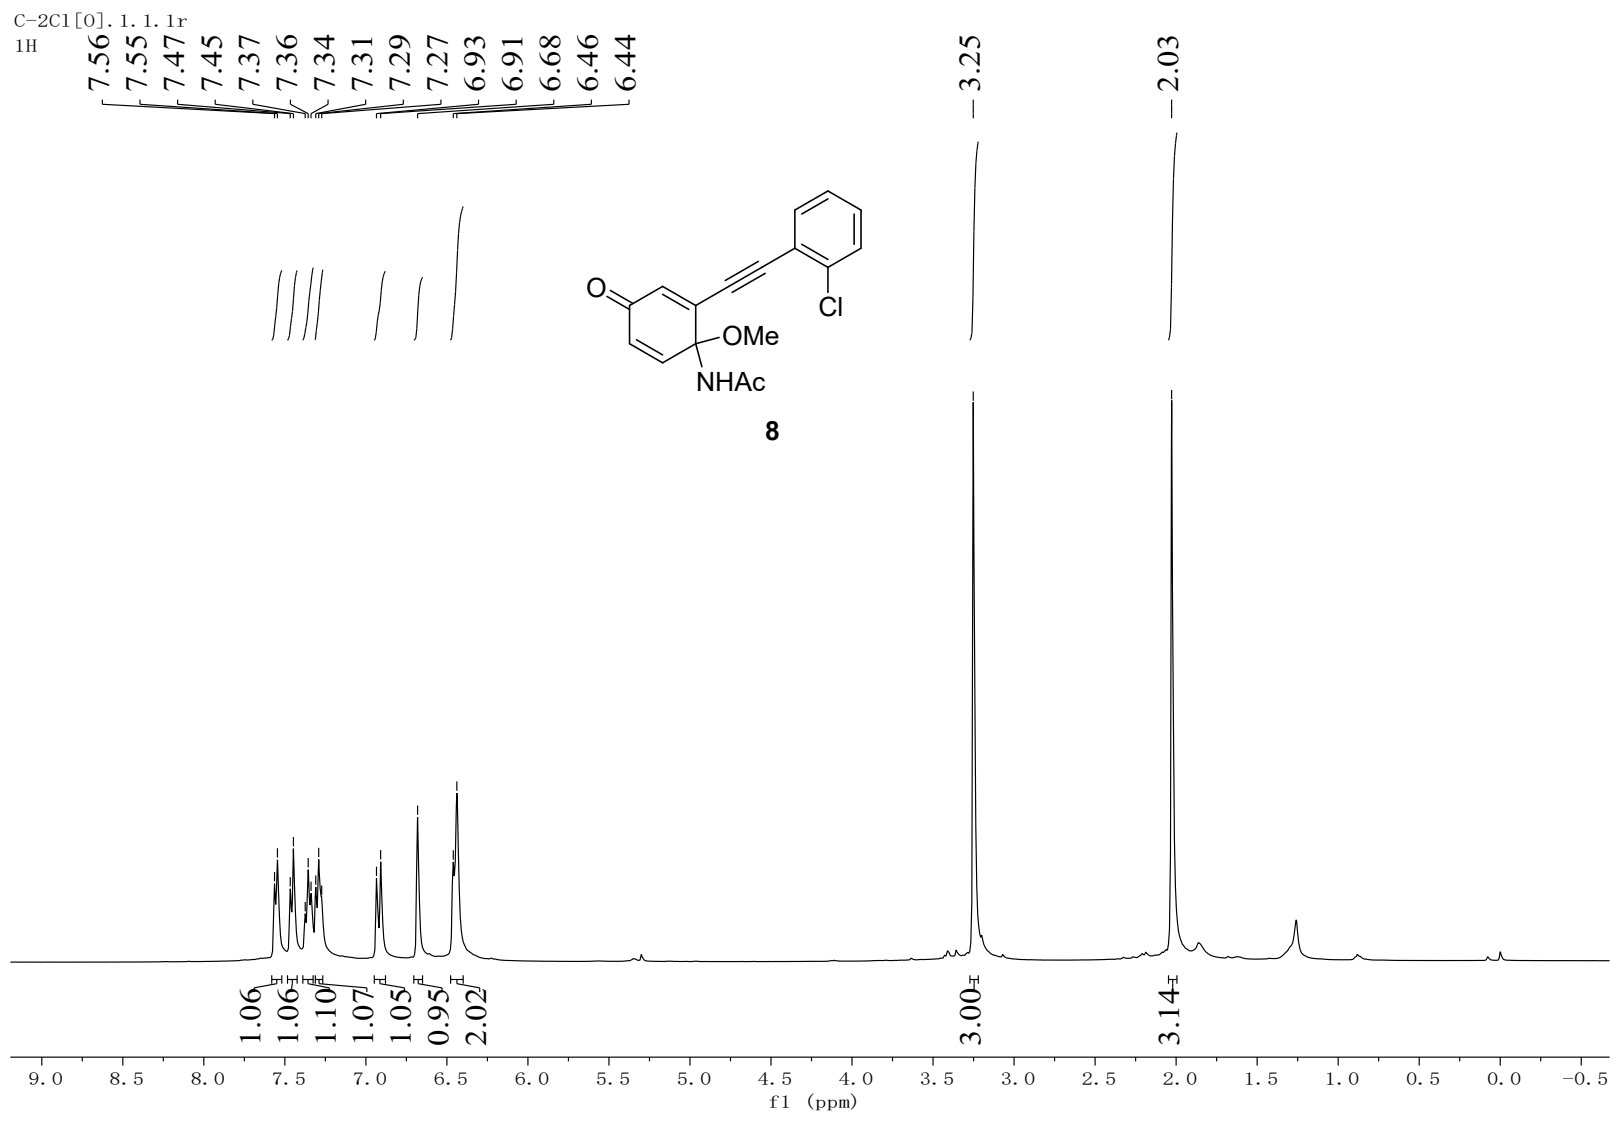

C-2Cl[0]-C. 1. 1. 1r  
13C

— 184.48

— 168.94

144.60

138.52

136.49

134.67

133.66

130.93

130.75

129.54

126.86

121.64

97.18

88.88

80.51

— 51.02

— 23.67

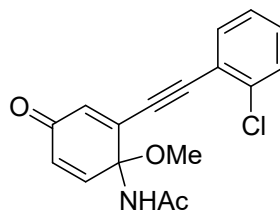

8

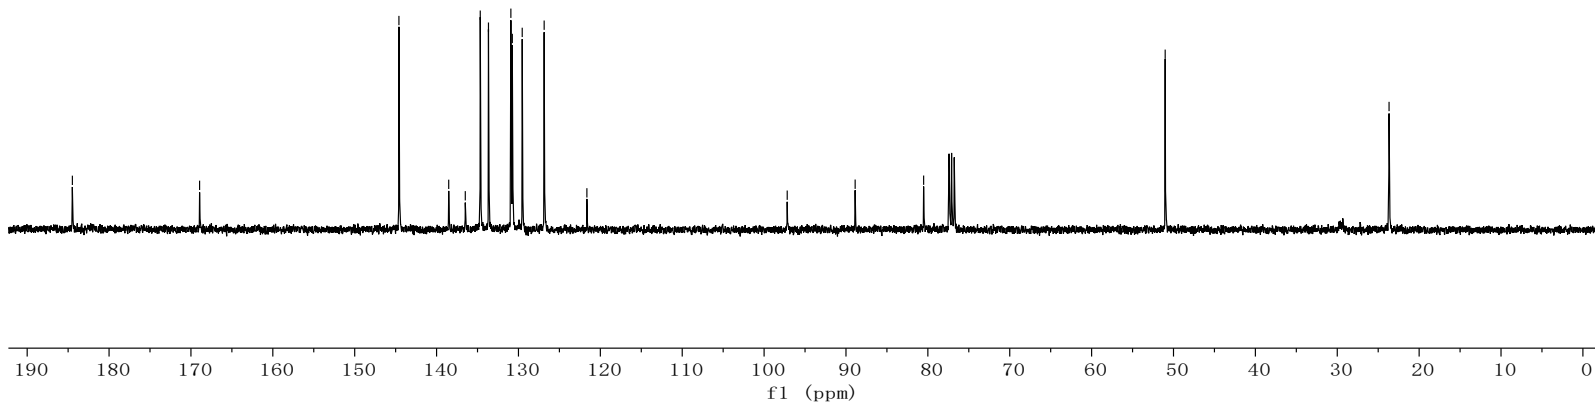

C-3Cl[0]. 1. 1. 1r

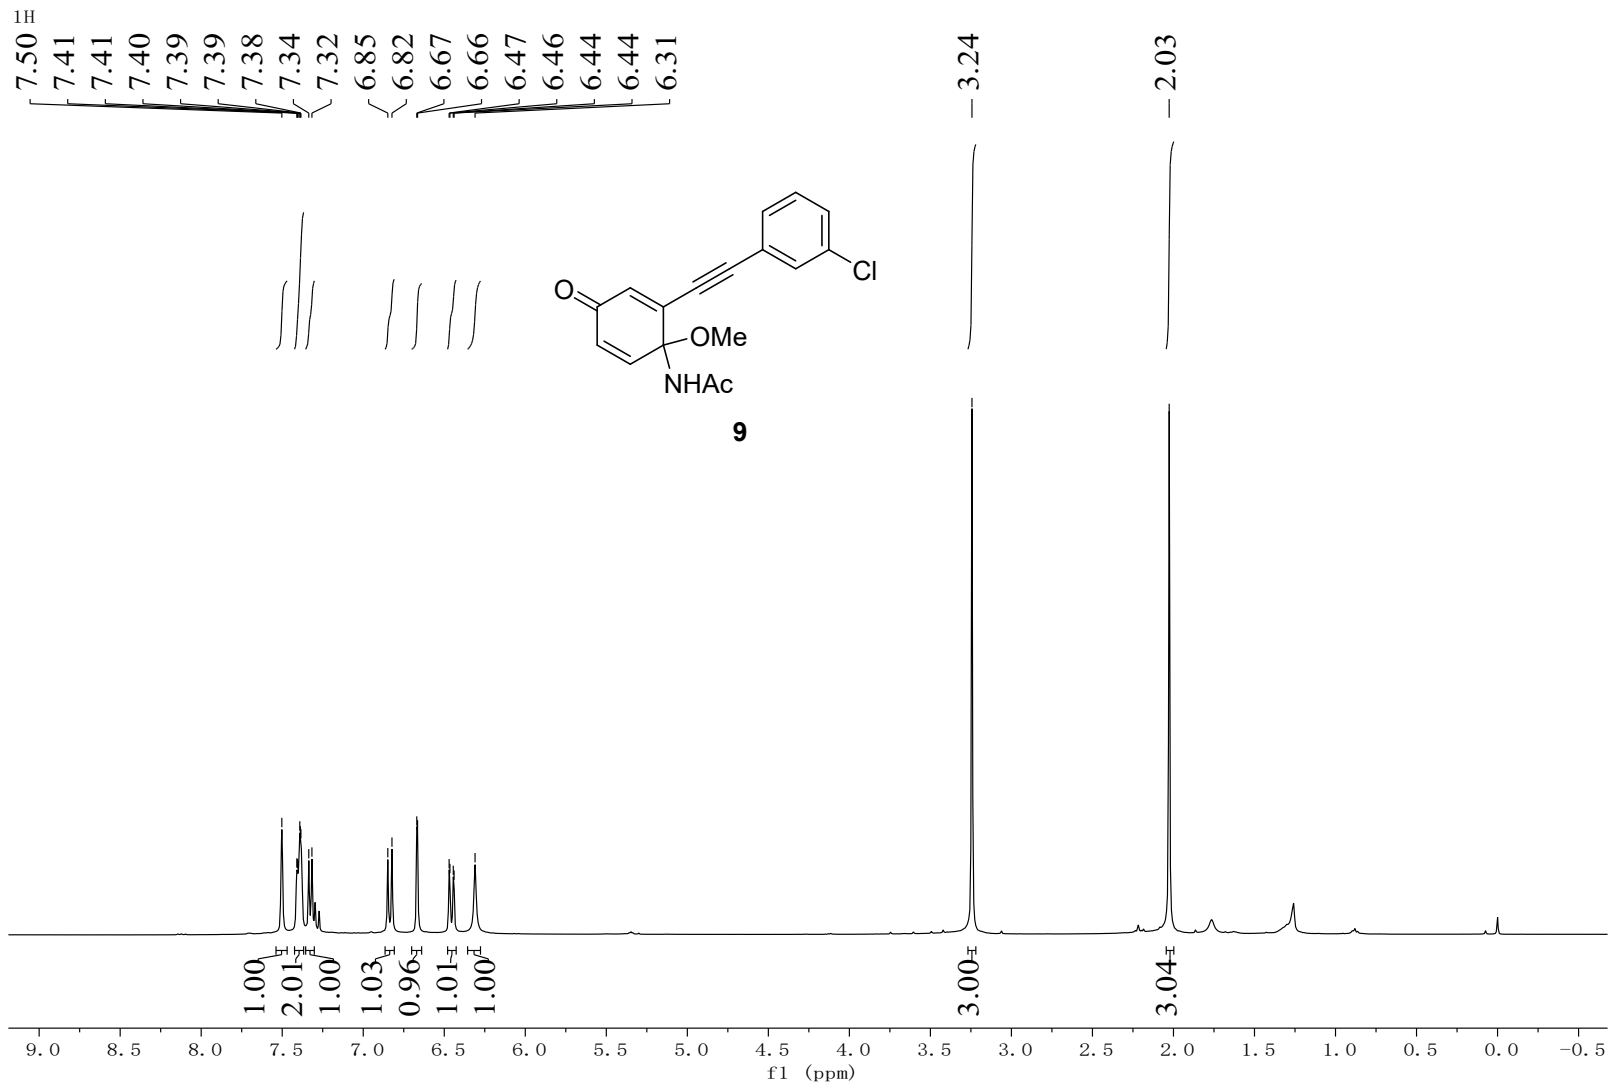

C-3Cl[0]-C. 1. 1. 1r  
13C

- 184.41

- 168.69

144.55

138.46

135.16

134.50

131.86

131.09

130.24

130.07

129.88

123.26

- 98.79

- 84.98

- 80.52

- 51.02

- 23.59

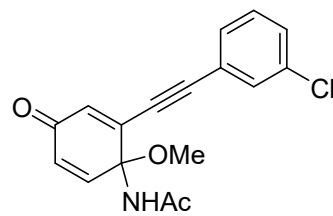

9

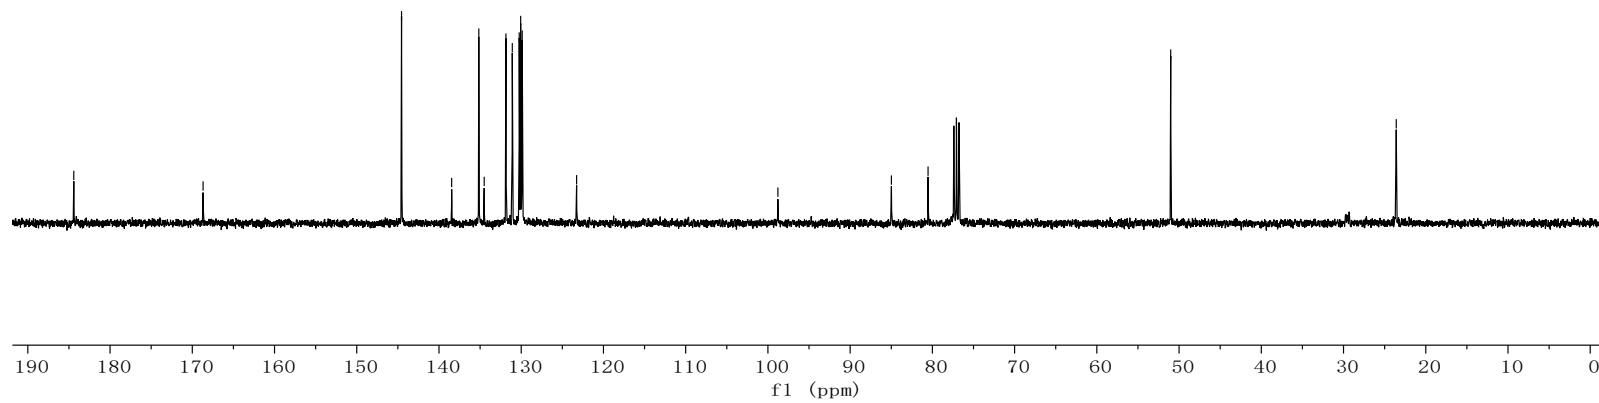

C-4Cl[0]-NEW. 1. fid  
1H

7.46  
7.44  
7.37  
7.35  
6.87  
6.84  
6.66  
6.65  
6.47  
6.46  
6.44  
6.44  
6.26

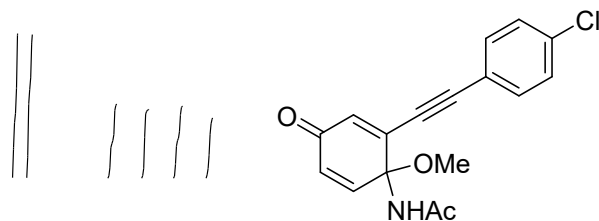

10

3.24  
2.02

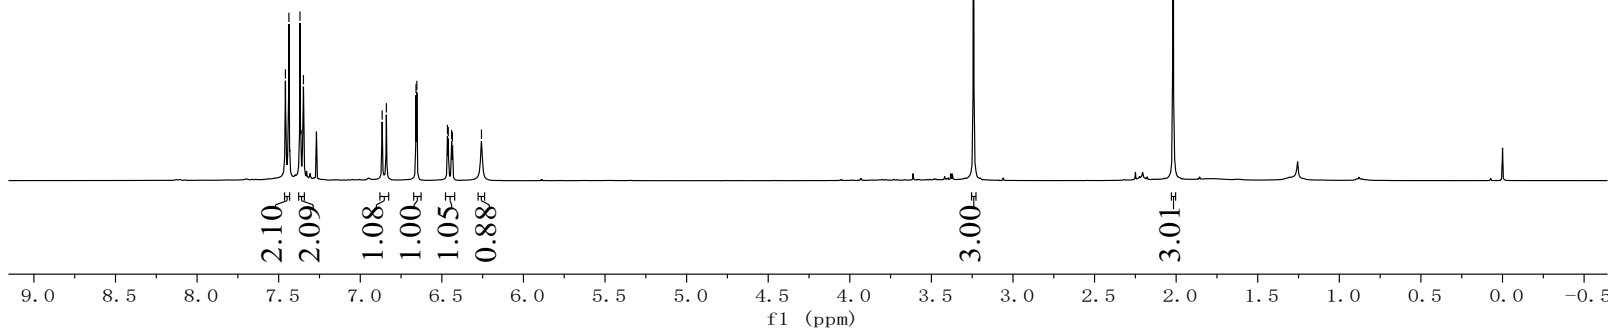

C-4Cl[0]-C-NEW. 1. fid  
13C

— 184.41

— 168.66

144.42

138.56

136.10

134.89

133.32

131.07

129.02

120.01

— 99.41

— 84.91

— 80.51

— 51.04

— 23.62

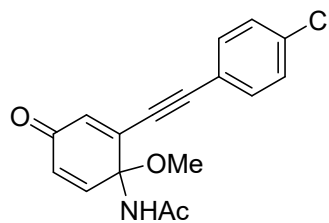

10

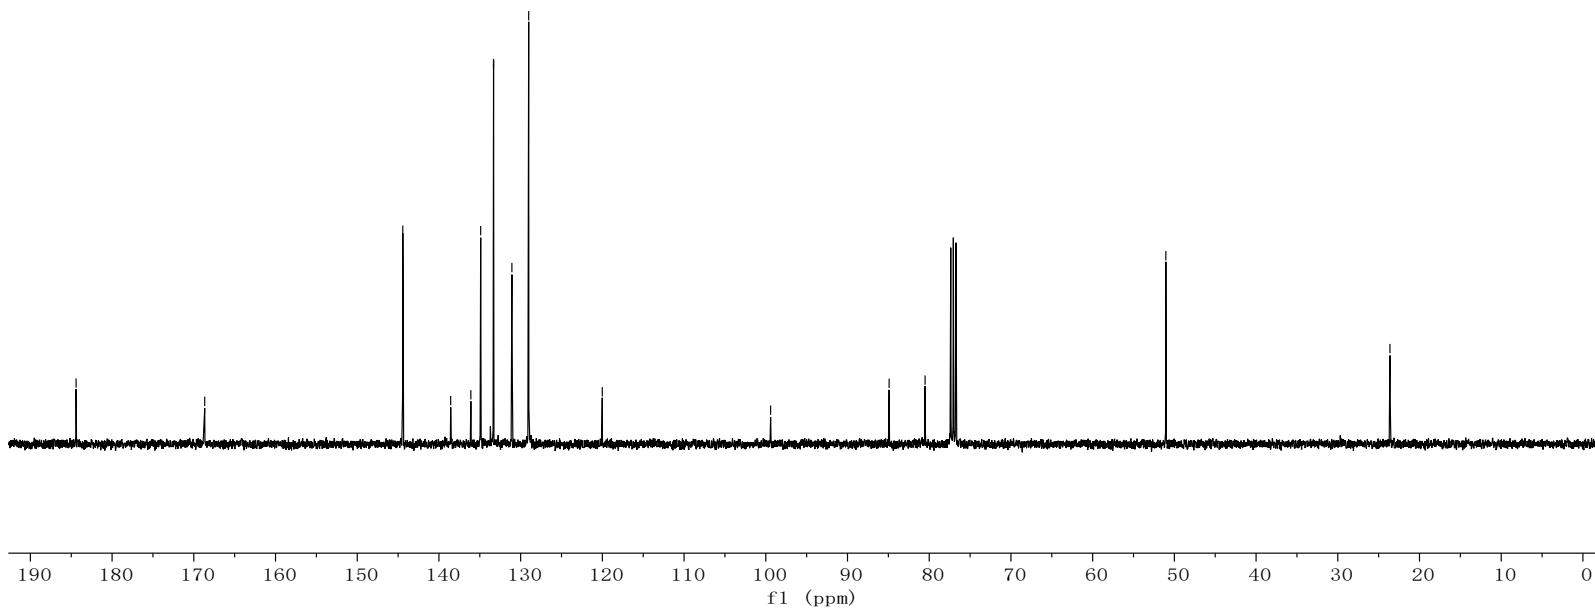

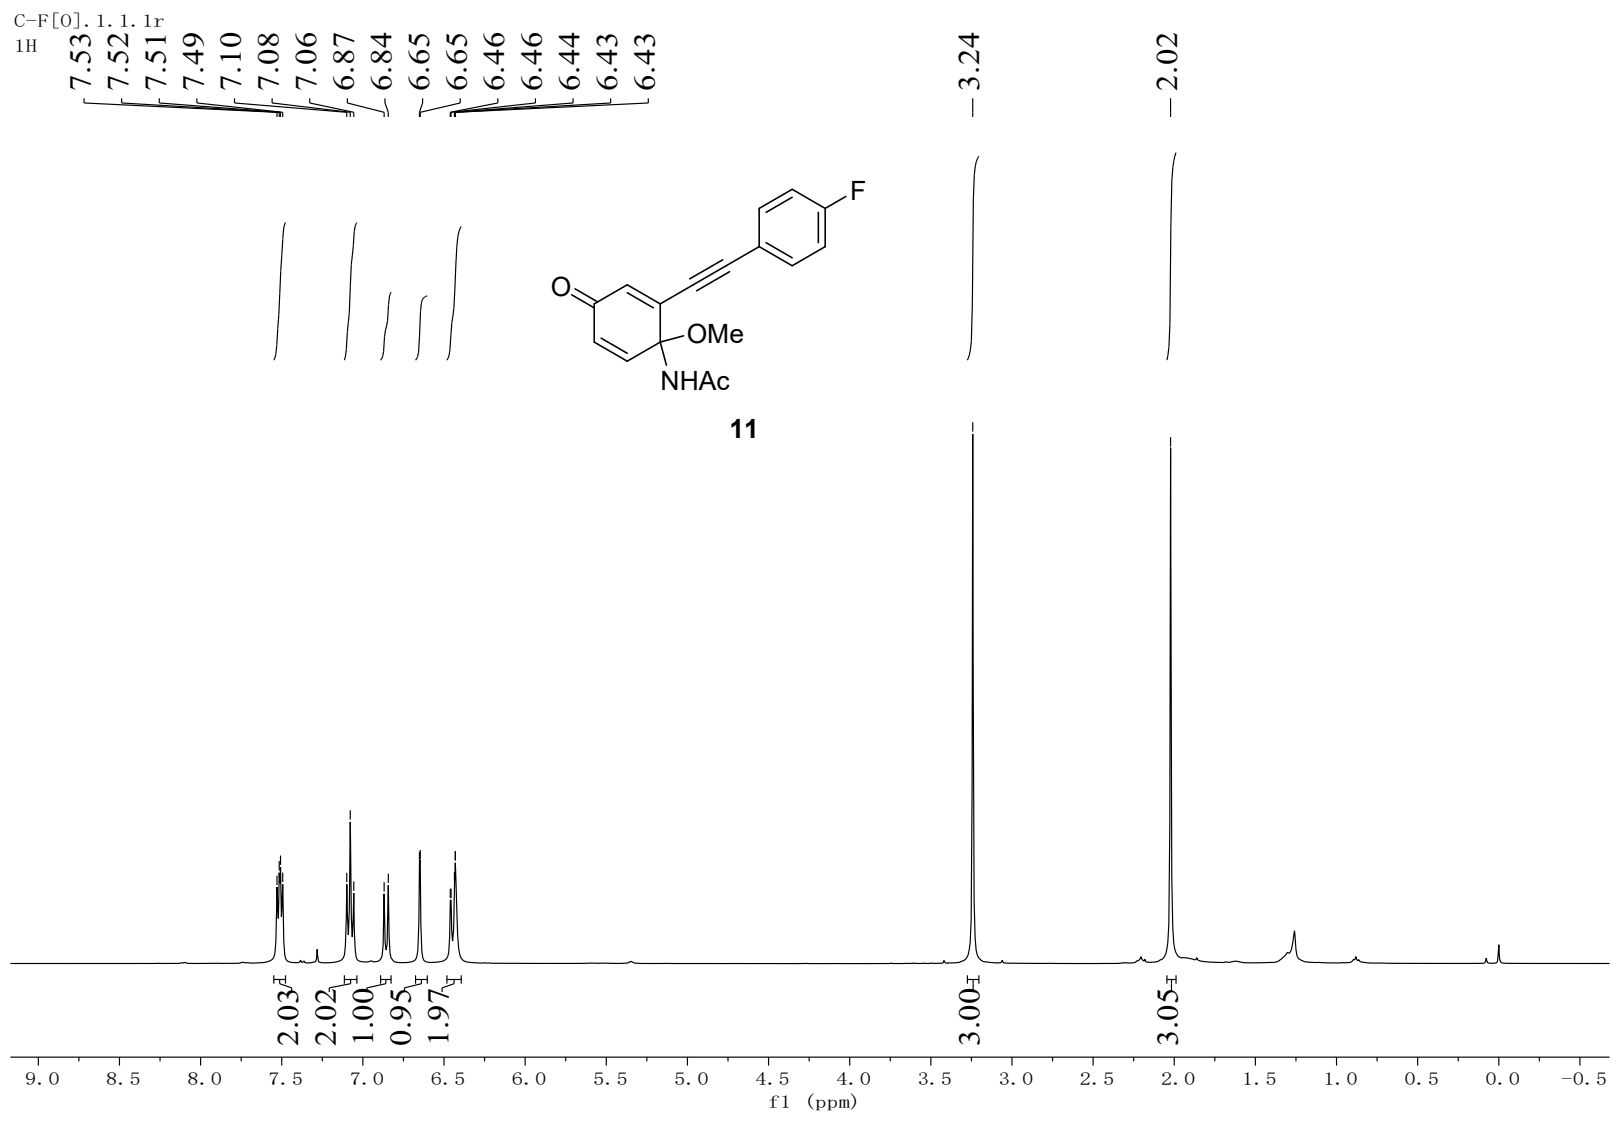



C-F[0]-C. 1. 1. 1r  
13C

- 184.54

~ 168.80

~ 164.65

~ 162.13

144.55

138.85

134.62

134.29

134.21

131.00

117.73

117.70

116.17

115.95

- 99.69

~ 83.91

~ 80.54

- 51.00

- 23.56

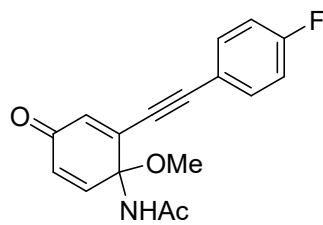

11

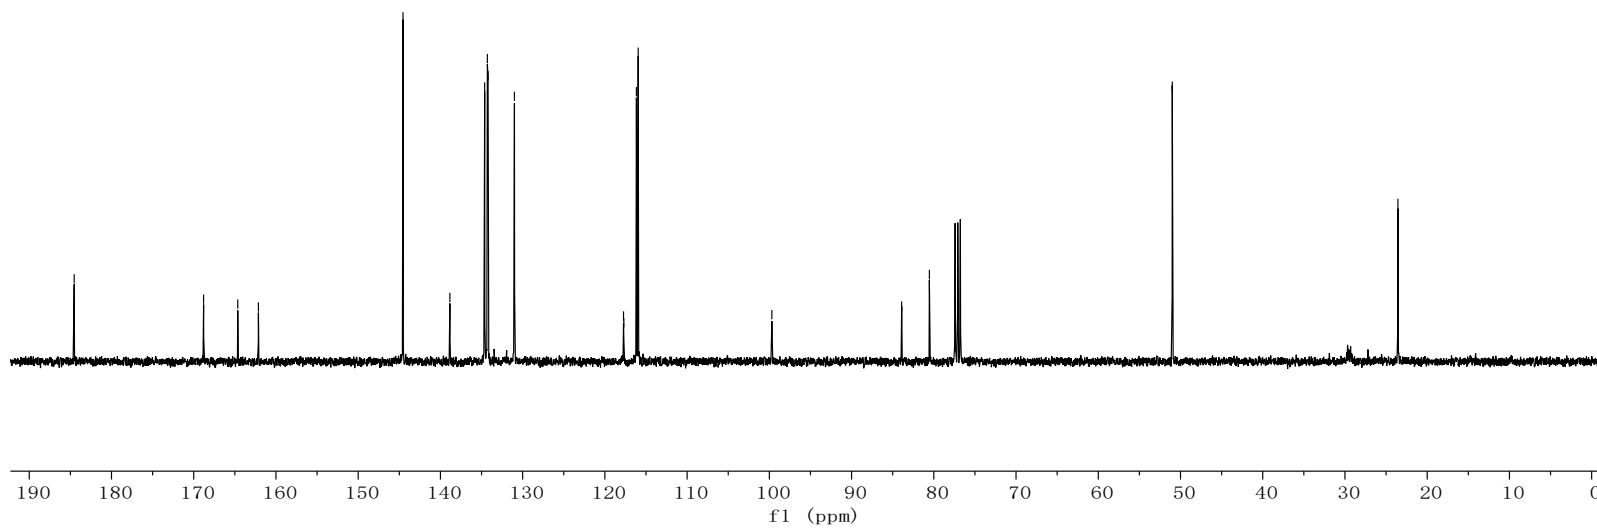

C-Br[0].1.1.1r  
1H

7.53  
7.51  
7.39  
7.37  
6.87  
6.84  
6.66  
6.66  
6.47  
6.46  
6.44  
6.44  
6.24

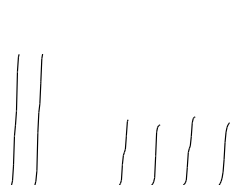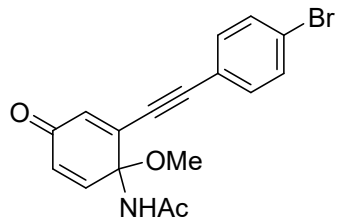

12

3.24

2.02

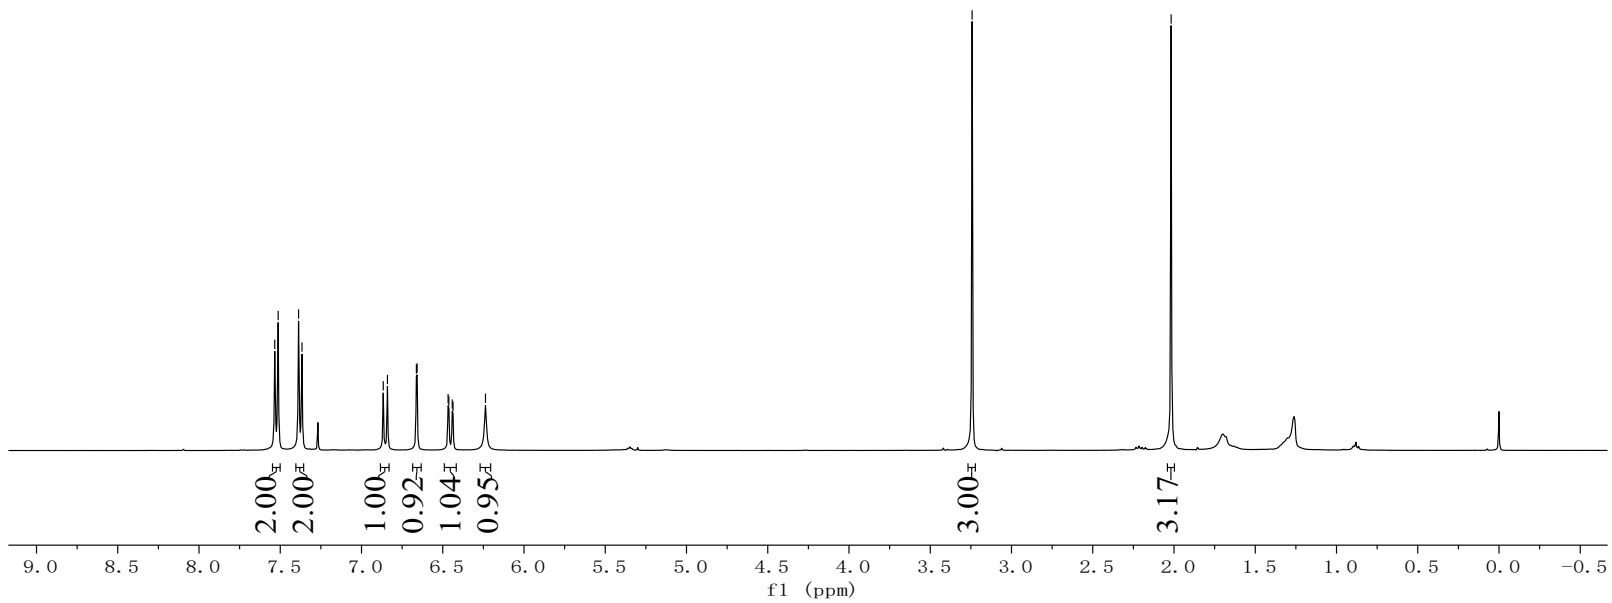

C-Br[0]-C. 1. 1. 1r  
13C

— 184.42

— 168.64

144.43

138.55

134.94

133.47

131.97

131.09

124.42

120.48

— 99.44

— 85.05

— 80.50

— 51.05

— 23.62

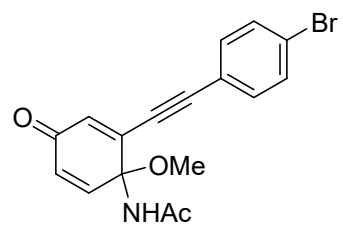

12

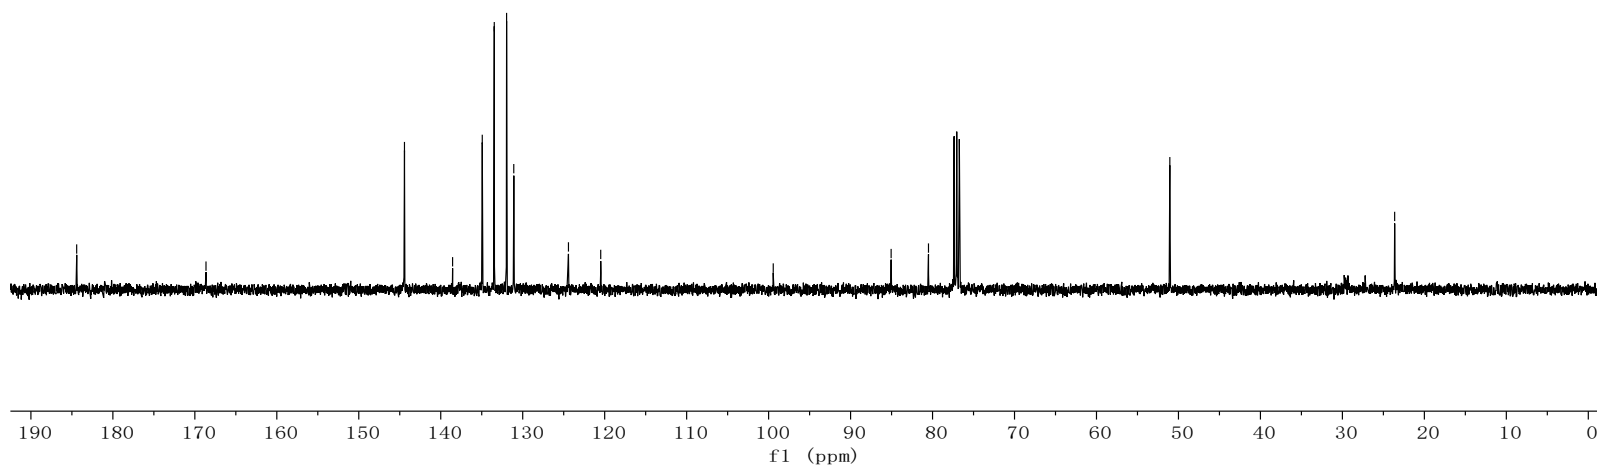

C-OMe[0]. 1. 1. 1r  
1H

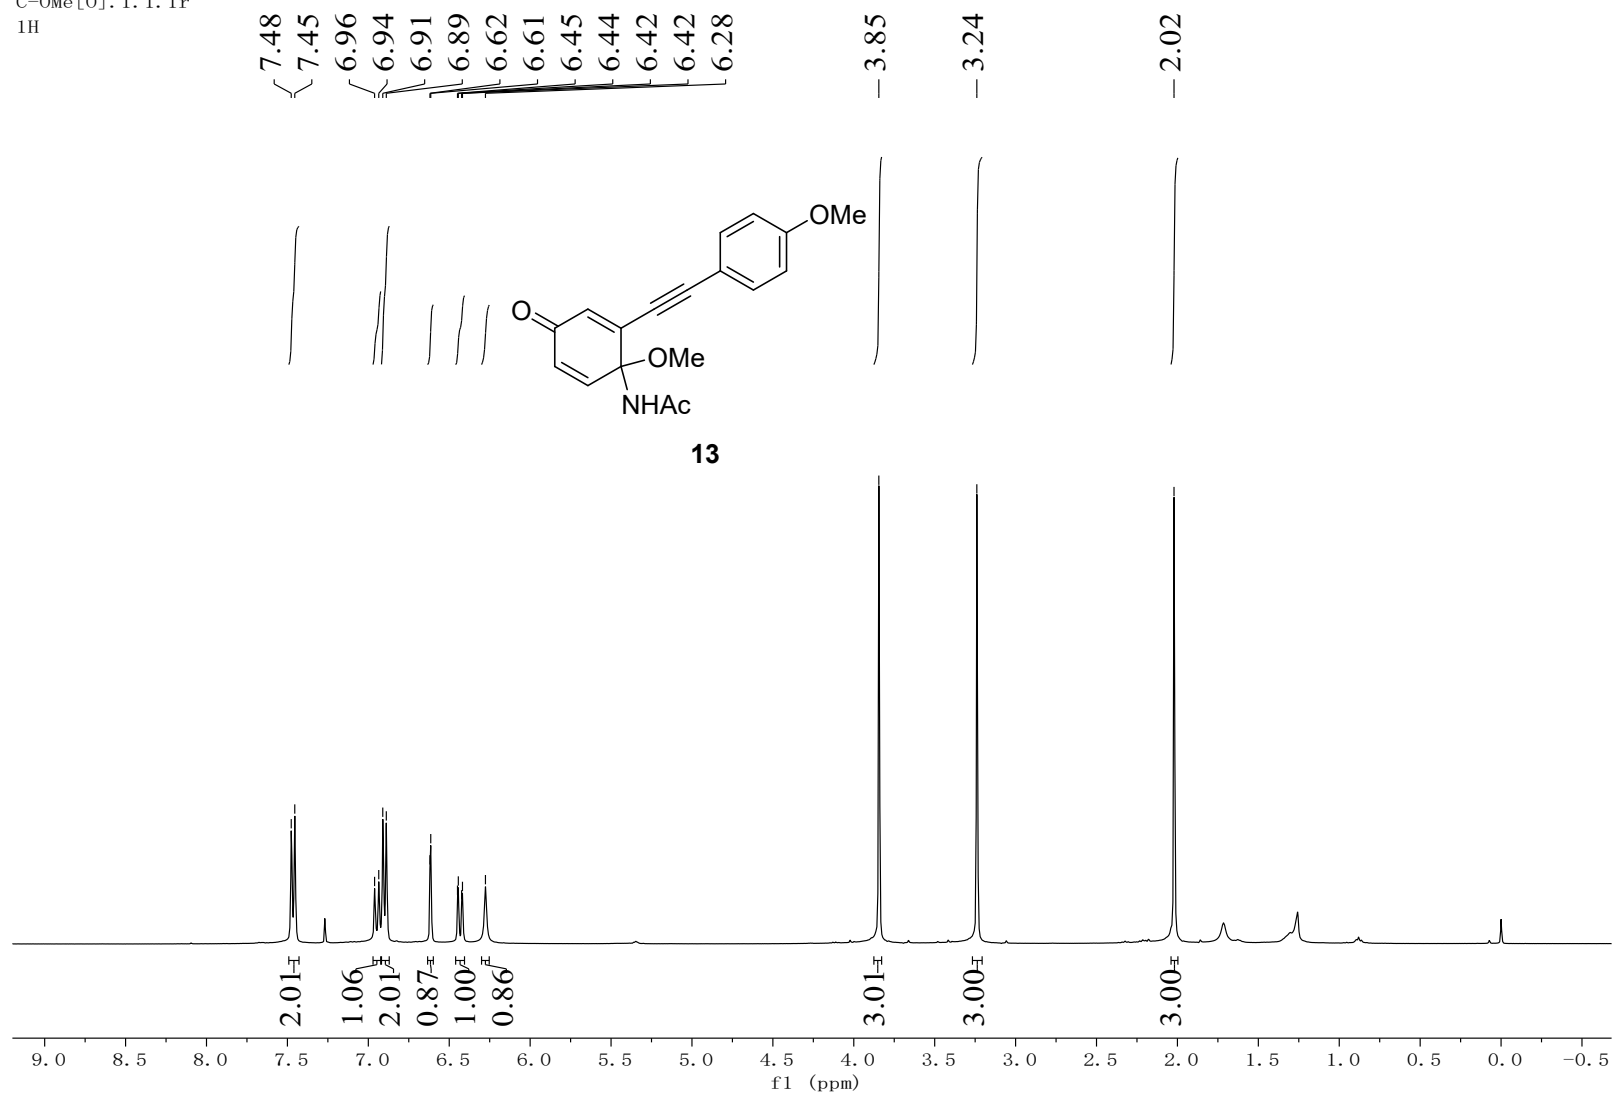

C-OMe[0]-C. 1. 1. 1r  
13C

- 184.61
- 168.80
- 160.95
- 144.28
- 139.20
- 133.89
- 133.84
- 130.89
- 114.32
- 113.53
- 101.75
- 83.30
- 80.50
- 55.43
- 51.08
- 23.72

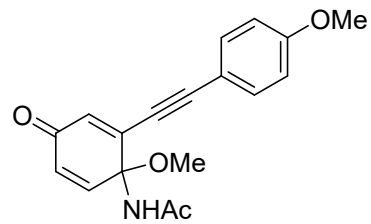

13

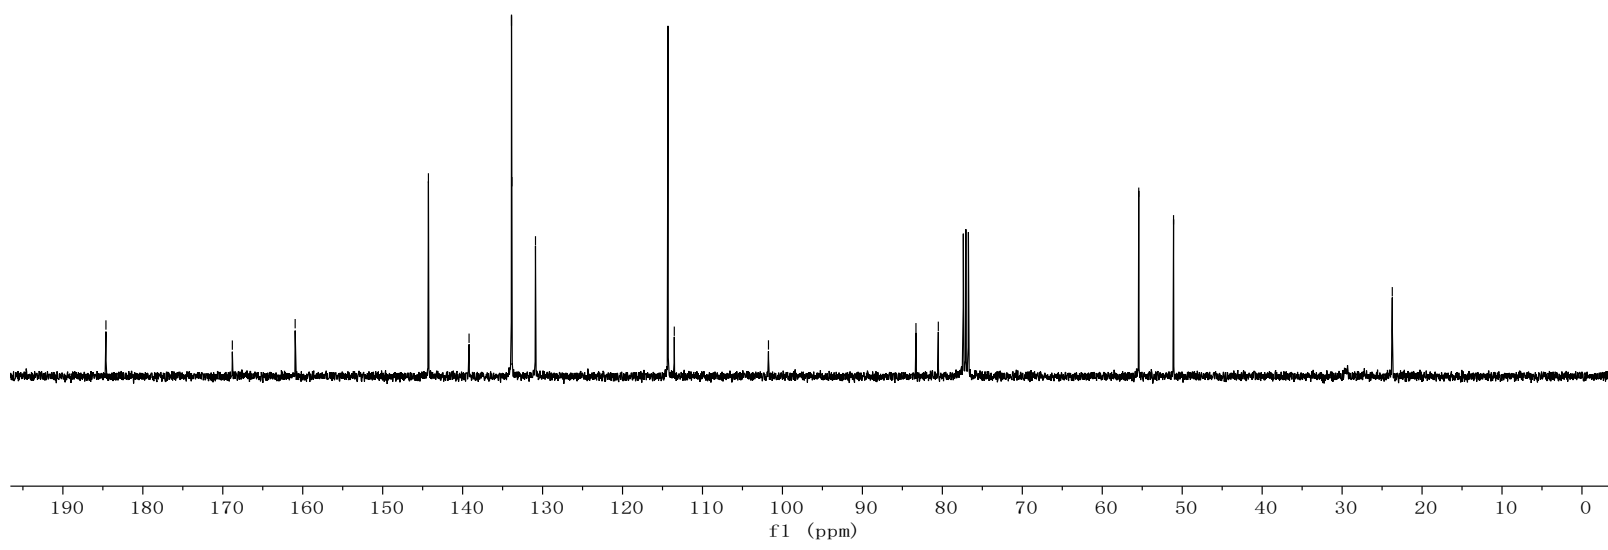

C-N02[0]. 1. fid

8.26  
8.24  
7.69  
7.68  
7.67  
7.66  
6.79  
6.77  
6.73  
6.72  
6.50  
6.49  
6.47  
6.47  
6.14

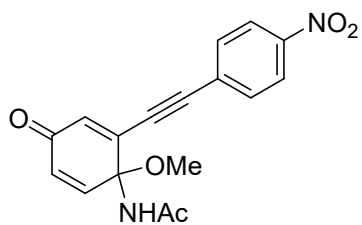

14

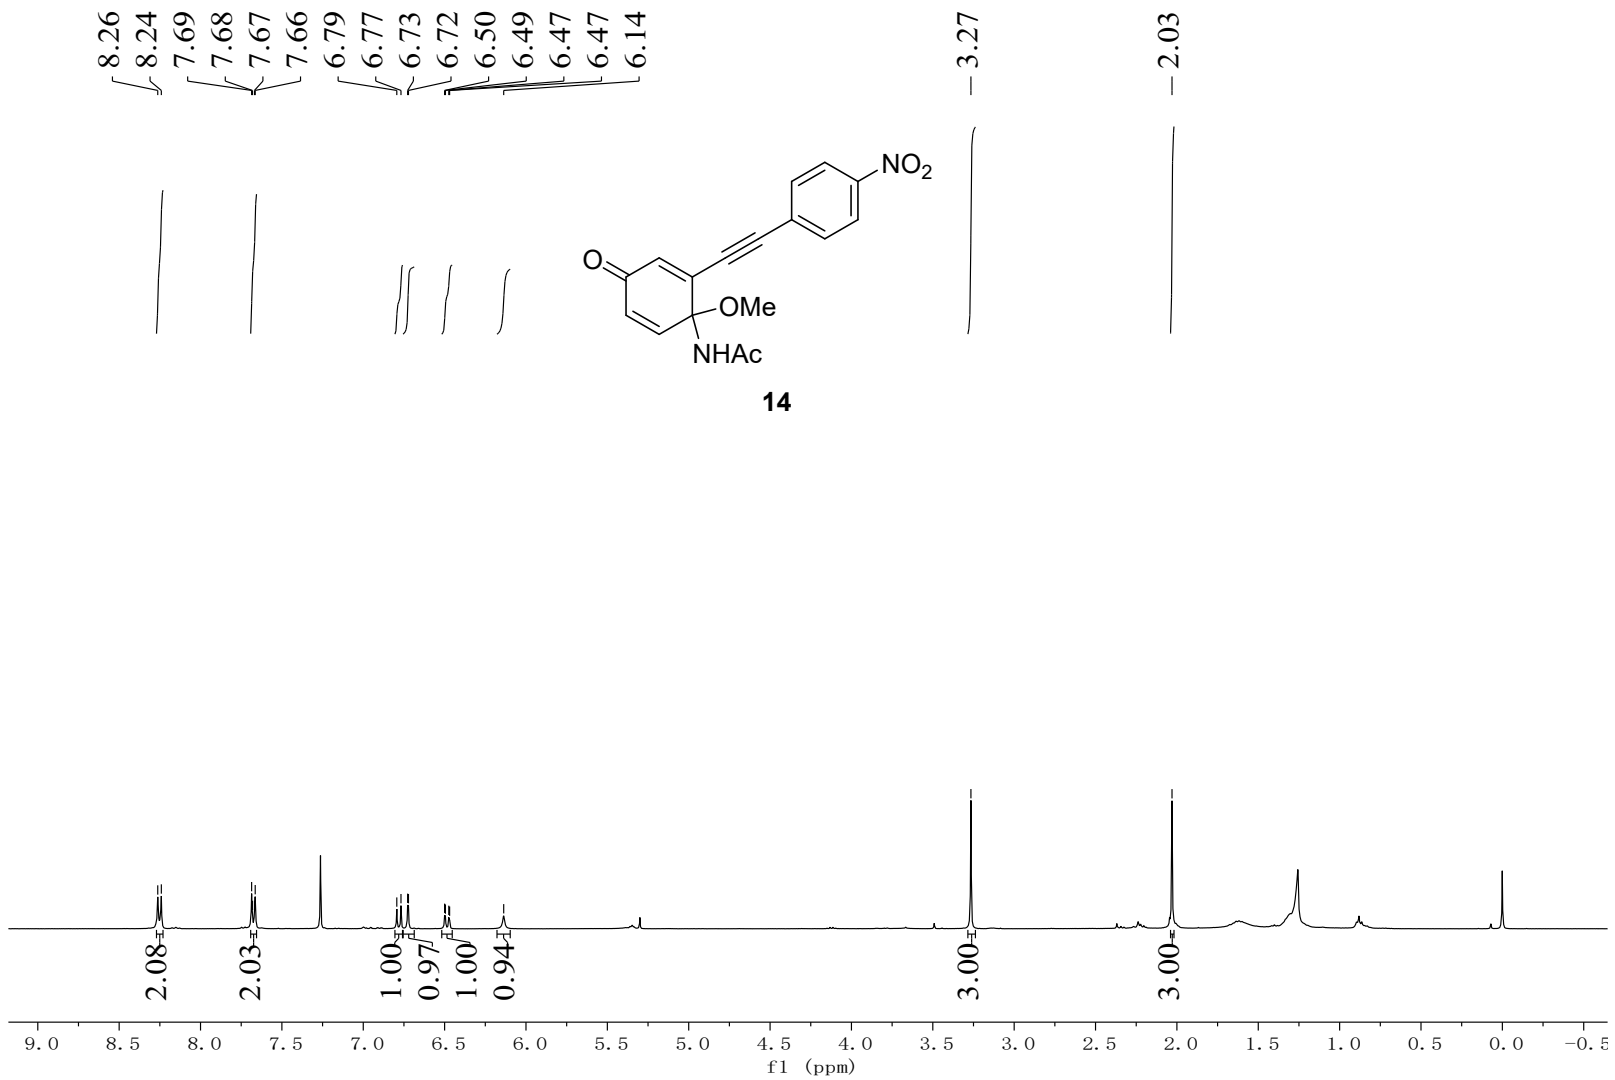

C-N02[0]-FIN-C. 1. fid

- 184.10

- 168.46

144.46

137.35

136.04

134.90

132.90

131.35

128.21

123.79

97.31

88.31

80.53

- 51.06

- 23.56

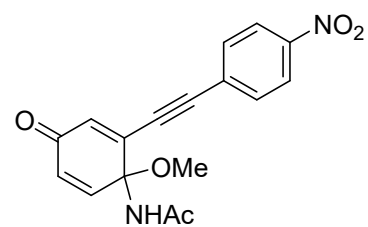

14

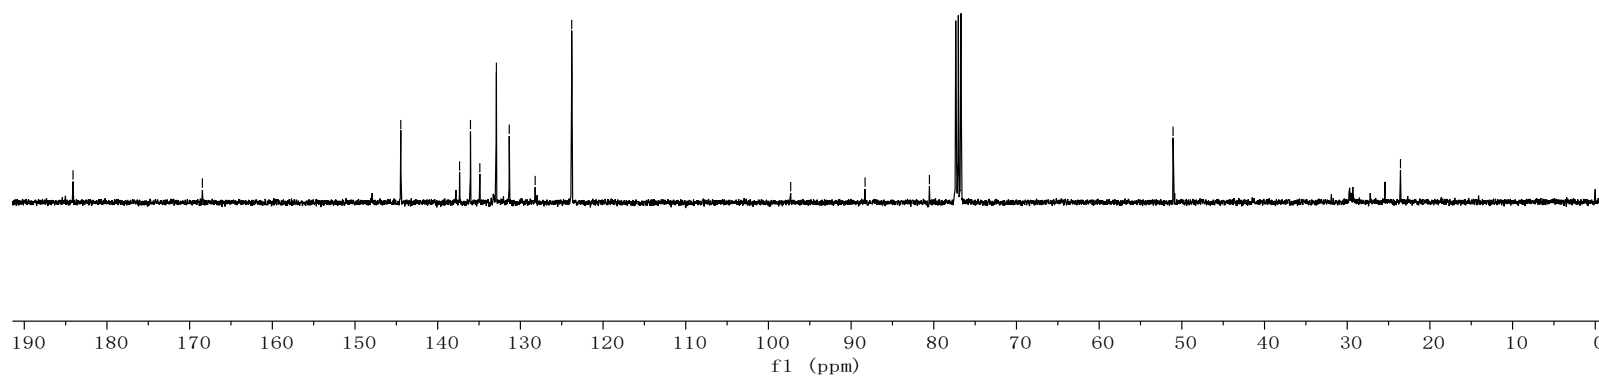

C-COOMe[0]. 1. 1. 1r  
1H

8.05  
8.03  
7.59  
7.56  
6.85  
6.82  
6.69  
6.69  
6.48  
6.47  
6.45  
6.45  
6.34

3.94

3.25

2.03

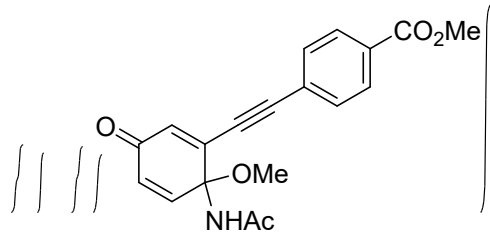

15

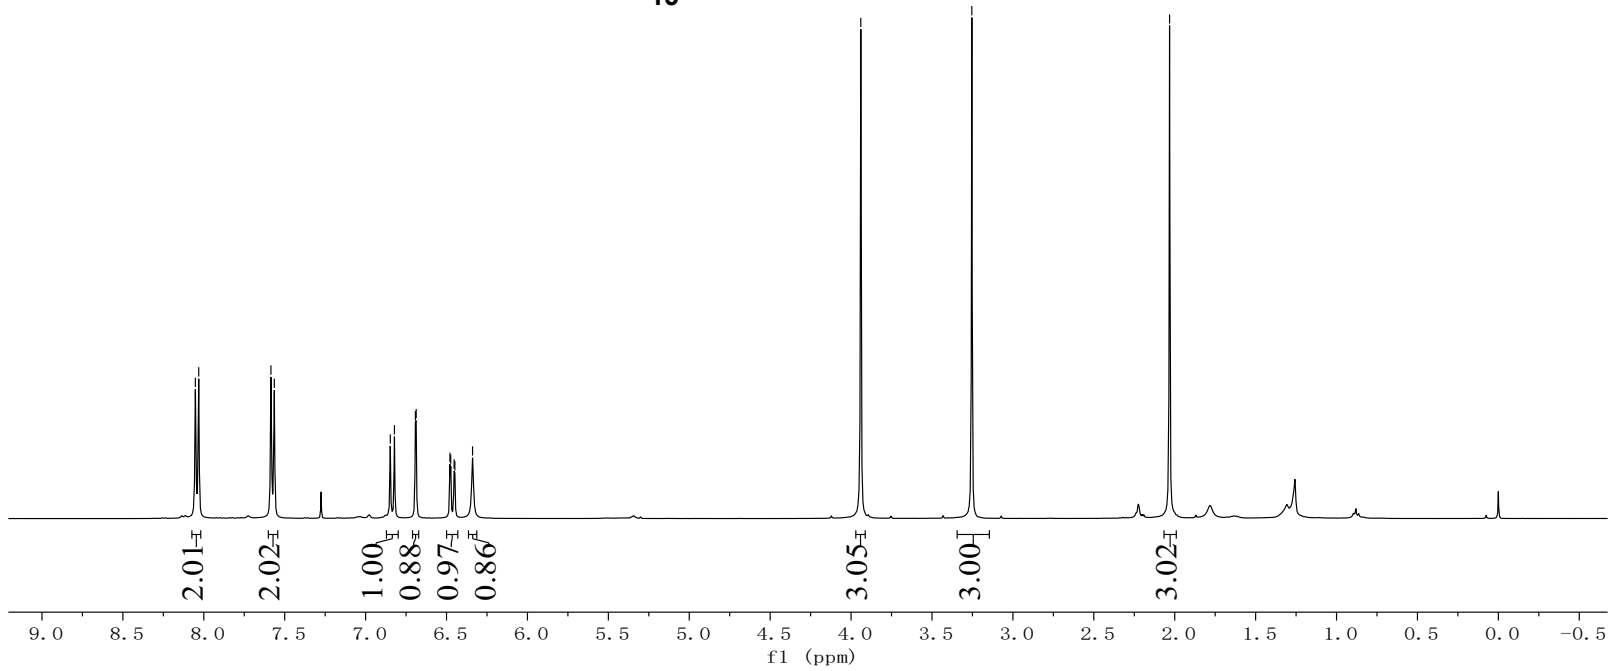



C-COOMe [0]-C. 1. 1. 1r  
13C

— 184.38

~ 168.70

~ 166.24

144.53

138.39

135.33

132.05

131.14

130.92

129.68

126.05

— 99.28

— 86.43

— 80.53

~ 52.43

~ 51.04

— 23.58

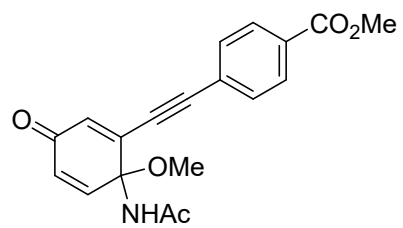

15

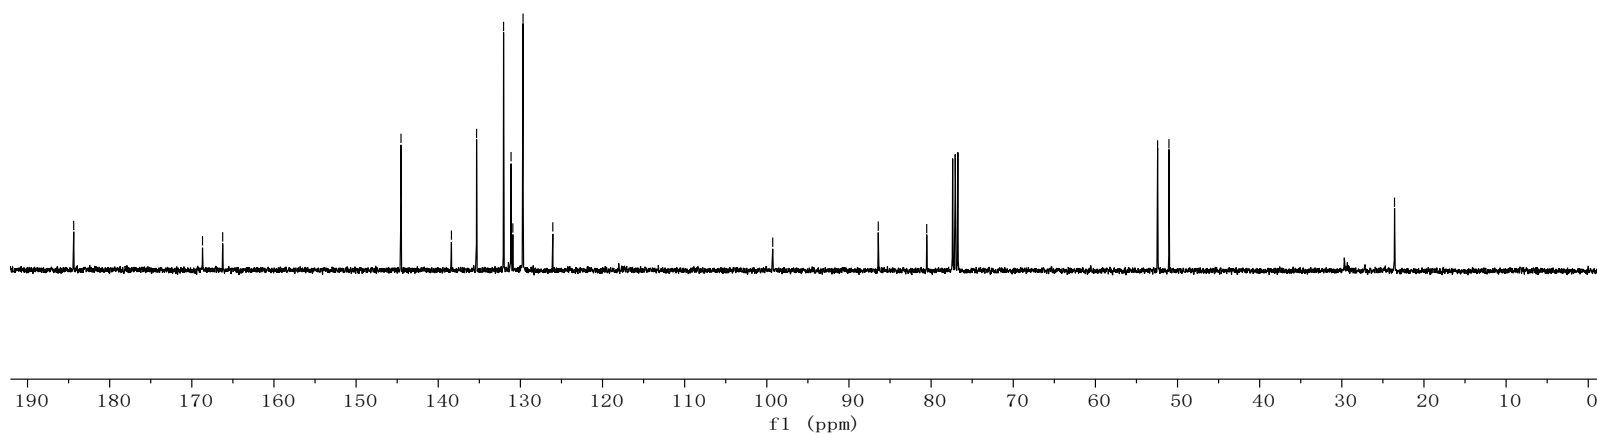

C-CN[0].1. fid  
1H

7.69  
7.67  
7.62  
7.60  
6.80  
6.80  
6.78  
6.77  
6.71  
6.70  
6.50  
6.49  
6.49  
6.46  
6.46  
6.17

3.25

2.02

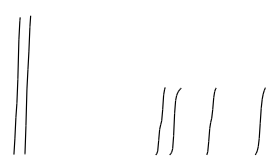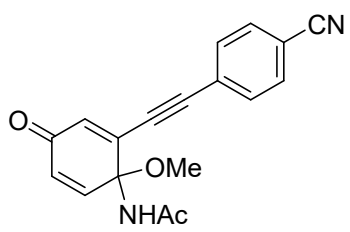

16

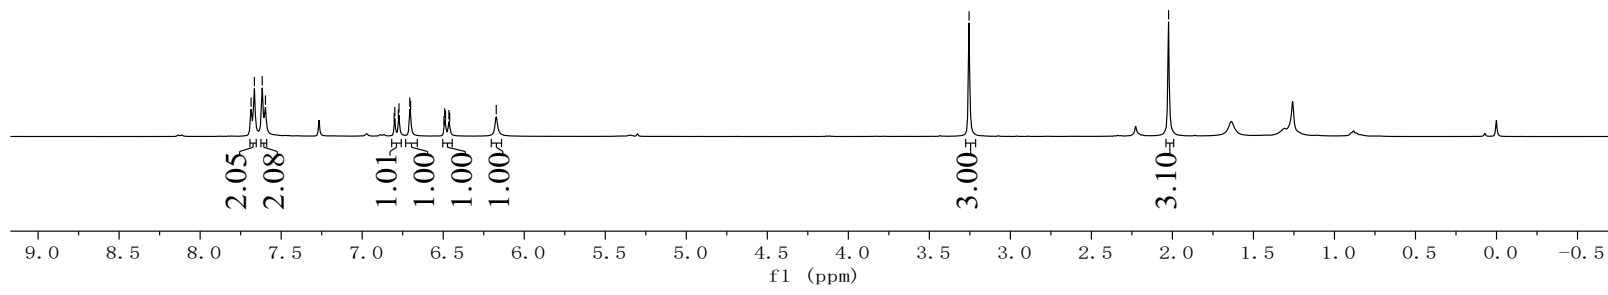

C-CN[0]-C. 1. fid

- 184.13

- 168.49

144.42

137.86

135.87

132.57

132.23

131.31

126.32

118.05

113.11

- 97.70

- 87.63

- 80.51

- 51.05

- 23.58

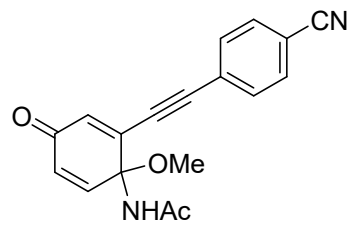

16

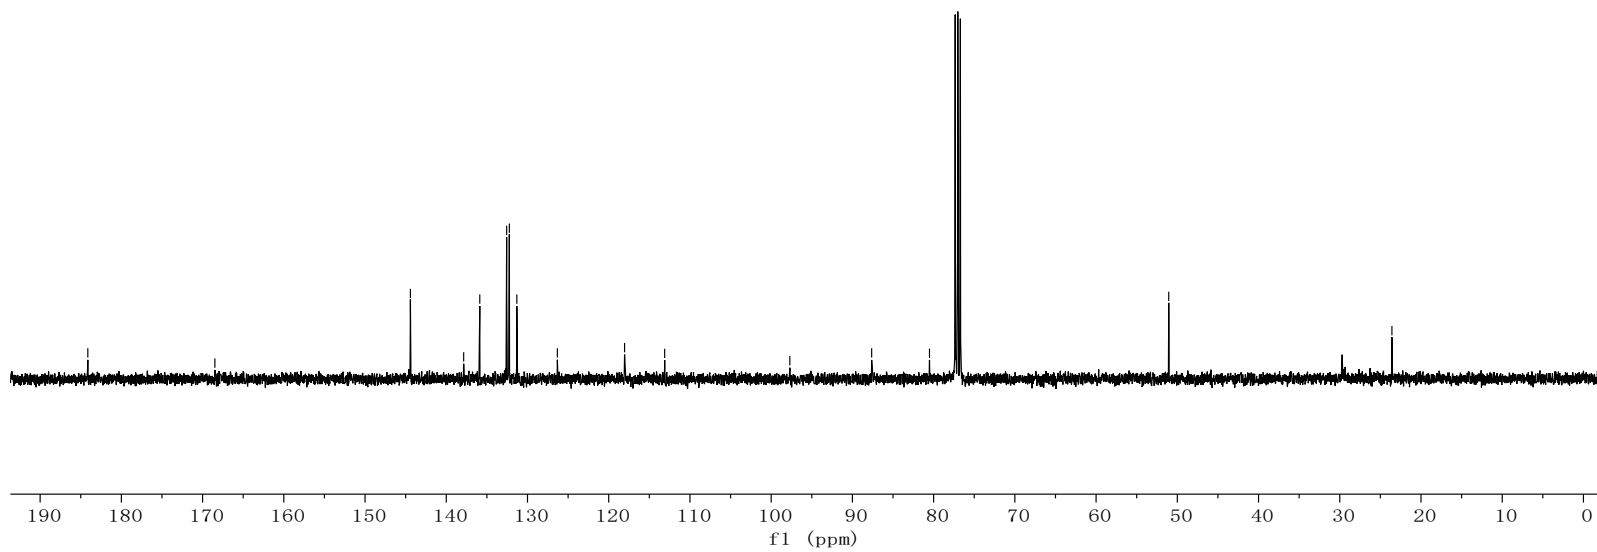

C-S[0]. 1. 1. 1r

<sup>1</sup>H

7.43  
7.42  
7.37  
7.37  
7.07  
7.06  
7.05  
6.88  
6.85  
6.64  
6.64  
6.46  
6.46  
6.44  
6.43  
6.25

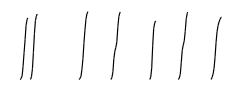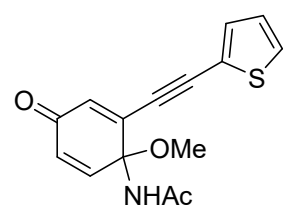

17

3.24

2.03

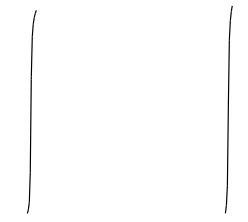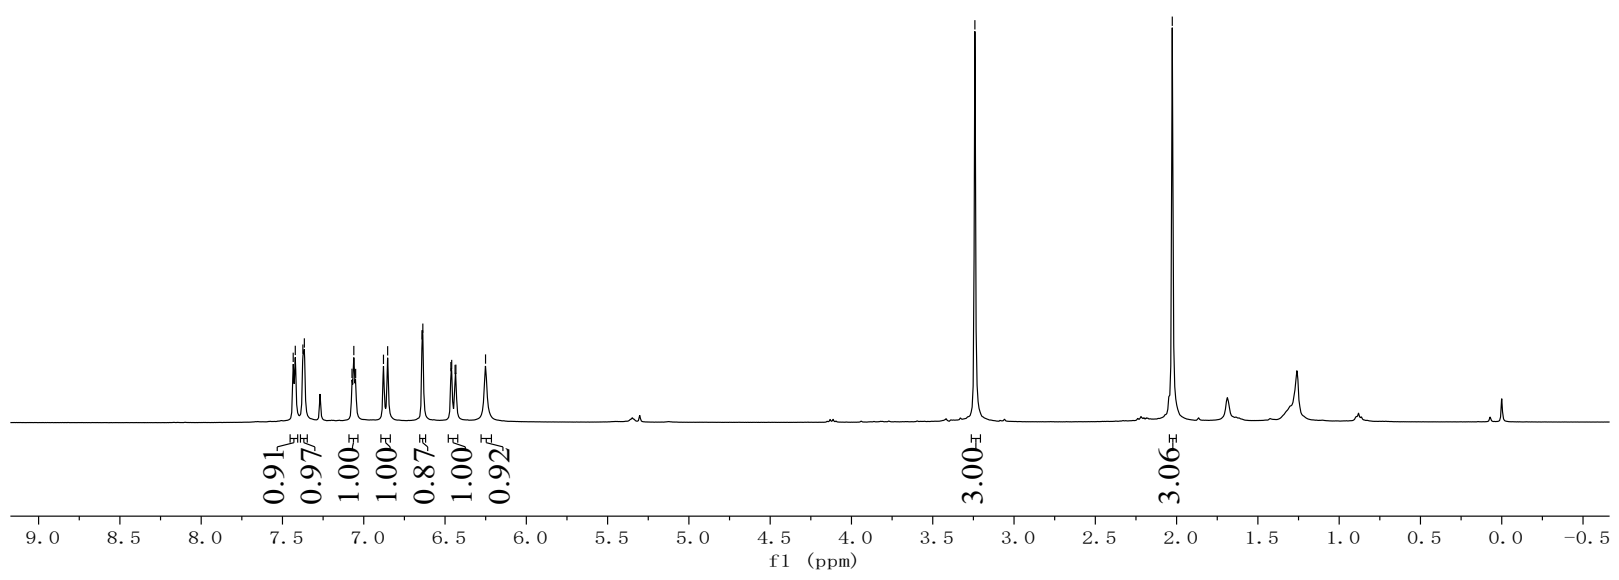

C-S[O]-C. 2. 1. 1r  
C-S[O]-C

— 184.37

— 168.71

144.31

138.60

134.23

134.15

131.05

129.82

127.60

121.42

94.24

88.16

80.51

— 51.06

— 23.64

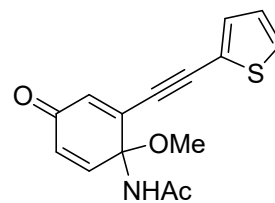

17

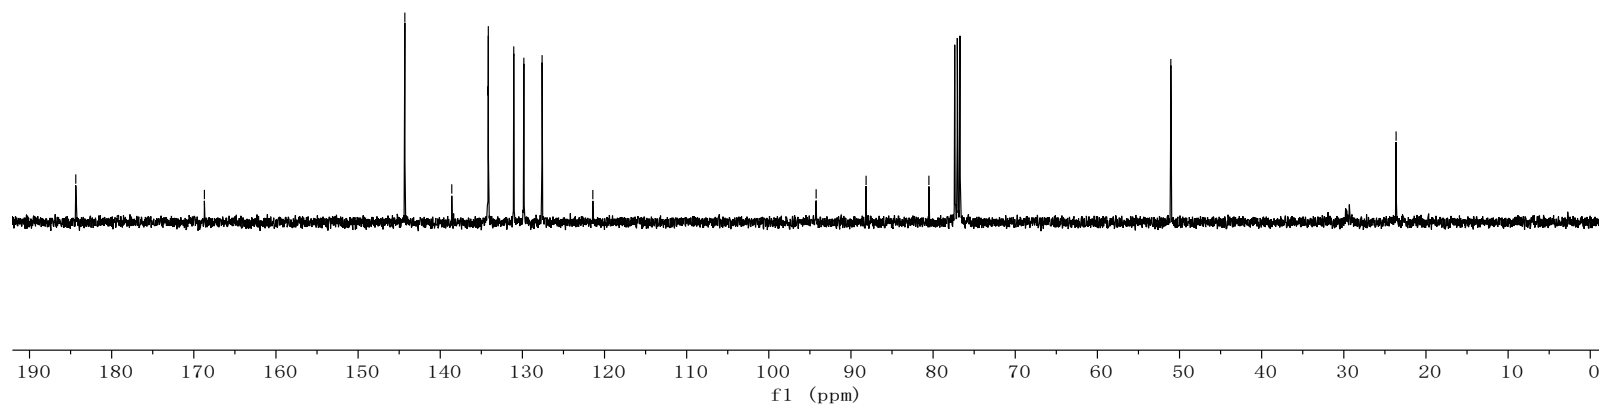

C-Py[0]. 1. 1. 1r

<sup>1</sup>H

8.66  
8.66  
8.65  
8.65  
8.65  
8.64  
8.64  
8.64  
7.76  
7.76  
7.74  
7.74  
7.72  
7.72  
7.56  
7.56  
7.55  
7.54  
7.54  
7.53  
7.35  
7.35  
7.34  
7.34  
7.33  
7.33  
7.32  
7.32  
7.28  
6.86  
6.83  
6.73  
6.73  
6.70  
6.47  
6.47  
6.45  
6.44  
3.26  
2.03

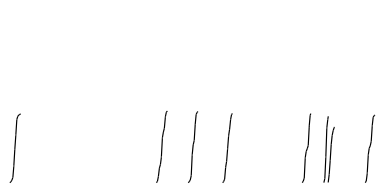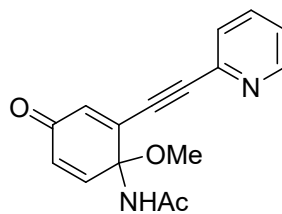

**18**

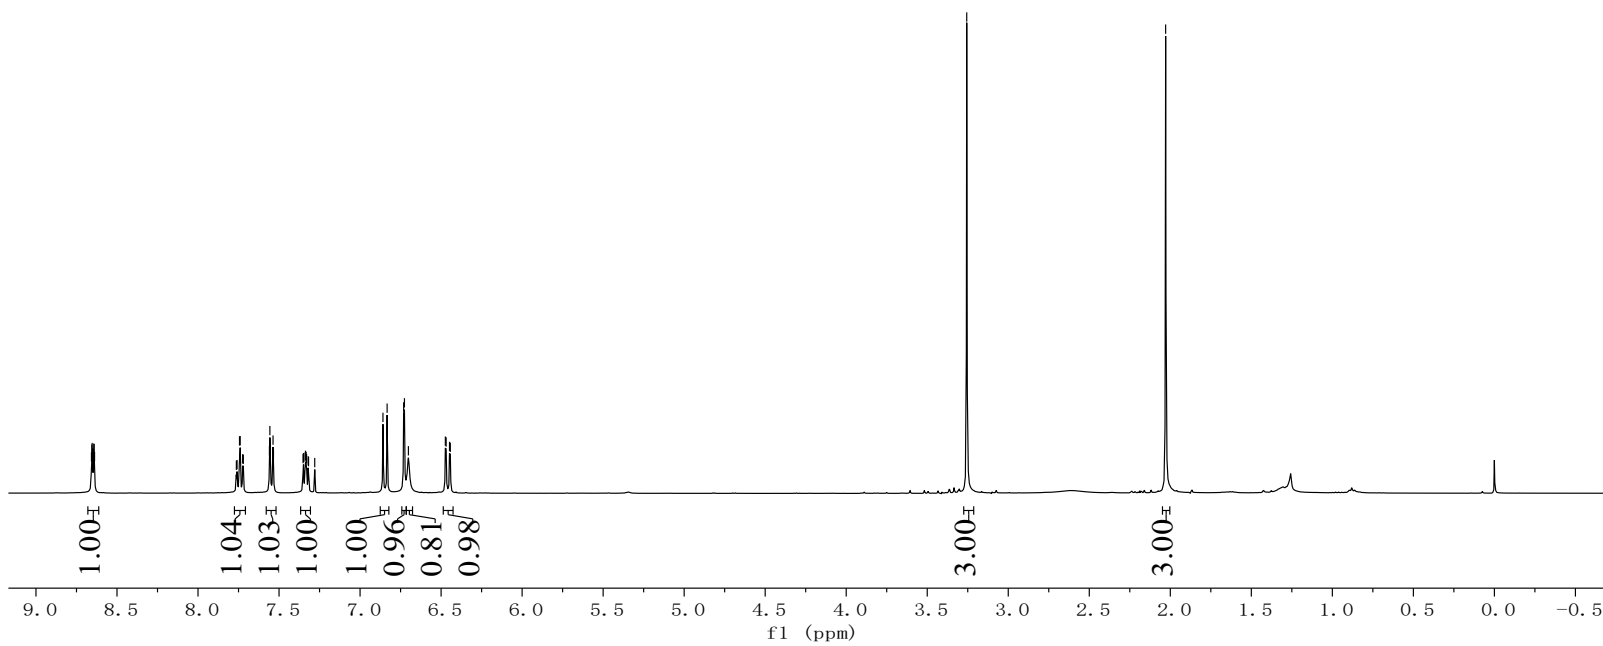

C-Py[0]-C. 1. 1. 1r  
13C

— 184.37

— 169.03

150.29

144.92

141.87

138.16

136.57

135.71

130.82

128.04

124.07

— 98.53

~ 83.42

~ 80.56

— 51.00

— 23.54

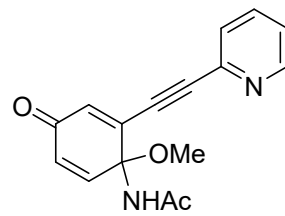

**18**

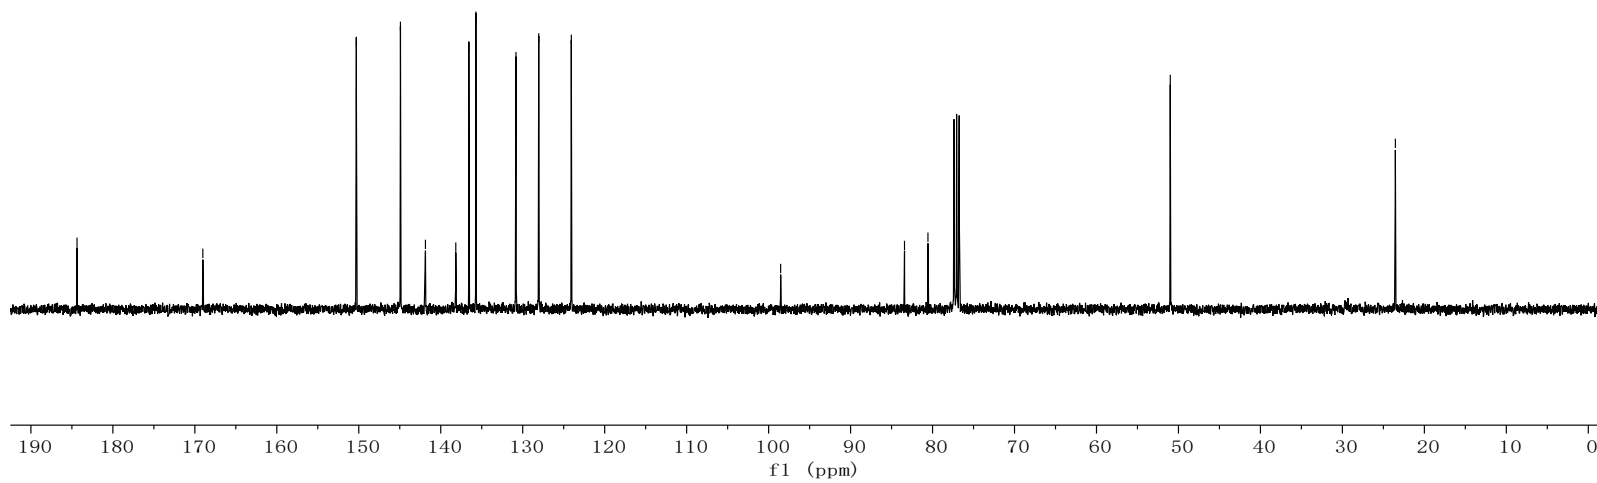

C-nBu[0]. 1. 1. 1r  
1H

6.94  
6.92  
6.50  
6.50  
6.41  
6.41  
6.39  
6.38  
6.24

3.19  
2.48  
2.46  
2.44  
2.00  
1.61  
1.59  
1.57  
1.55  
1.48  
1.47  
1.45  
1.45  
1.43  
0.97  
0.95  
0.93

|||  
|||

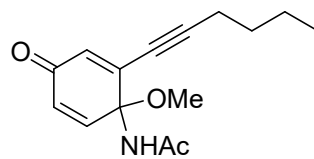

19

|||  
|||  
|||  
|||  
|||

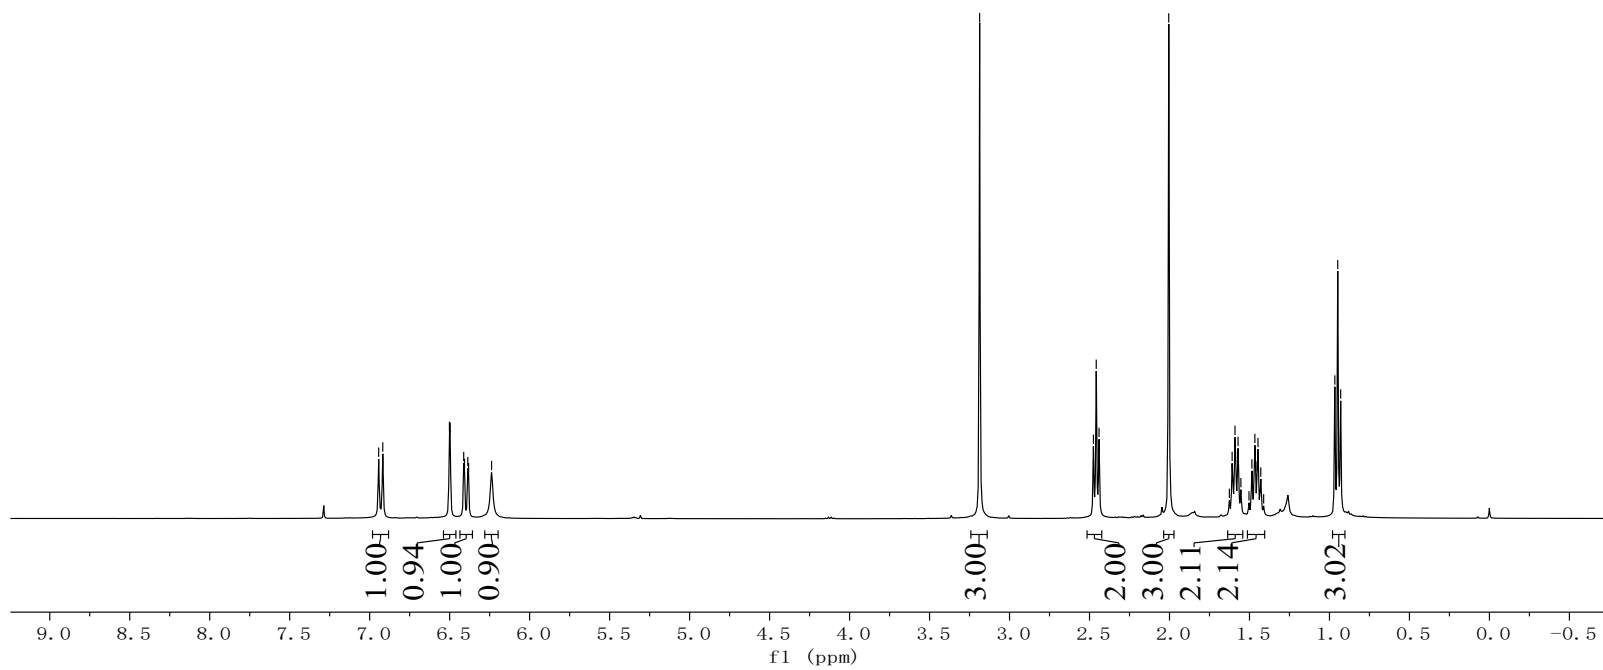



C-nBu[0]-C. 1. 1. 1r  
13C

- 184.82

- 168.74

- 144.34

- 139.51

~ 134.19

- 130.67

- 103.75

- 80.37

- 75.87

- 50.94

~ 30.26

~ 23.66

- 21.95

~ 19.57

~ 13.54

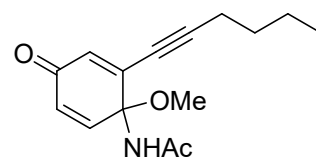

**19**

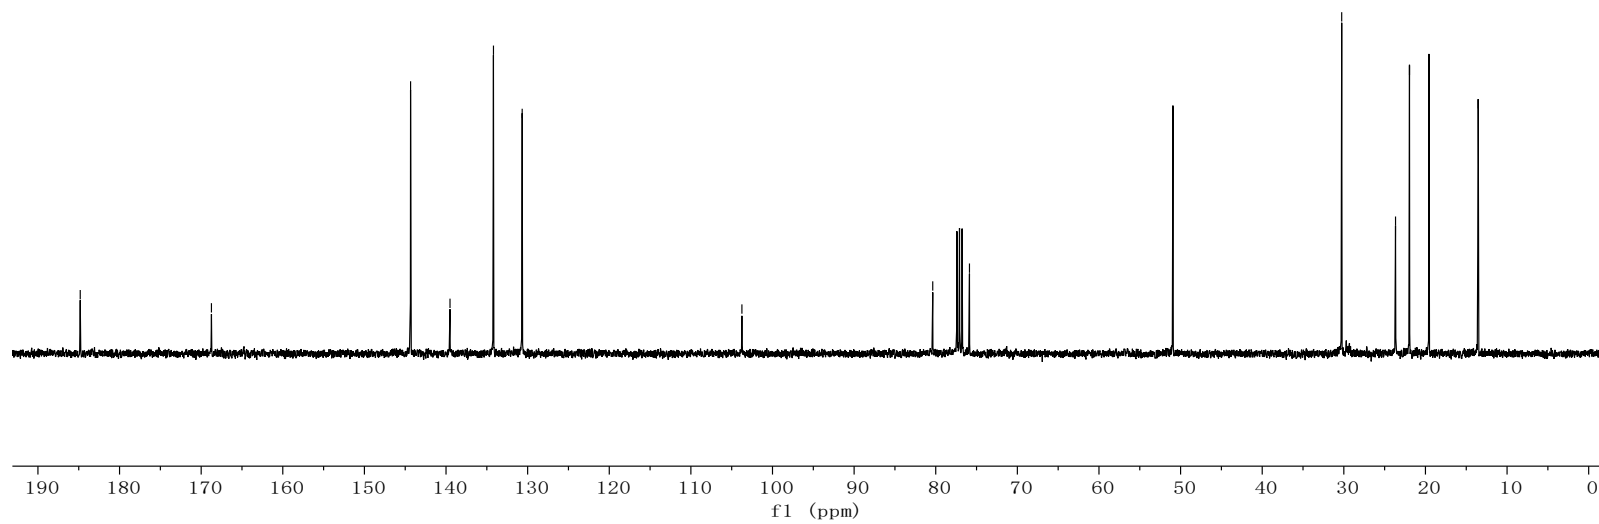

C-C12[0]. 1. 1. 1r  
GC 0422

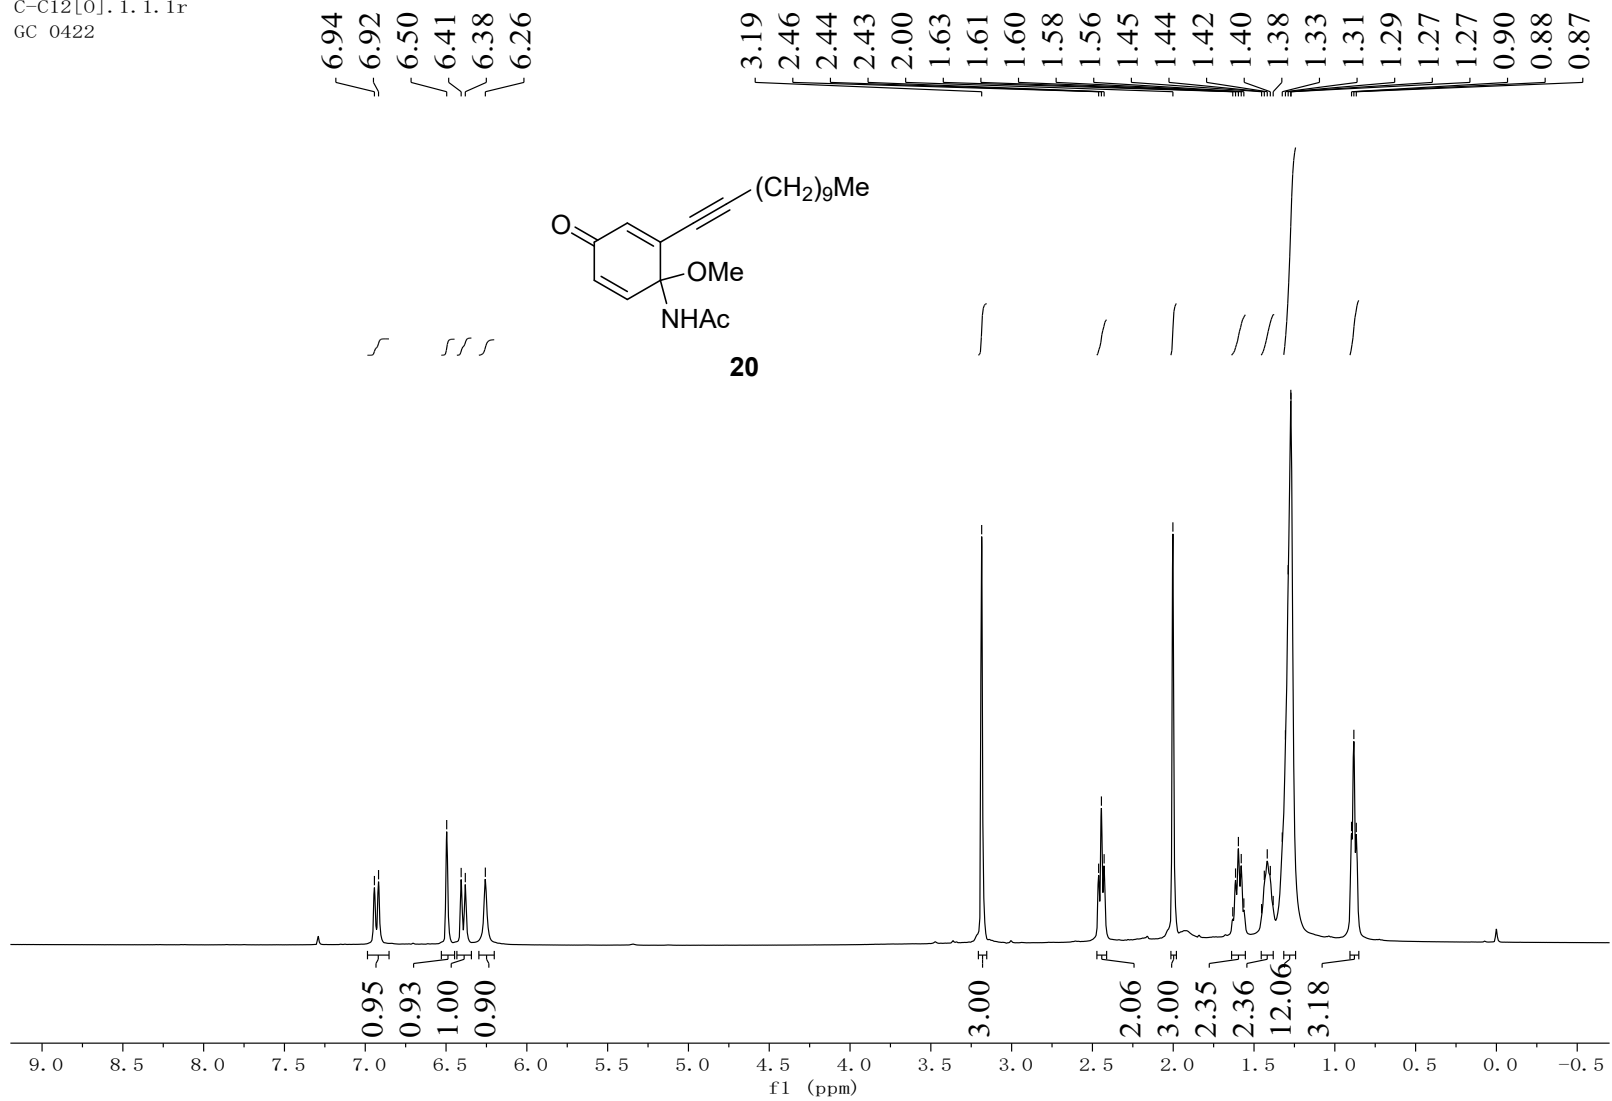

C-C12[0]-C. 1. 1. 1r  
13C

- 184.79

- 168.73

- 144.27

- 139.46

- 134.20

- 130.67

- 103.83

- 80.36

- 75.84

- 50.96

31.87

29.56

29.52

29.29

29.08

28.90

28.27

23.70

22.66

19.90

14.09

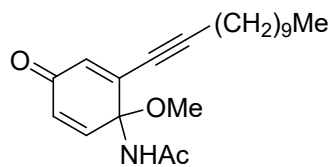

20

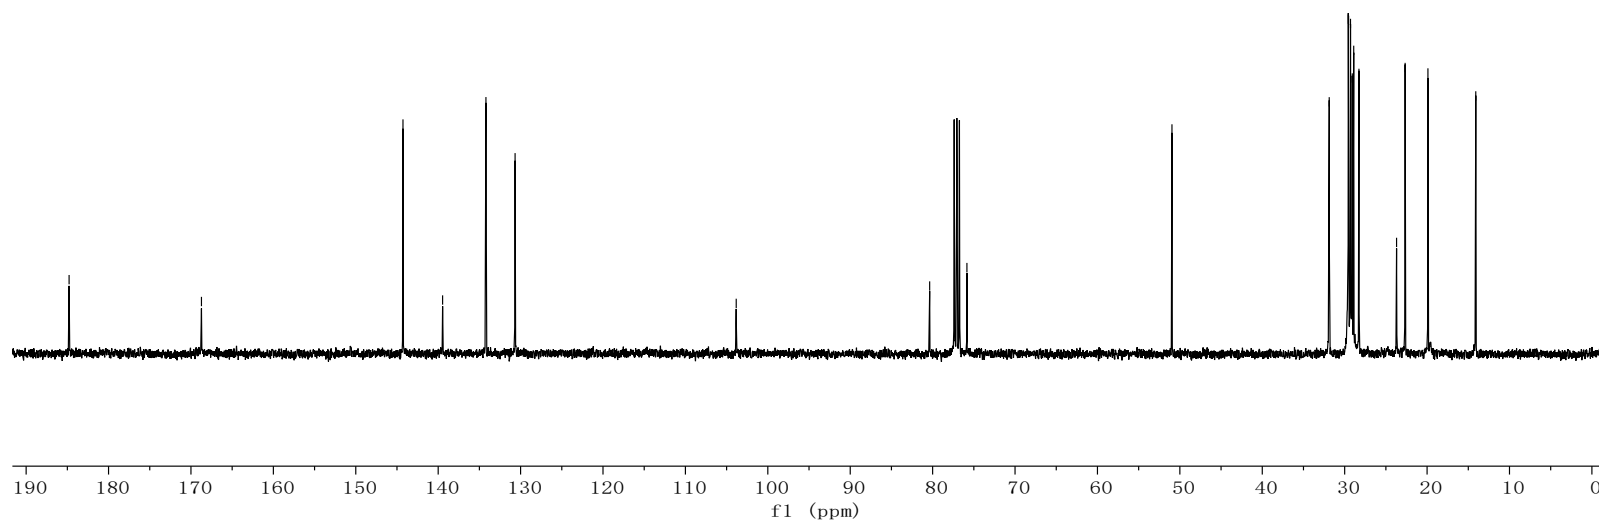

C-tBu[0]. 1. 1. 1r  
1H

6.91  
6.89  
6.48  
6.48  
6.41  
6.40  
6.38  
6.38  
6.23

/ // /

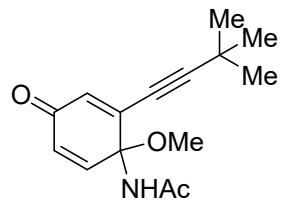

21

3.17  
2.00  
1.31

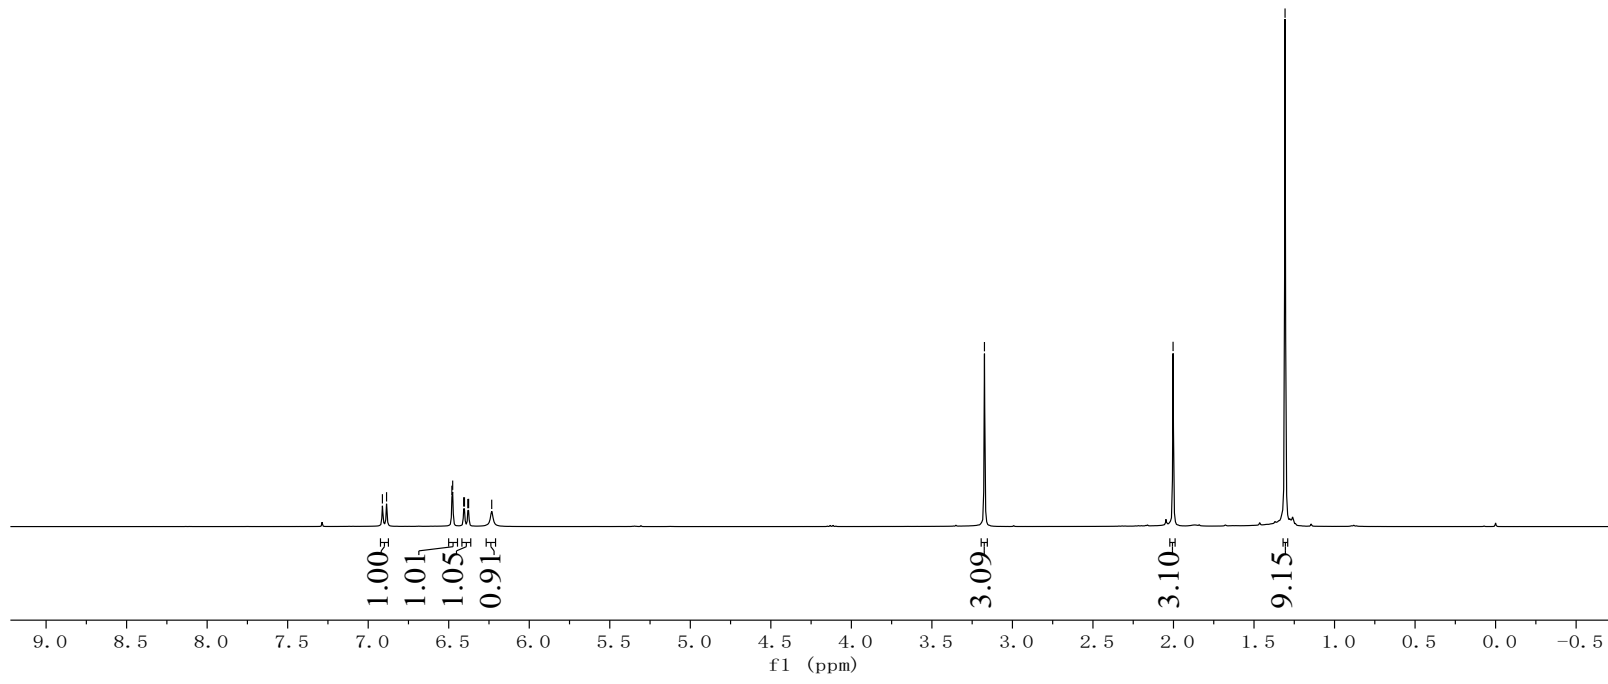

C-tBu[0]-C. 1. 1. 1r  
13C

- 184.85

- 168.73

- 144.41

- 139.46

- 133.88

- 130.66

- 111.58

- 80.34

- 74.36

- 50.84

- 30.56

- 28.53

- 23.58

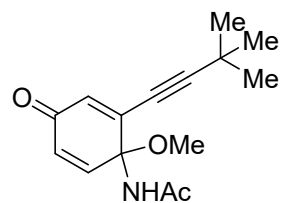

21

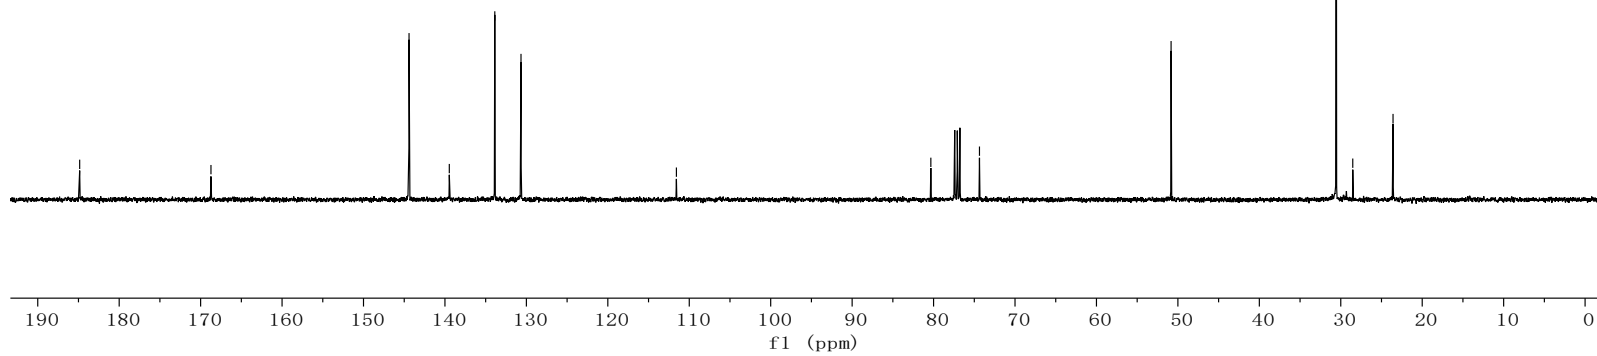

C-cH[0].1.1.1r

<sup>1</sup>H

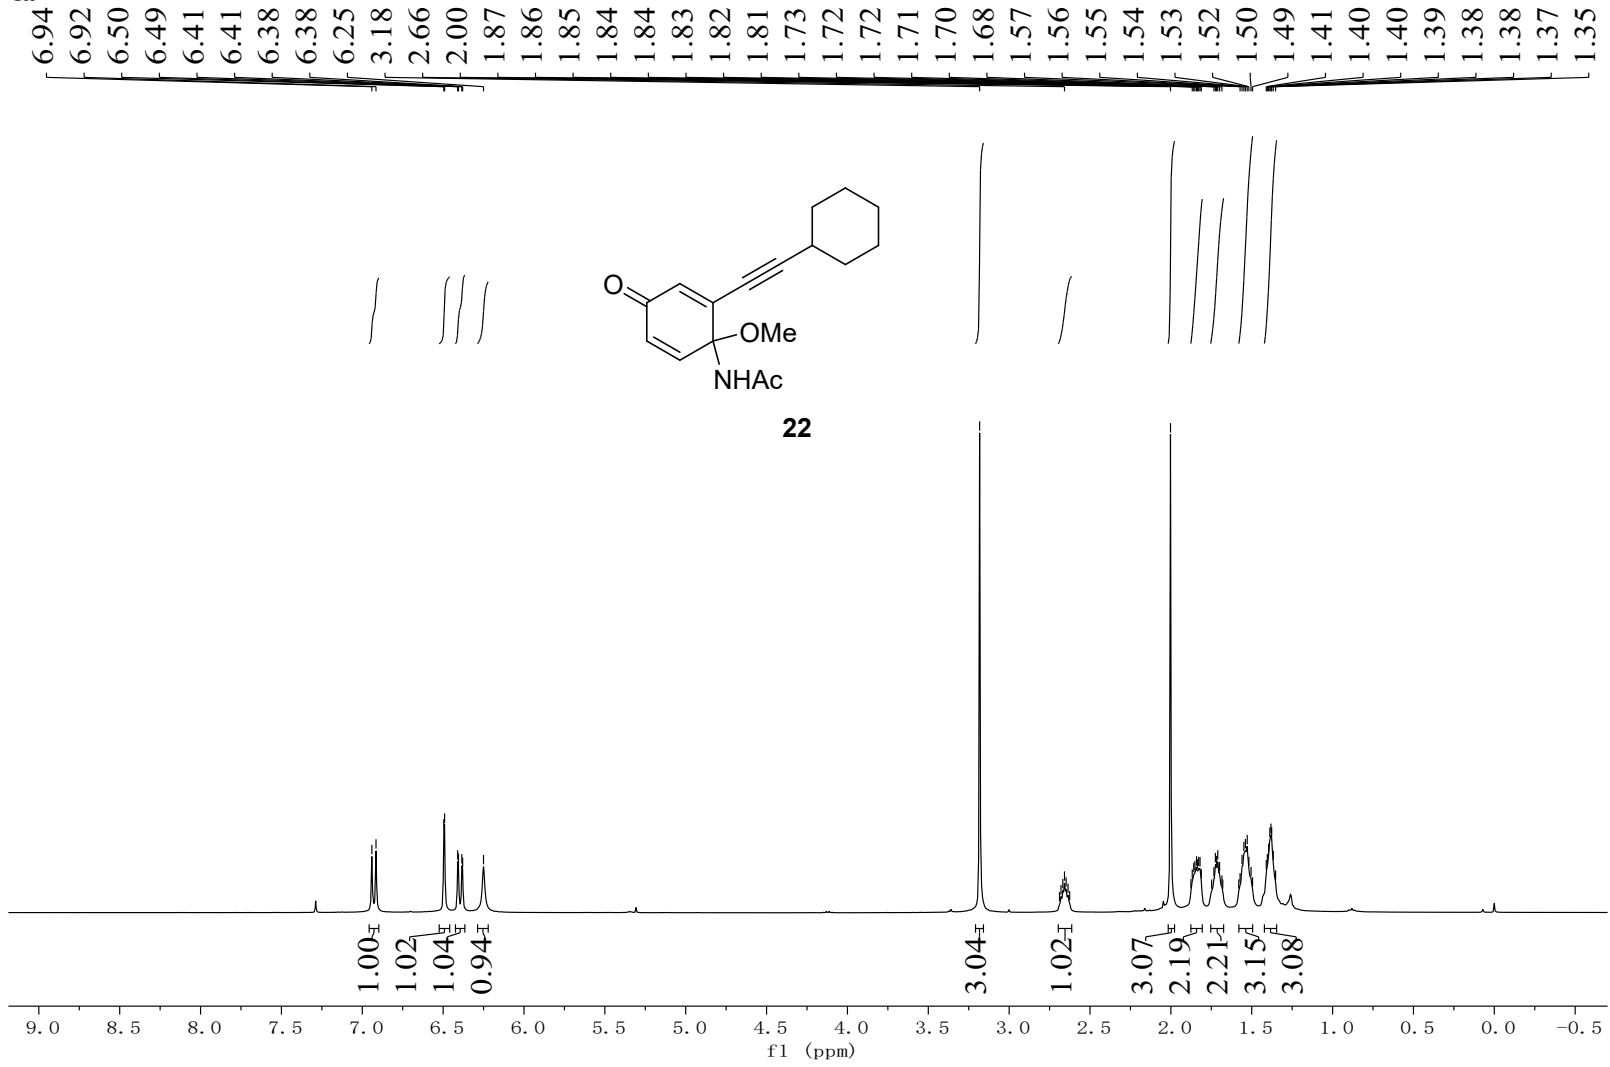

C-cH[0]-C. 1. 1. 1r  
13C

- 184.87

- 168.77

- 144.39

- 139.57

- 133.94

- 130.65

- 107.67

- 80.36

- 75.98

- 50.90

- 32.10

- 29.91

- 25.71

- 24.56

- 23.64

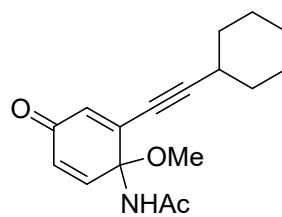

**22**

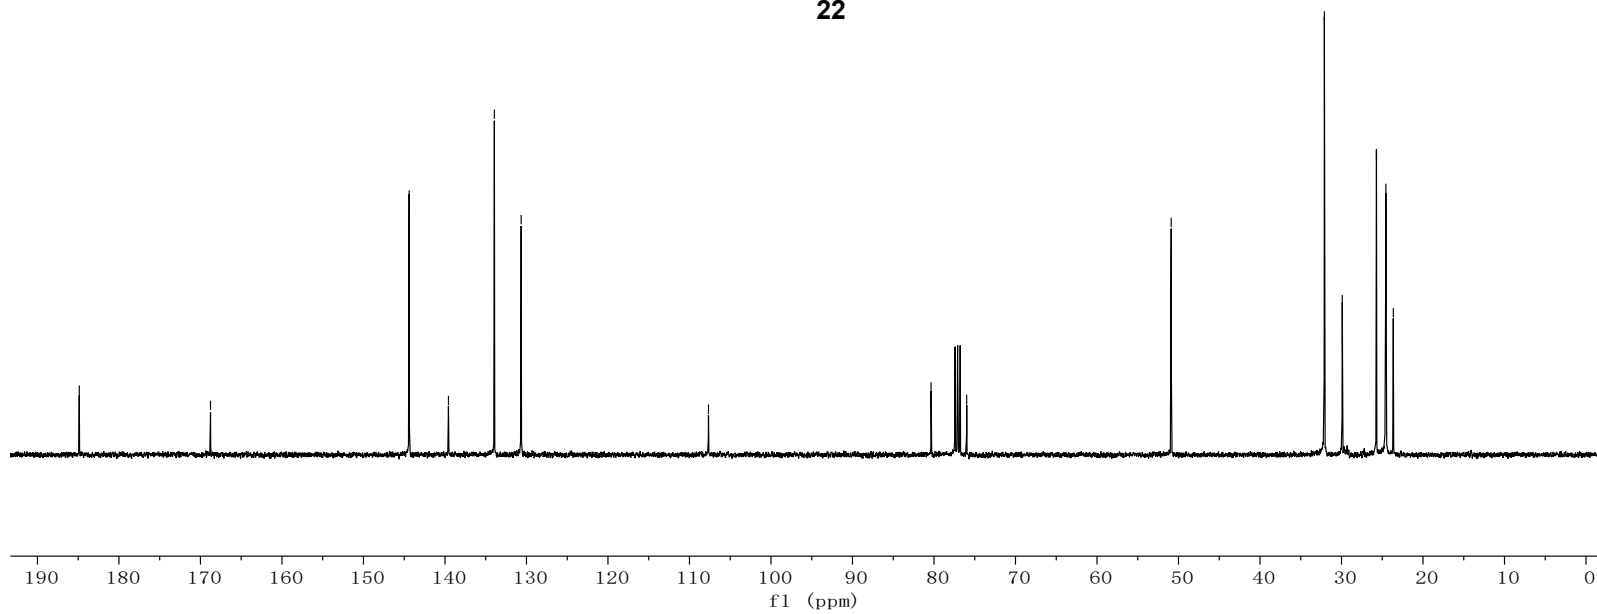

C-cPro[0]. 1. 1. 1r  
1H

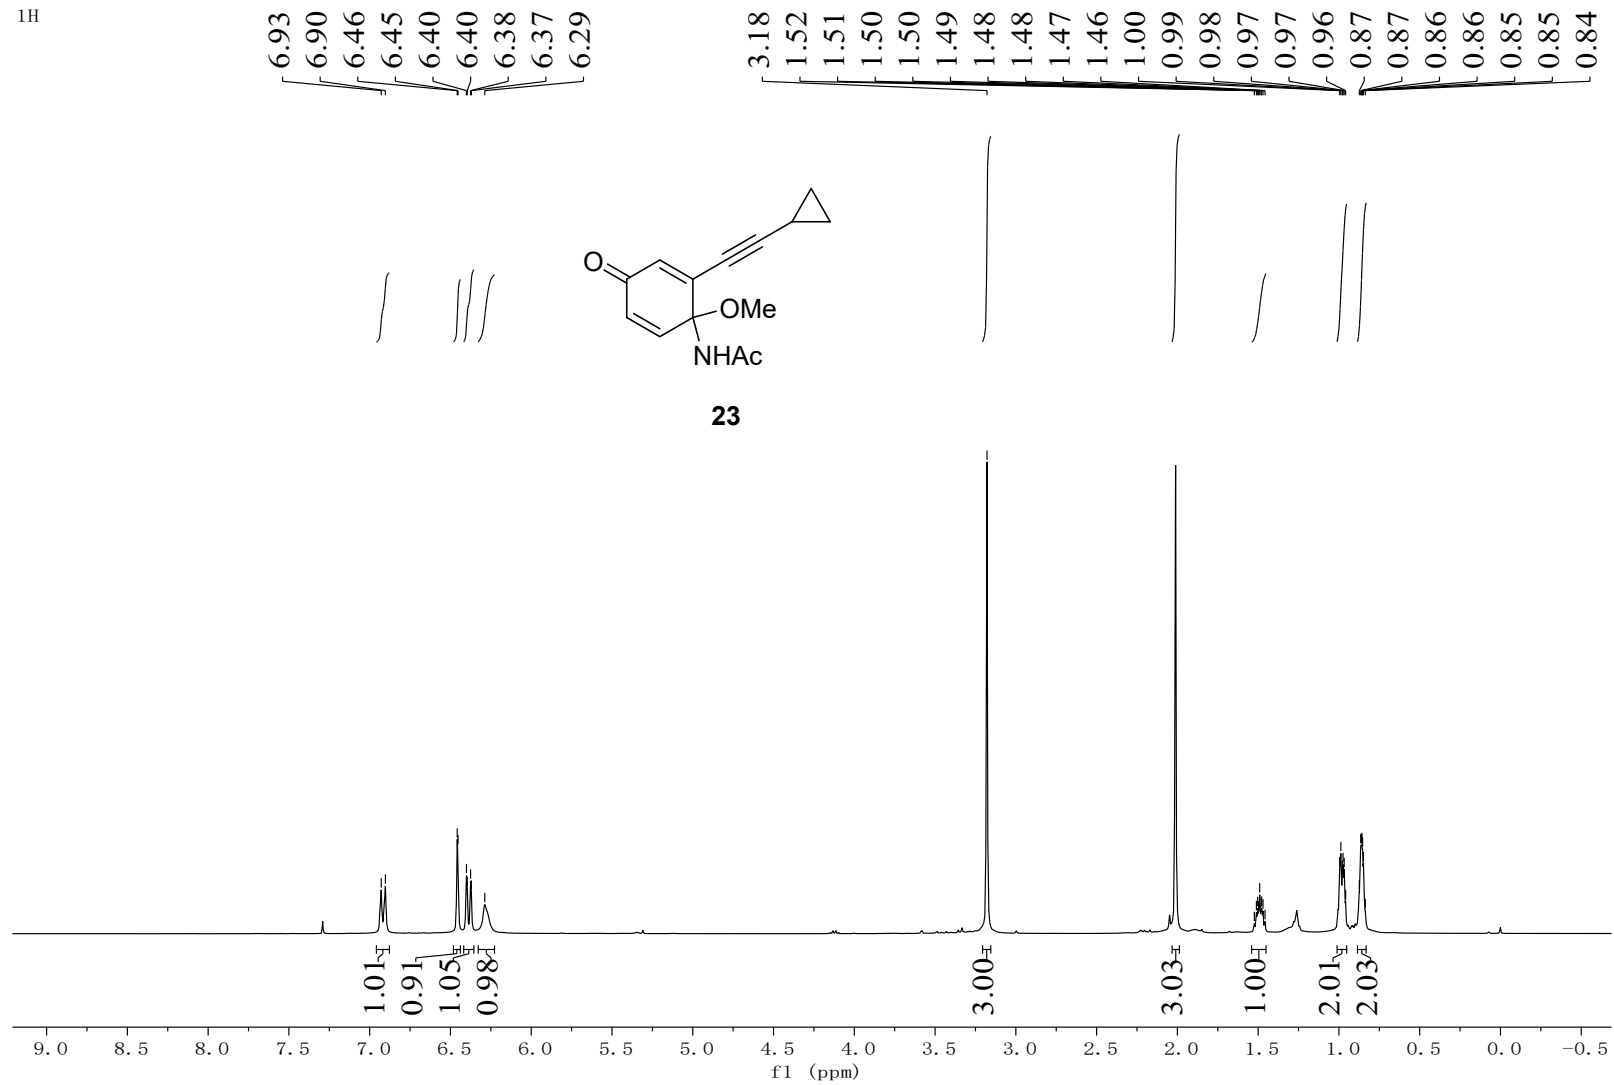



C-cPro[0]-C. 1. 1. 1r  
13C

- 184.80

- 168.83

- 144.33

- 139.61

- 133.83

- 130.67

- 107.31

- 80.39

- 71.14

- 50.95

- 23.67

- 9.71

- 0.76

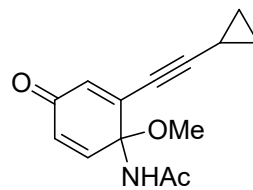

23

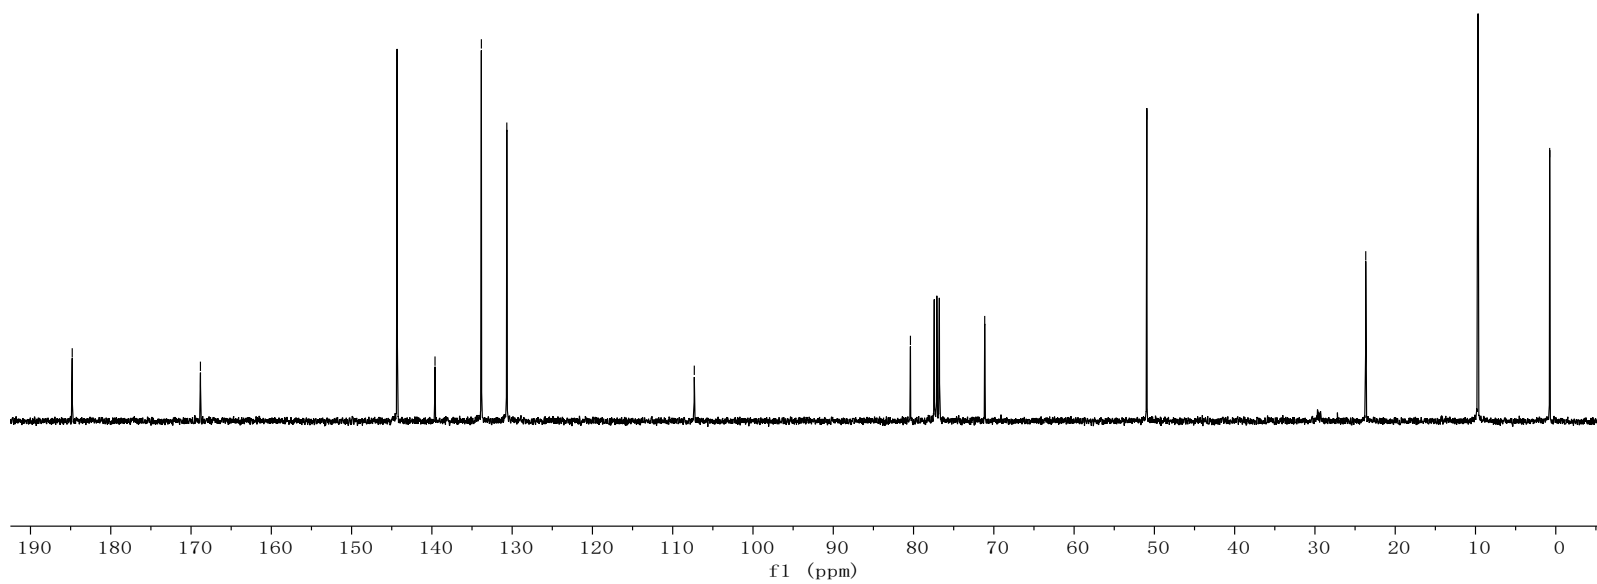

C-TMS[0]-NEW. 1. 1. 1r

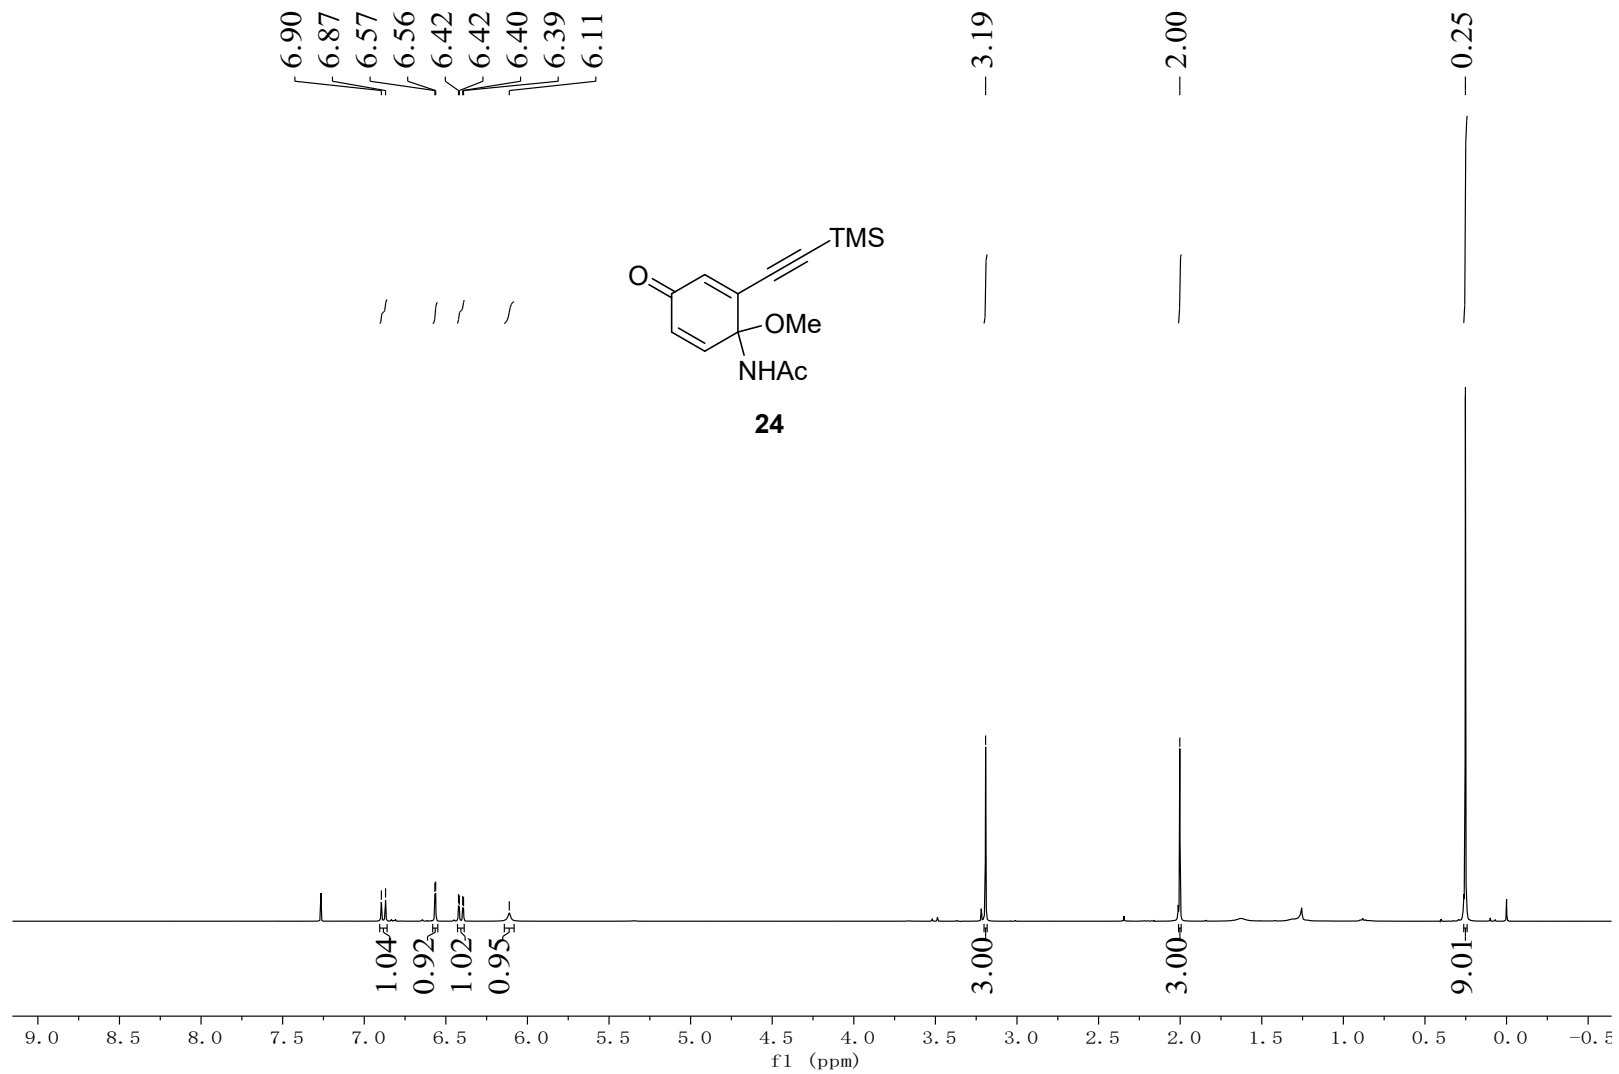

C-TMS[0]-C. 1. 1. 1r

- 184.57

- 168.67

- 144.36

- 138.37

- 135.22

- 130.75

- 108.09

- 98.80

- 80.23

- 50.96

- 23.61

- -0.37

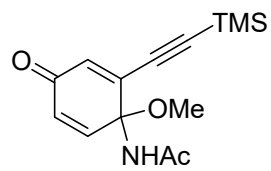

24

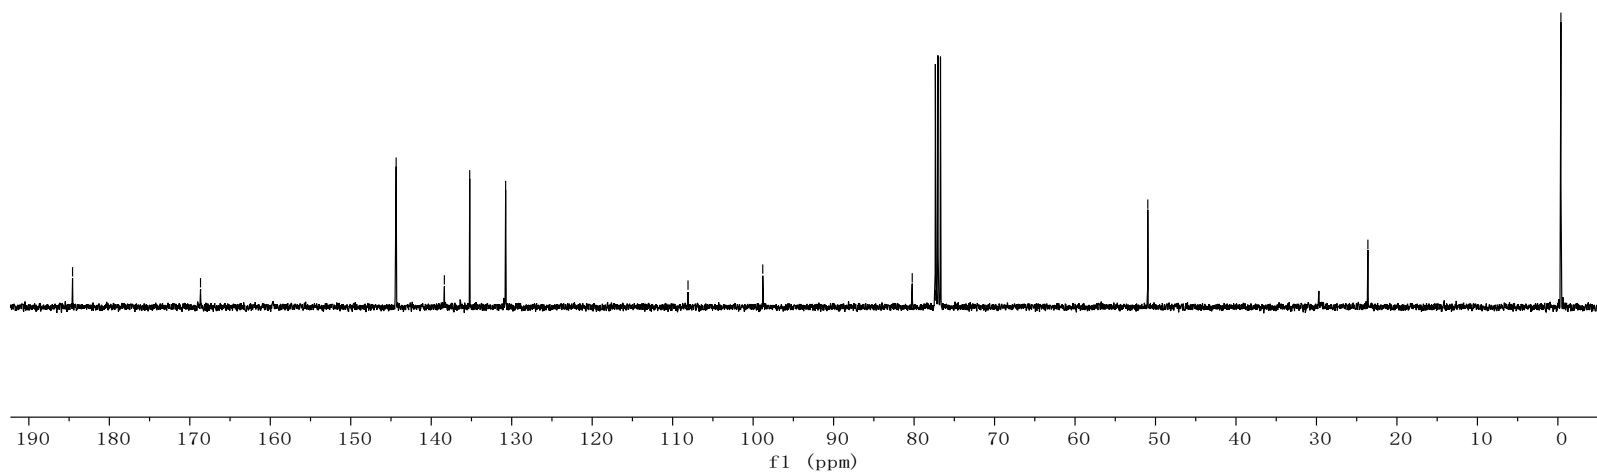

C-4Cl[0]. 1. 1. 1r

<sup>1</sup>H

7.59  
7.59  
7.57  
7.57  
7.45  
7.43  
7.42  
7.40  
6.91  
6.89  
6.56  
6.53  
6.35

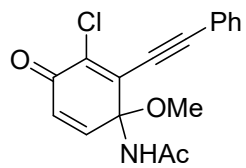

26

3.25

2.02

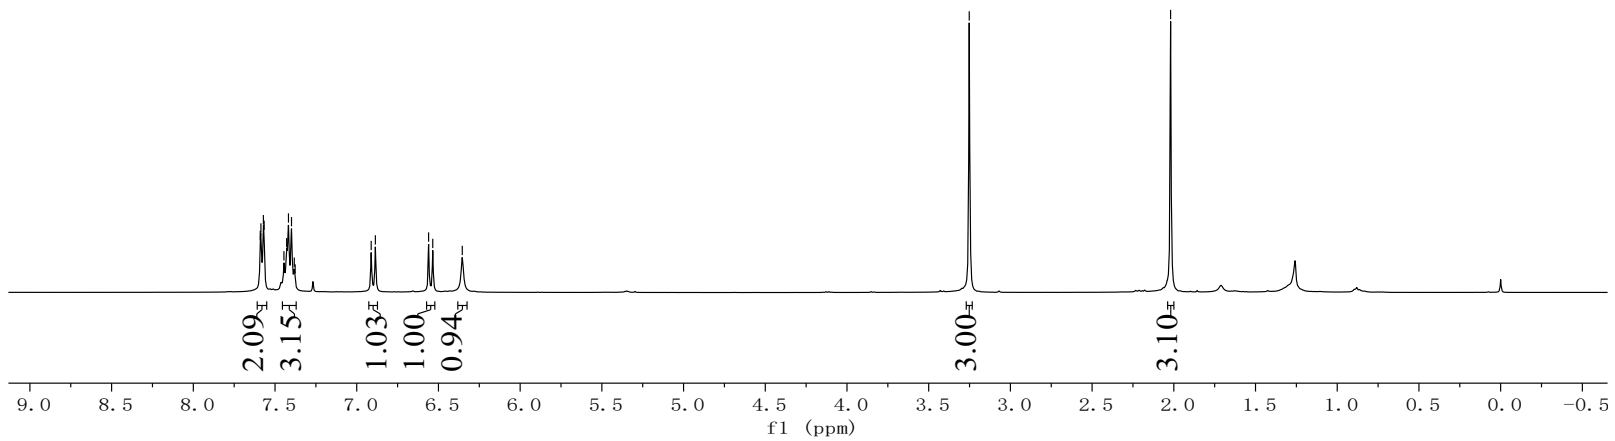

C-4Cl[0]-C. 1. 1. 1r  
13C

— 177.46

— 168.70

144.77

137.74

135.68

132.30

130.26

129.81

128.67

128.67

121.49

— 107.27

82.82

82.31

— 51.18

— 23.57

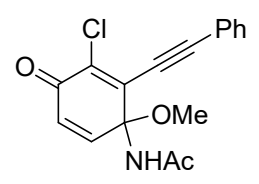

**26**

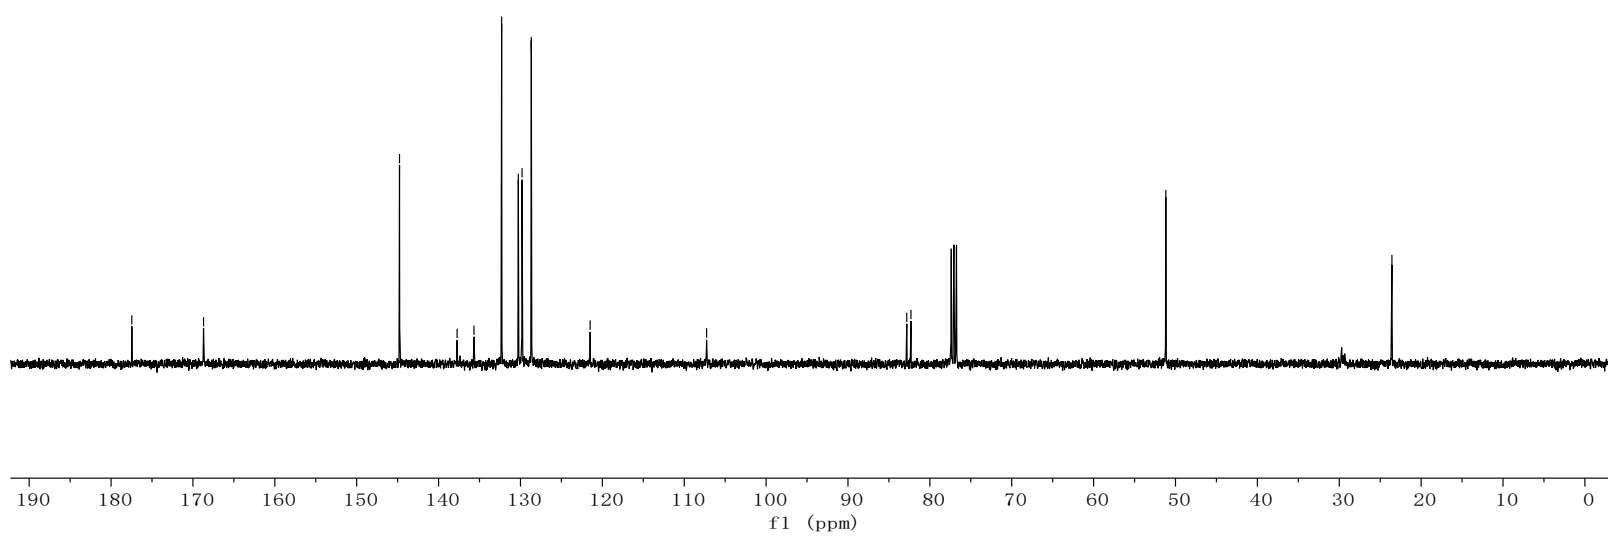

C-4Br[O]-NEW. 1. 1. 1r  
1H

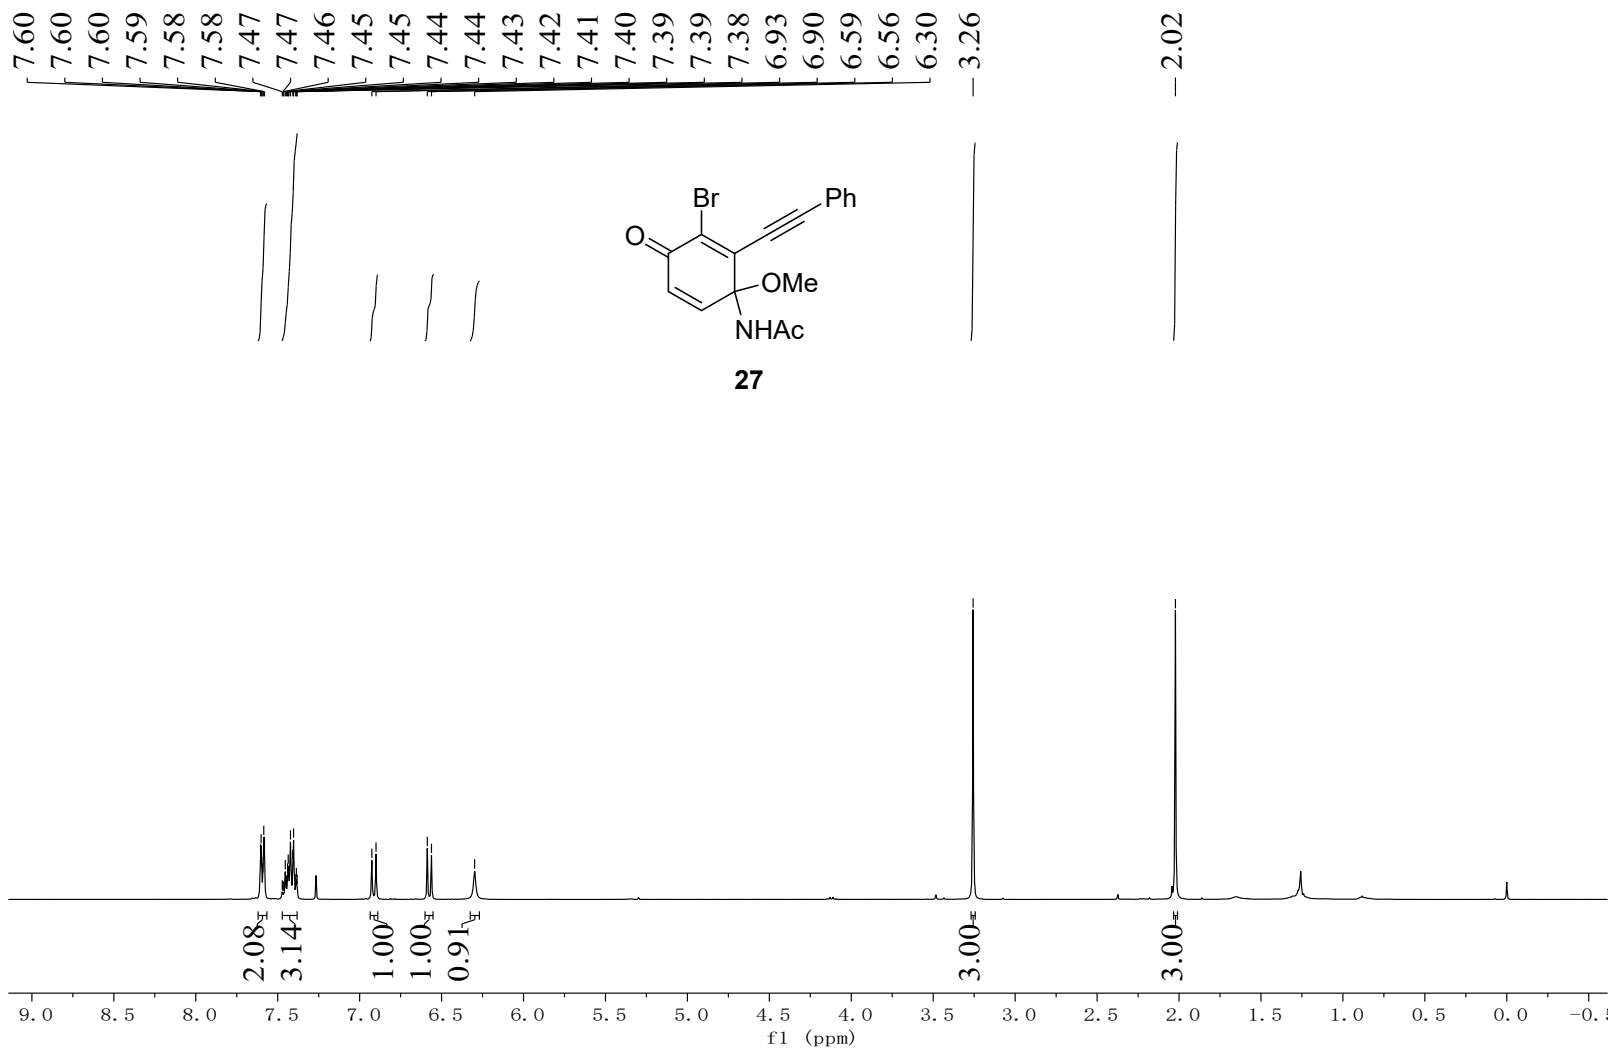

C-4Br[0]-C-NEW. 1. 1. 1r  
13C

— 177.48

— 168.64

144.58

139.35

132.28

131.40

130.30

129.42

128.69

121.52

— 106.62

~ 84.99

~ 82.43

— 51.23

— 23.60

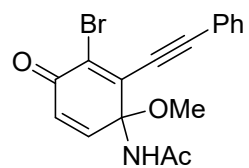

**27**

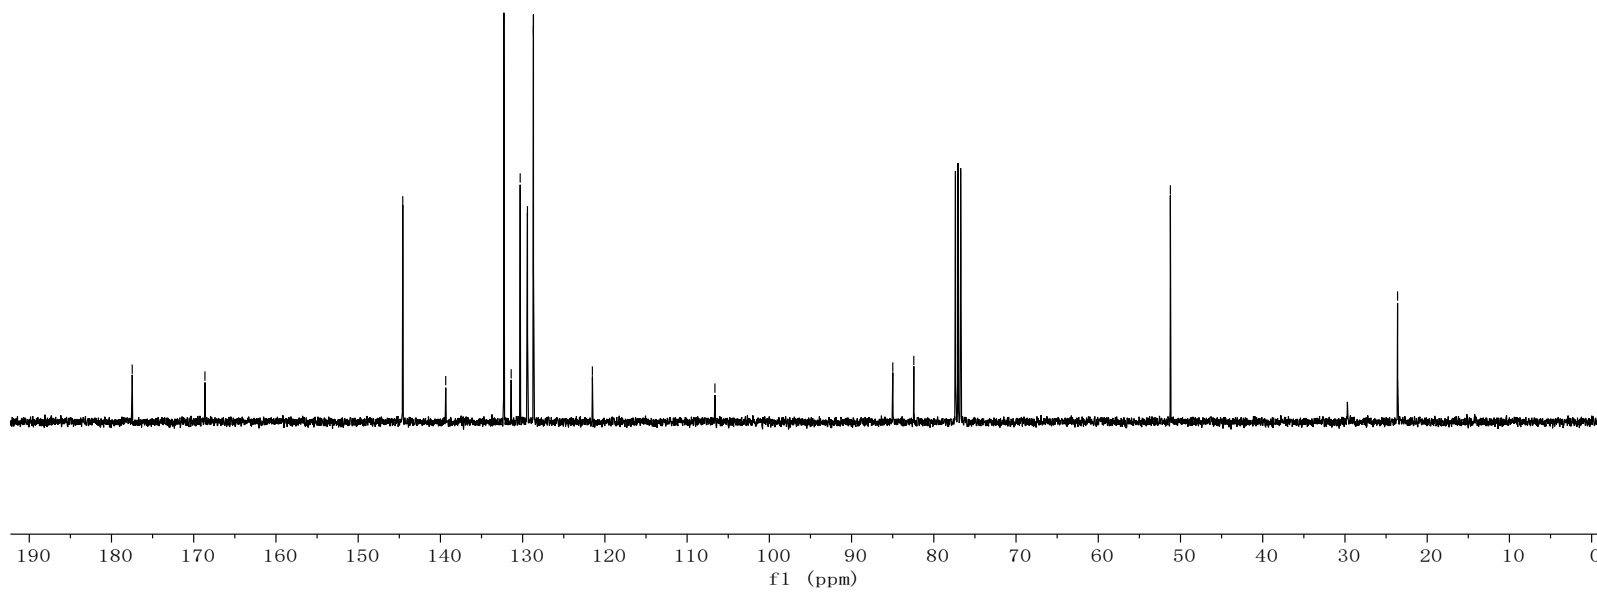

C-7Cl[0]-NEW. 11. 1. 1r

<sup>1</sup>H

7.54  
7.53  
7.52  
7.51  
7.44  
7.42  
7.42  
7.41  
7.39  
7.39  
7.08  
6.74  
6.21

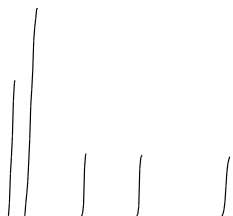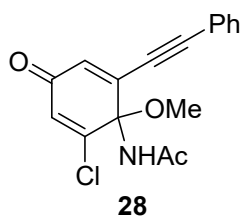

3.28

2.03

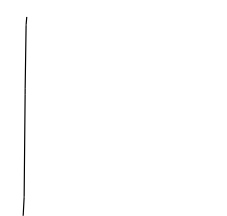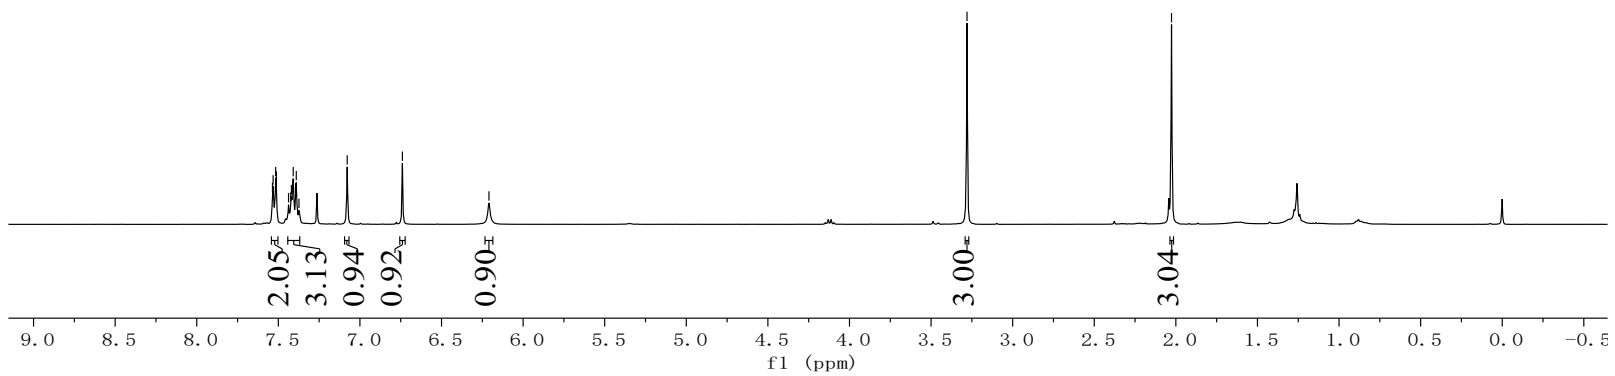



C-7Cl[0]-C-NEW. 1. 1. 1r  
13C

— 177.62

— 168.65

140.71

139.49

134.75

133.29

132.22

130.15

128.67

121.29

— 102.16

83.53

82.14

— 51.32

— 23.60

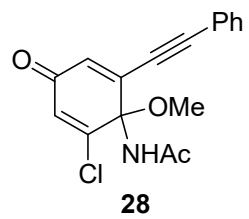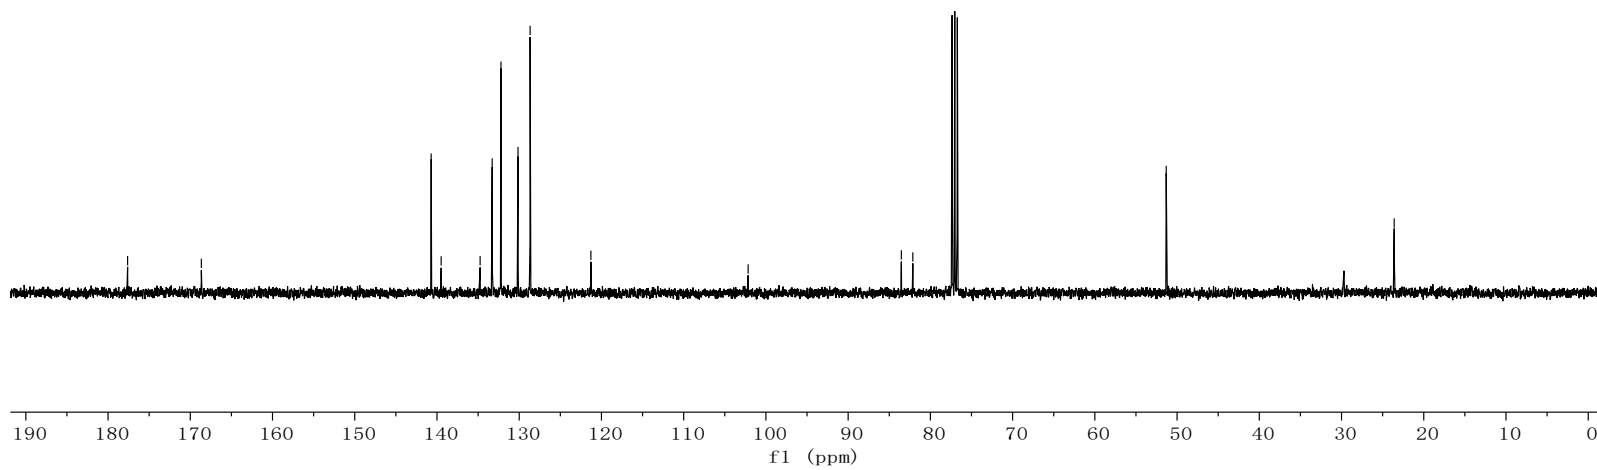

C-7Br[0]-NEW. 1. 1. 1r

<sup>1</sup>H

7.53  
7.51  
7.44  
7.42  
7.41  
7.39  
7.37  
7.34  
6.76  
6.20

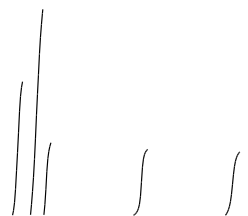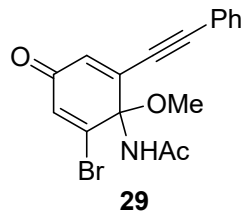

3.29  
2.03

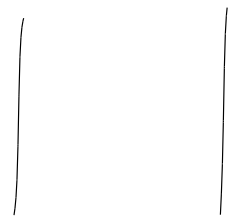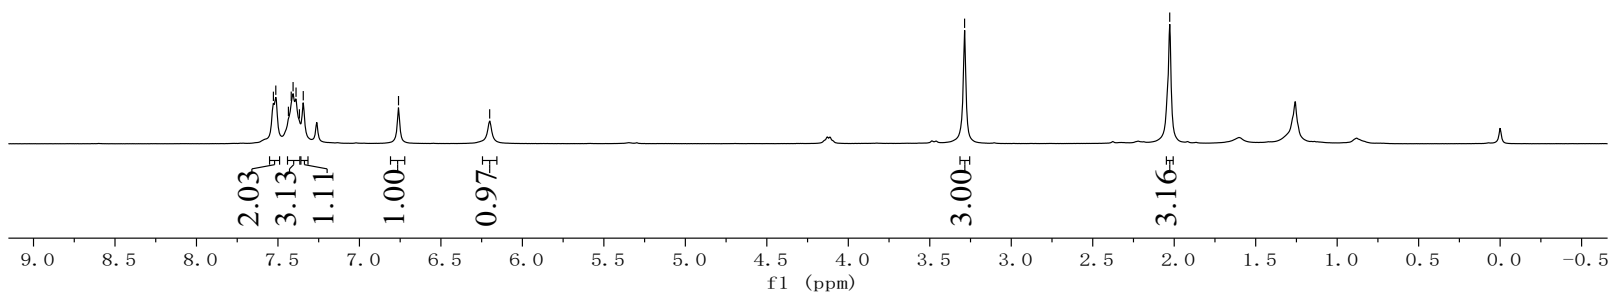

C-7Br[0]-C-NEW. 1. 1. 1r  
13C

— 177.48

— 168.63

145.10

139.37

132.80

132.22

130.14

128.67

126.41

121.29

— 102.08

83.57

82.37

— 51.37

— 23.58

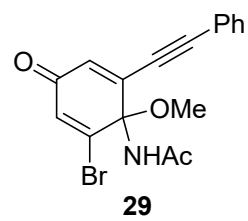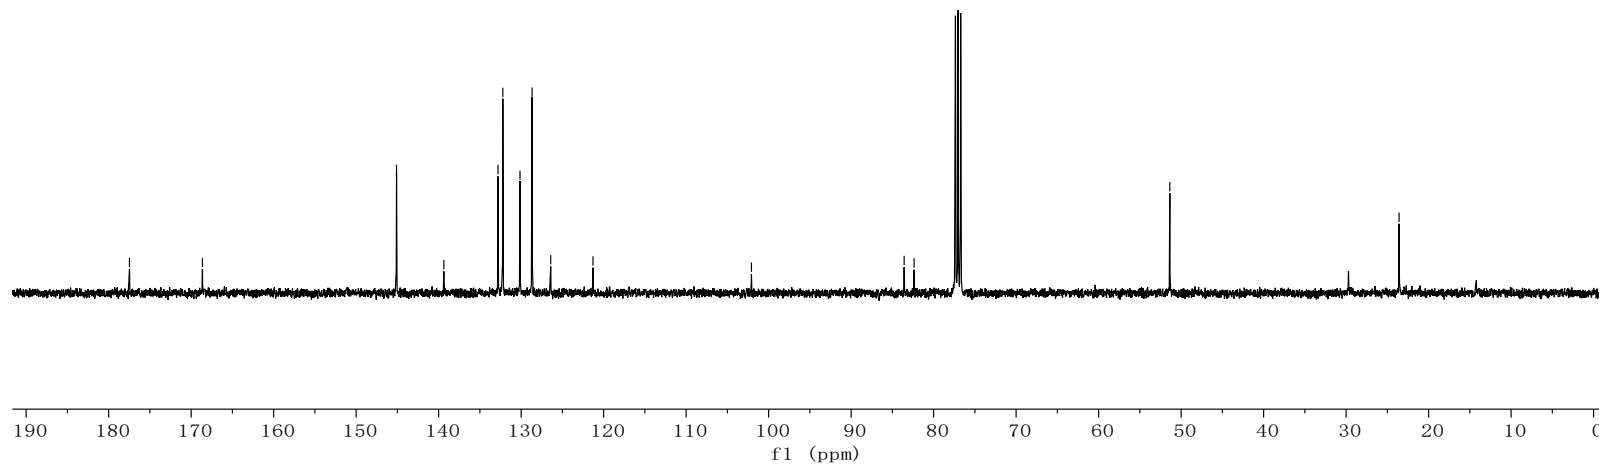

C-EP+[E].1.fid

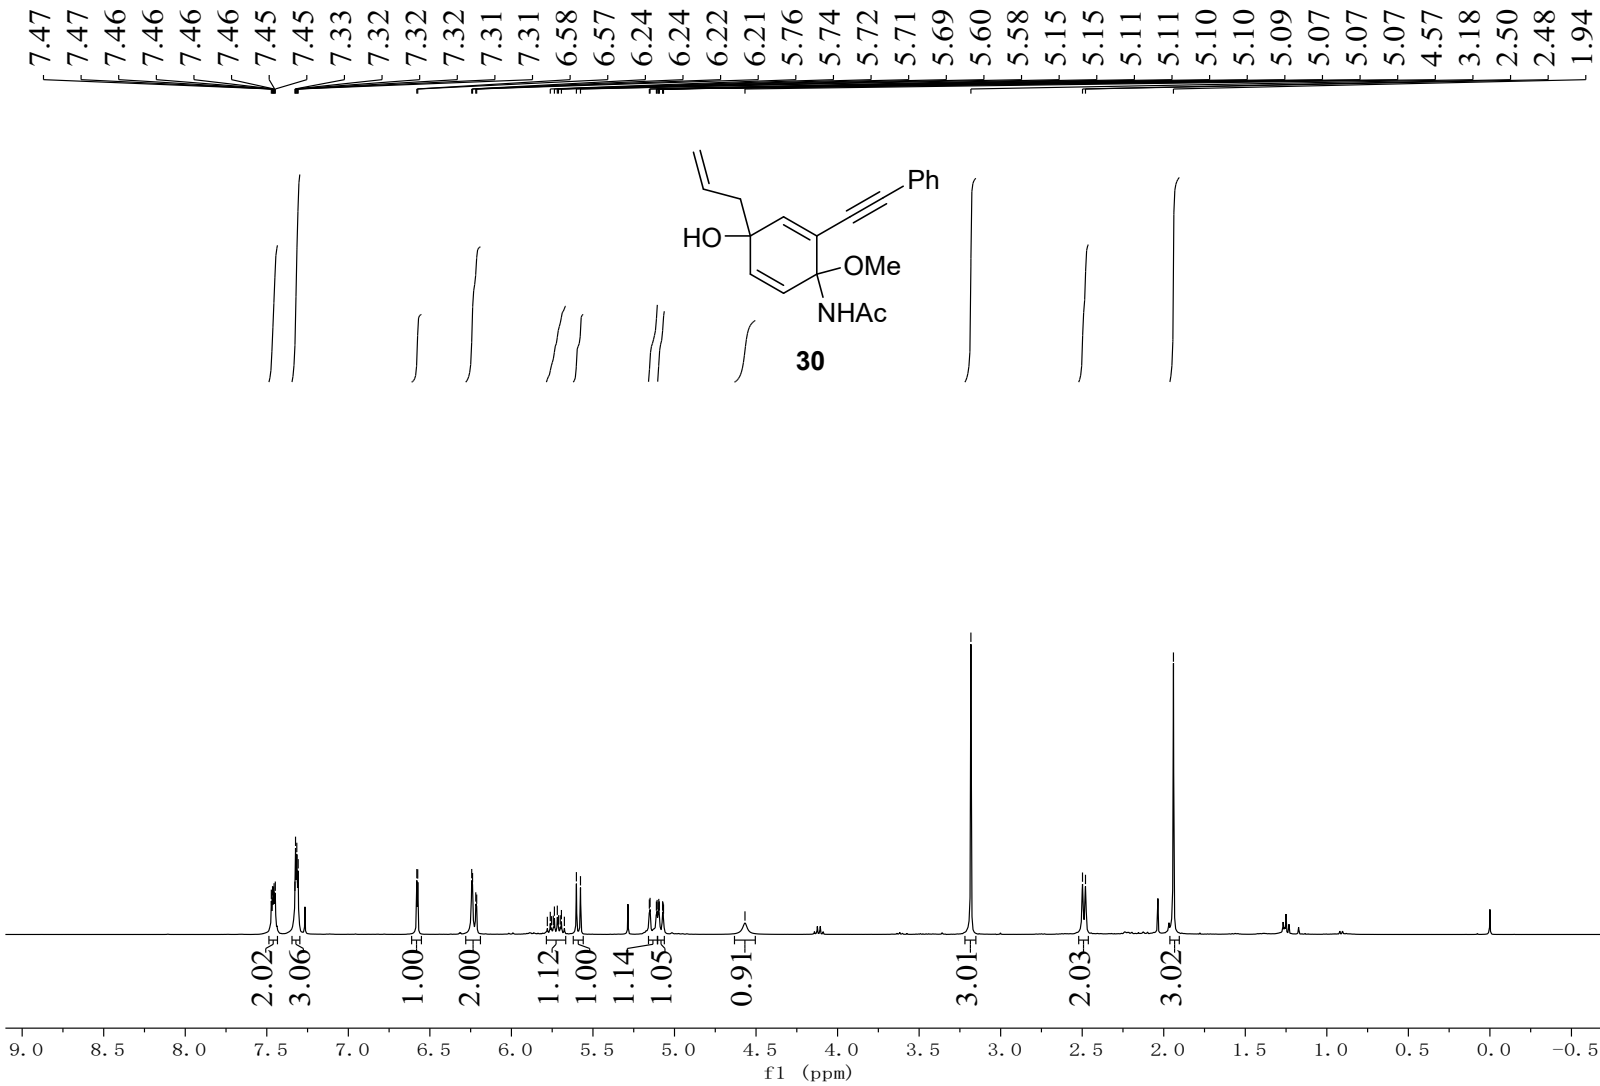

C-EP+[E]-C. 1. fid

— 168.29

144.53

138.23

132.29

131.76

128.49

128.33

127.48

122.91

122.10

118.69

~ 90.77

~ 85.13

~ 80.92

— 66.58

— 50.42

— 44.22

— 23.99

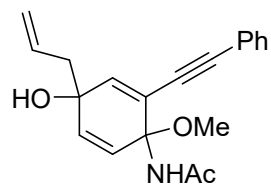

**30**

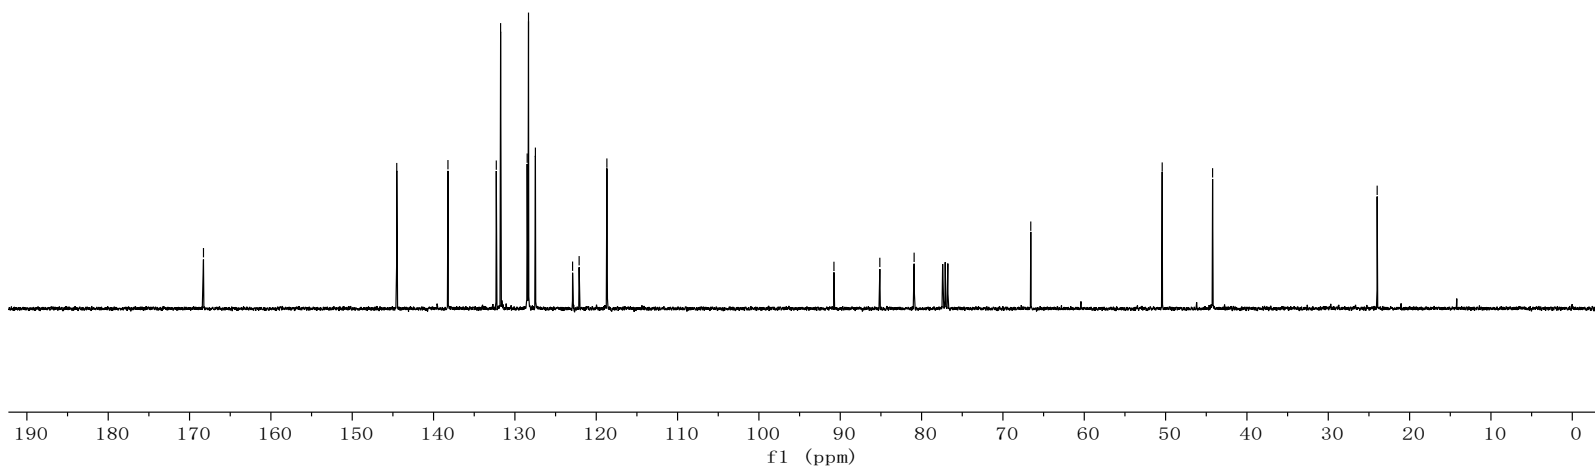

C-7E[E].1.fid

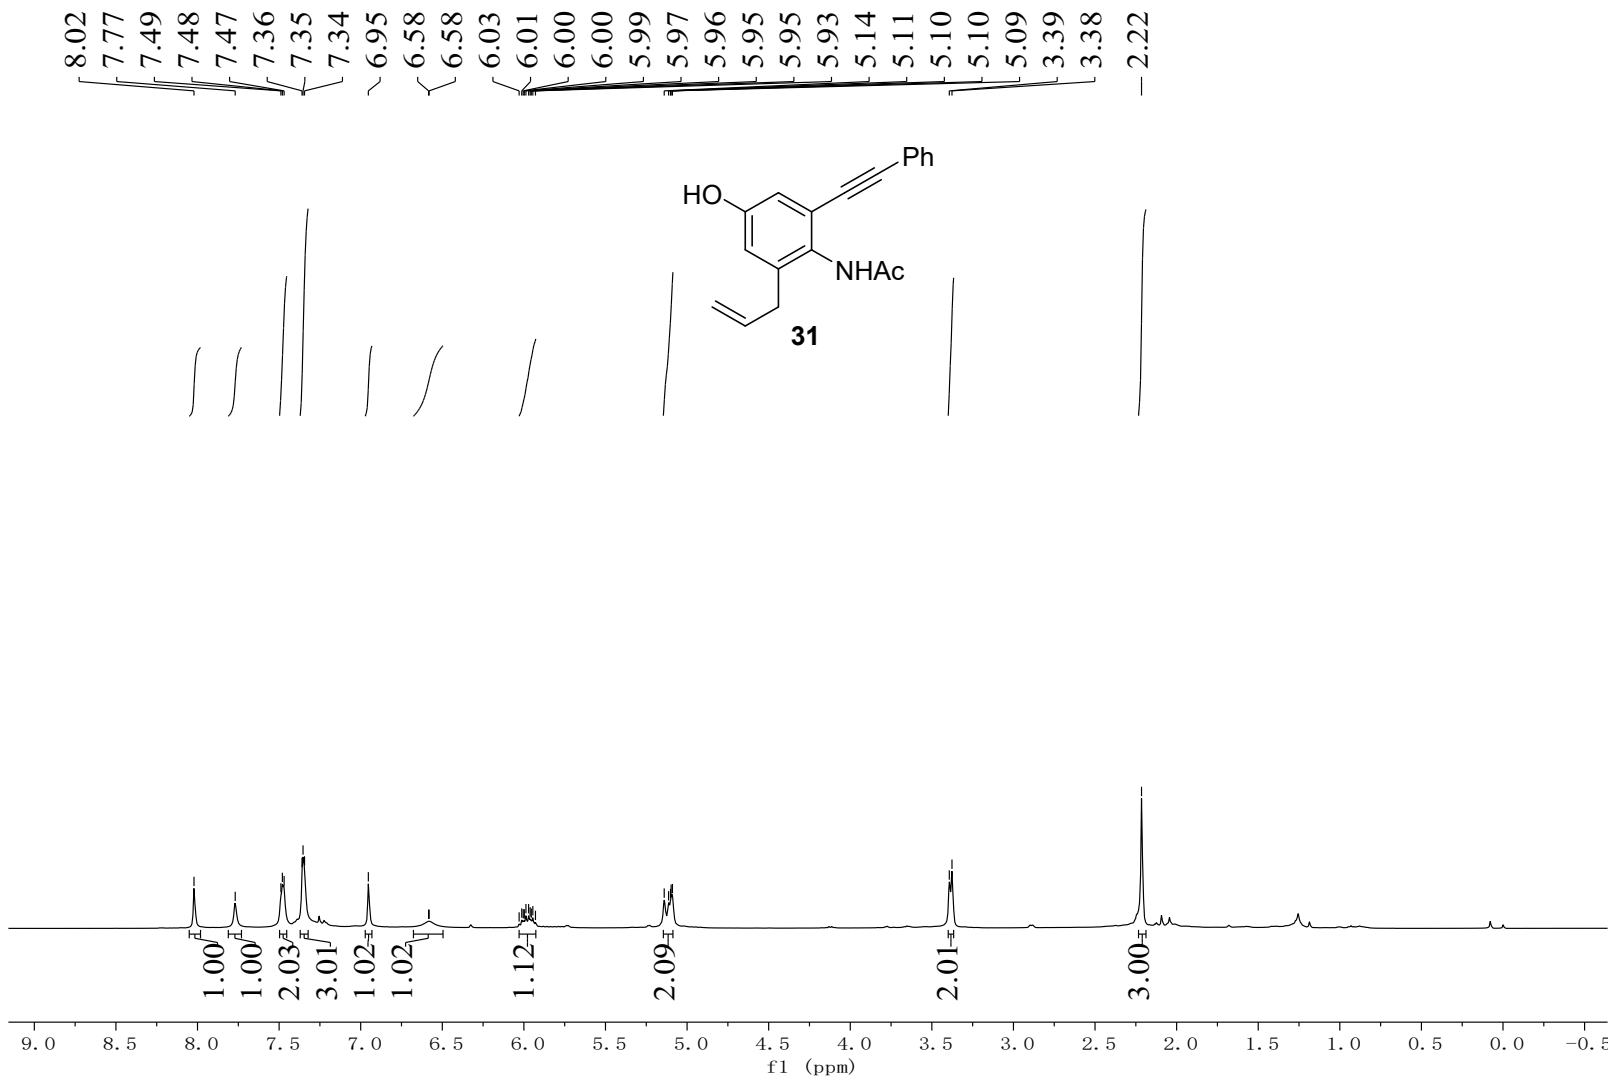

C-7E[E]-C. 1. fid

— 168.52

— 150.73

135.91

131.86

131.51

128.80

128.57

128.41

128.06

122.52

118.10

116.60

112.13

— 95.62

— 84.48

— 35.11

— 24.65

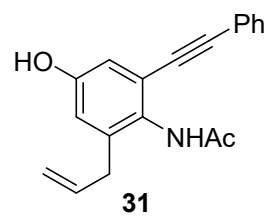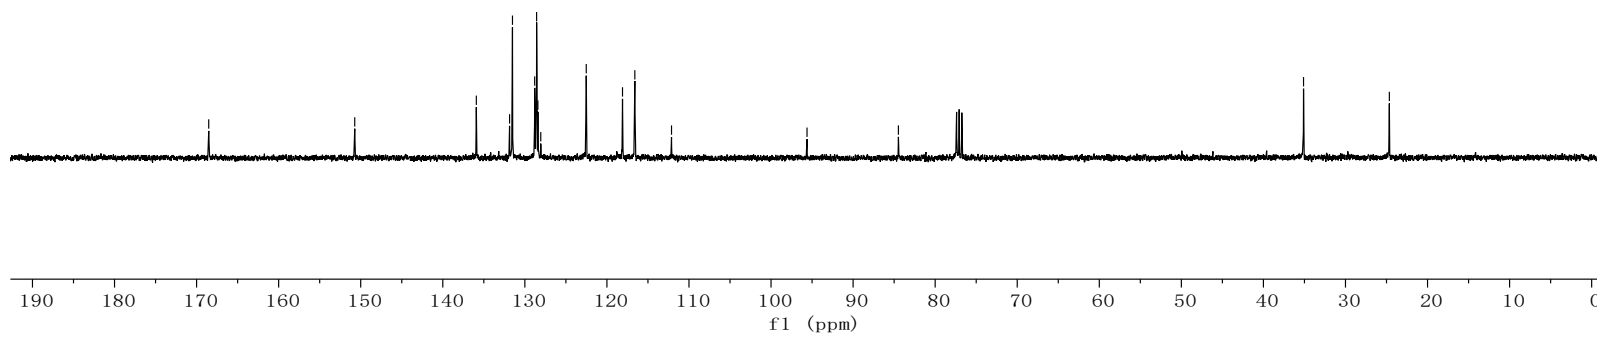

C-EP[I].1.1.1r

<sup>1</sup>H

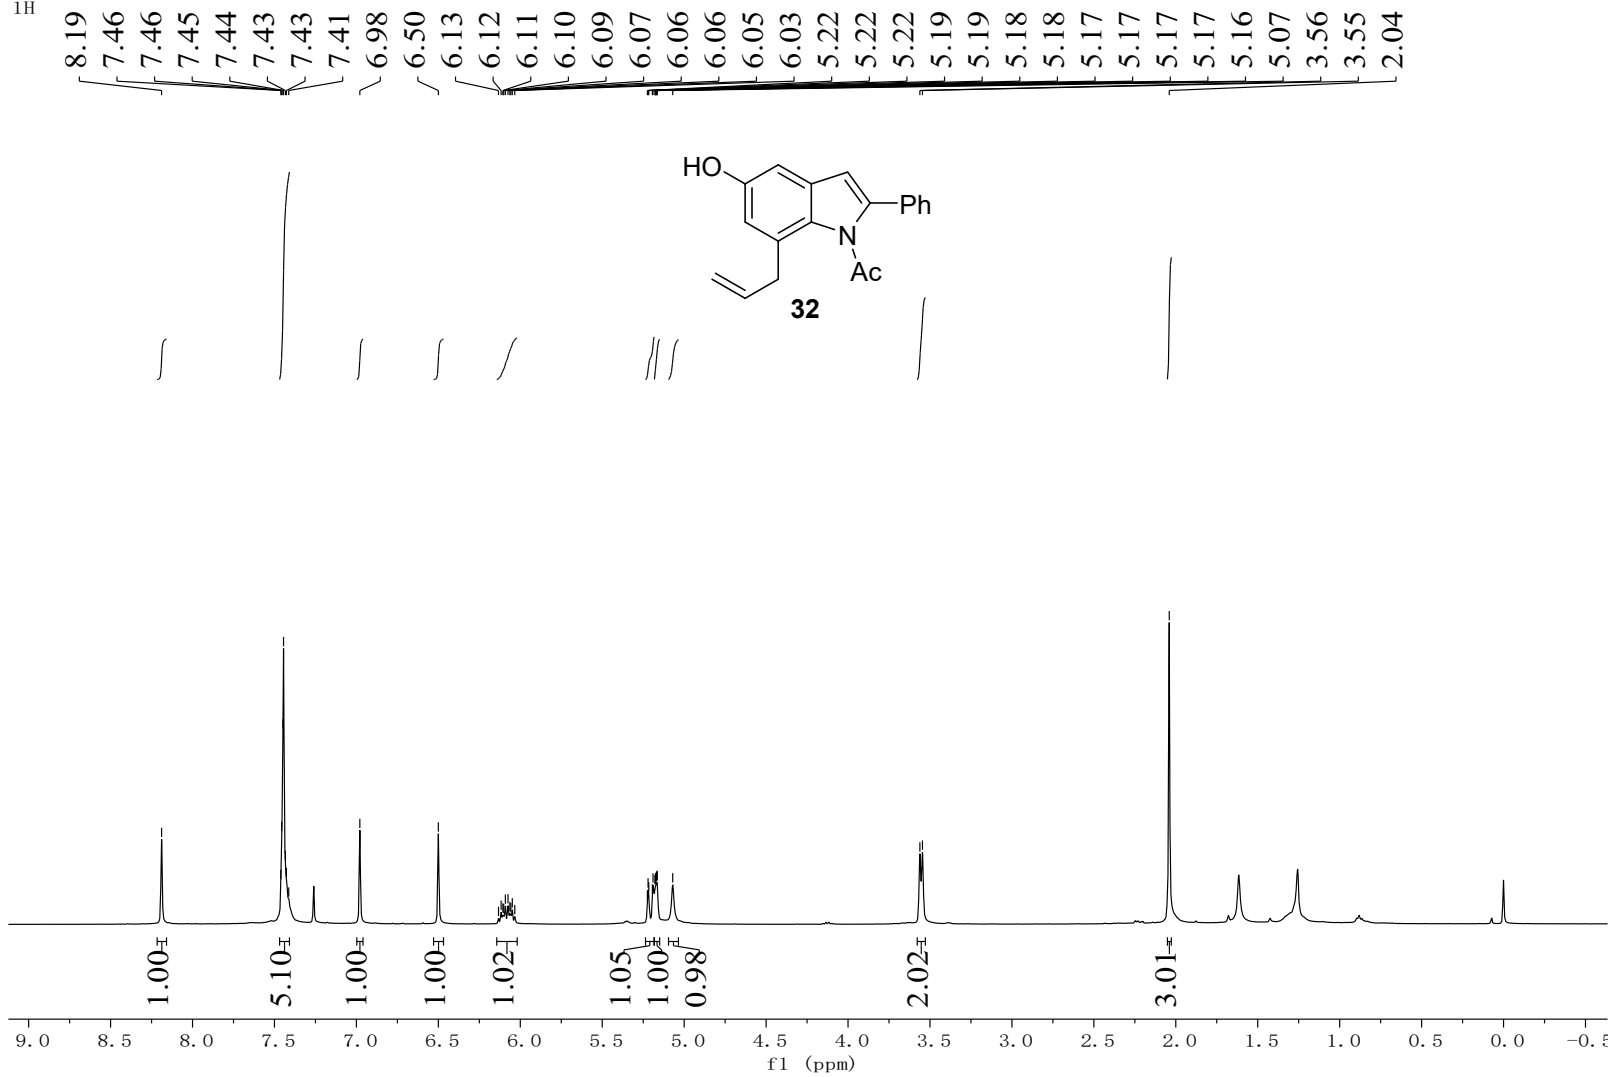



C-EP[I]-C. 1. 1. 1r  
13C

— 171.28

— 151.10

— 140.04

— 136.78

— 134.27

— 132.85

— 129.00

— 128.77

— 128.75

— 128.61

— 123.86

— 117.70

— 116.49

— 111.28

— 106.06

— 36.18

— 27.82

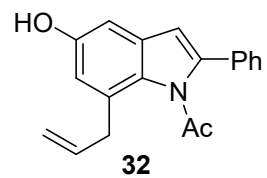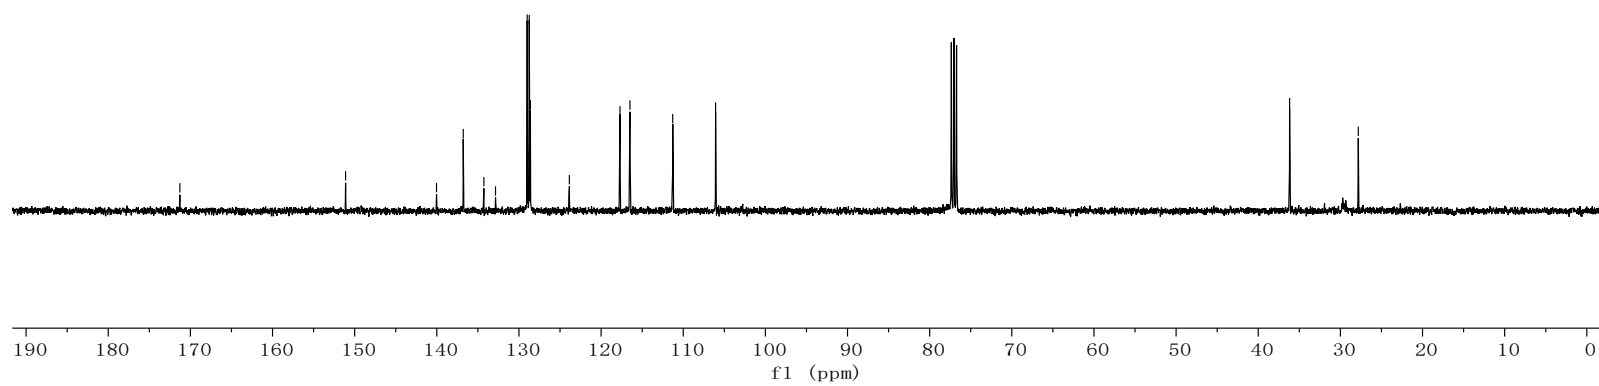

C-2Me[E]. 1. fid

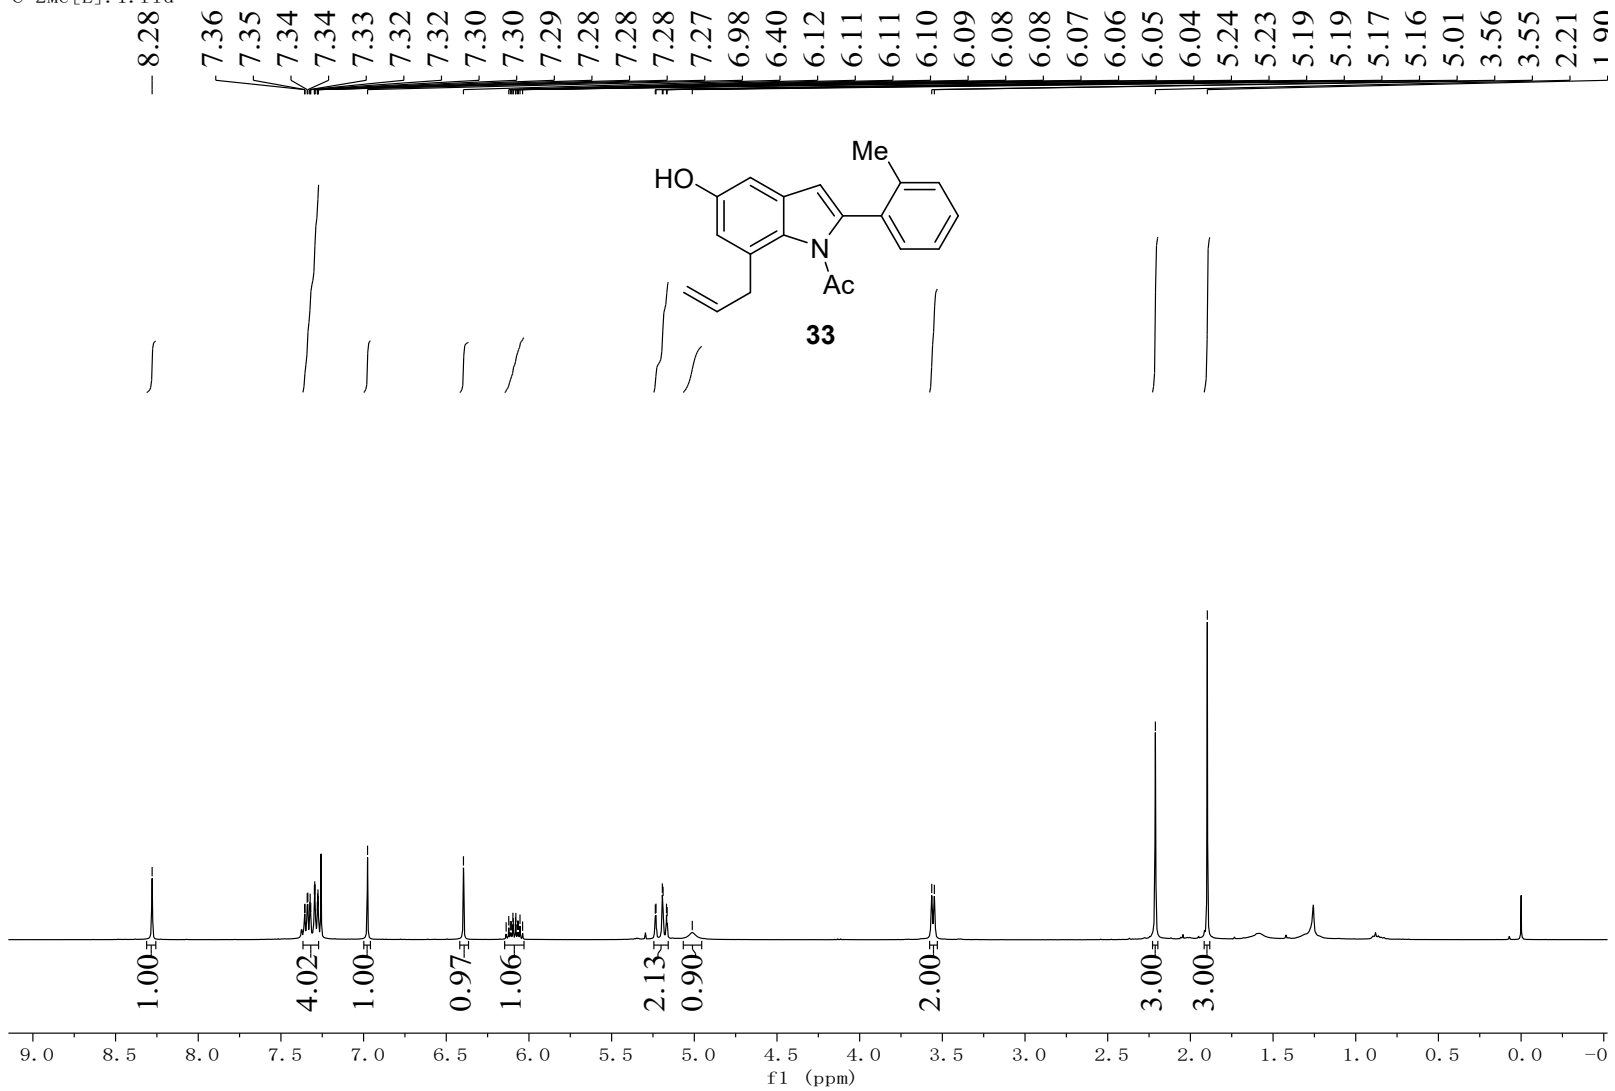

C-2Me[E]-C. 1. fid

— 170.66

— 151.08  
— 138.75  
— 137.50  
— 136.80  
— 134.10  
— 132.25  
— 130.40  
— 130.37  
— 129.24  
— 129.02  
— 126.12  
— 123.56  
— 118.38  
— 116.48  
— 110.96  
— 105.96

— 36.20

— 26.40

— 19.98

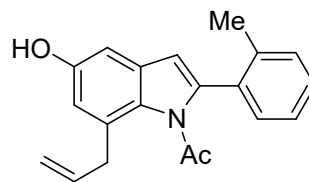

**33**

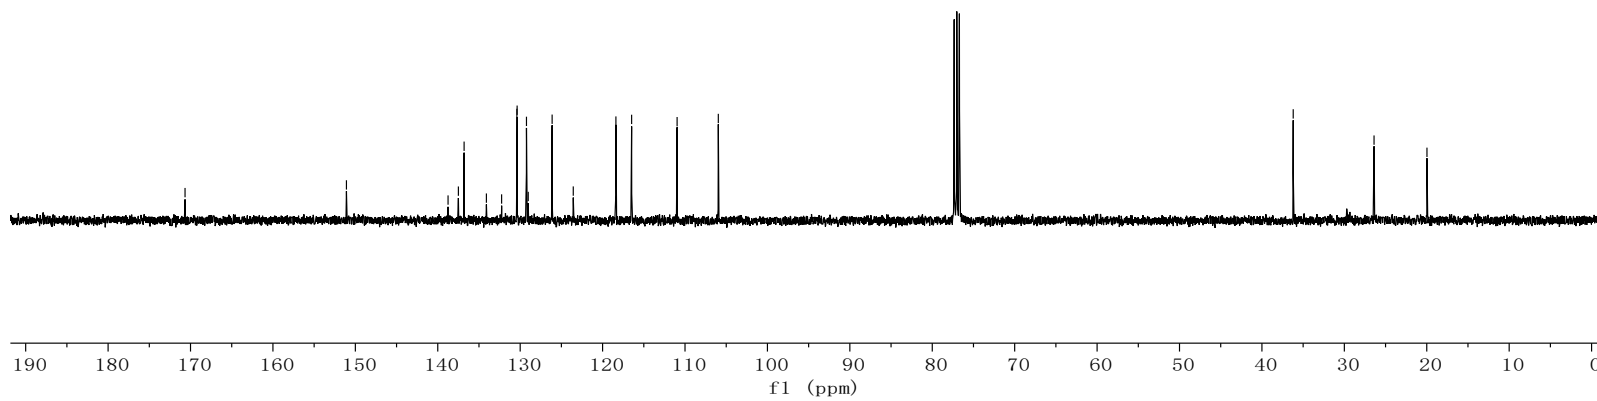

C-3Me[E]. 1. fid

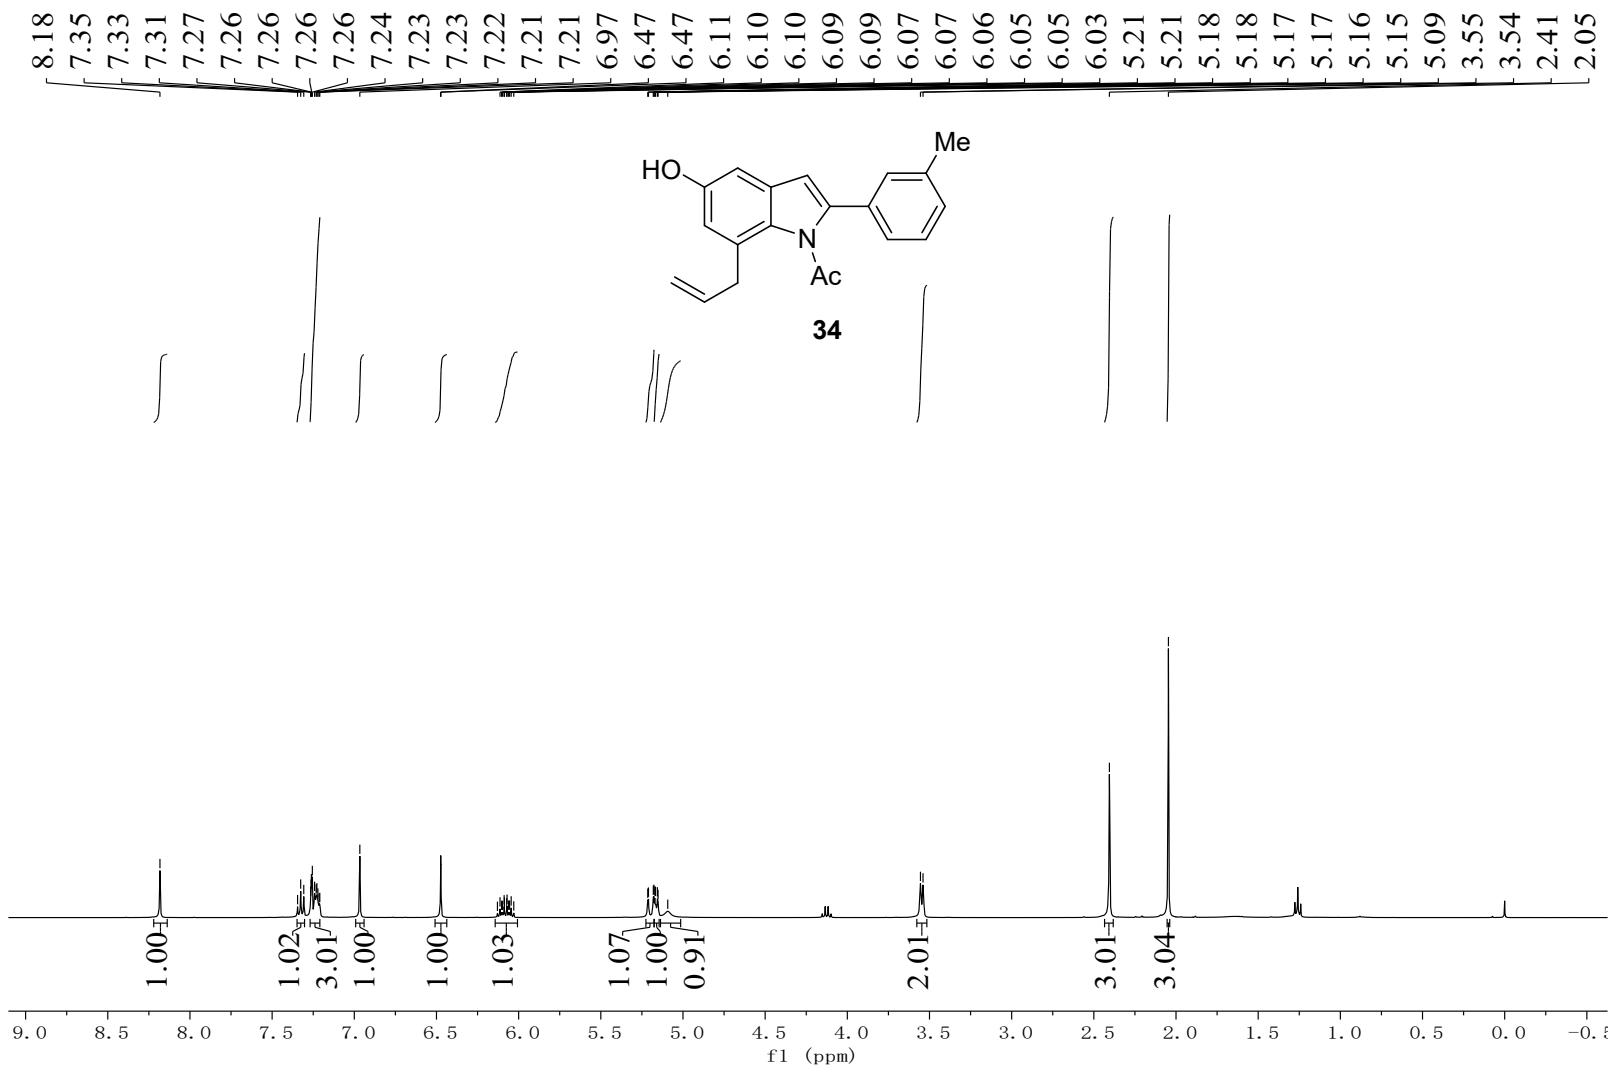

C-3Me[E]-C. 1. fid

— 171.39

— 151.07  
— 140.23  
— 138.51  
— 136.80  
— 134.17  
— 132.82  
— 129.56  
— 129.34  
— 128.78  
— 128.60  
— 126.12  
— 123.80  
— 117.65  
— 116.41  
— 111.08  
— 106.01

— 36.14  
— 27.79  
— 21.41

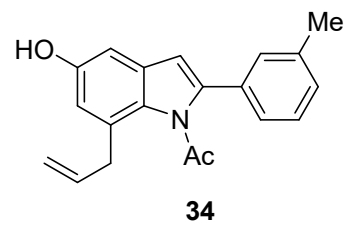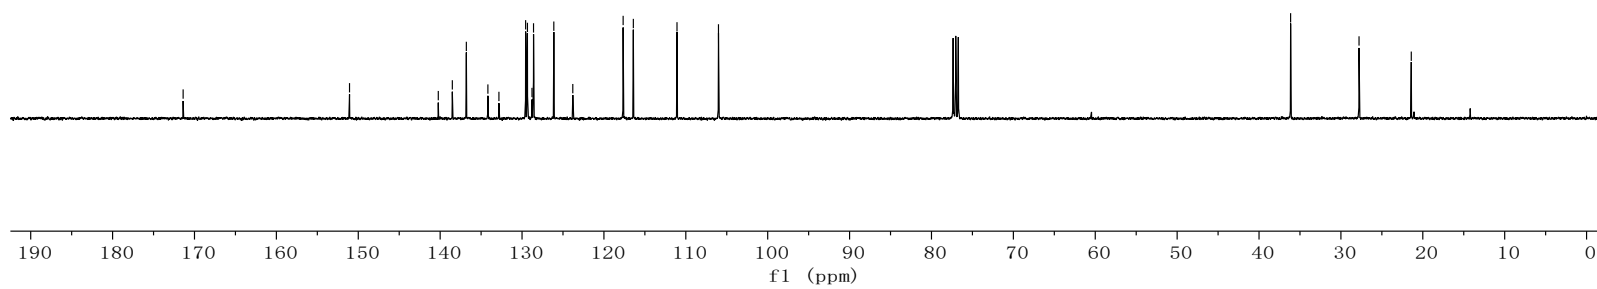

C-4Me[E]. 1. fid

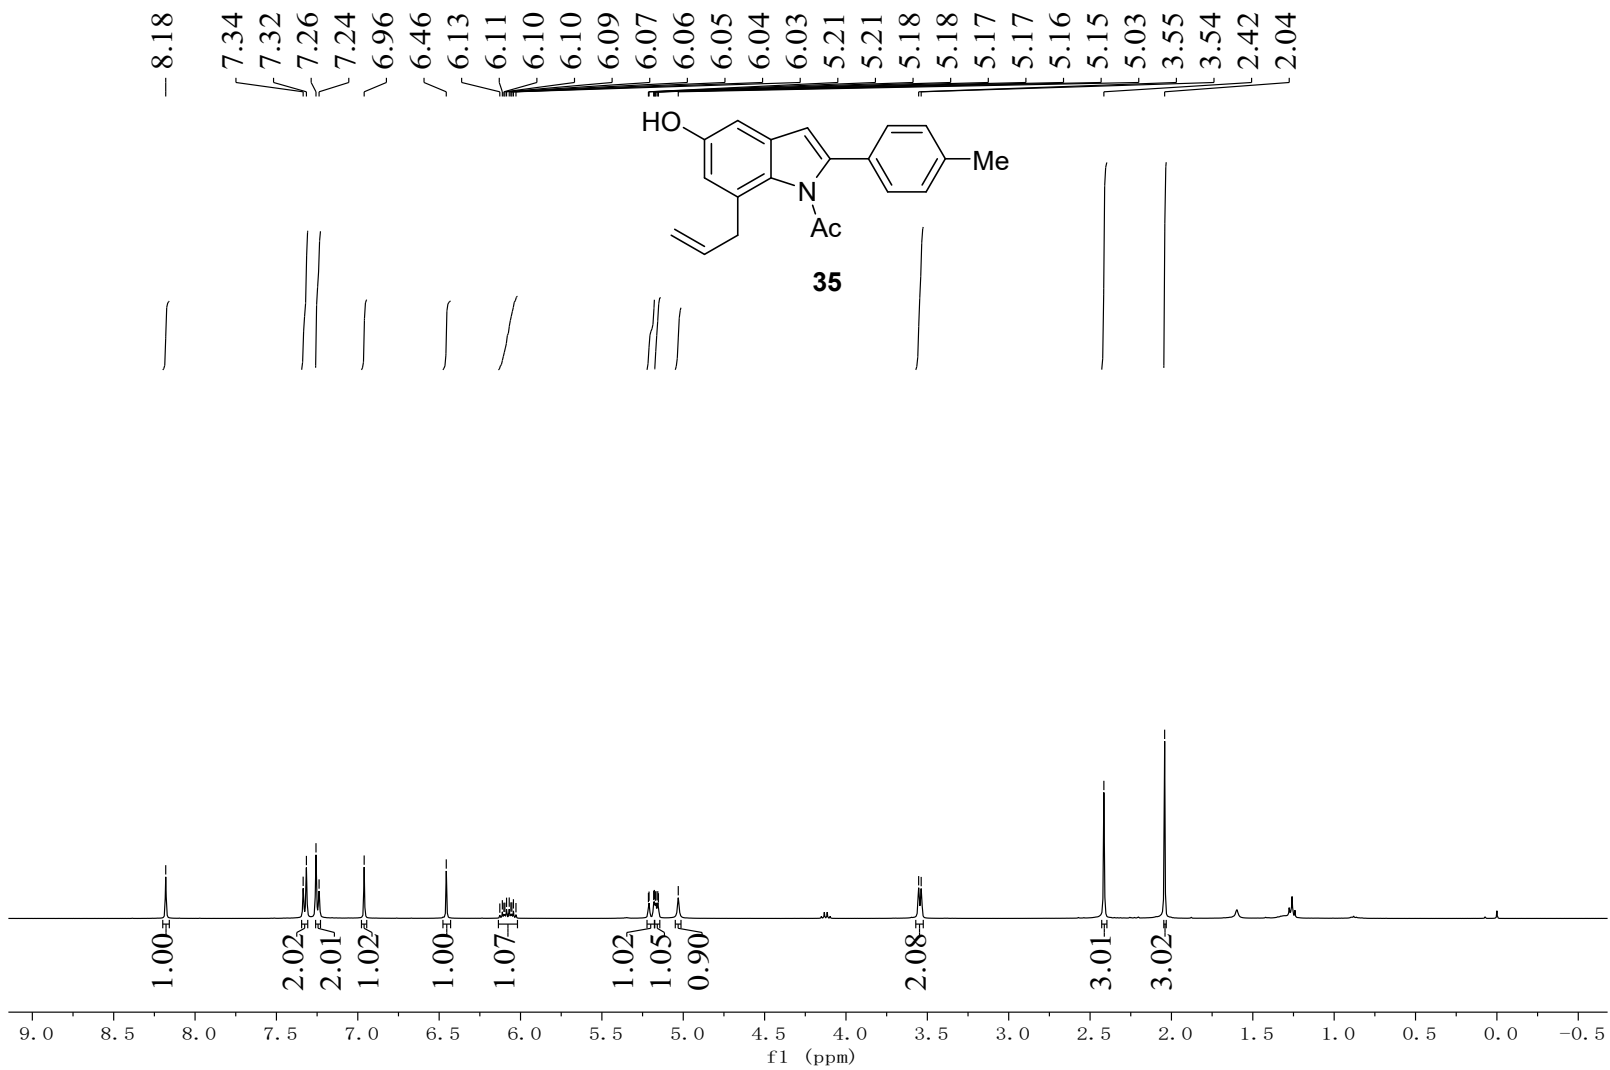

C-4Me[E]-C. 1. fid

171.35

151.05  
140.17  
138.63  
136.81  
132.79  
131.33  
129.41  
128.88  
128.83  
123.65  
117.68  
116.41  
110.90  
105.97

36.16  
27.78  
21.33

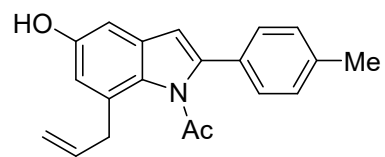

35

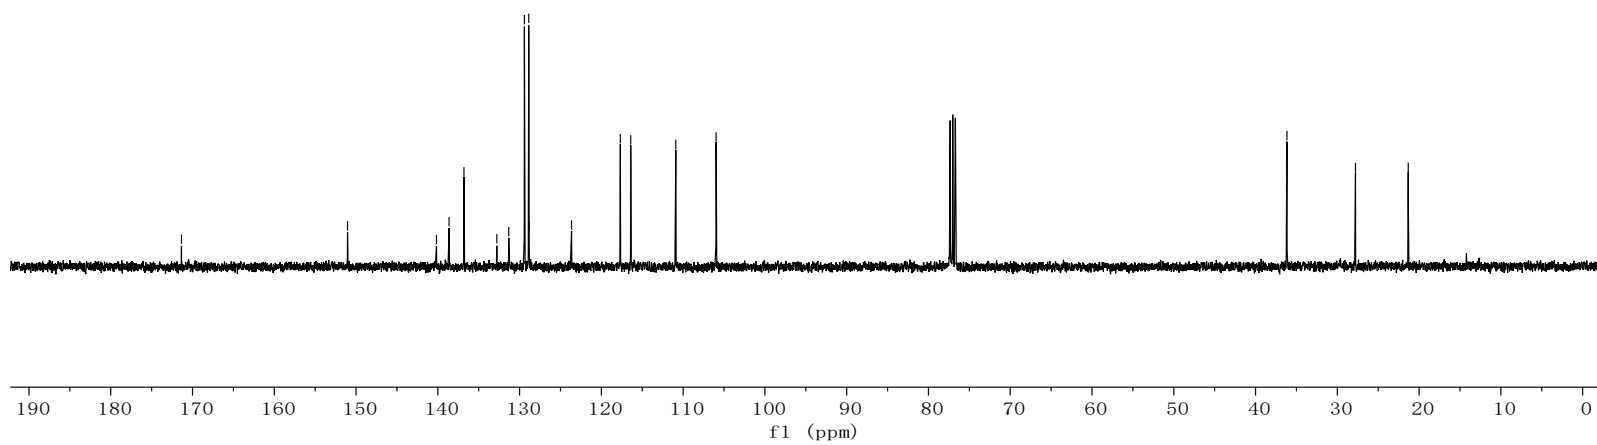

C-2Cl[E]. 1. fid

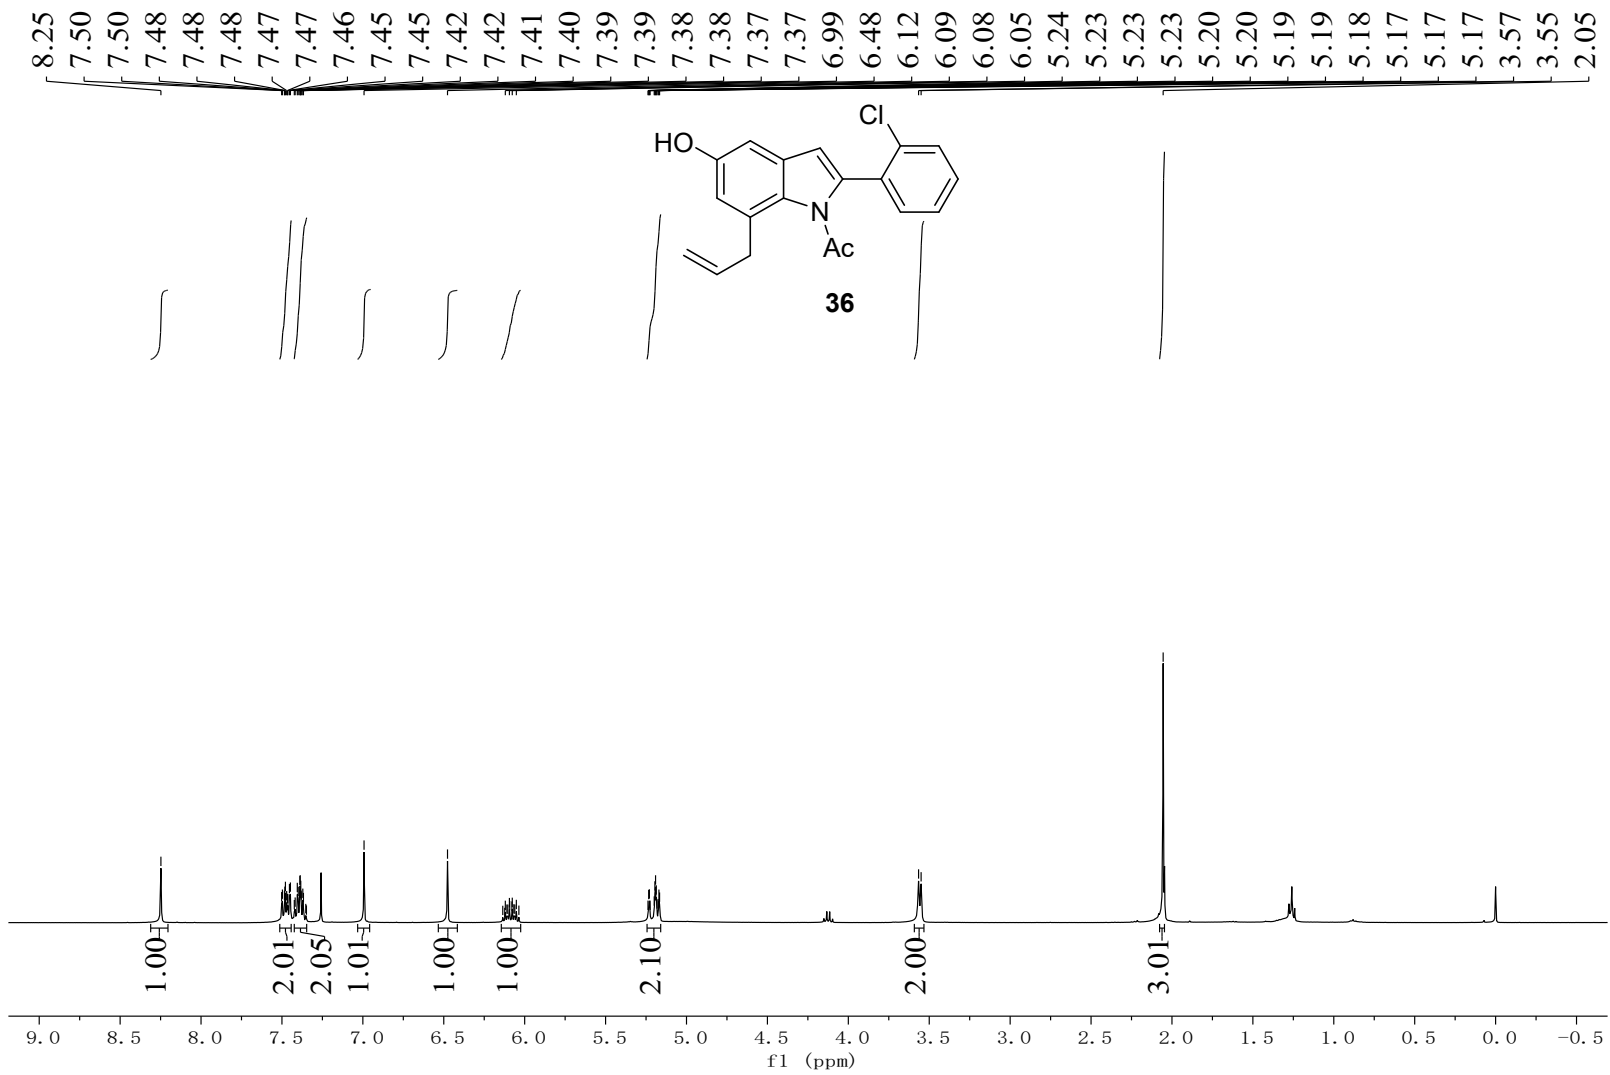



C-2Cl[E]-C. 1. fid

— 170.18

— 151.07  
— 136.71  
— 136.28  
— 134.66  
— 133.78  
— 132.28  
— 131.74  
— 130.40  
— 129.85  
— 128.71  
— 127.12  
— 124.16  
— 118.24  
— 116.55  
— 112.06  
— 106.18

— 36.21

— 26.11

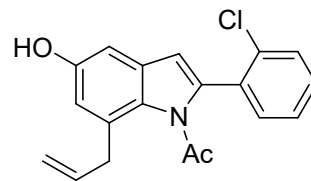

**36**

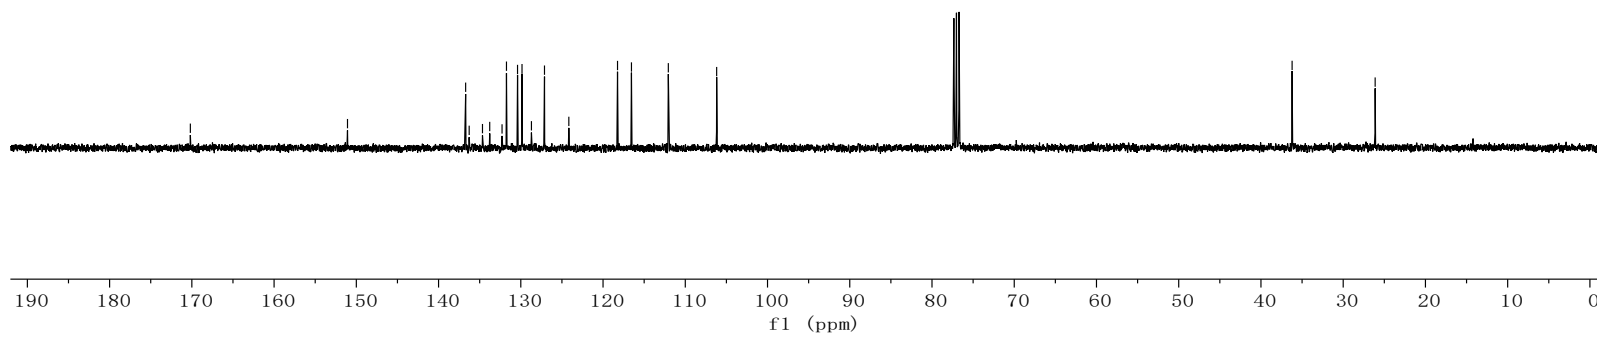

C-3Cl[E]. 1. fid

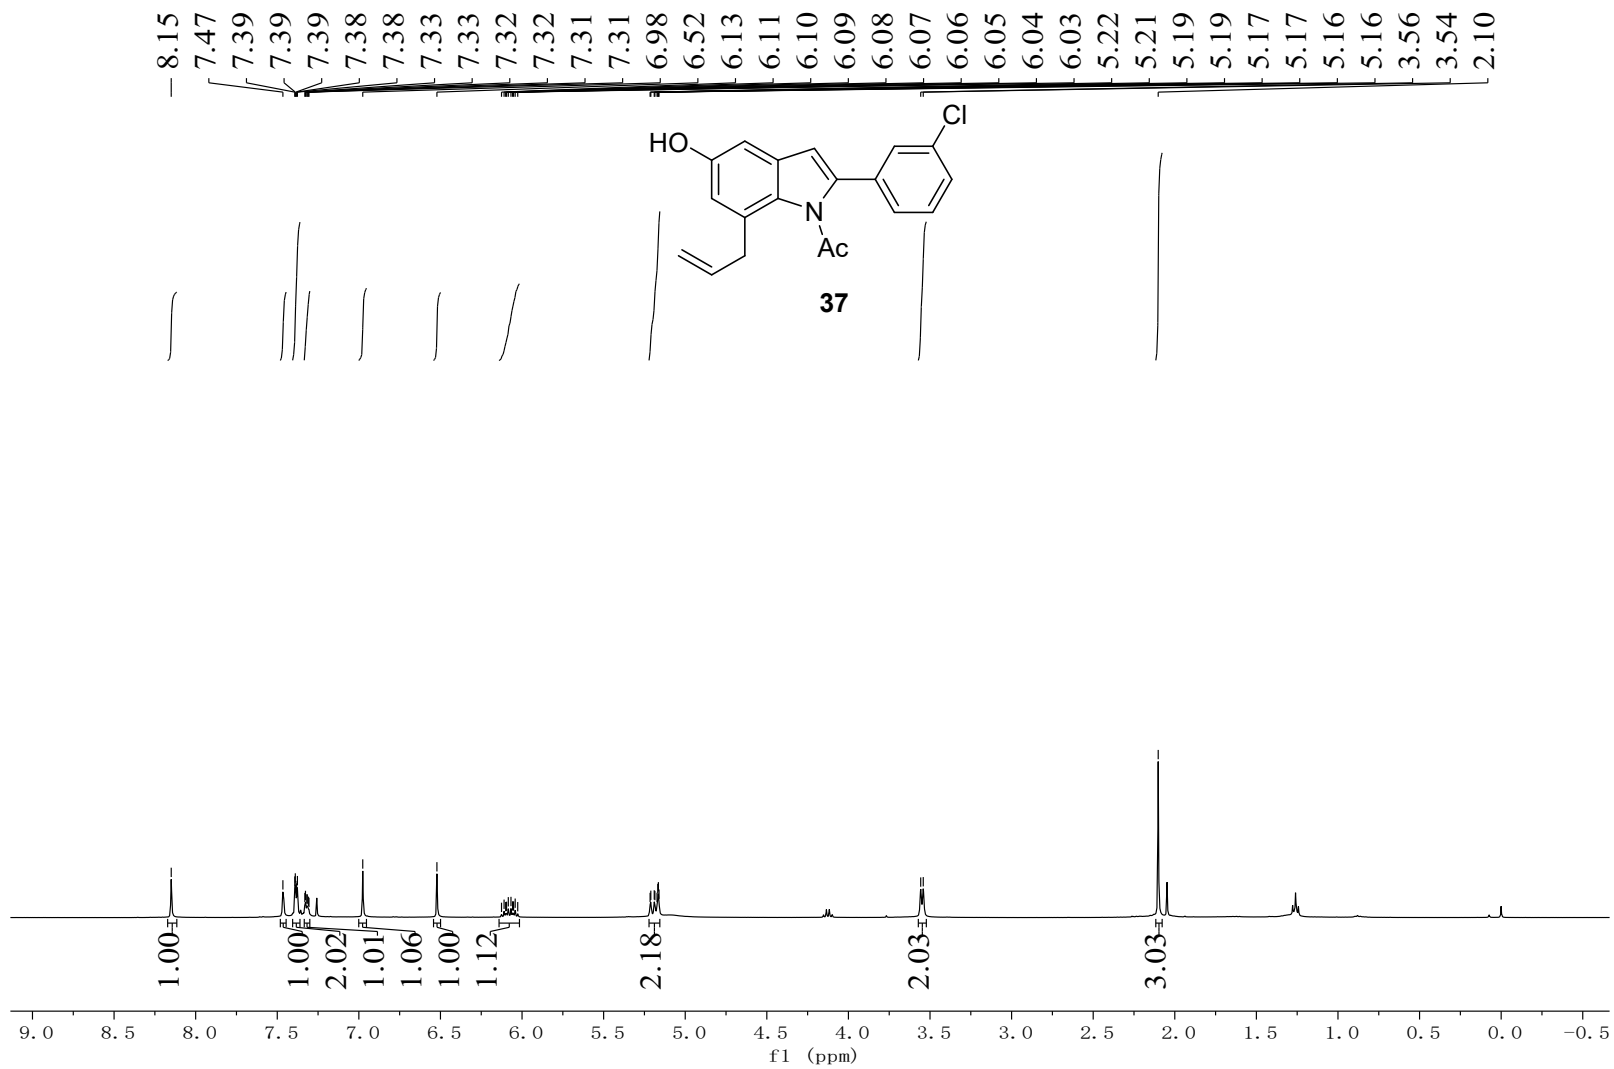

C-3Cl[E]-C. 1. fid

- 170.80

- 151.17  
- 138.36  
- 136.64  
- 136.00  
- 134.73  
- 132.92  
- 129.93  
- 128.77  
- 128.63  
- 128.54  
- 127.10  
- 124.42  
- 117.61  
- 116.54  
- 112.03  
- 106.19

- 36.13

- 27.89

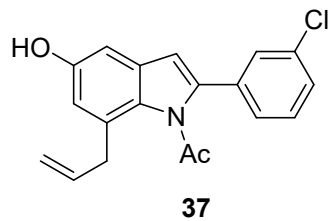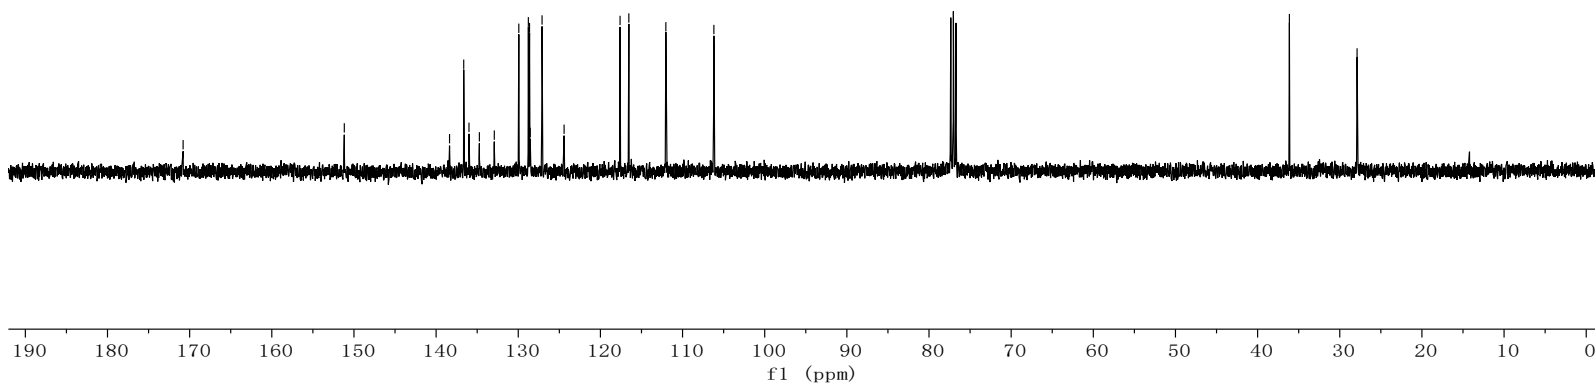

C-4Cl[E]. 1. fid

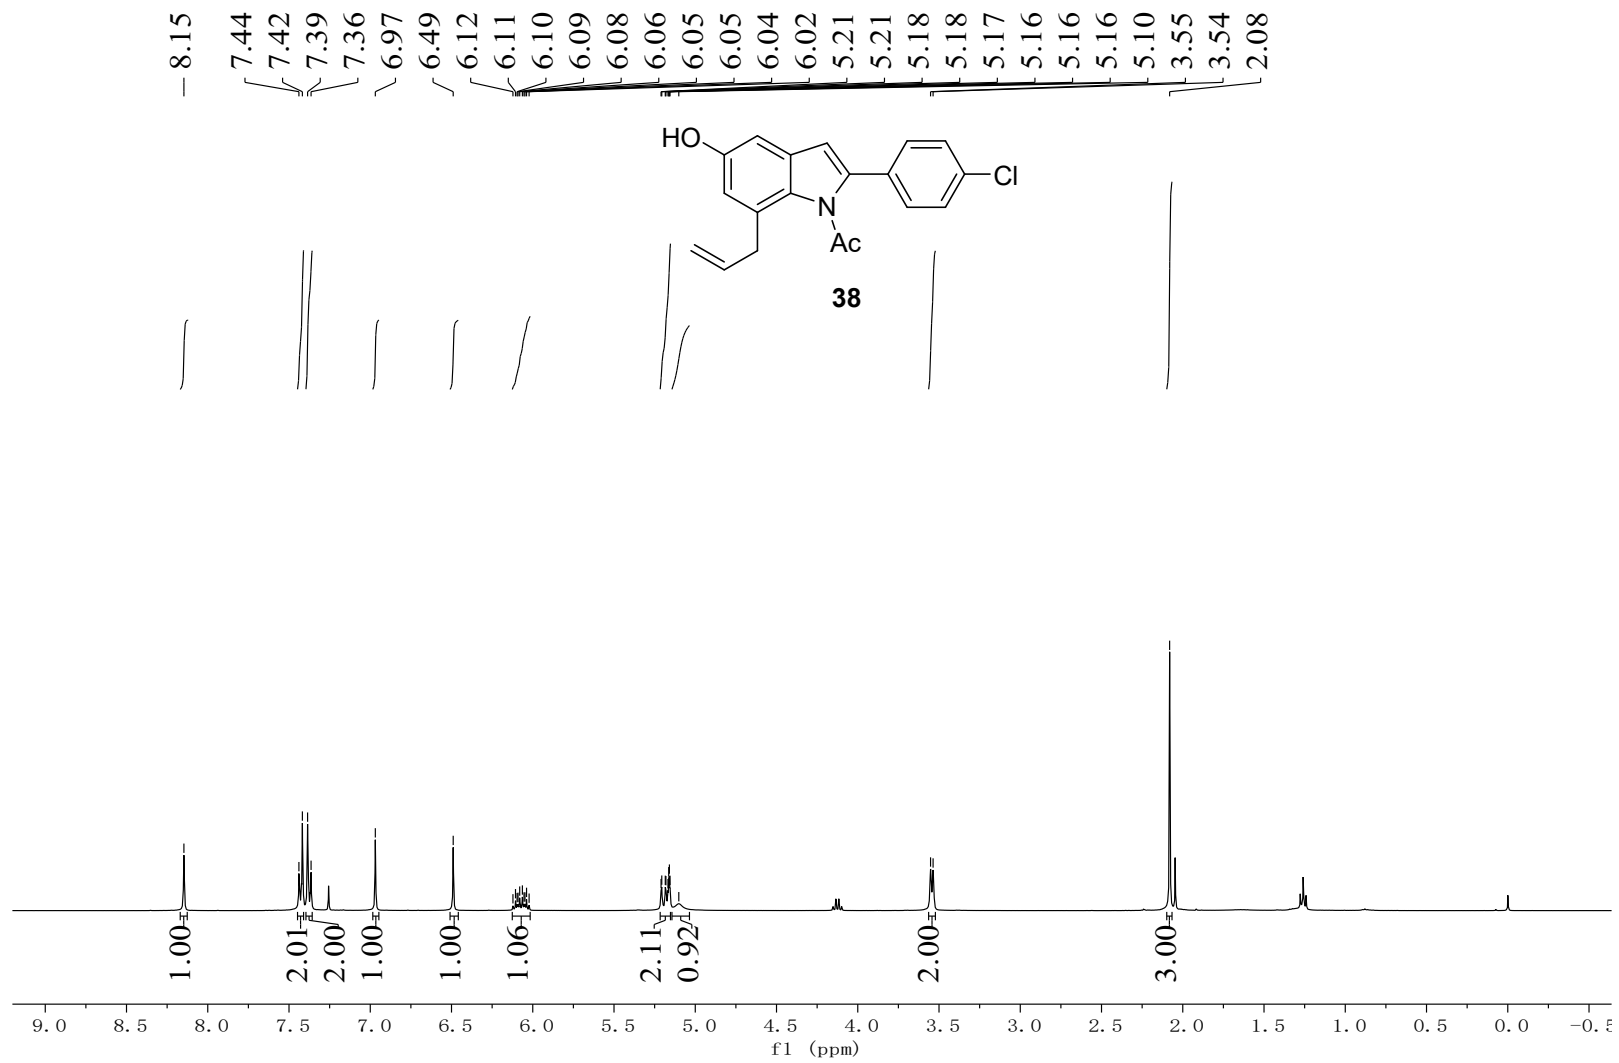

C-4Cl[E]-C. 1. fid

- 170.86

- 151.17  
- 138.67  
- 136.66  
- 134.71  
- 132.88  
- 132.73  
- 130.11  
- 129.01  
- 128.62  
- 124.25  
- 117.61  
- 116.51  
- 111.74  
- 106.12

- 36.12

- 27.89

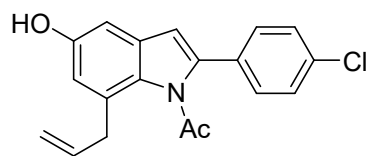

**38**

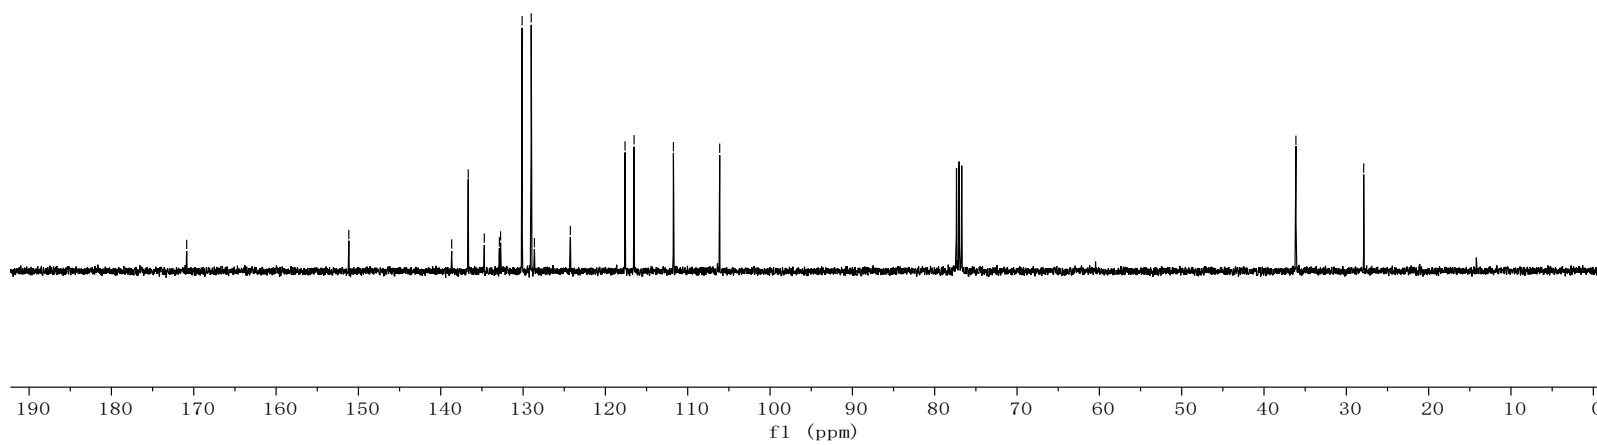

C-F[E]. 1. fid

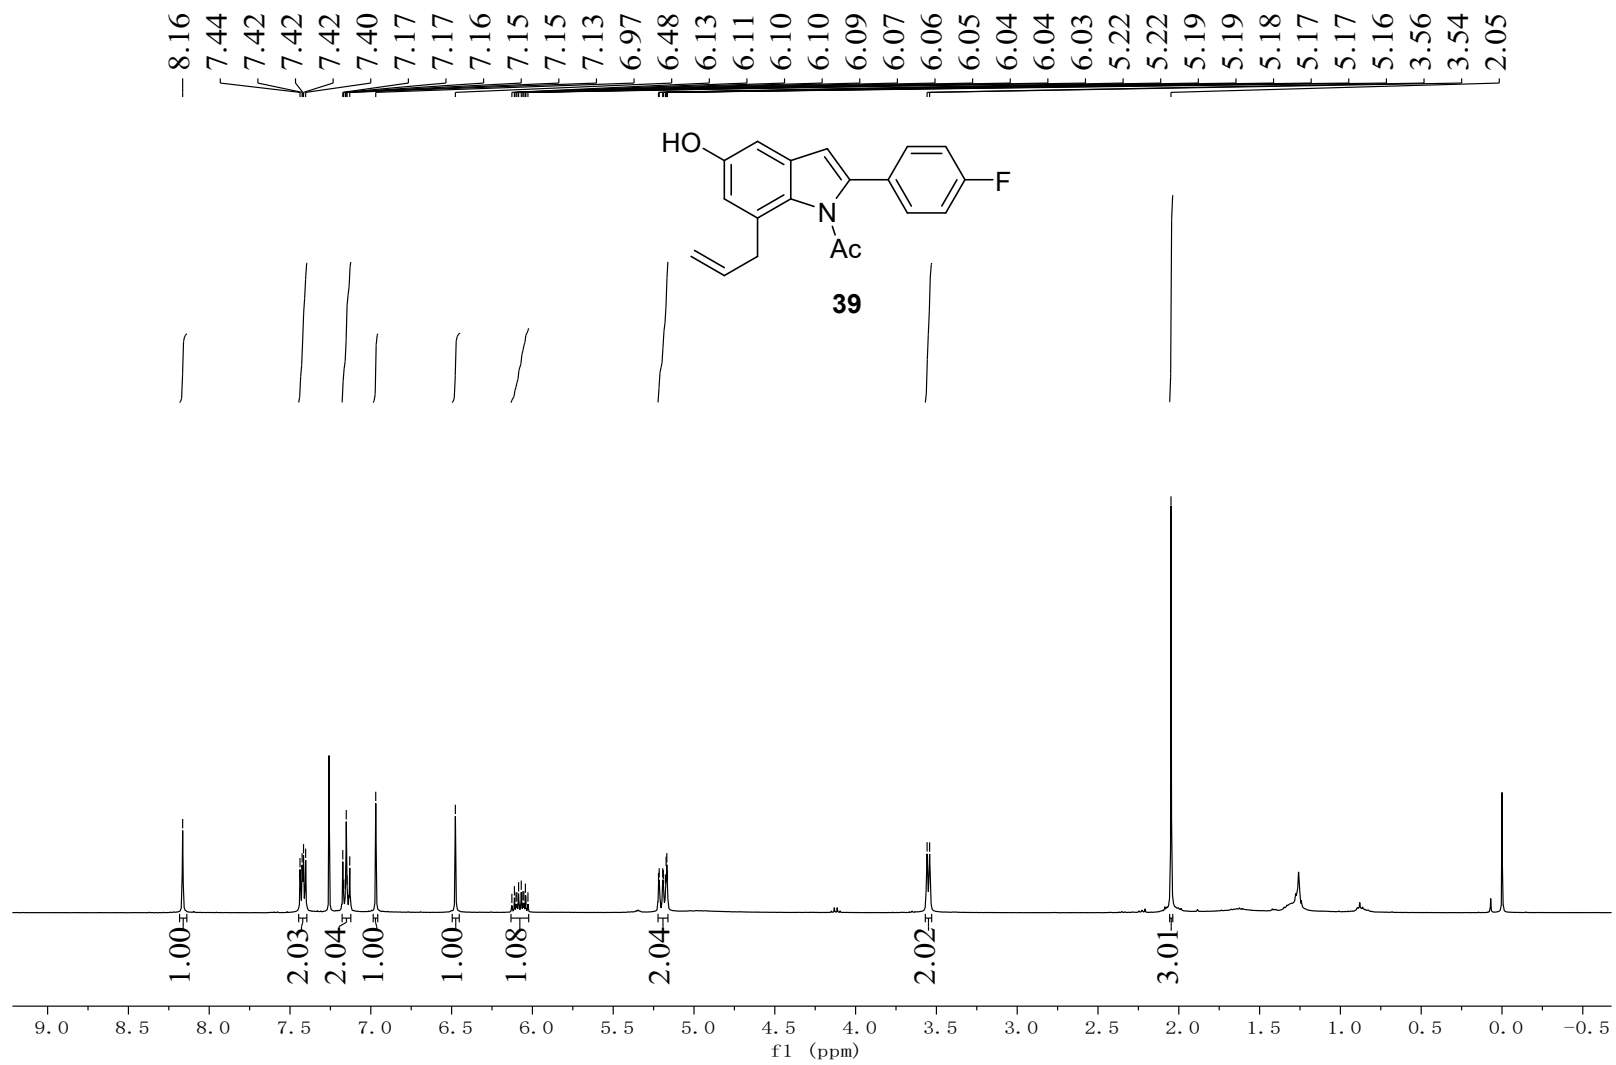

C-F[E]-C. 1. fid

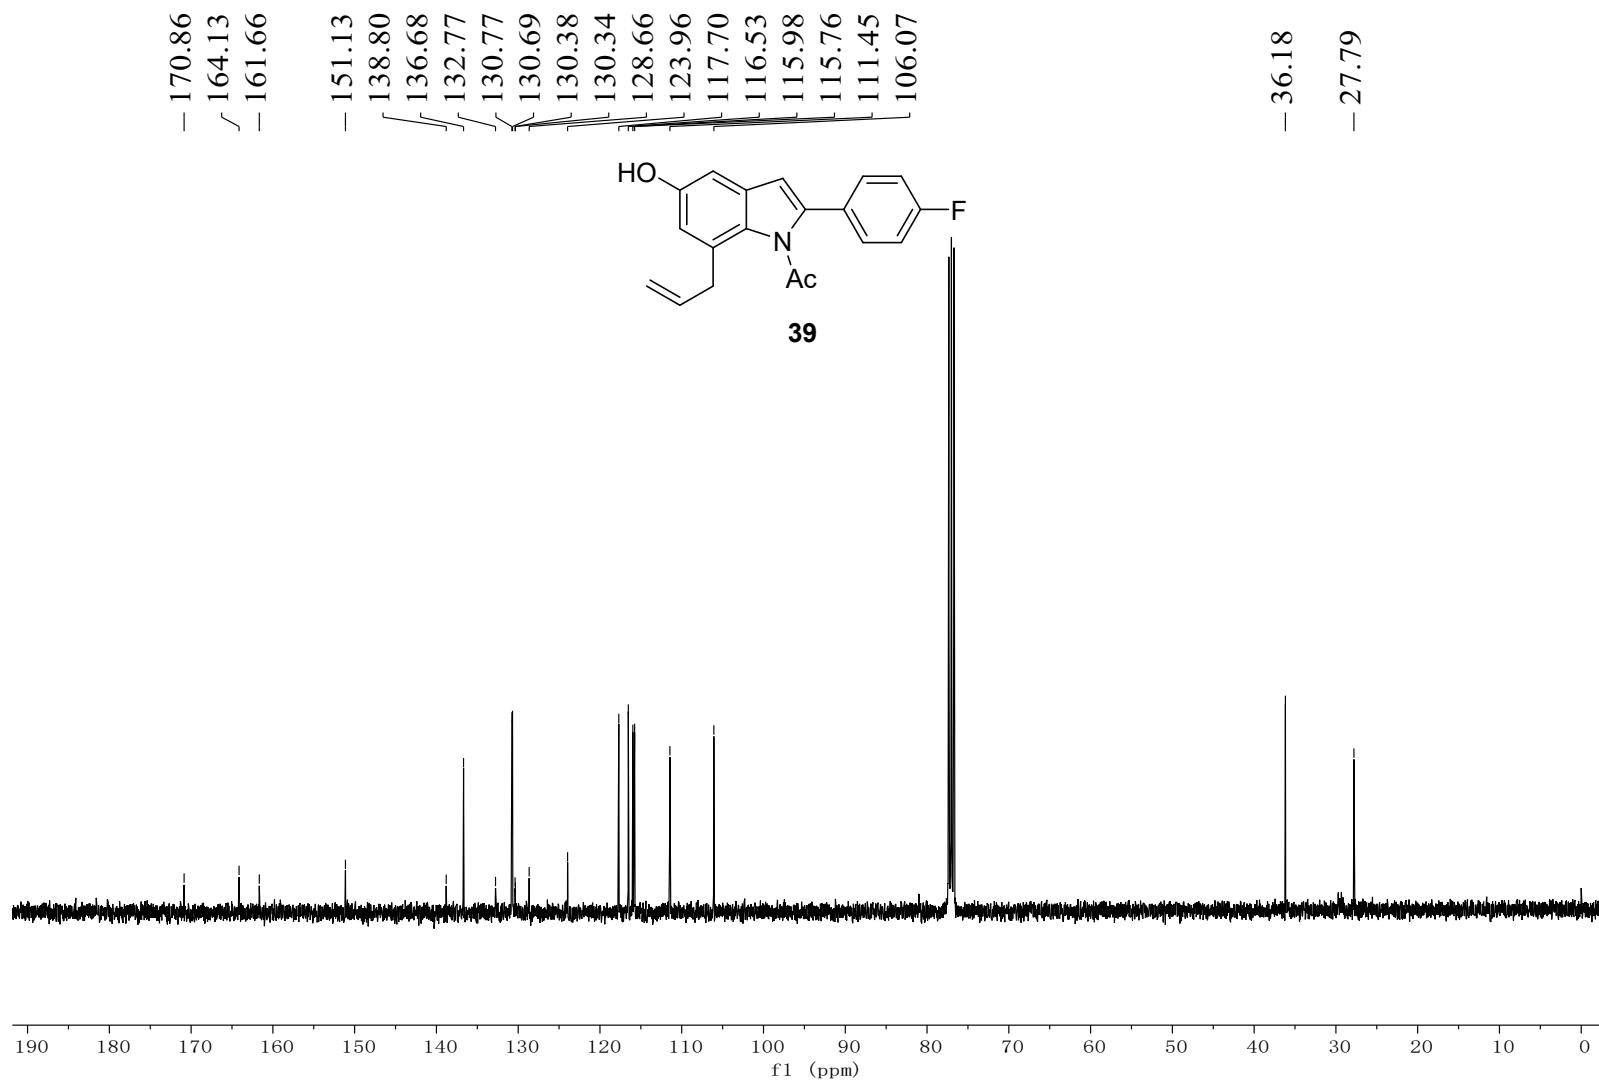

C-Br[E].1.1.fid

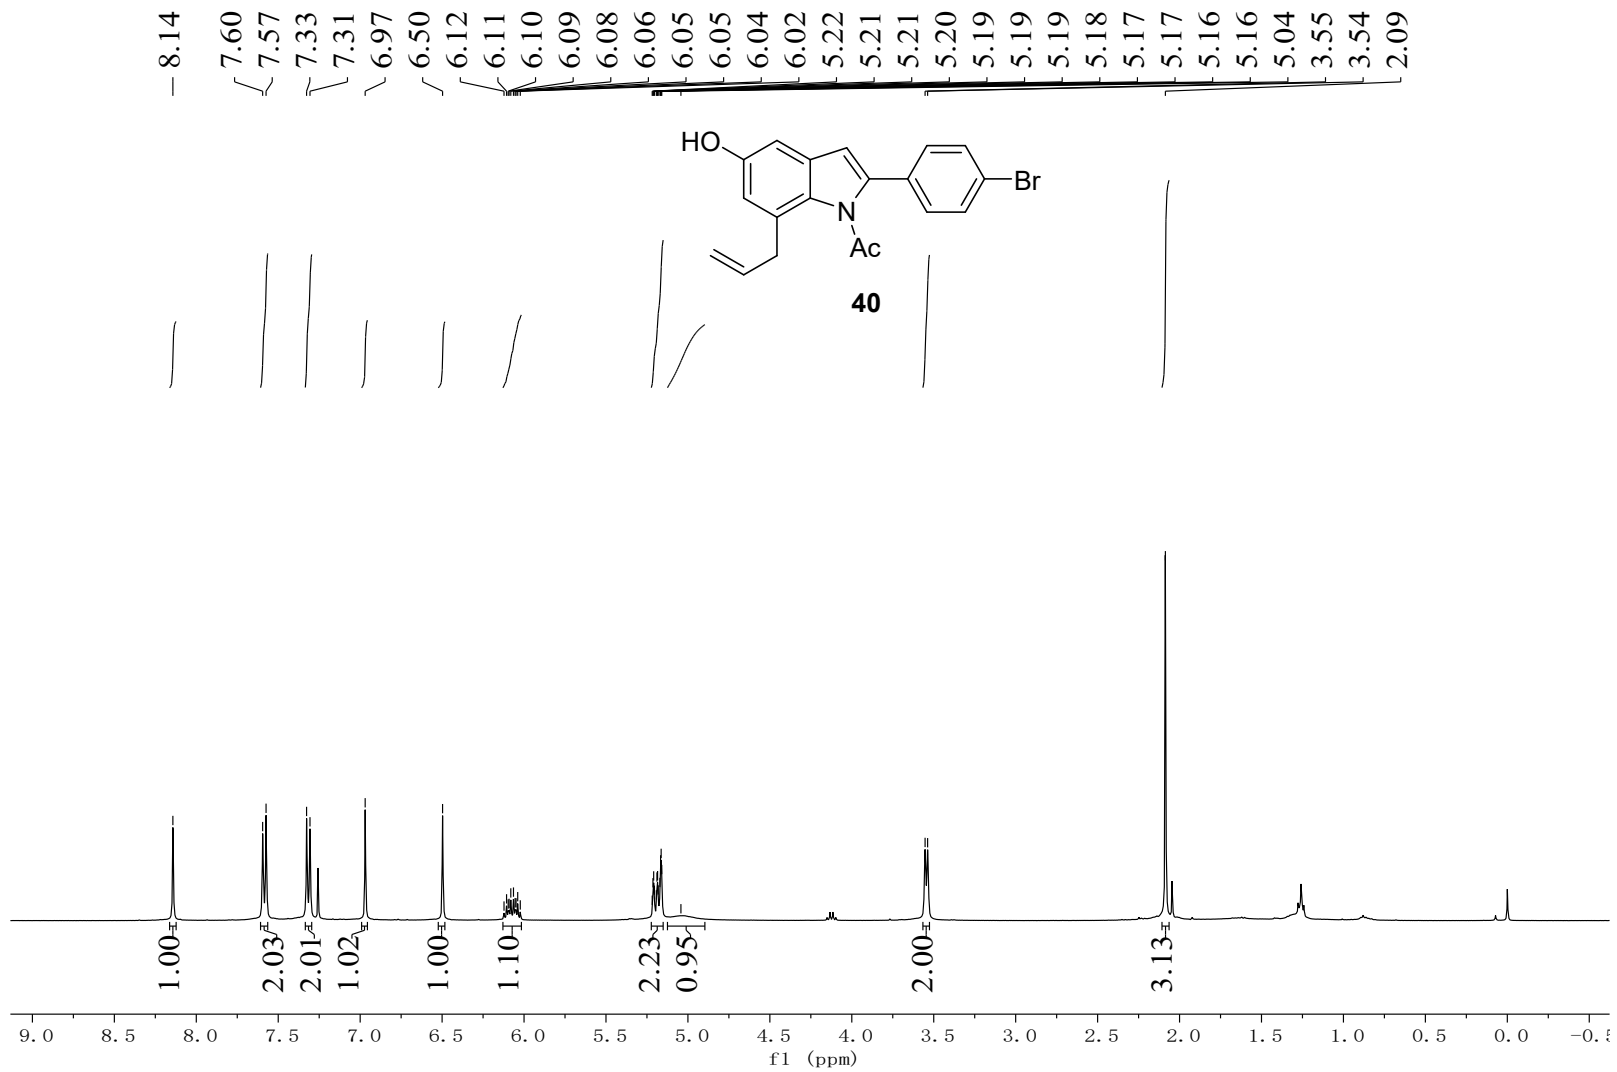



C-Br[E]-C. 1. fid

— 170.82

— 151.16

— 138.70

— 136.64

— 133.20

— 132.90

— 131.96

— 130.37

— 128.63

— 124.24

— 122.84

— 117.61

— 116.54

— 111.73

— 106.13

— 36.15

— 27.92

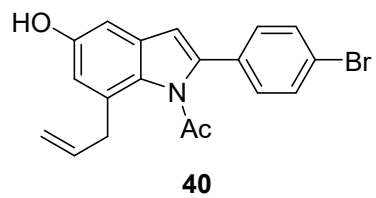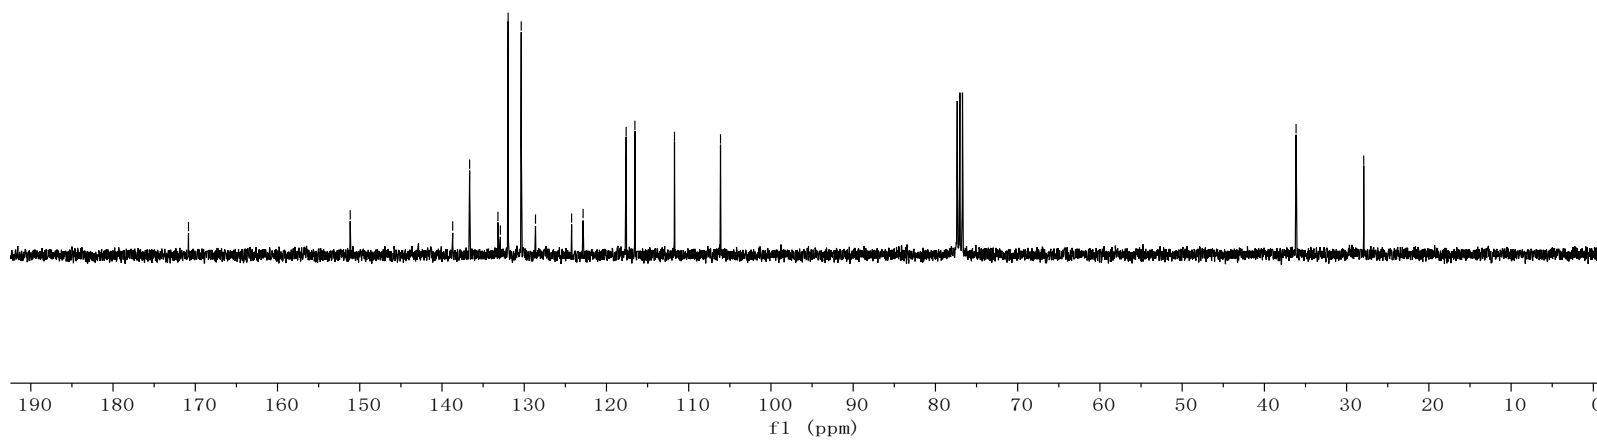

C-W[E]. 1. fid

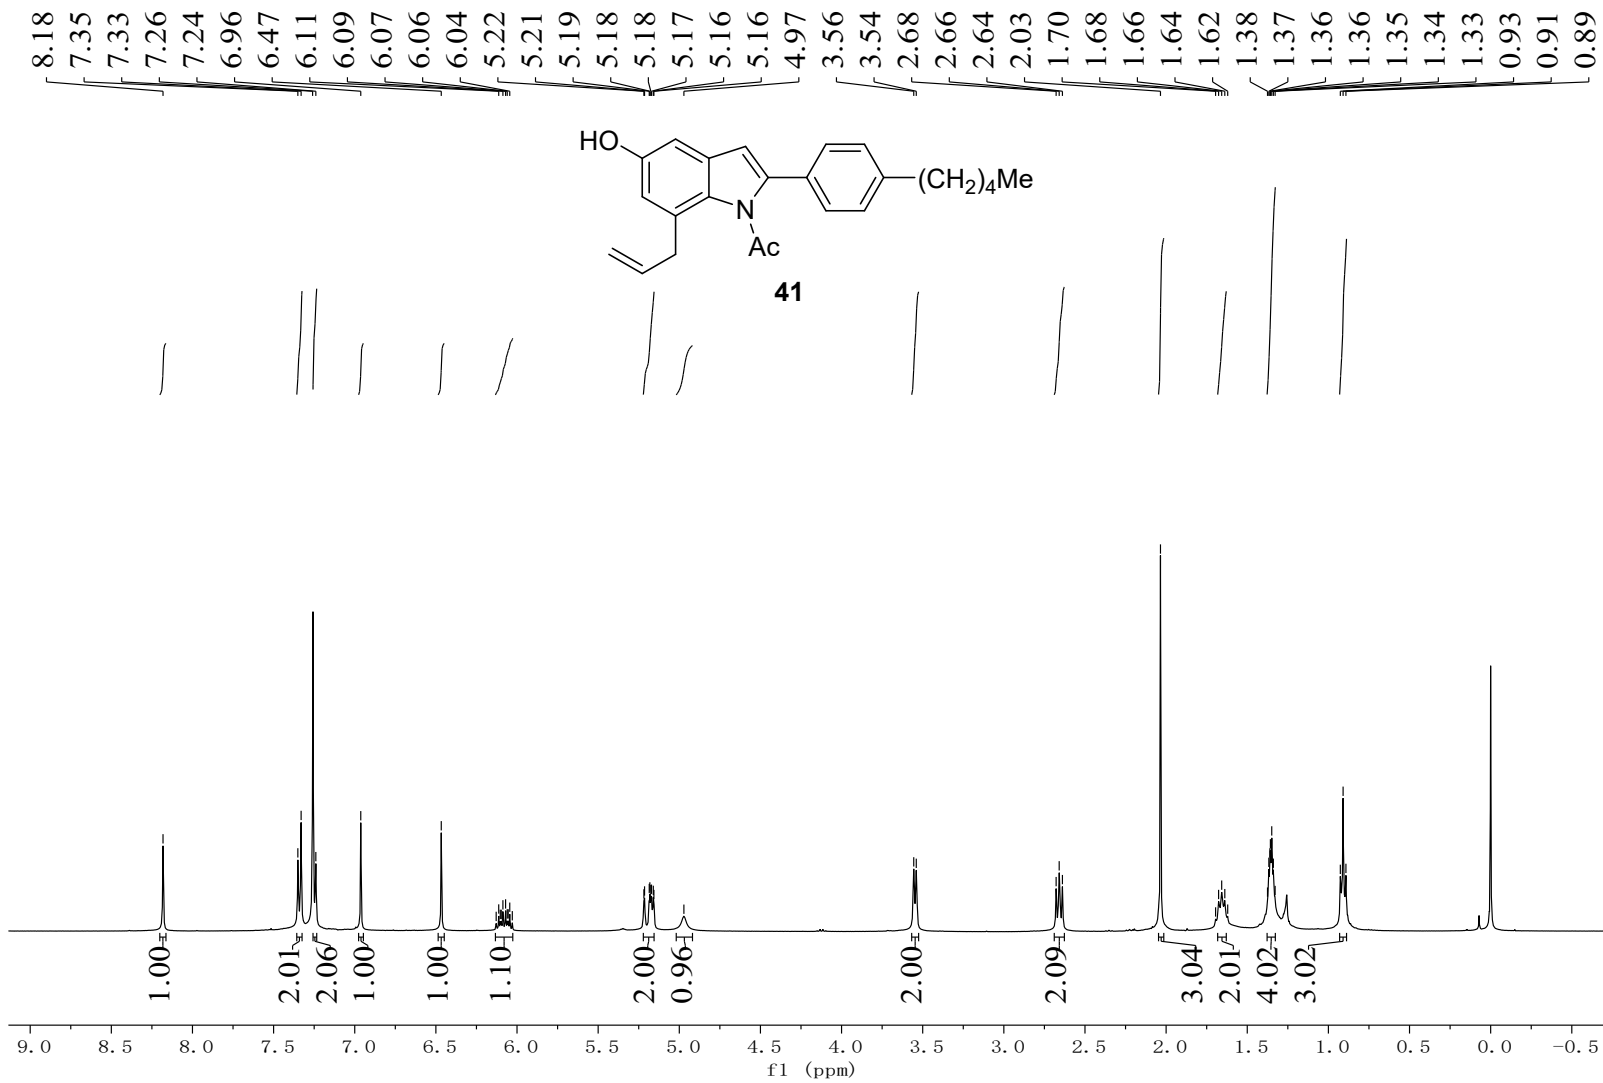

C-W[E]-C. 1. fid

171.37

151.03  
143.70  
140.24  
136.80  
132.80  
131.46  
128.88  
128.85  
128.73  
123.59  
117.67  
116.43  
110.85  
105.98

36.18  
35.72  
31.51  
31.03  
27.74  
22.53  
14.03

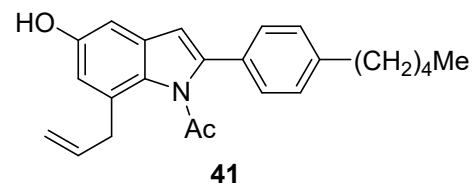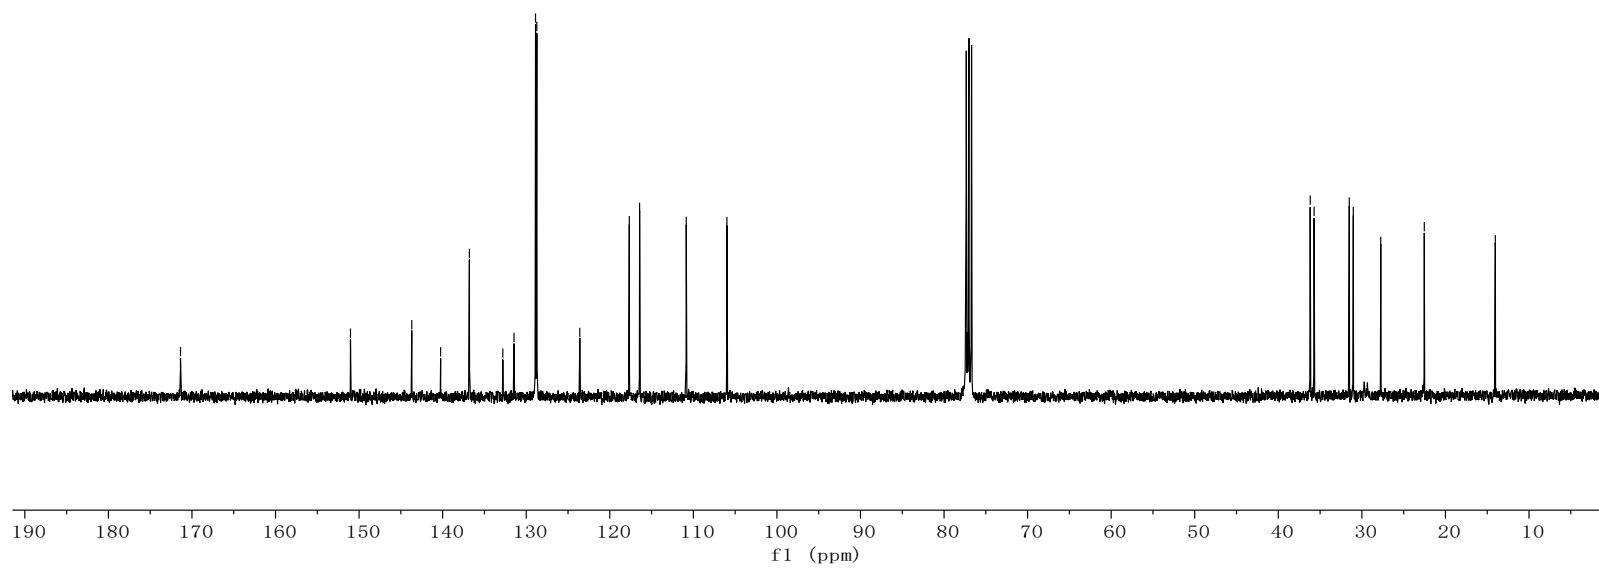

C-OMe[E]. 1. fid

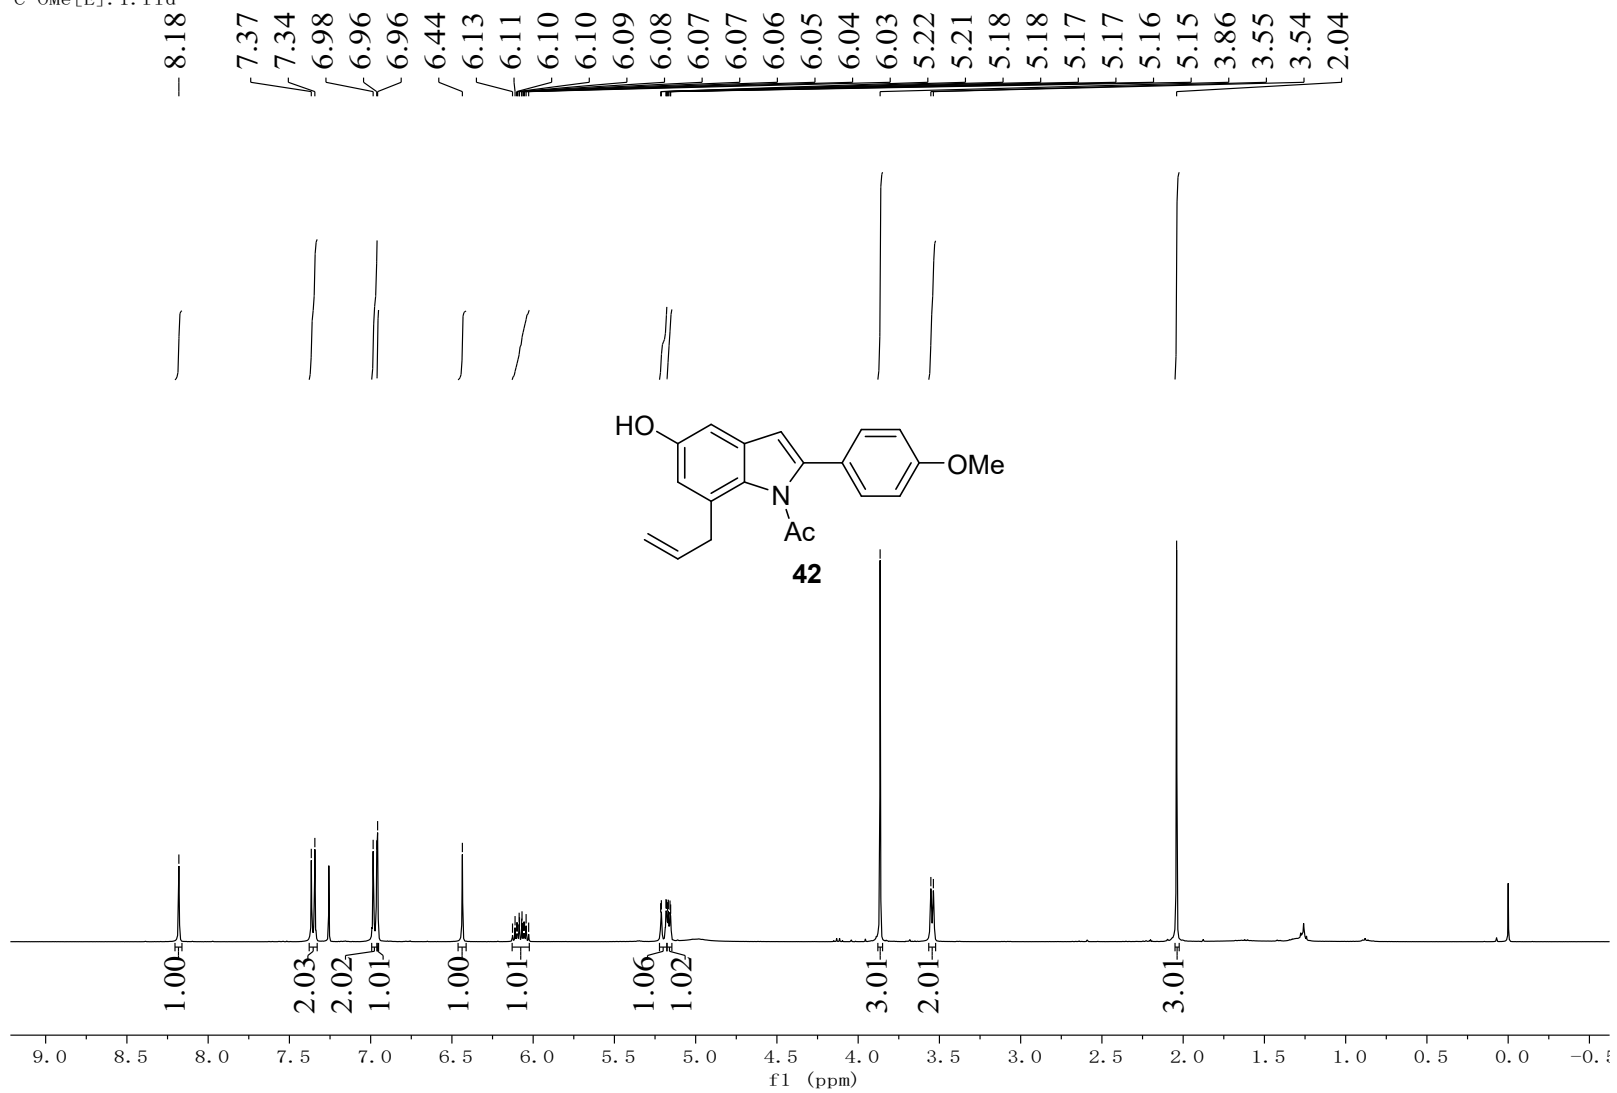

C-OMe[E]-C. 1. fid

— 171.32

— 159.95

— 151.04

— 139.88

— 136.81

— 132.70

— 130.29

— 128.85

— 126.54

— 123.51

— 117.71

— 116.42

— 114.17

— 110.67

— 105.91

— 55.39

— 36.17

— 27.72

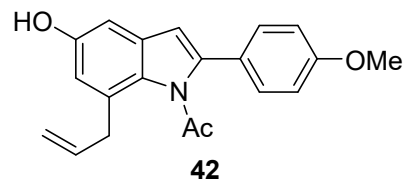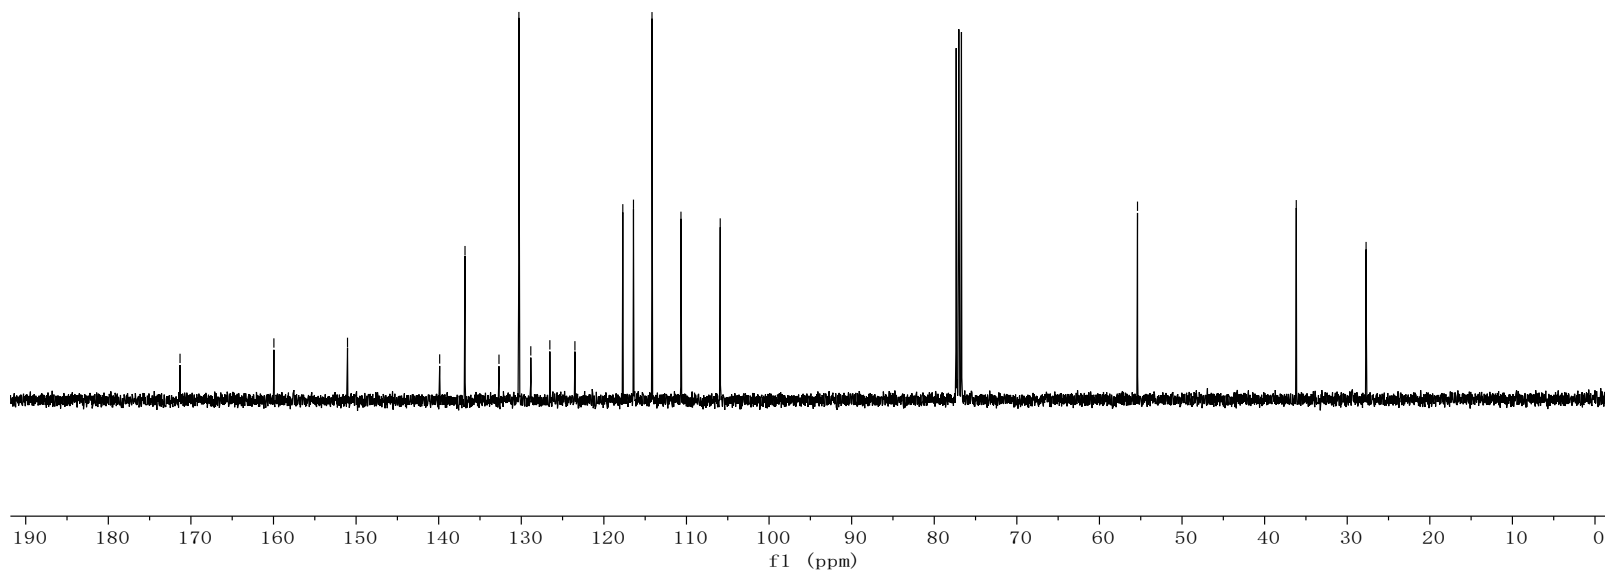

C-nBu[E]. 1. fid

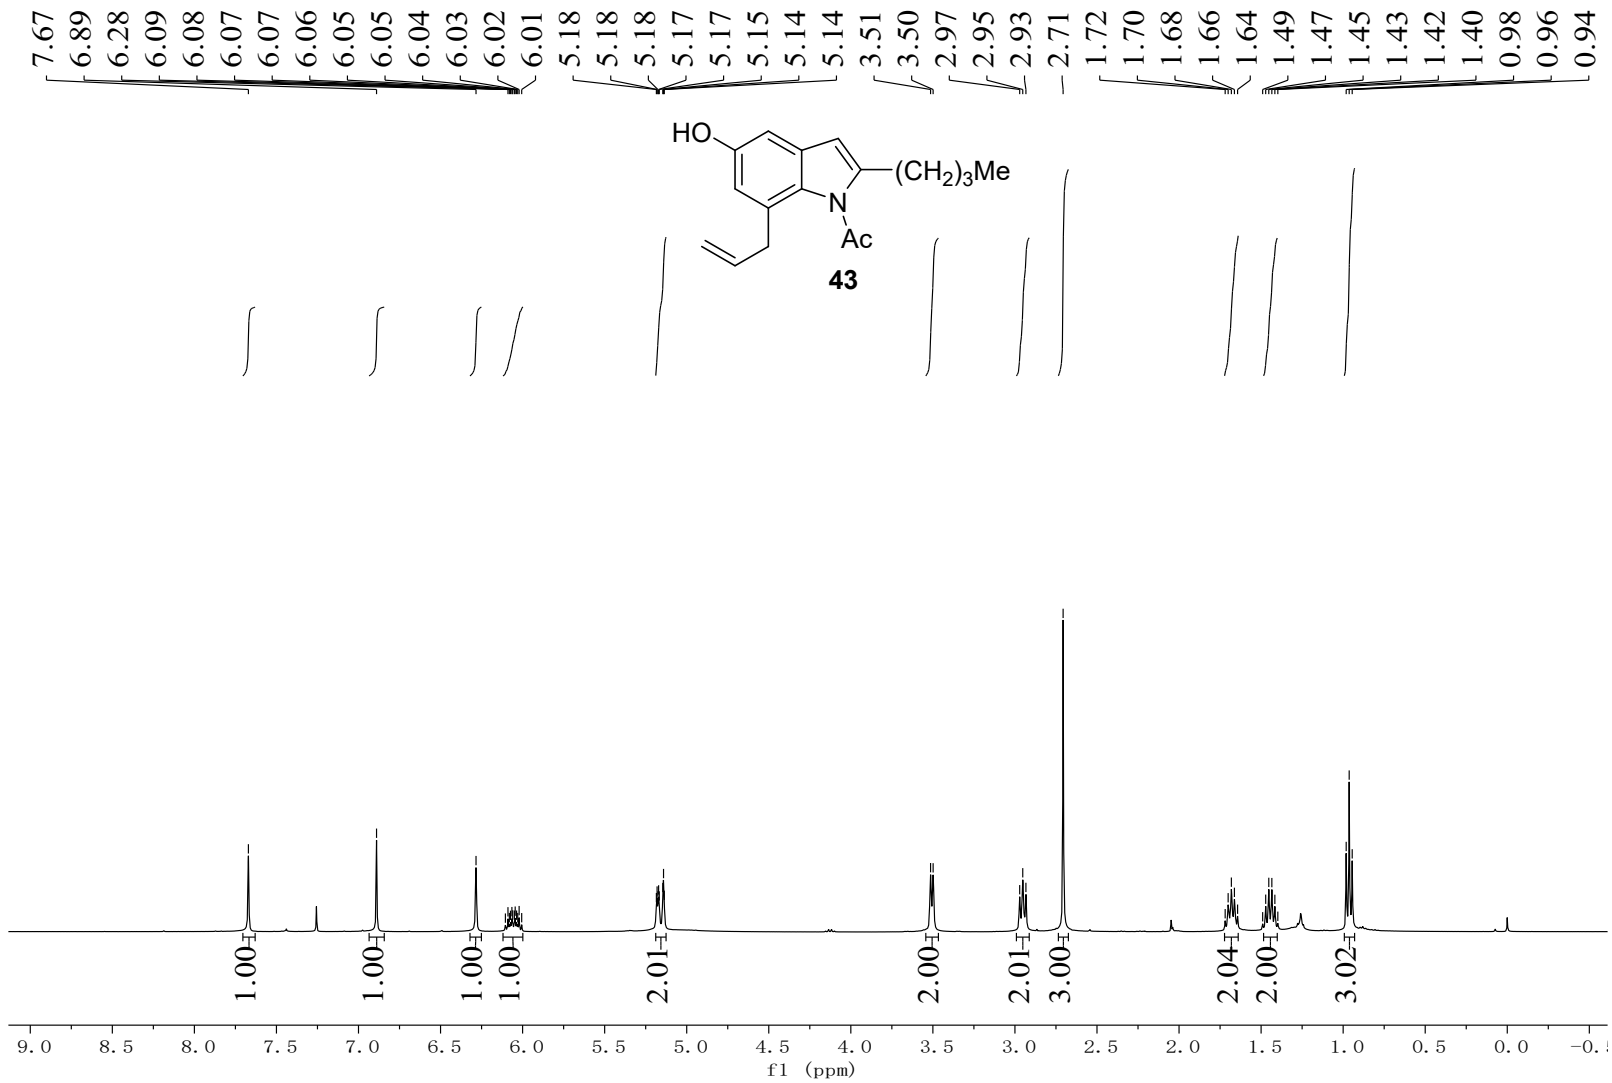

C-nBu[E]-C. 1. fid

~ 170.11

~ 150.53  
~ 143.02  
~ 136.81  
~ 131.56  
~ 129.69  
~ 121.97  
~ 116.66  
~ 116.39  
~ 107.95  
~ 105.90

~ 35.97  
~ 31.05  
~ 30.37  
~ 27.47  
~ 22.56  
~ 13.97

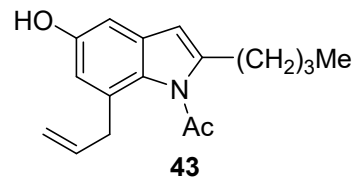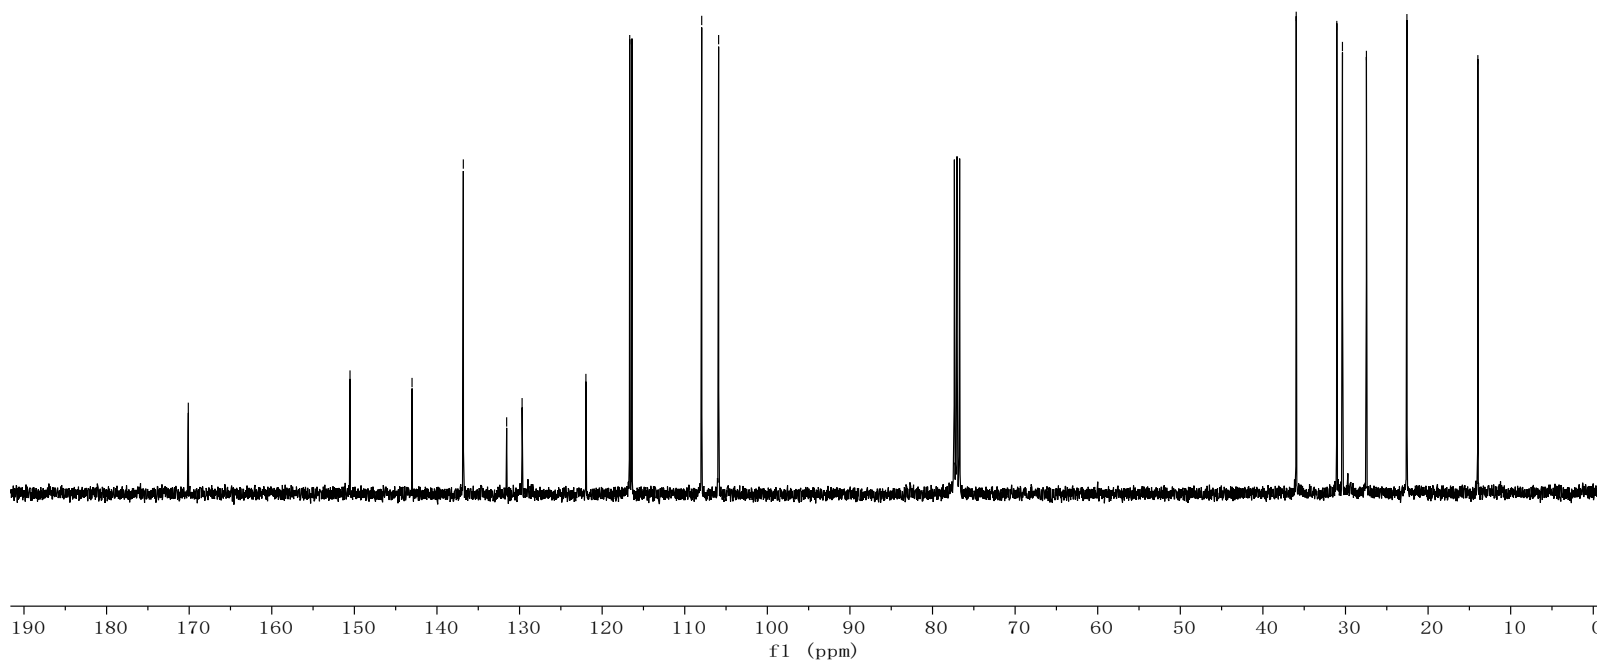

C-C12[E]. 1. fid

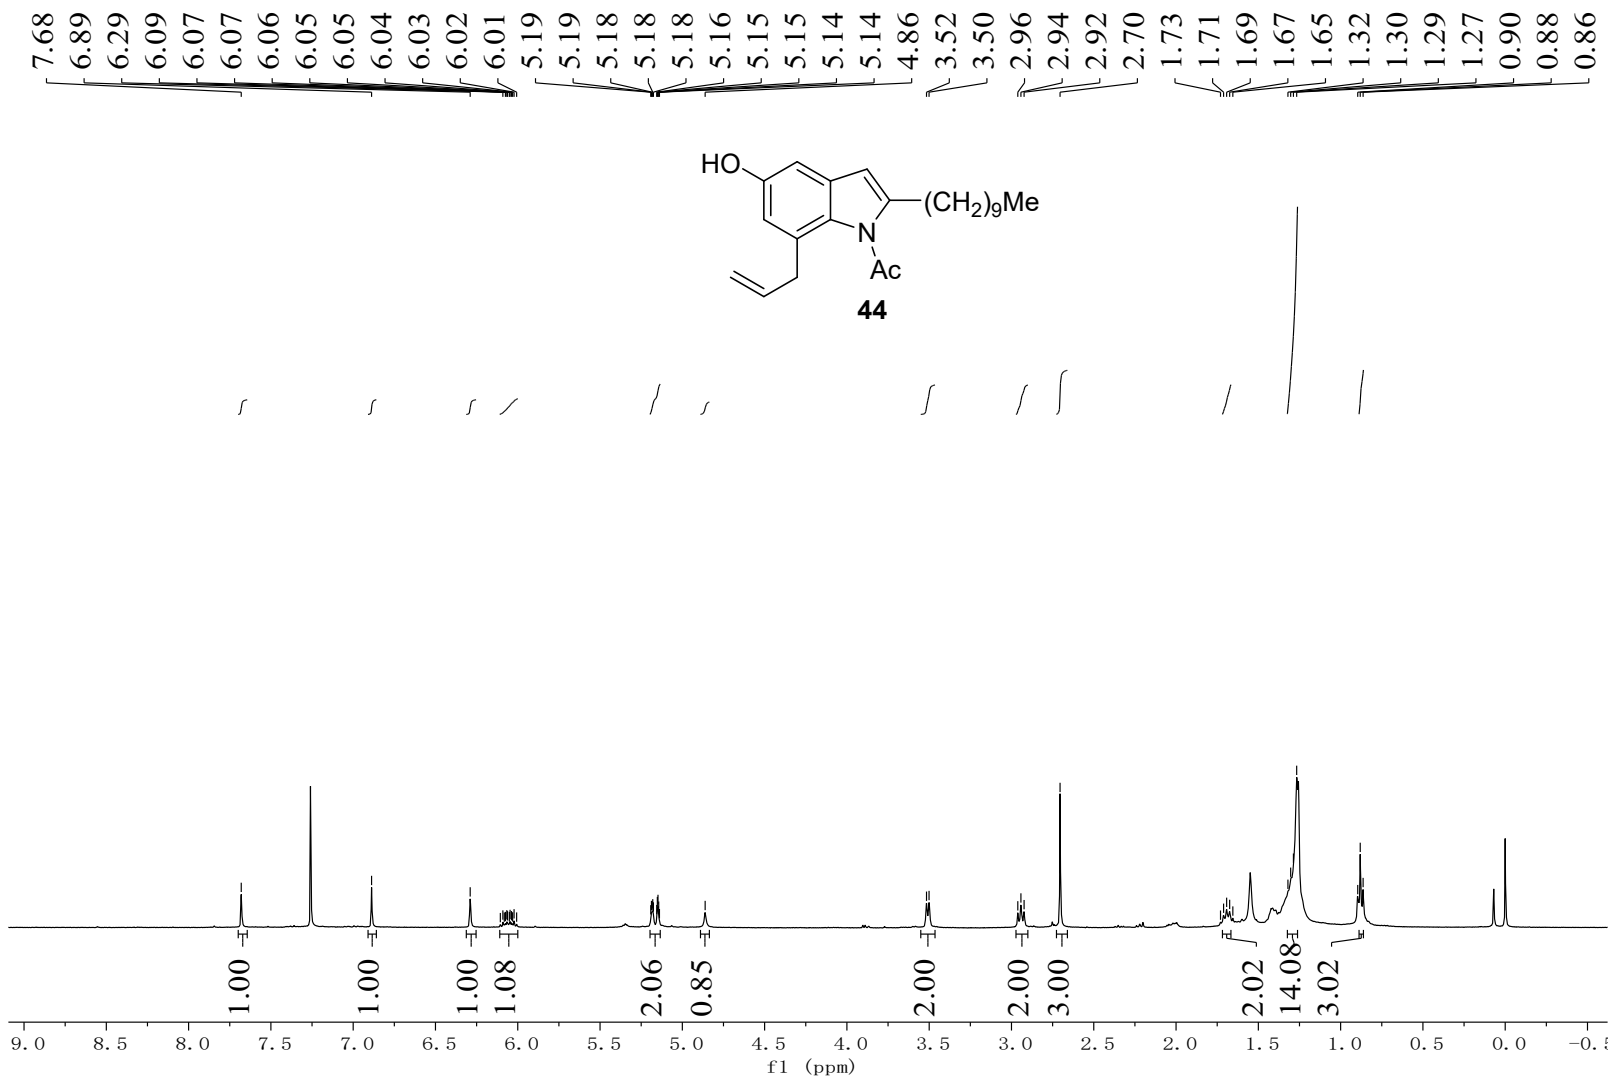



C-C12[E]-C. 1. fid

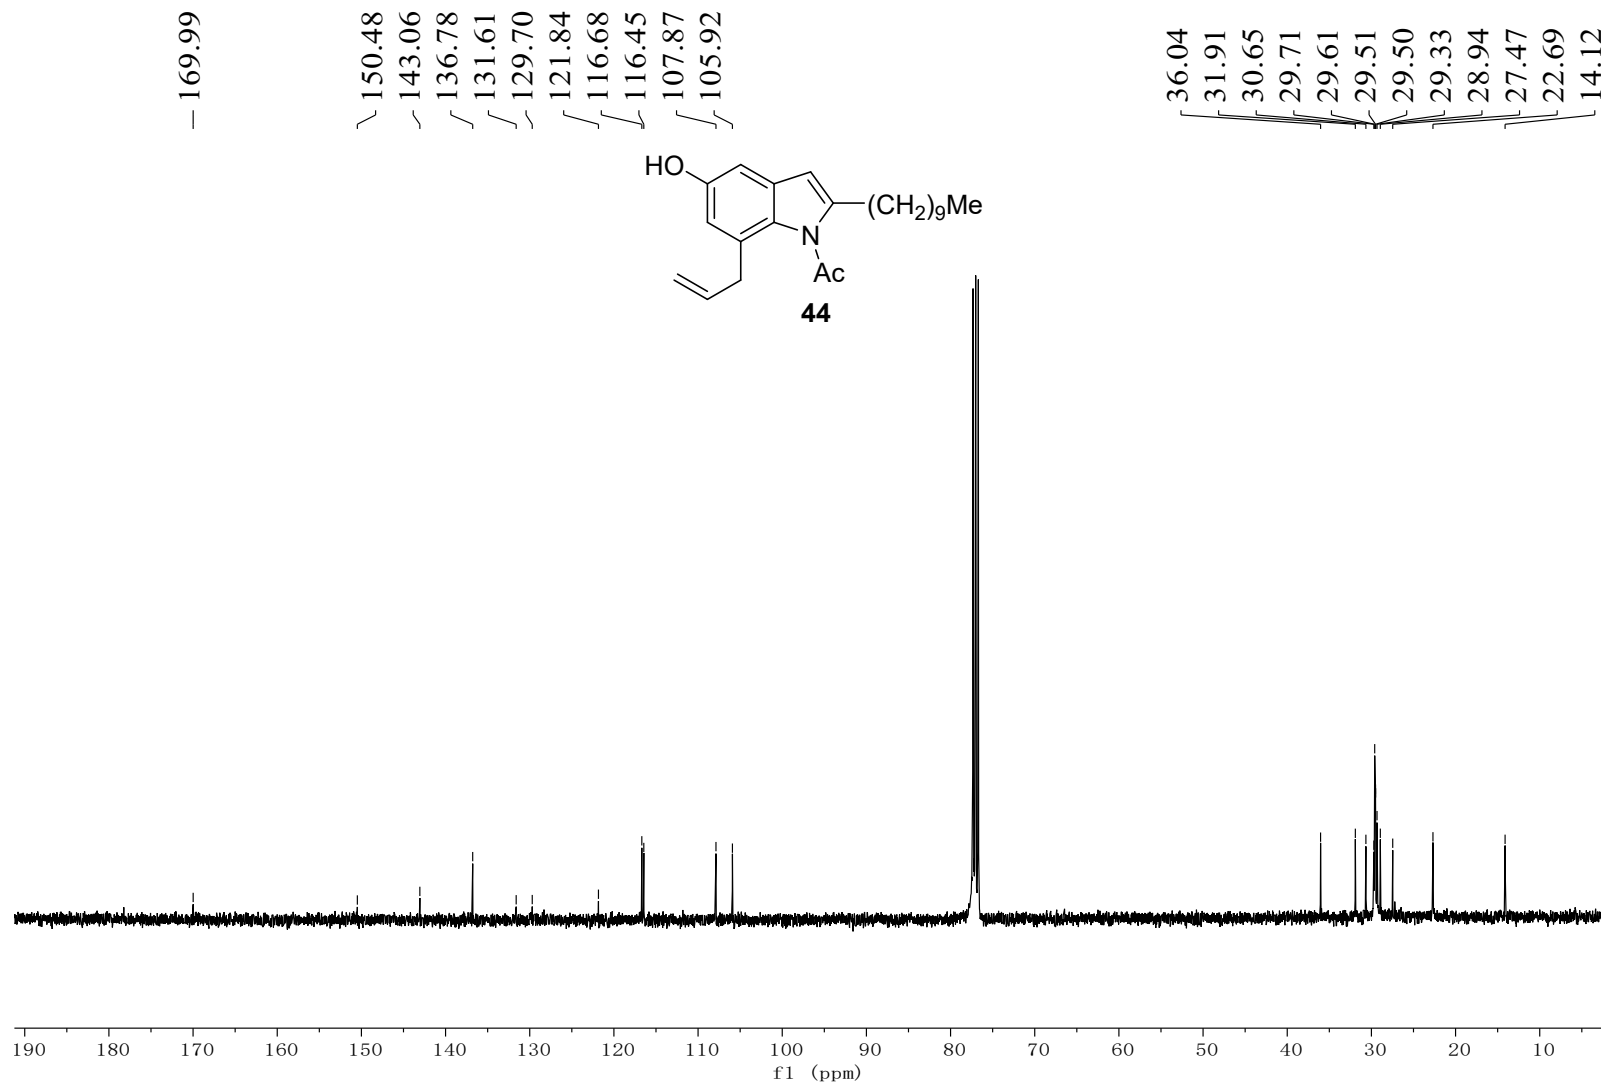

C-tBu[E]. 1. fid

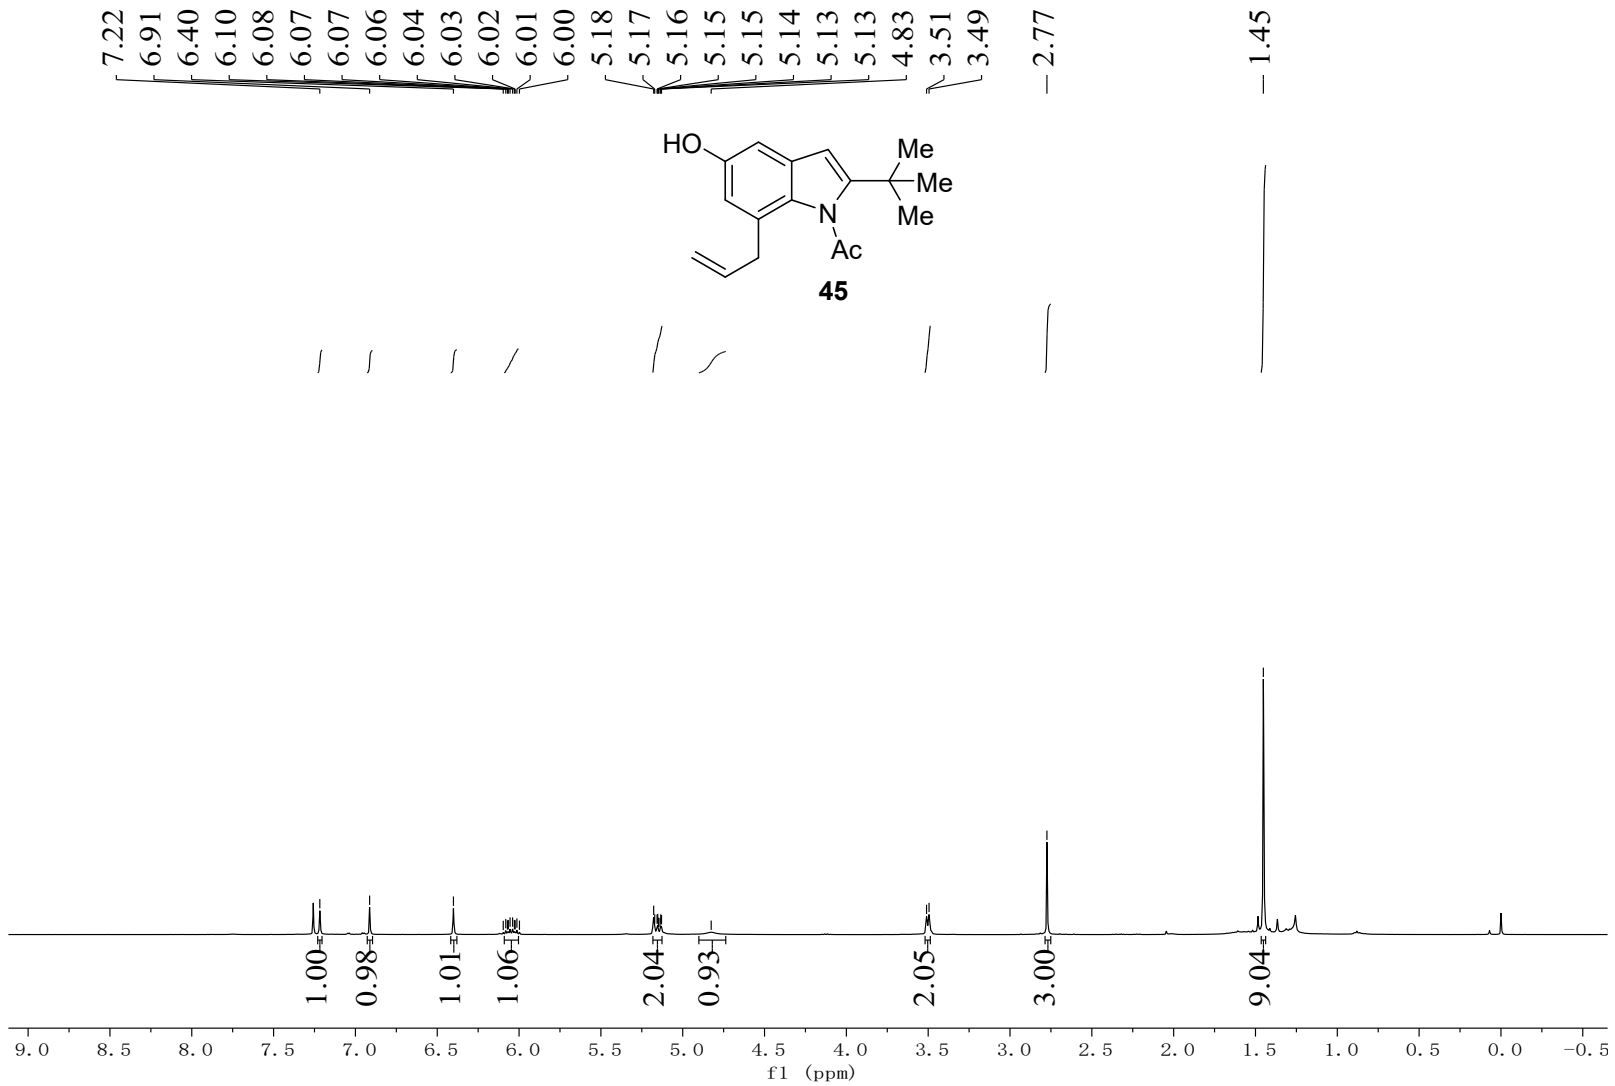

C-tBu[E]-C. 1. fid

~ 171.81

~ 152.31  
~ 149.93

~ 136.67  
~ 131.80  
~ 129.08  
~ 121.85  
~ 116.49  
~ 114.95  
~ 106.37  
~ 106.23

~ 35.88  
~ 34.19  
~ 30.50  
~ 28.06

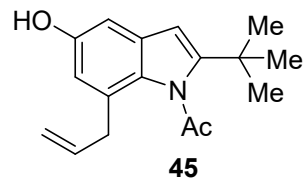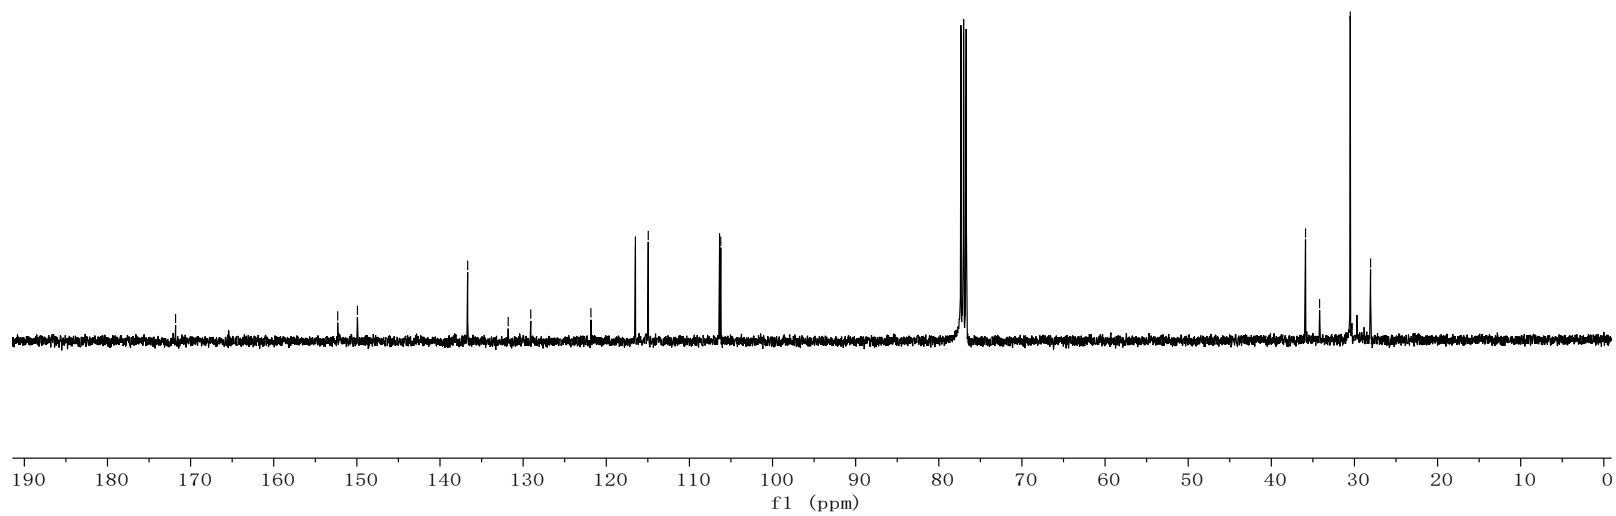

C-cH[E].1.fid

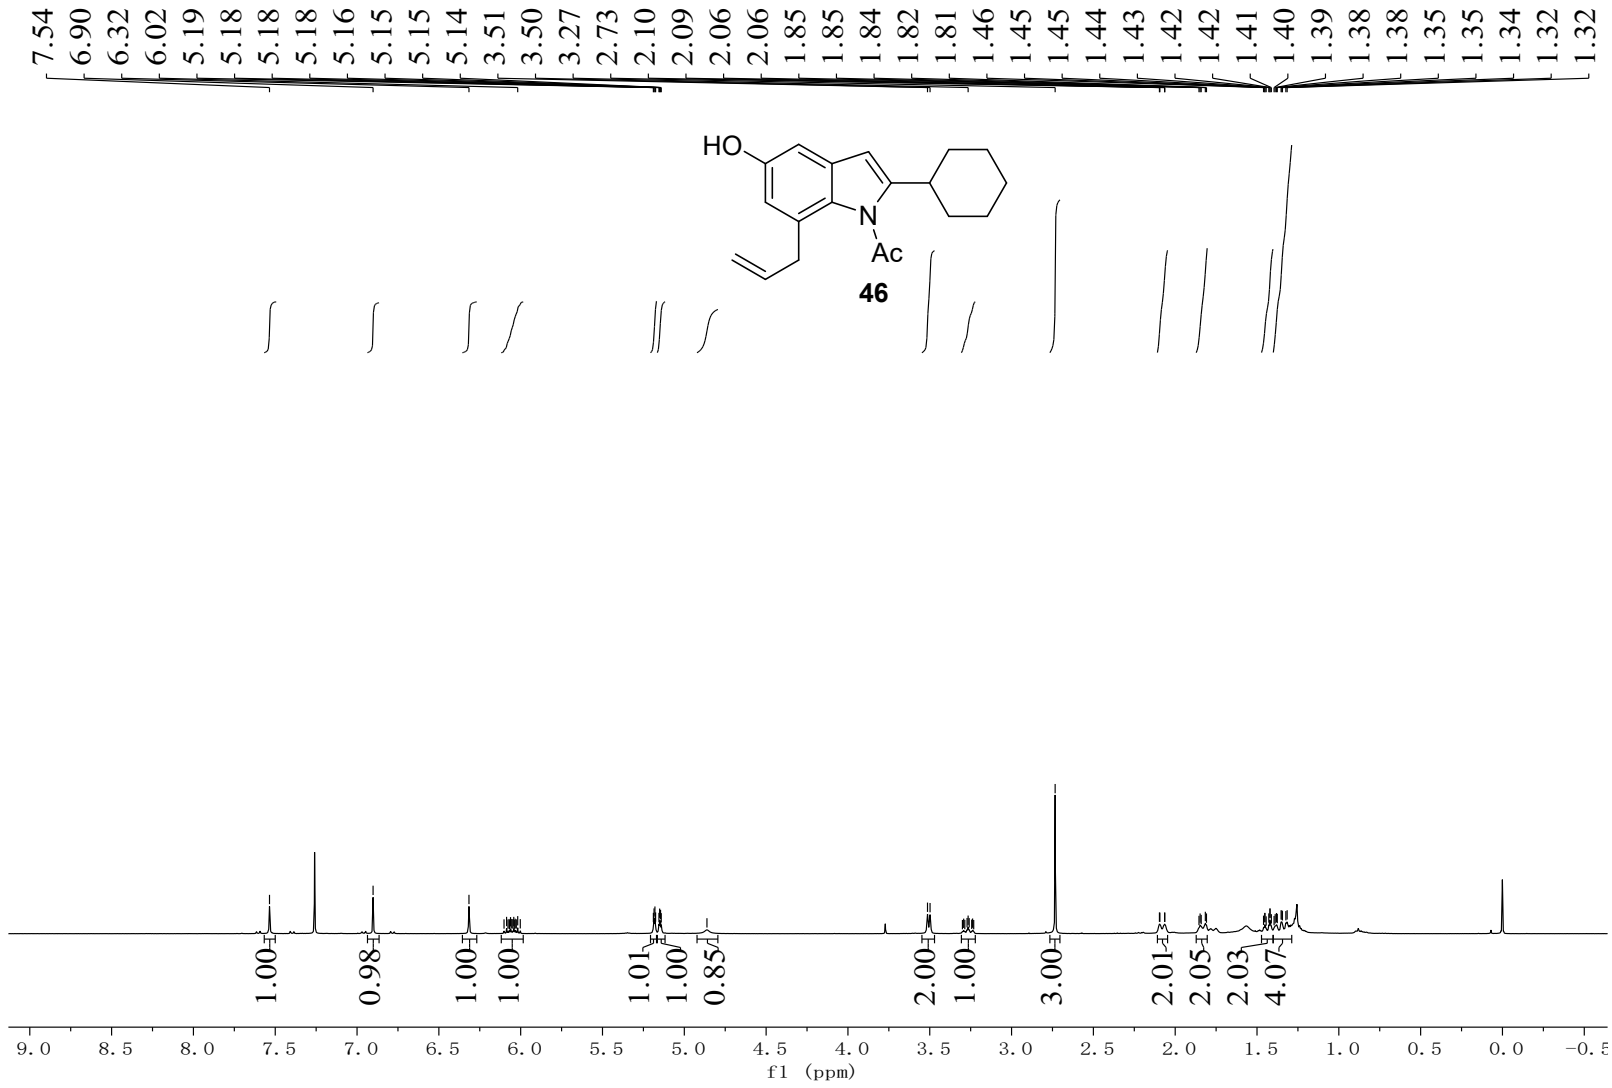

C-cH[E]-C. 1. fid

170.21

150.36  
149.17

136.75  
131.40  
129.90  
121.78  
116.46  
116.25

106.15  
105.62

38.01  
36.00  
33.90  
27.69  
26.64  
26.36

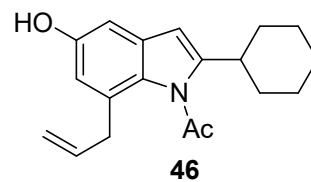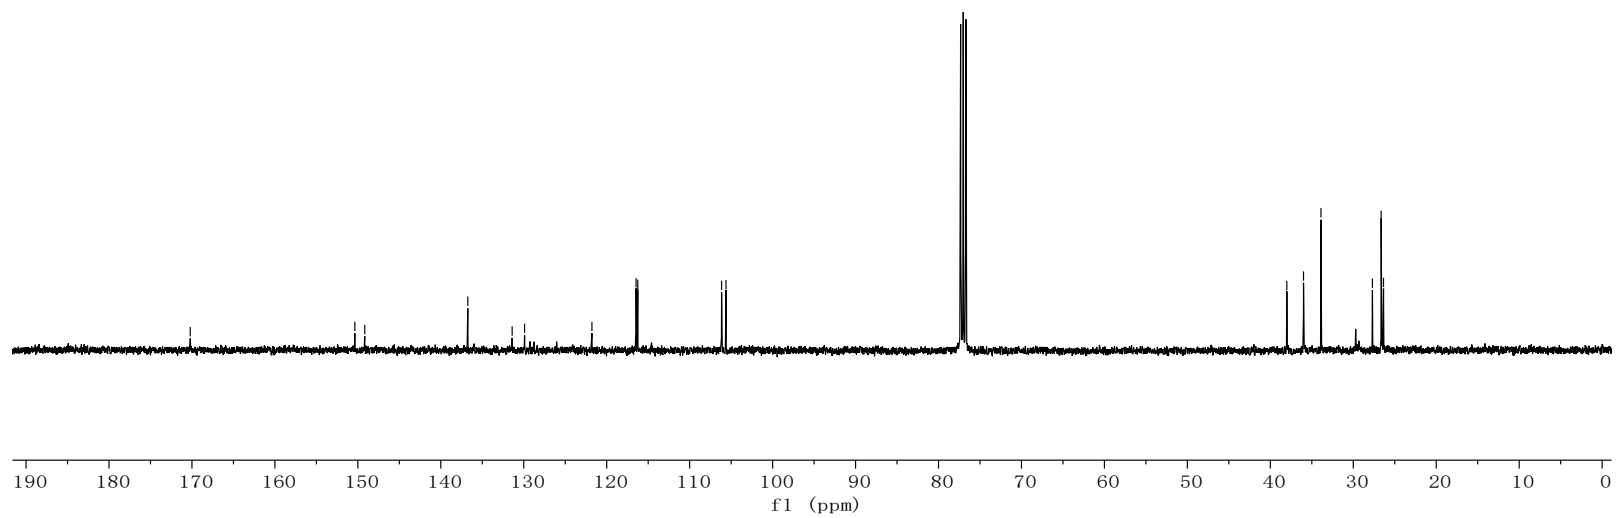

C-cP[E].1.fid

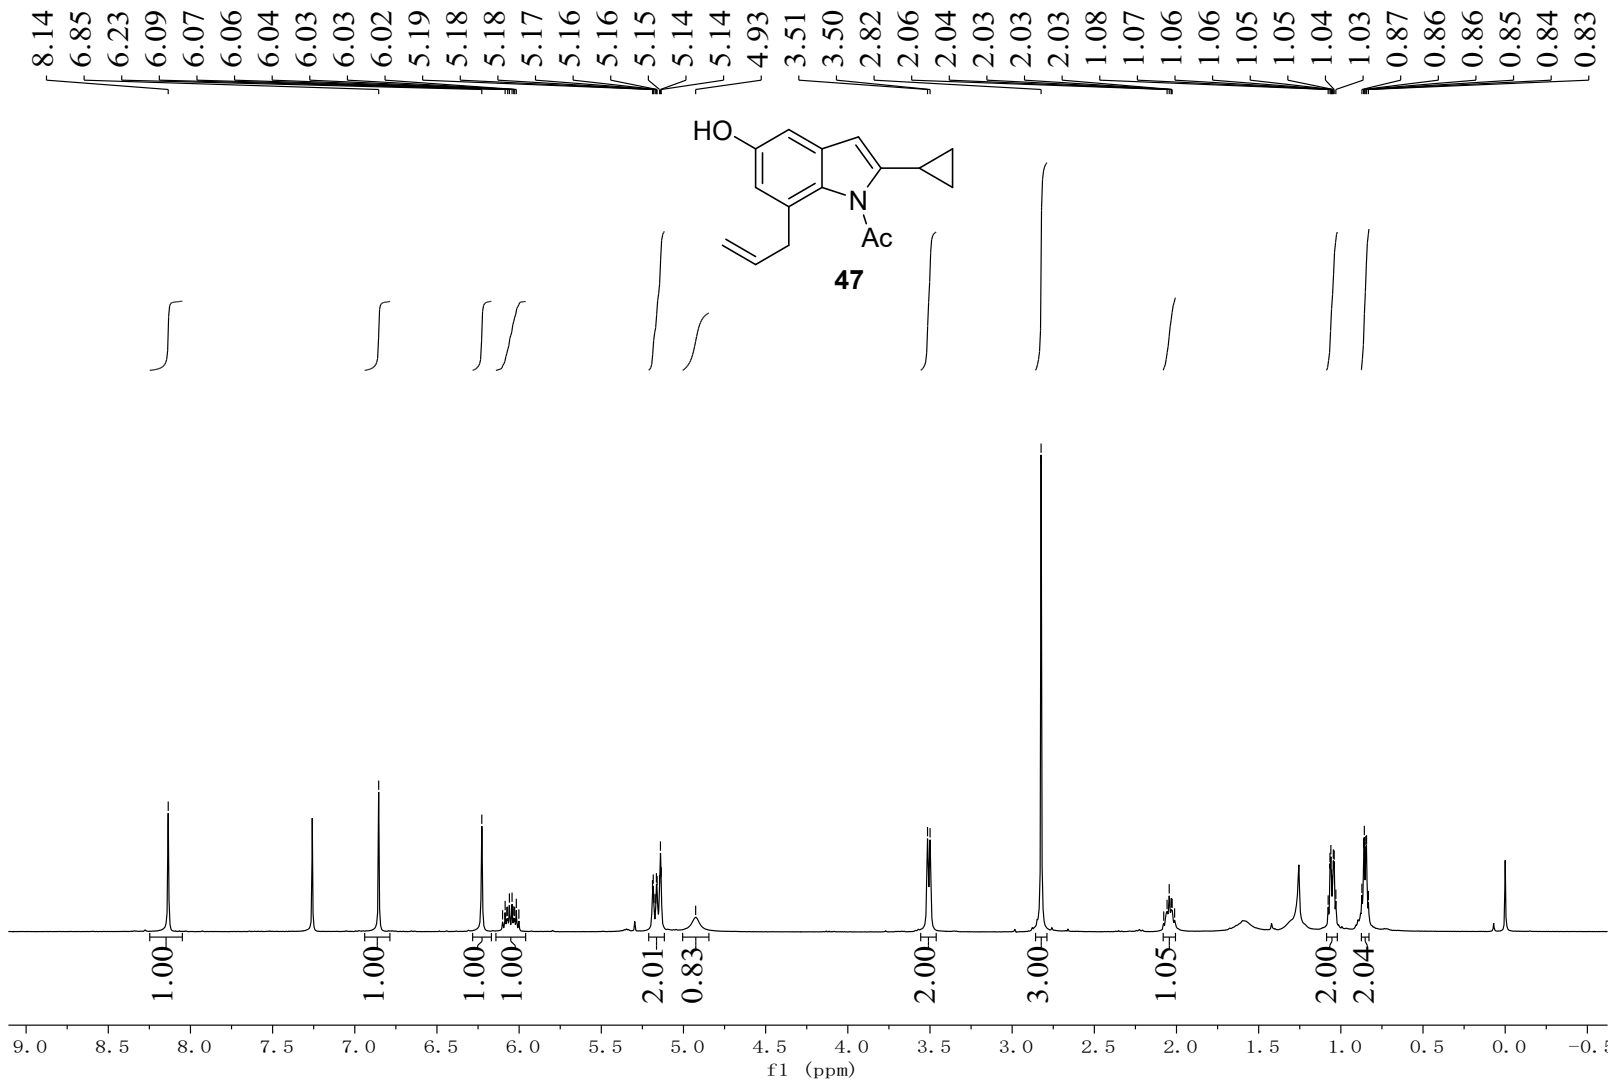

C-cP[E]-C. 1. fid

— 170.39

~ 150.84  
/ 142.42  
/ 136.87  
/ 132.45  
/ 128.77  
/ 122.73  
/ 118.11  
/ 116.35  
/ 108.46  
/ 105.71

— 36.13

— 27.03

~ 11.79

~ 8.54

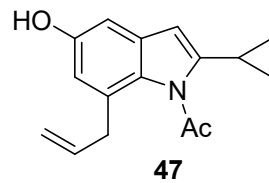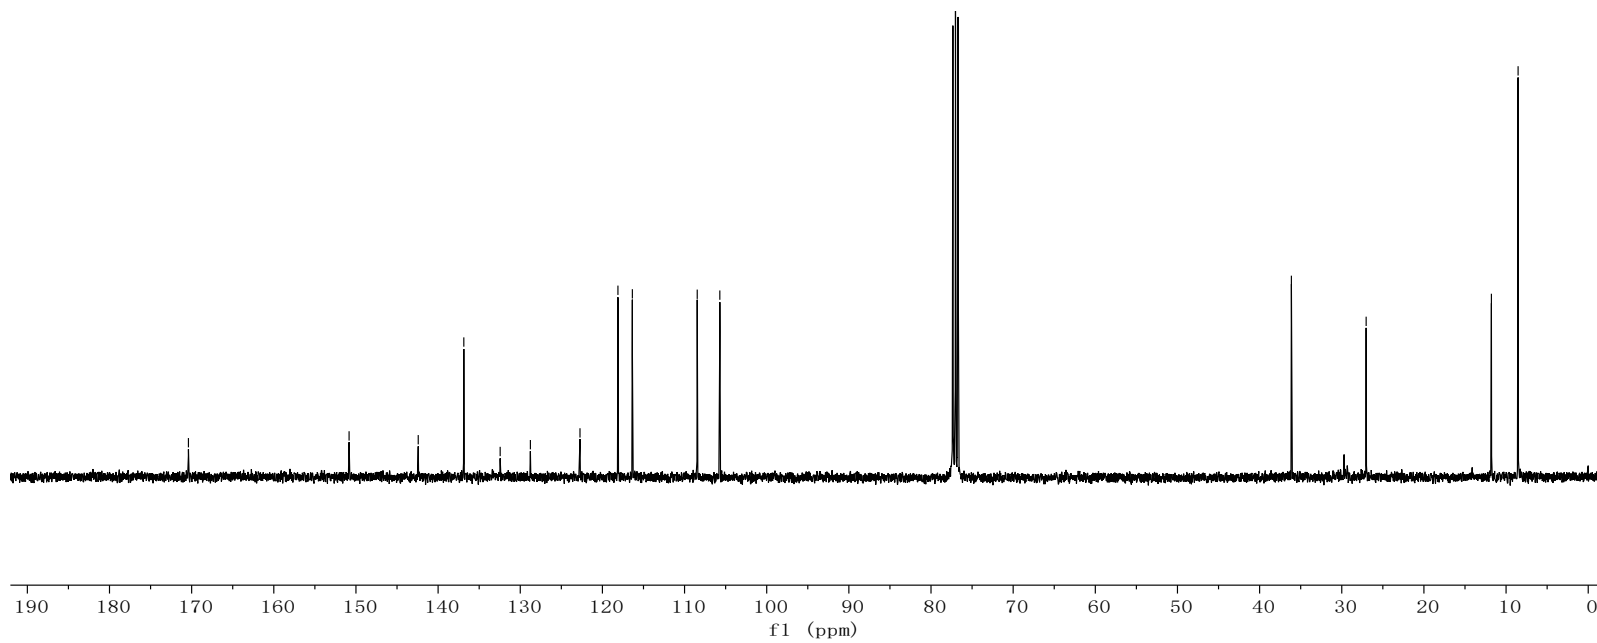

C-[D]. 1. 1. 1r

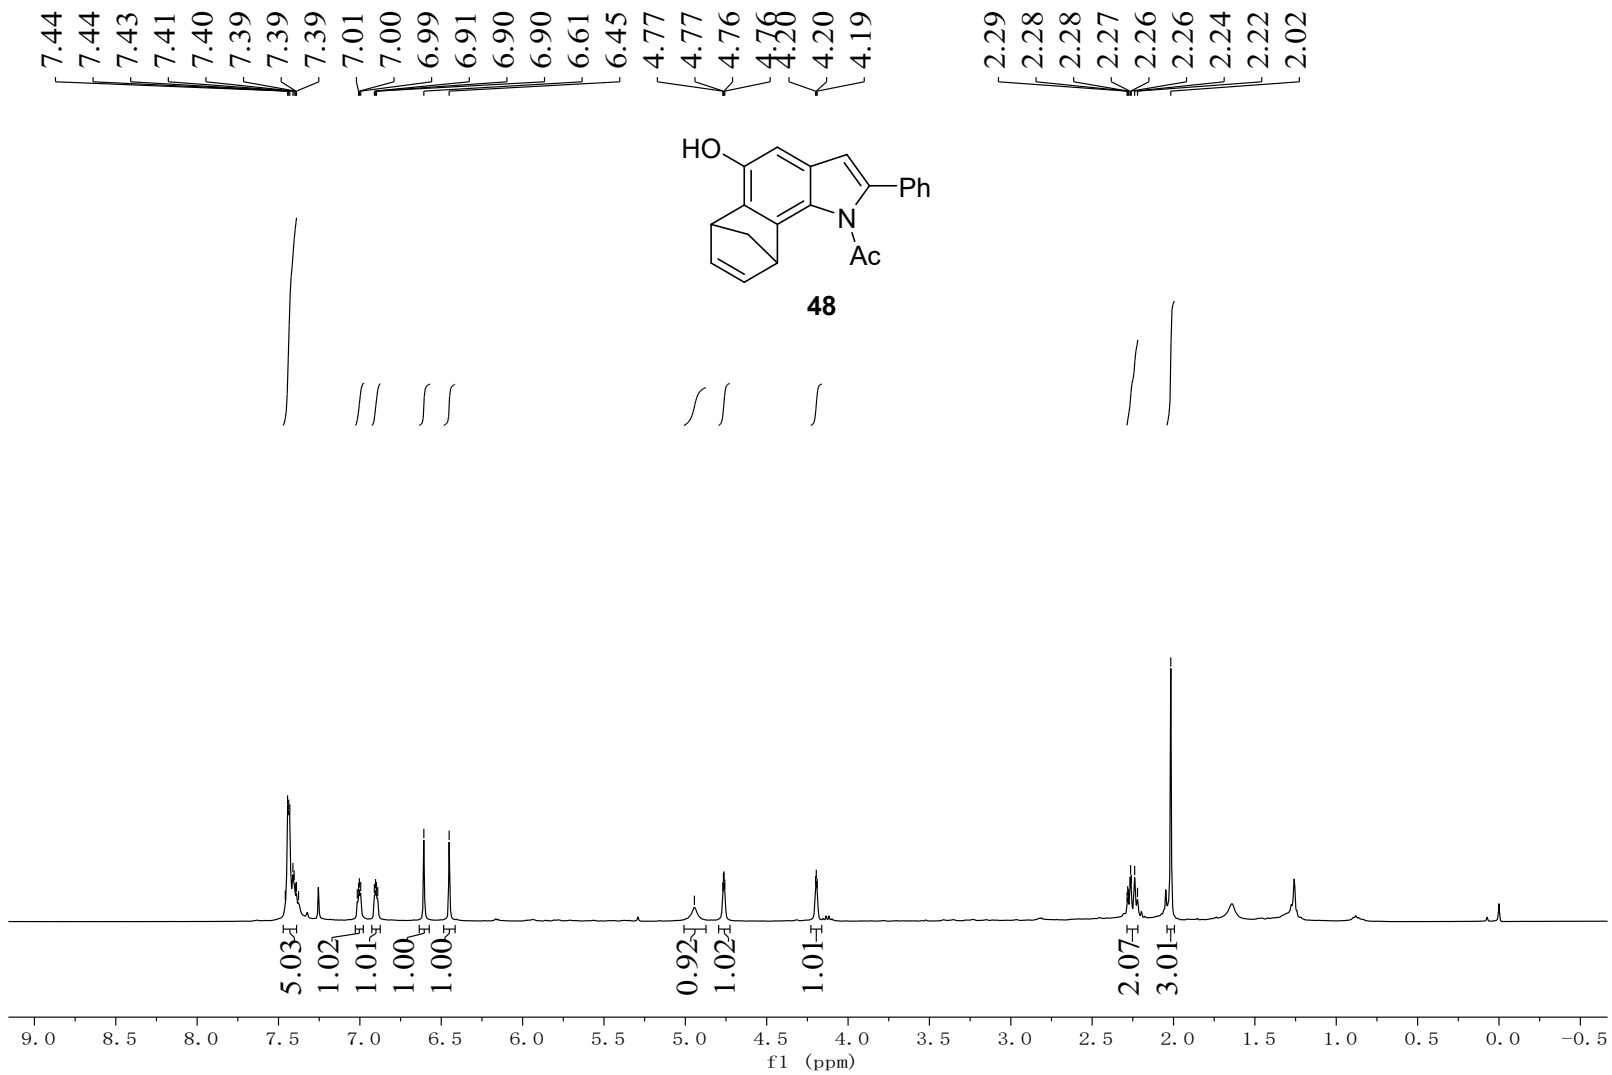



C-[D]-C. 1. 1. 1r

171.08  
147.04  
143.83  
143.18  
140.75  
140.50  
136.51  
134.50  
129.29  
128.84  
128.76  
128.73  
128.48  
112.08  
102.99  
69.02  
52.40  
46.54  
28.02

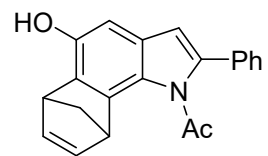

48

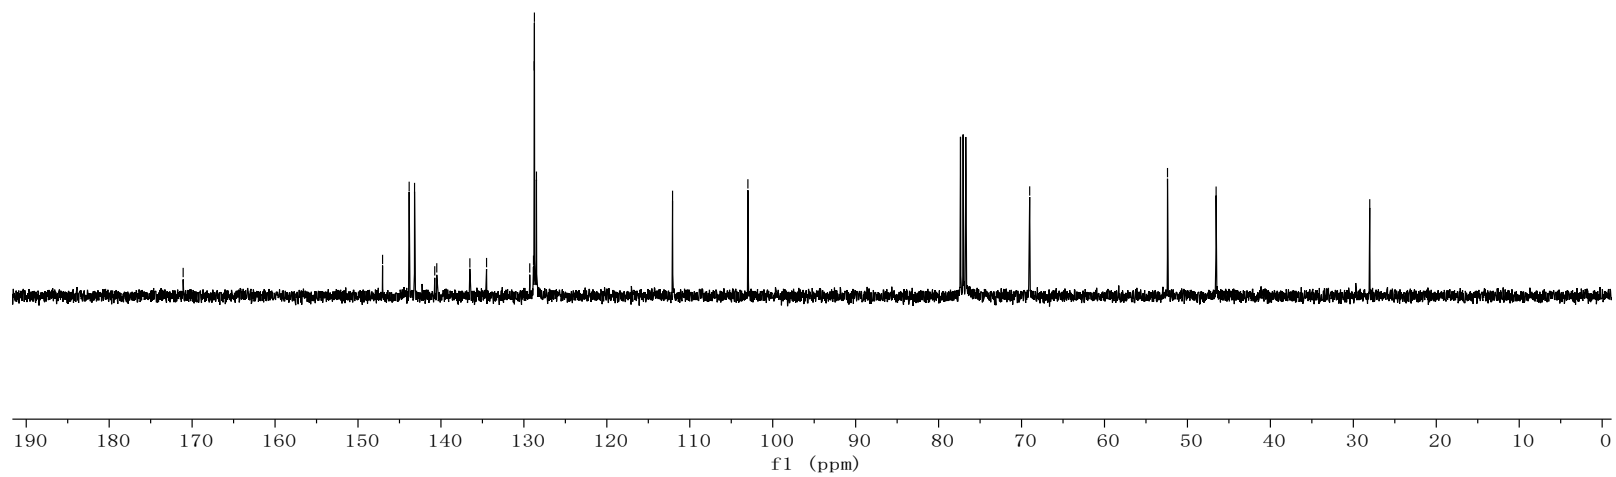

C-2Me[DA]. 1. fid

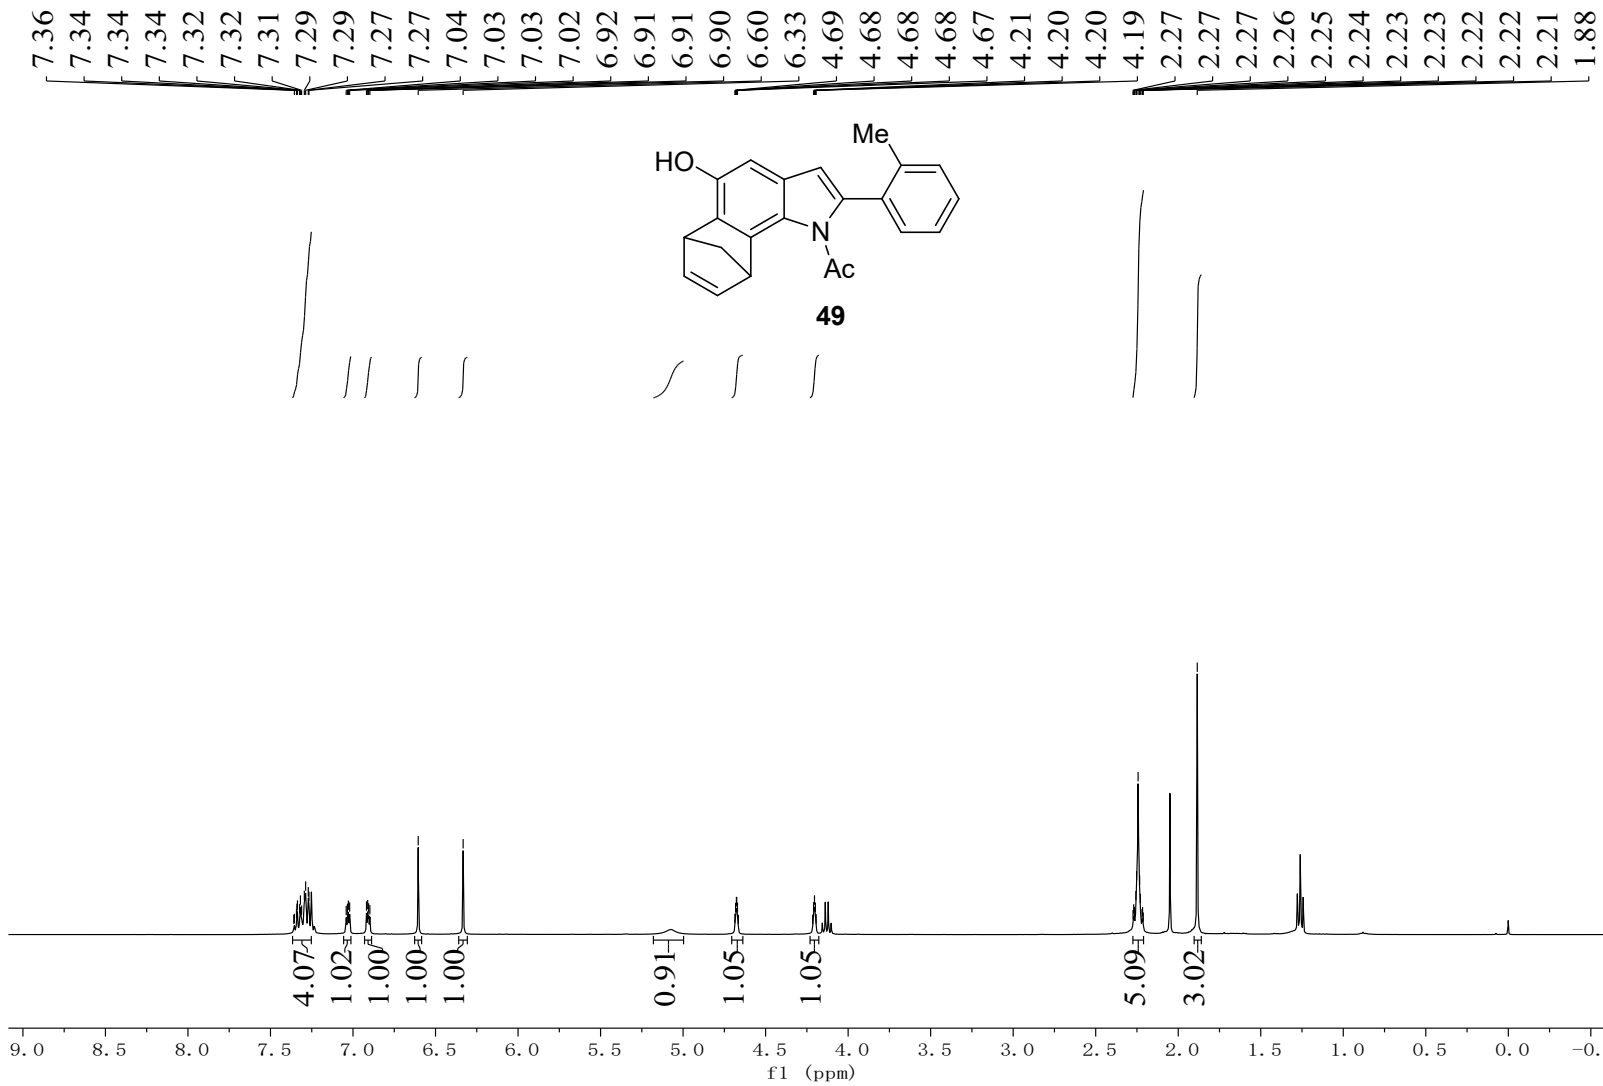

C-2Me[DA]-C. 1. fid

170.38  
147.12  
143.75  
143.27  
141.06  
138.91  
137.52  
136.26  
134.18  
130.46  
130.35  
129.42  
129.14  
127.93  
126.04  
— 111.62  
— 102.79

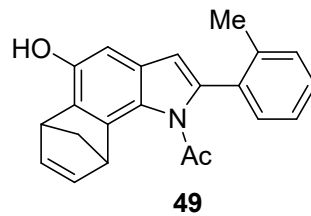

— 68.73

— 52.60

— 46.51

— 26.42

— 20.07

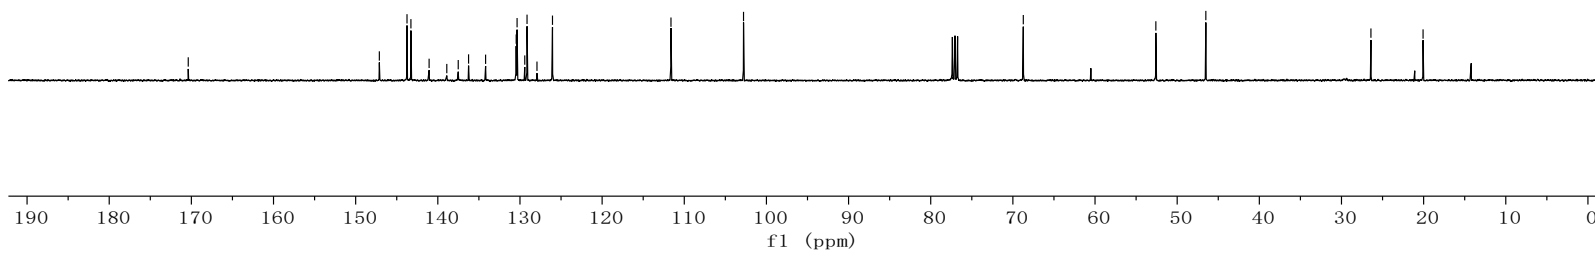

C-3Me[D]. 1. 1. 1r

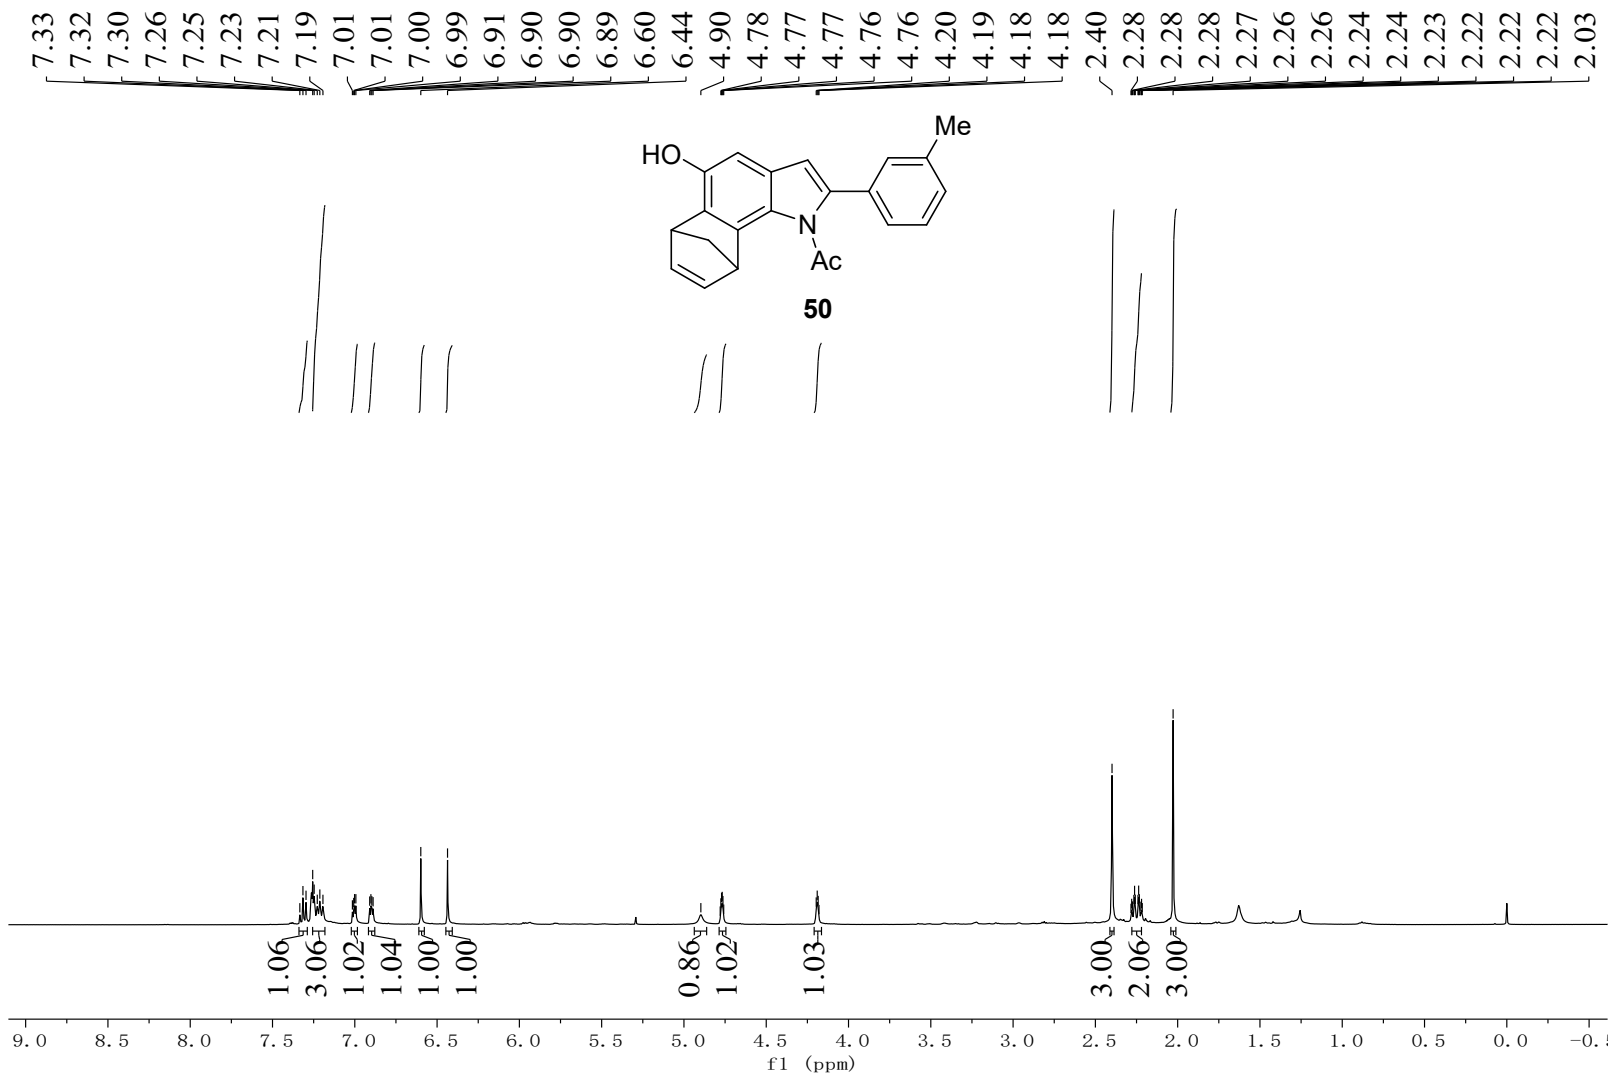

C-3Me[D]-C. 1. 1. 1r

171.17  
147.00  
143.86  
143.16  
140.75  
140.71  
138.52  
136.38  
134.42  
129.34  
129.32  
129.24  
128.84  
128.61  
125.88  
- 111.90  
- 102.96

- 69.01

- 52.41

- 46.53

- 28.02

- 21.41

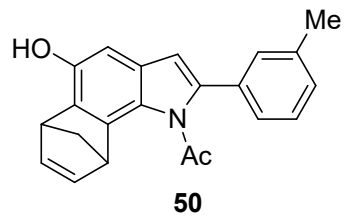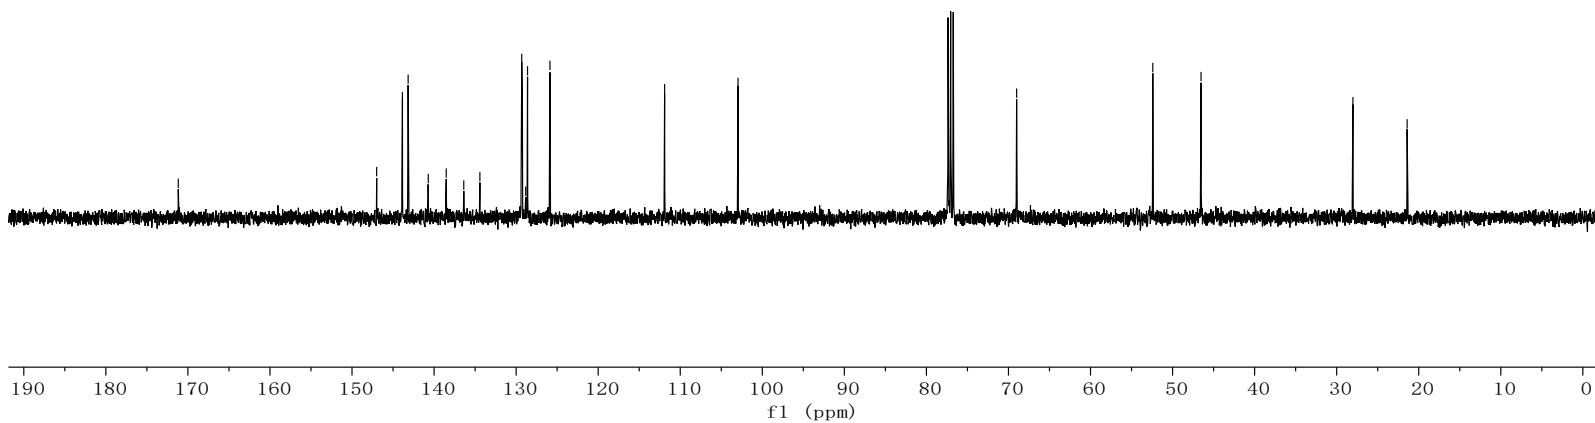

C-4Me[D]. 1. 1. 1r

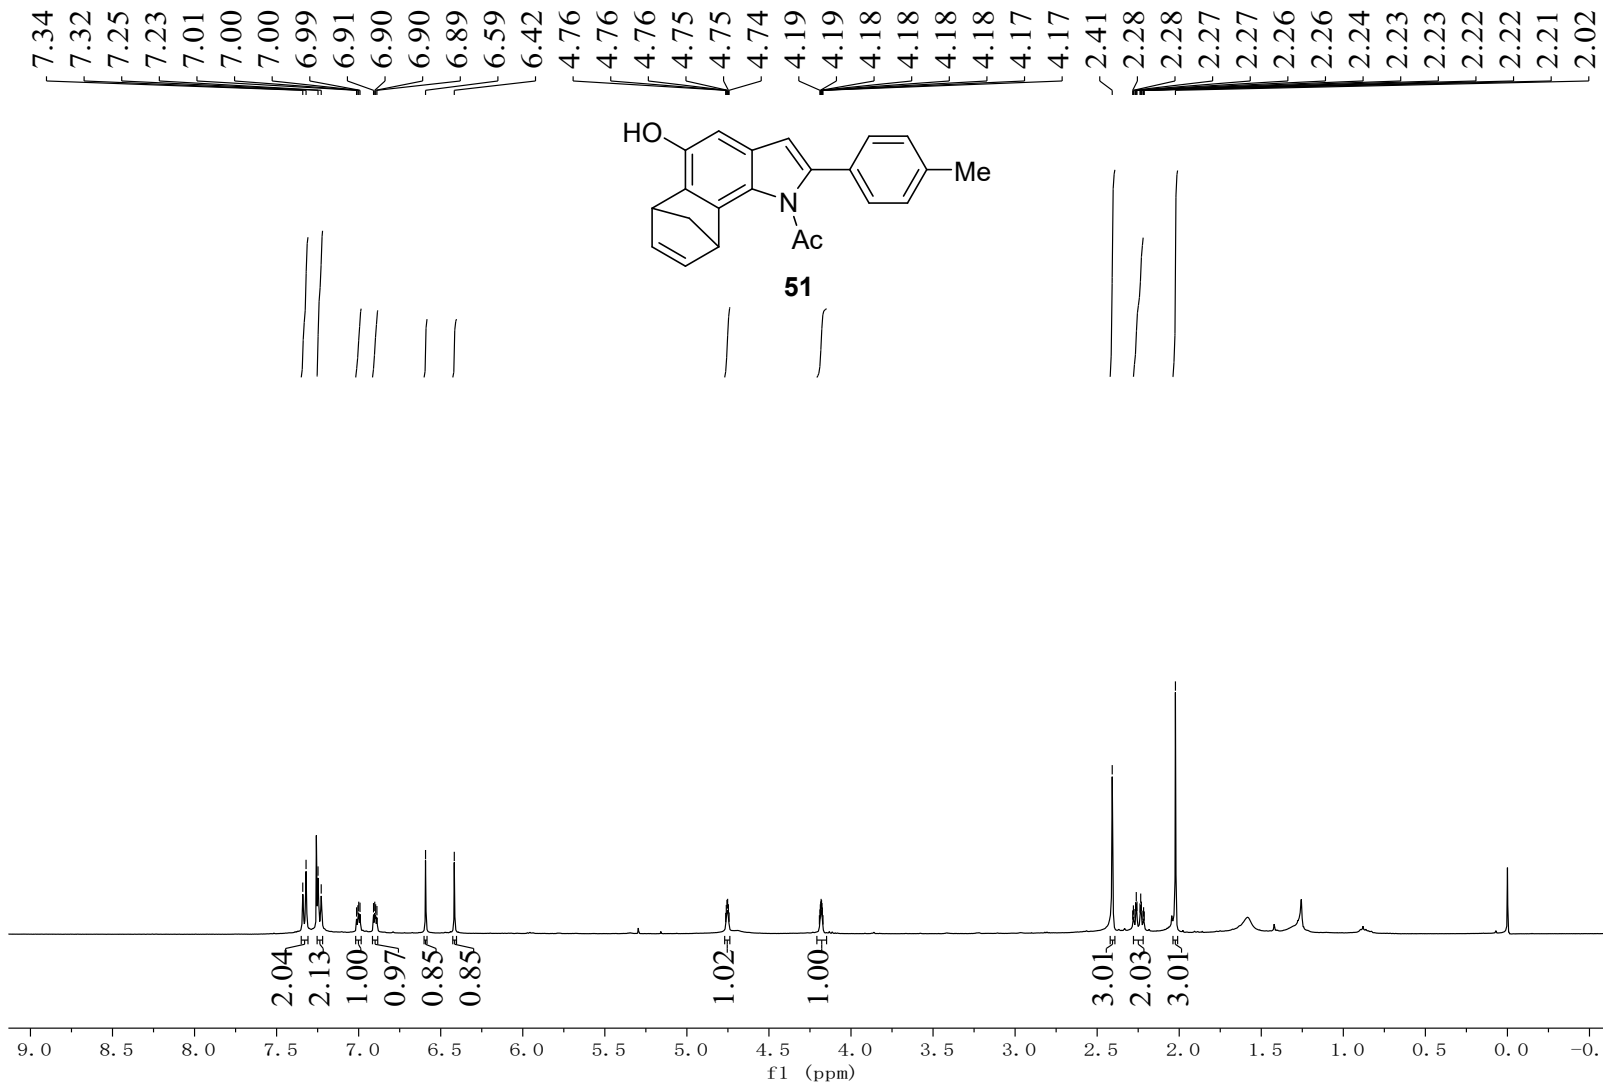

C-4Me[D]-C. 1. 1. 1r

171.12  
146.92  
143.83  
143.14  
140.67  
138.52  
136.21  
131.57  
129.41  
129.37  
128.79  
128.67  
111.62  
102.84  
68.98  
52.38  
46.50  
28.01  
21.32

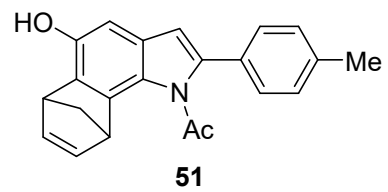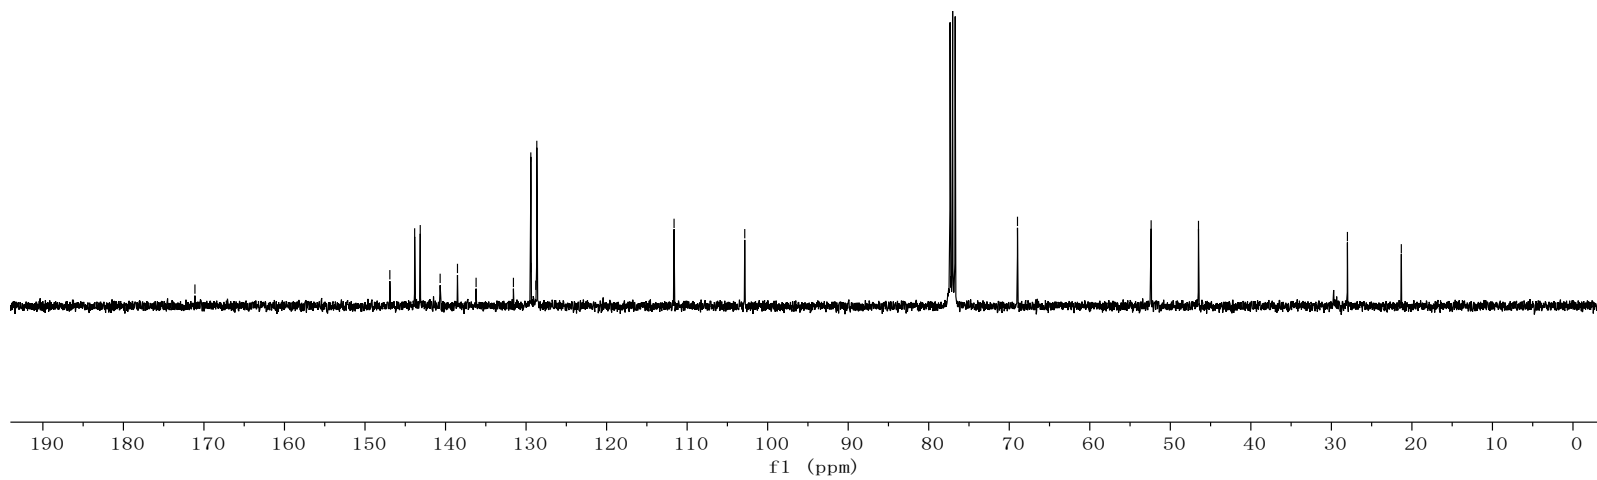

C-2Cl[D]. 1. fid

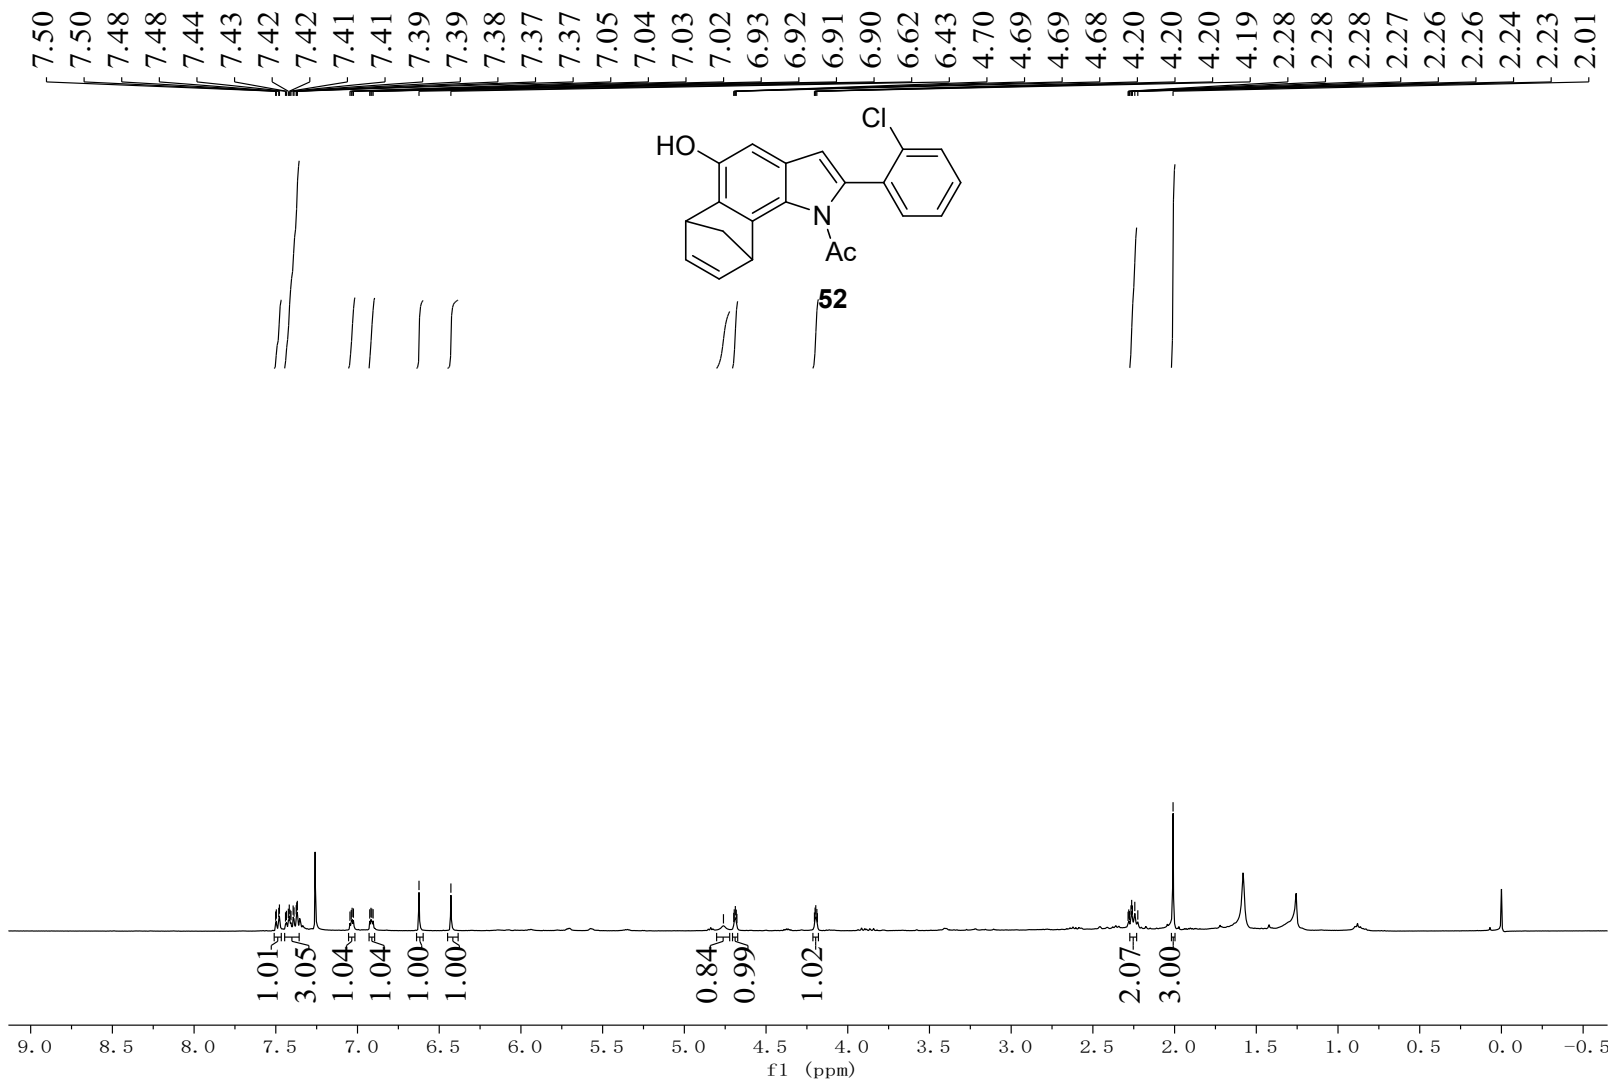



C-2Cl[D]-C-1. 1. fid

169.75  
147.00  
143.80  
143.19  
141.08  
136.79  
136.42  
133.85  
131.91  
130.39  
130.34  
129.90  
129.86  
129.08  
127.03

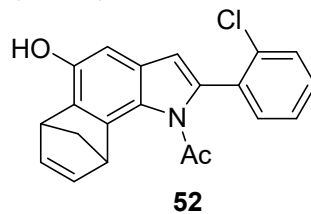

— 112.67  
— 102.98  
— 68.85  
— 52.61  
— 46.52  
— 26.14

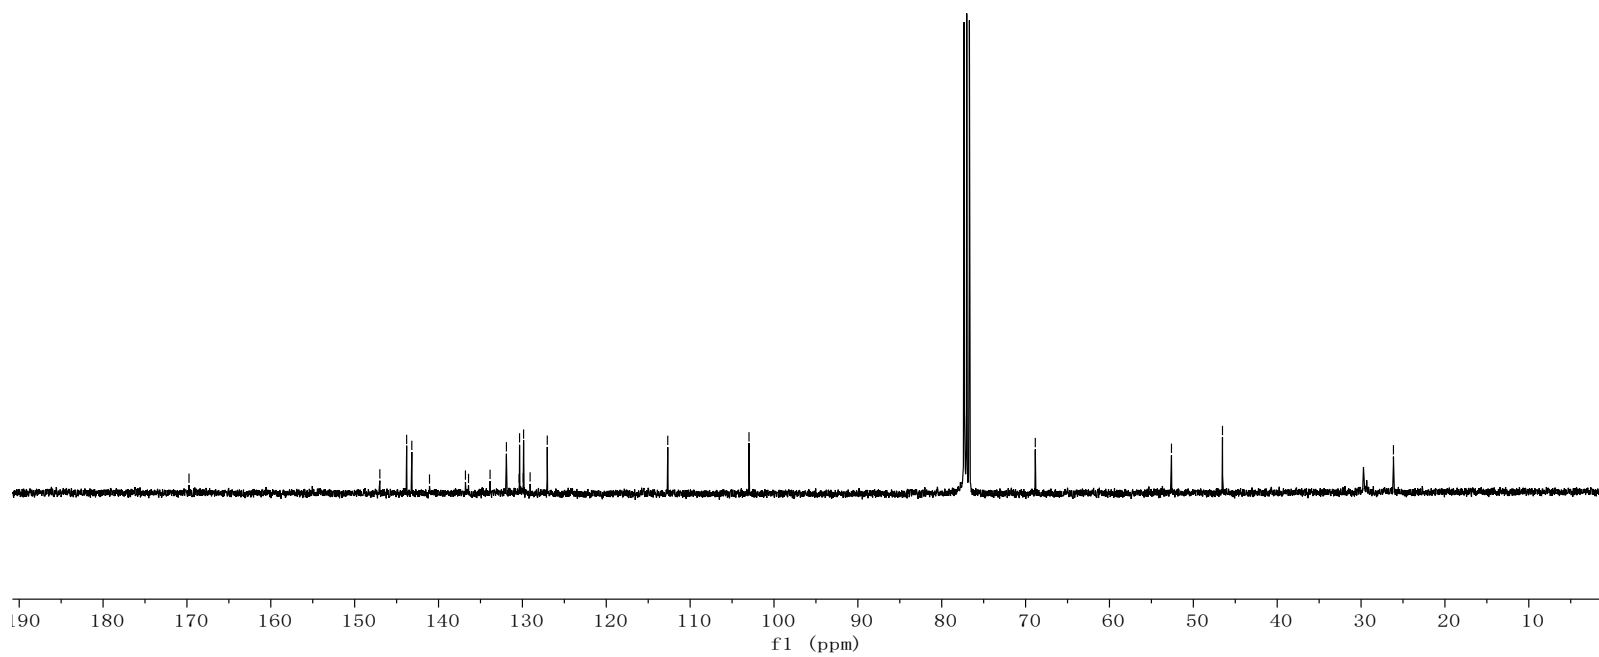

C-3Cl[D]. 1. fid

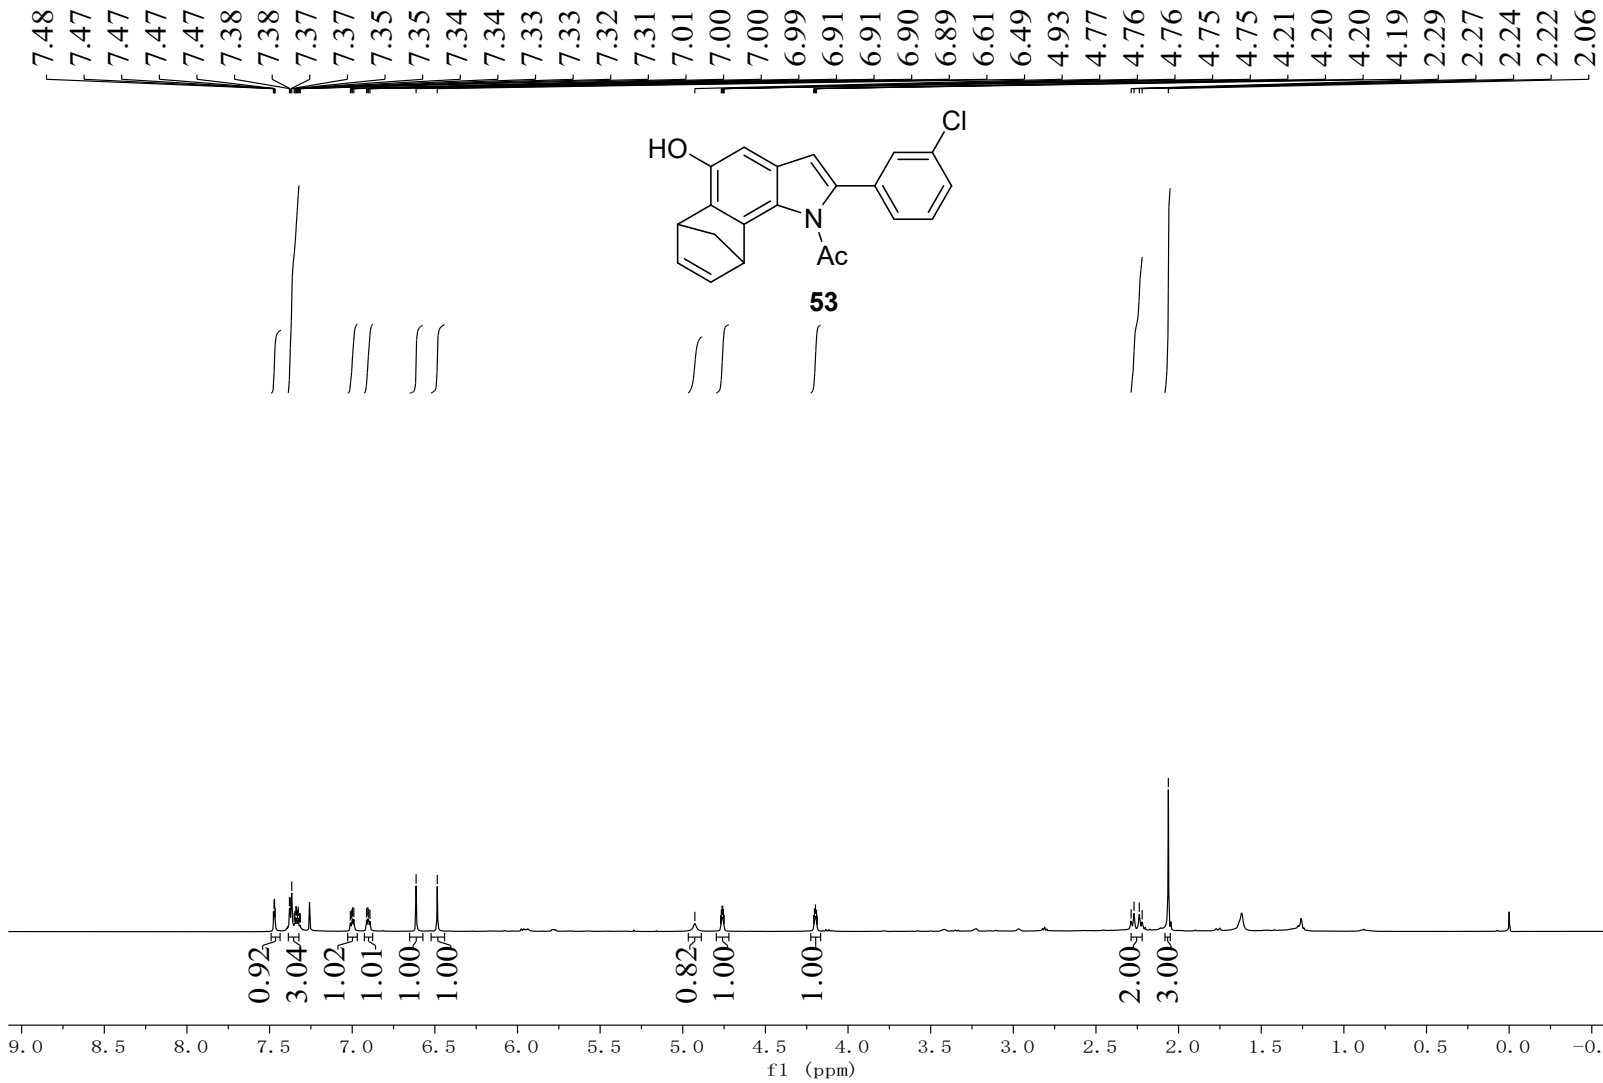

C-3Cl[D]-C. 1. fid

170.62  
147.13  
143.82  
143.15  
140.87  
138.88  
137.06  
136.93  
136.22  
134.76  
129.96  
129.03  
128.52  
128.50  
126.82

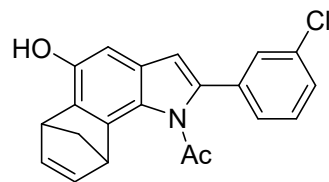

**53**

— 69.11  
— 52.42  
— 46.58  
— 28.14

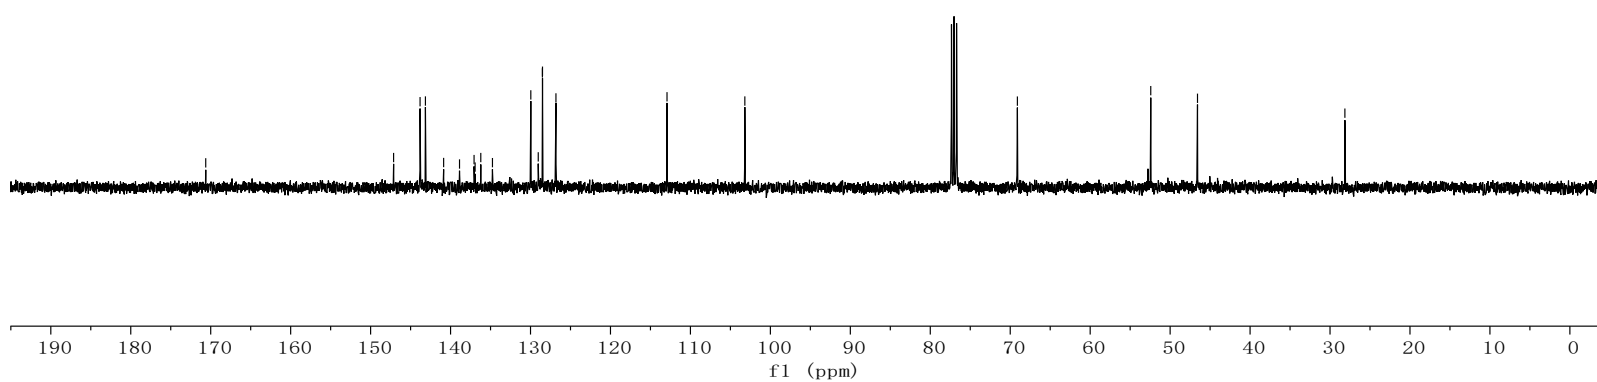

C-4Cl[DA]. 1. fid

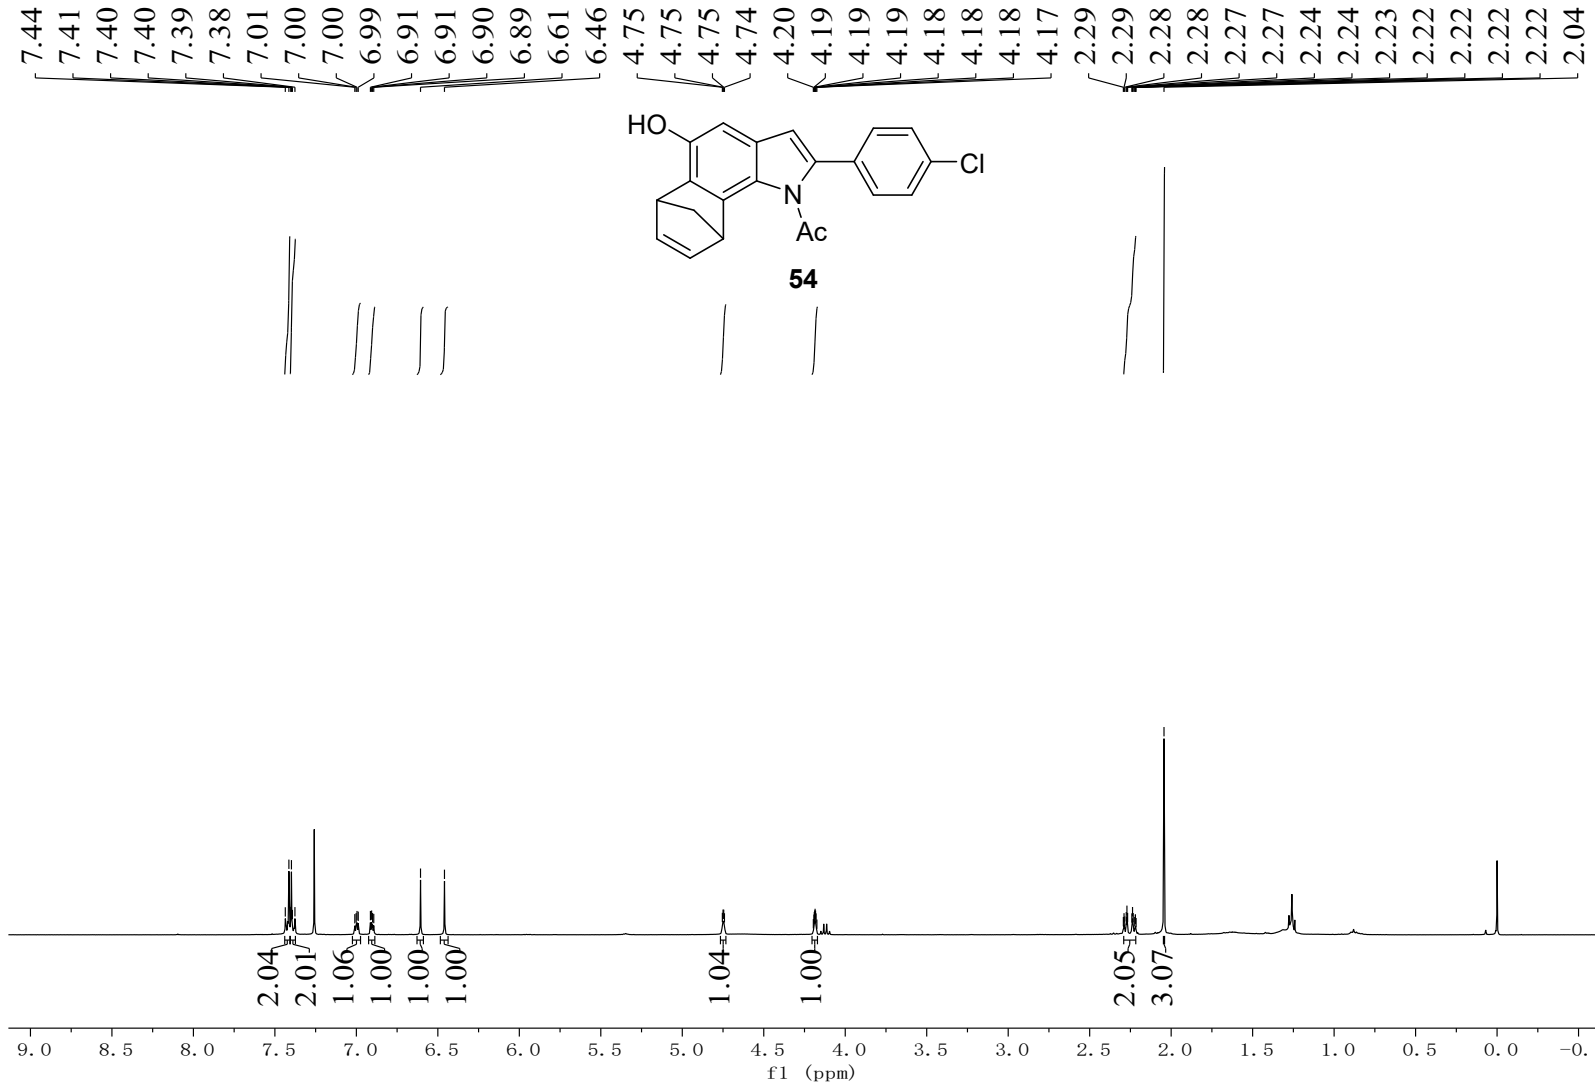

C-4Cl[DA]-C. 15. fid  
13C

170.65  
147.00  
143.79  
143.12  
140.80  
139.18  
136.79  
134.58  
132.93  
129.87  
129.12  
129.02  
128.97

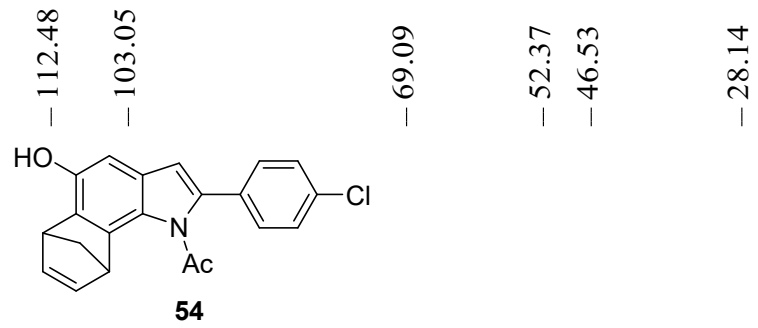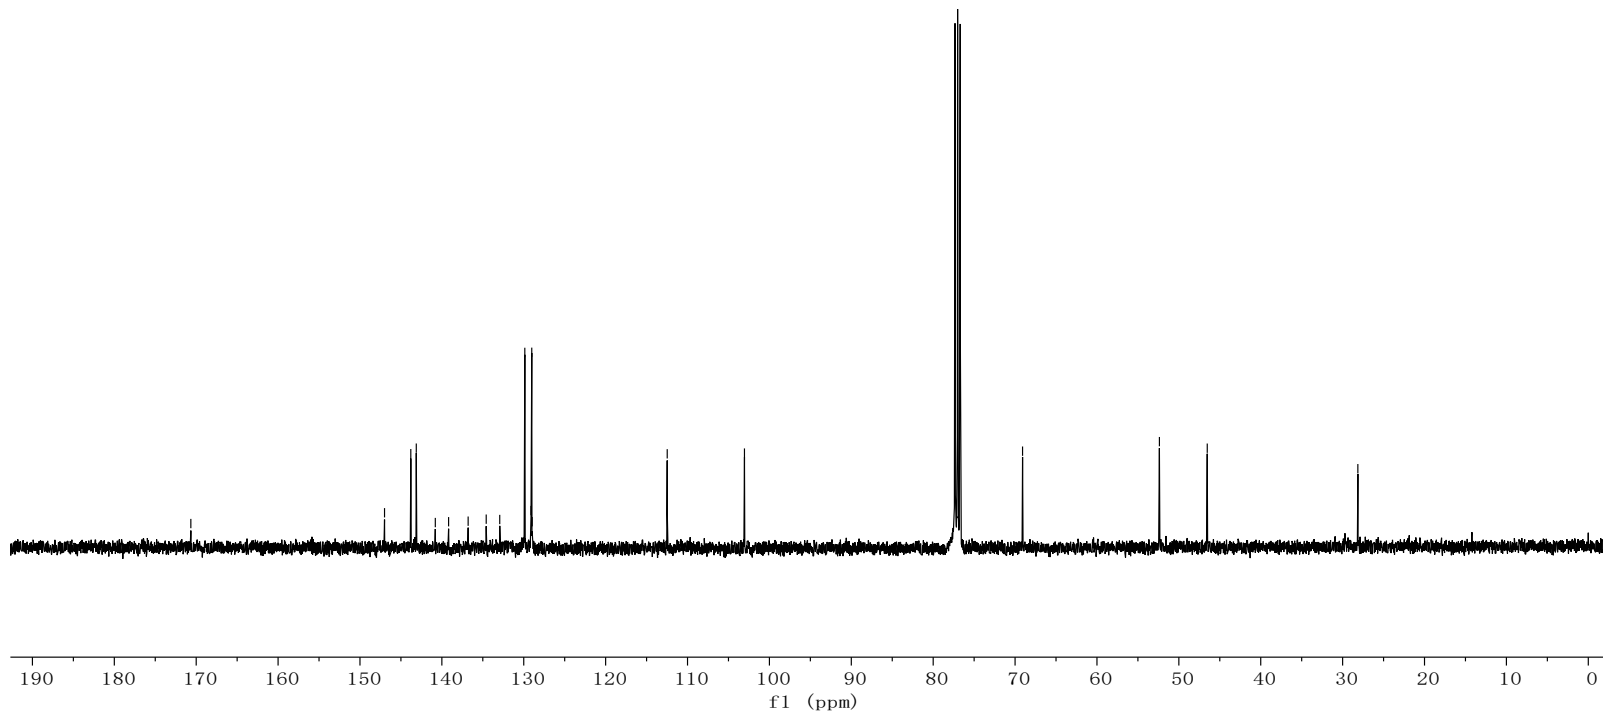

C-Br[D]-1.1.fid

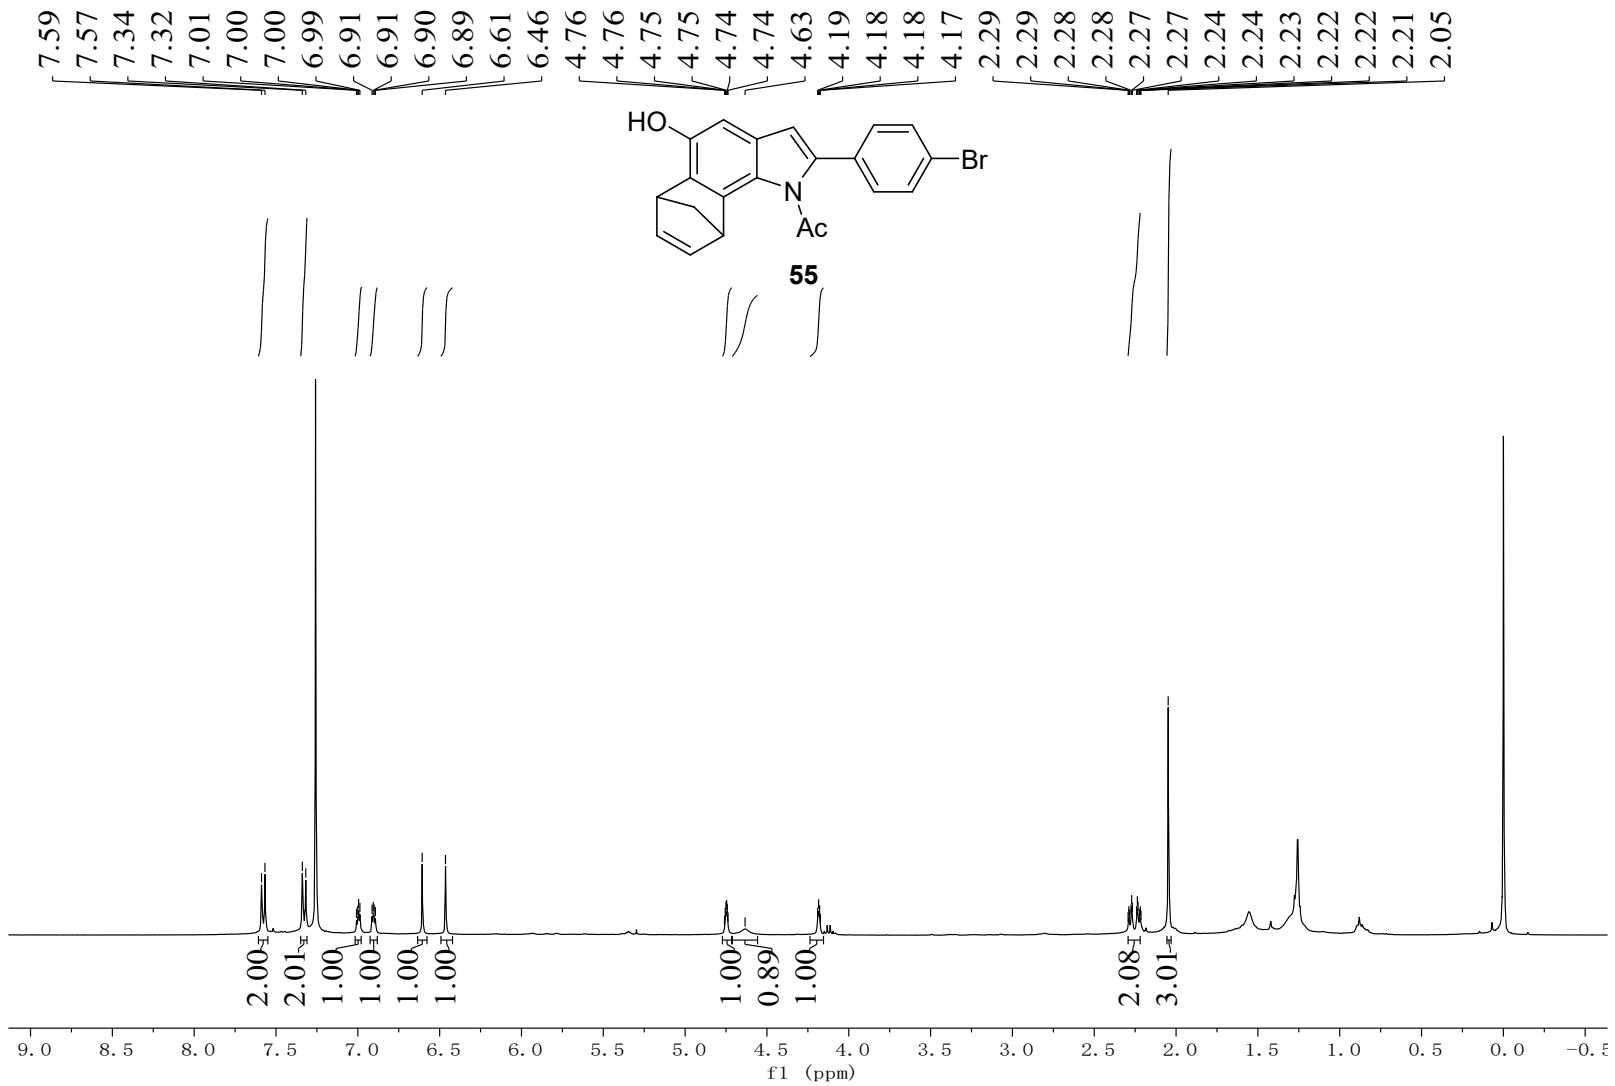

C-Br[D]-C-1.1. fid

— 170.63  
147.01  
143.80  
143.12  
140.81  
136.82  
133.40  
131.97  
130.19  
130.12  
129.12  
122.70  
— 112.50  
— 103.06  
— 69.09  
— 52.37  
— 46.54  
— 28.17

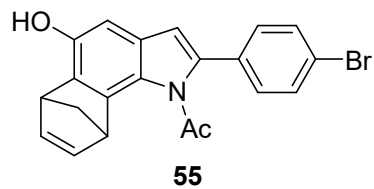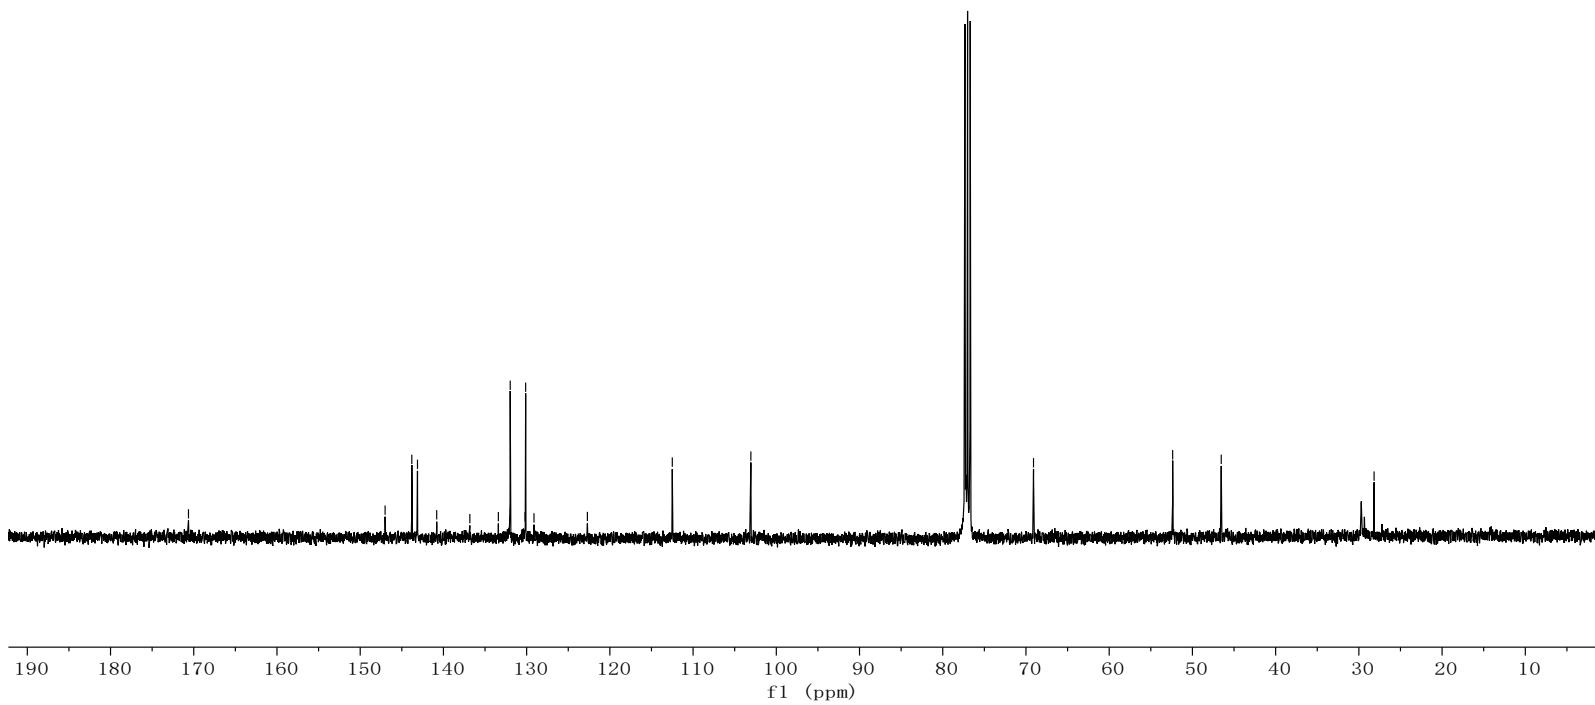

C-W[D]. 1. fid

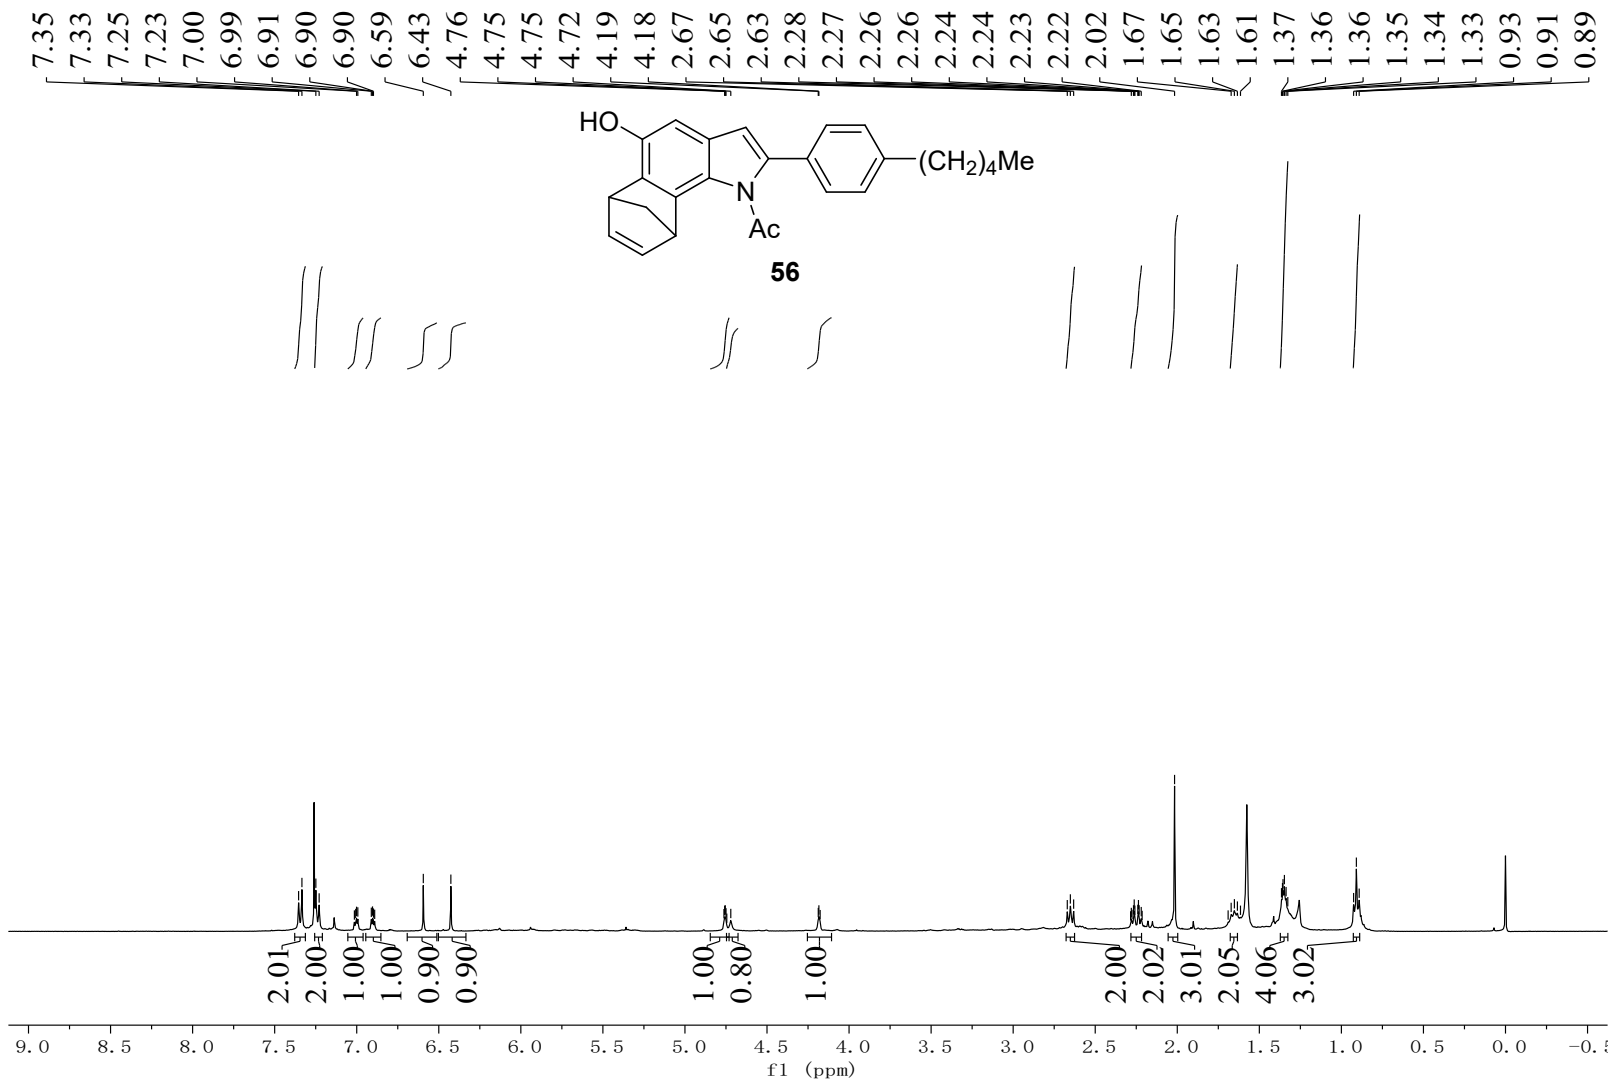



C-W[D]-C. 1. fid

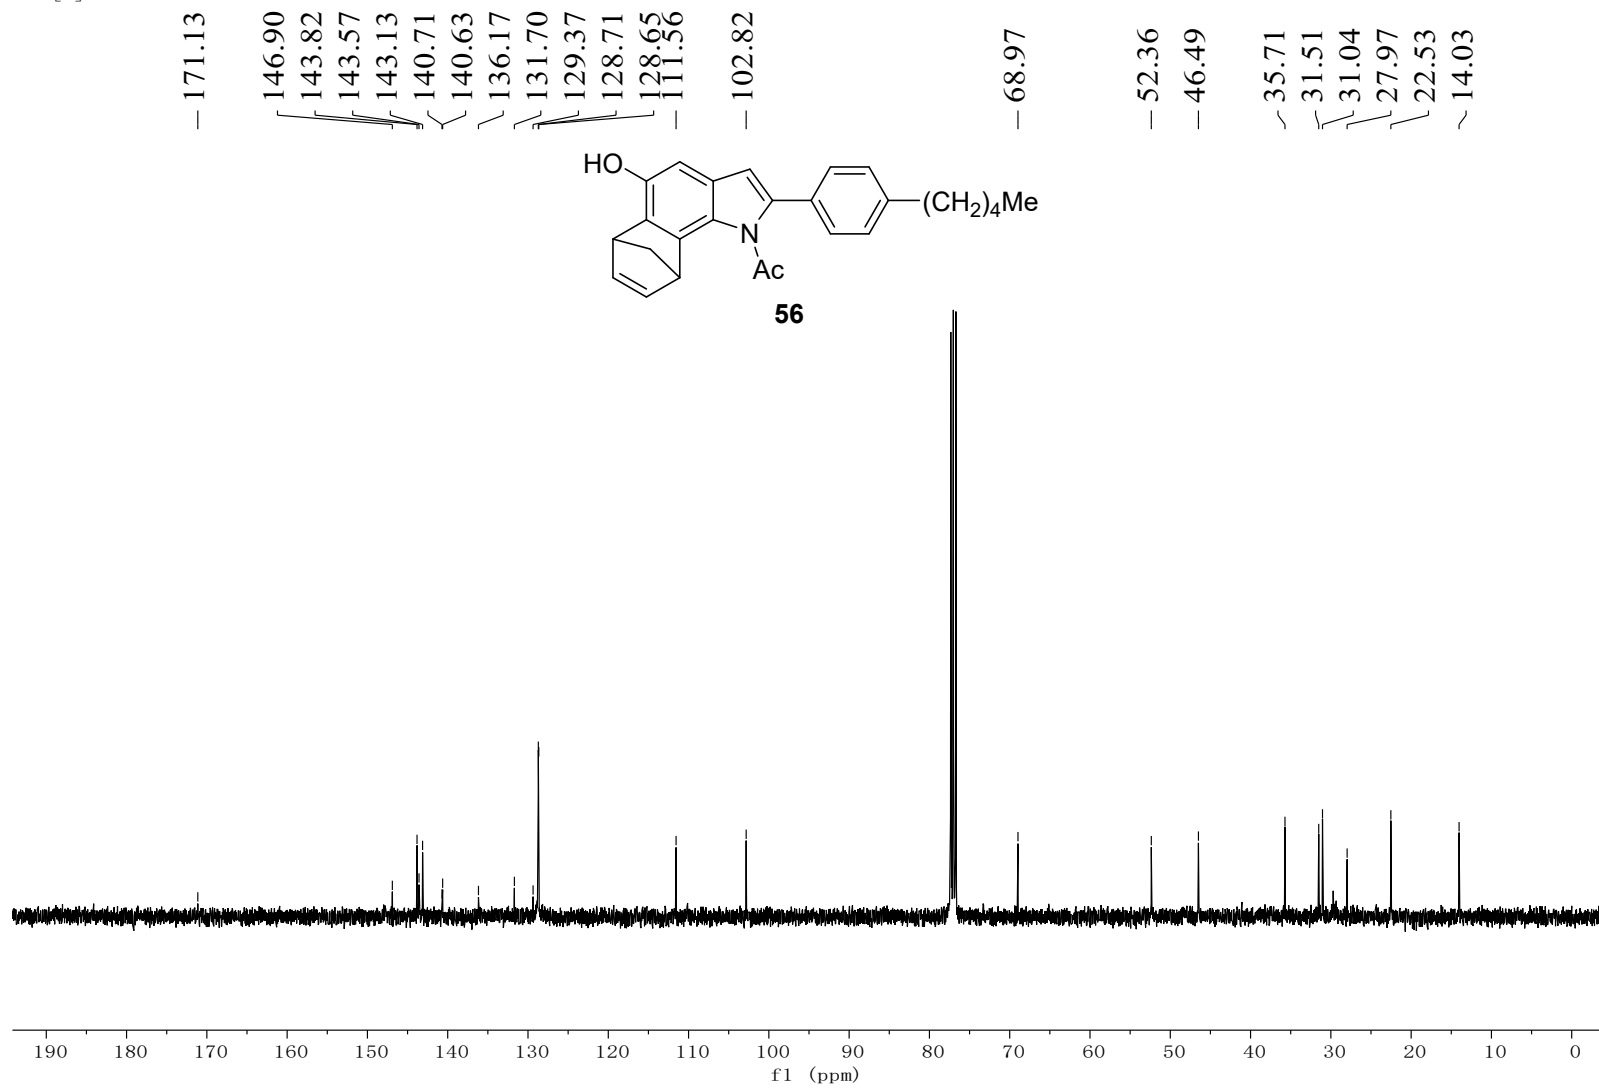

C-OMe[D]. 1. fid

7.37  
7.35  
7.02  
7.01  
7.00  
6.99  
6.98  
6.95  
6.91  
6.91  
6.90  
6.89  
6.59  
6.40  
4.75  
4.75  
4.74  
4.73  
4.73  
4.65  
4.19  
4.18  
4.18  
4.18  
4.17  
3.86  
2.28  
2.28  
2.27  
2.26  
2.26  
2.23  
2.23  
2.22  
2.22  
2.20  
2.02

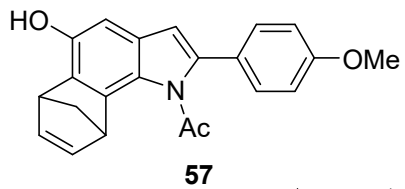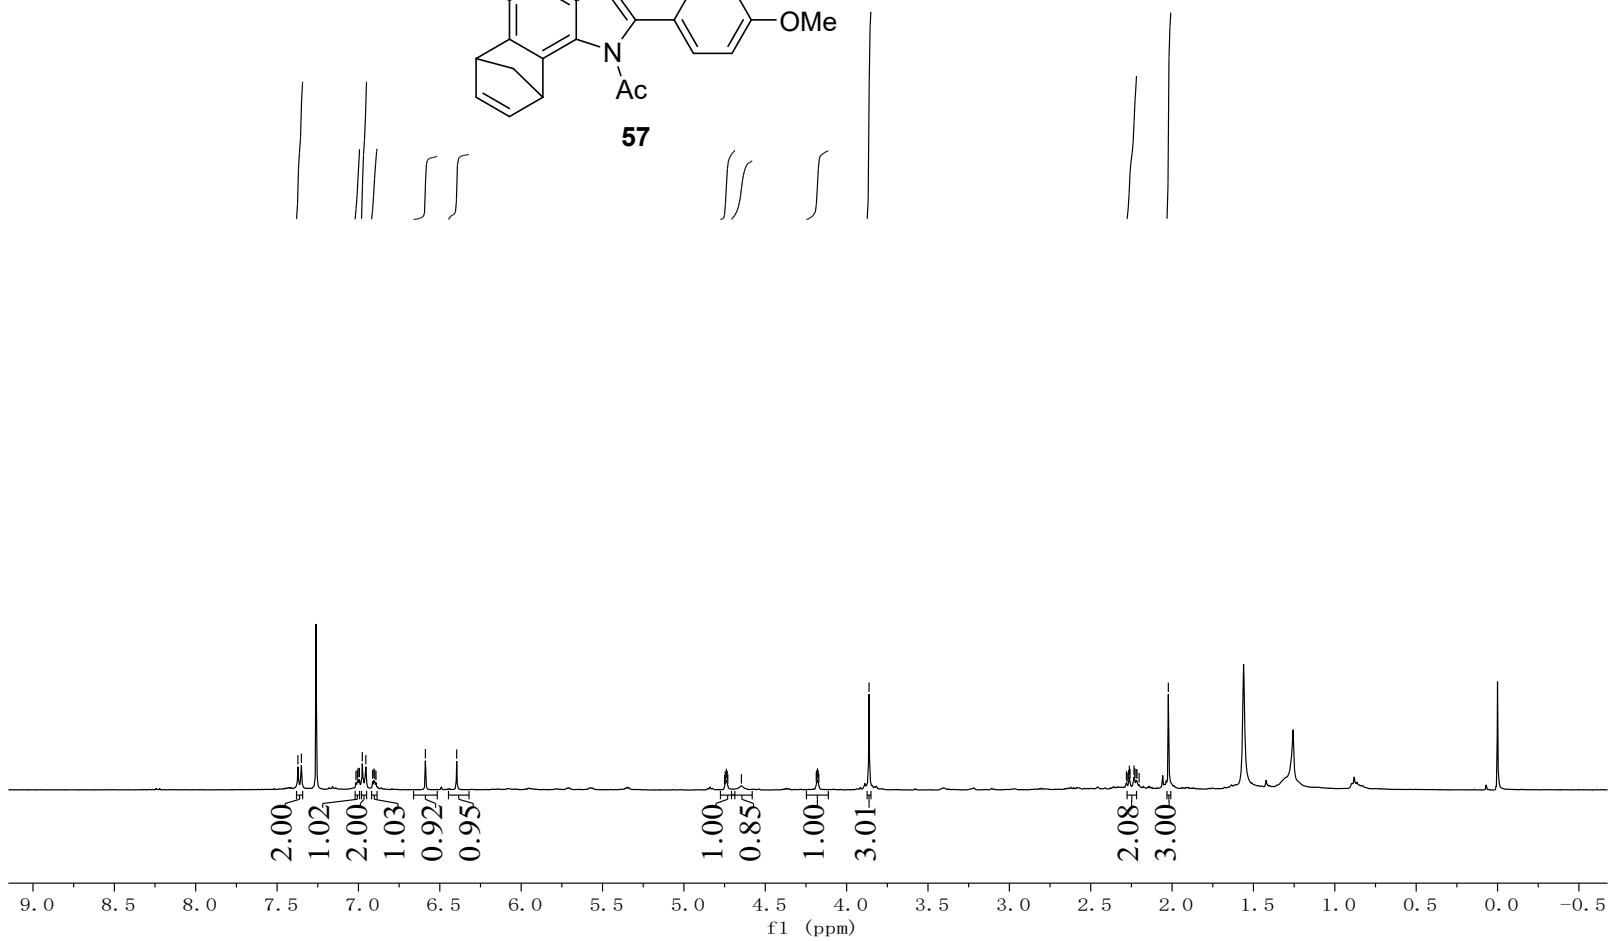

C-4OMe[D]-C. 1. fid

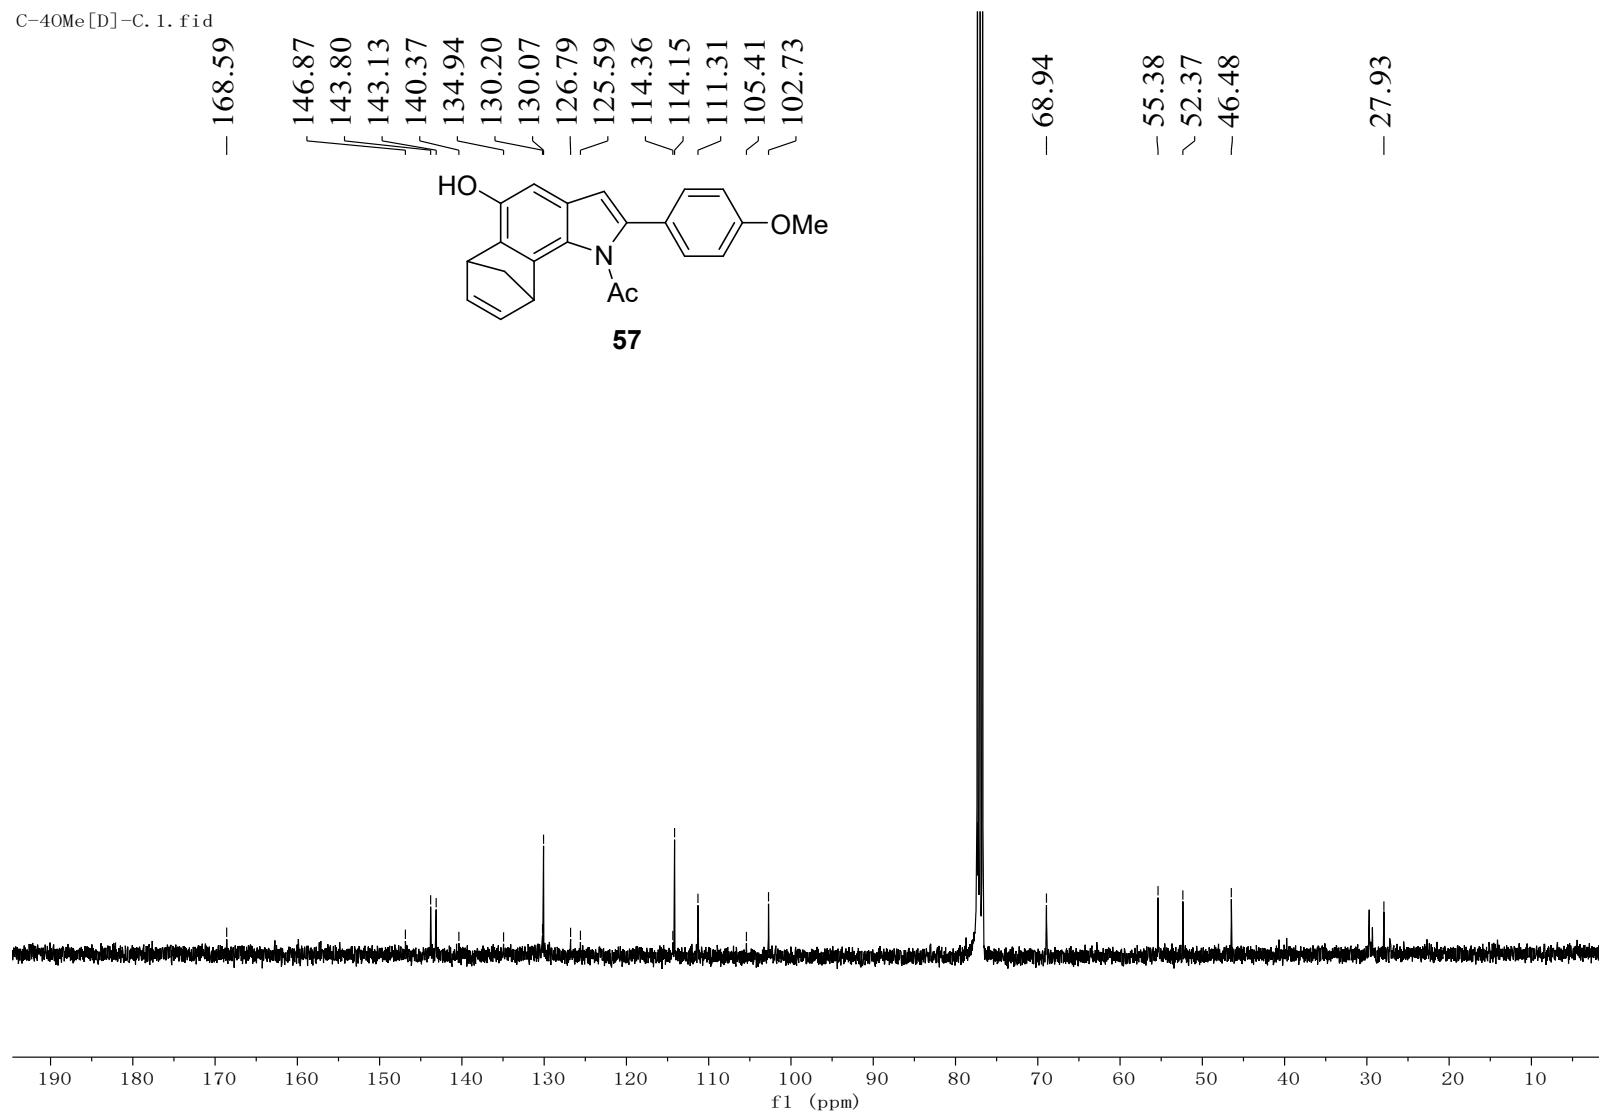

C-nBu-[D]. 1. fid

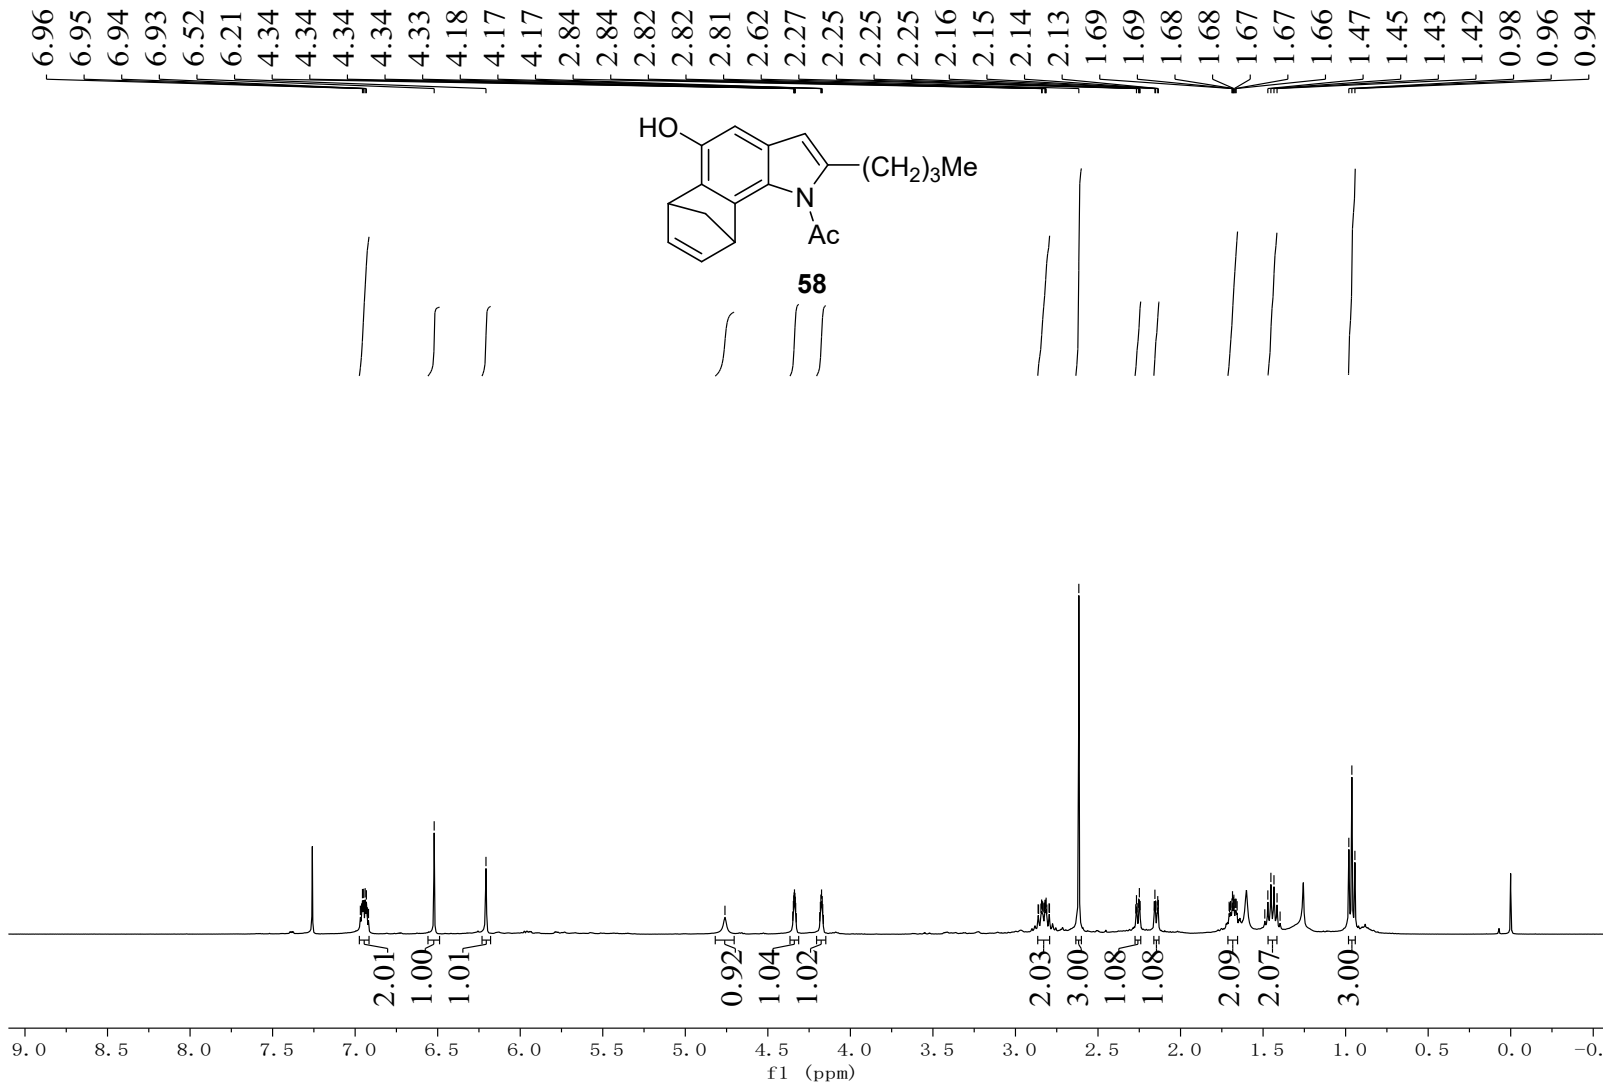

C-nBu-[D]-C. 1. fid

- 170.81
- 146.65
- 144.01
- 142.11
- 141.71
- 139.40
- 134.37
- 129.65
- 127.93
- 107.46
- 102.29
- 69.16
- 51.70
- 46.40
- ~ 31.06
- ~ 29.61
- ~ 27.03
- ~ 22.54
- ~ 13.93

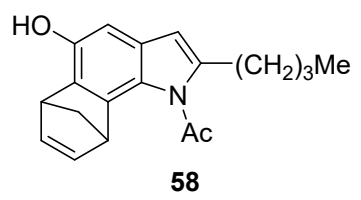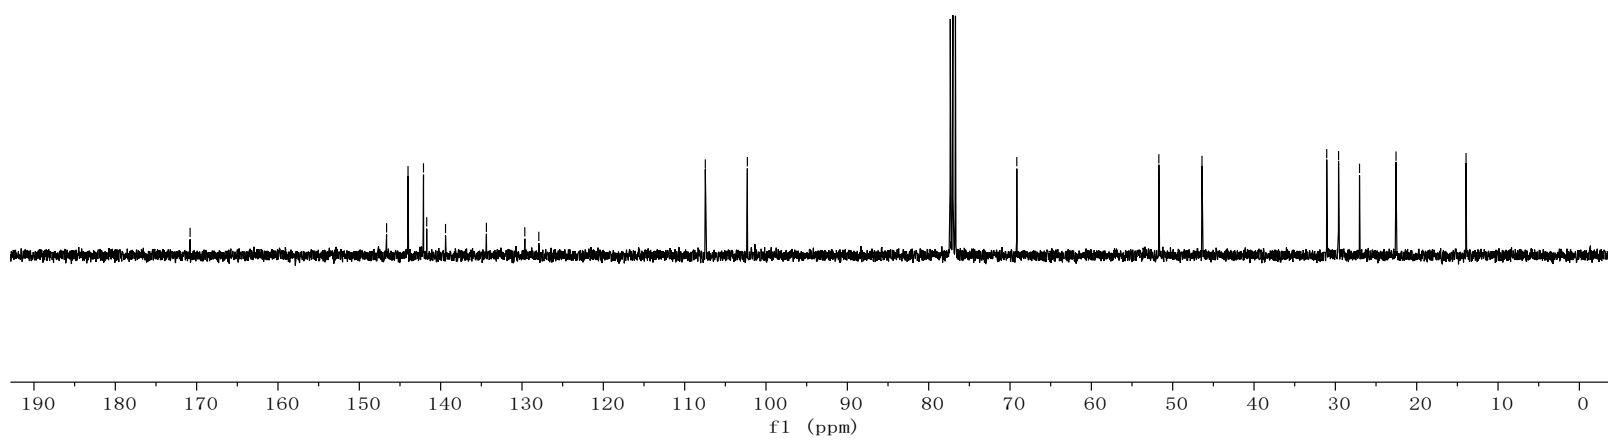

C-C12[D]. 1. fid

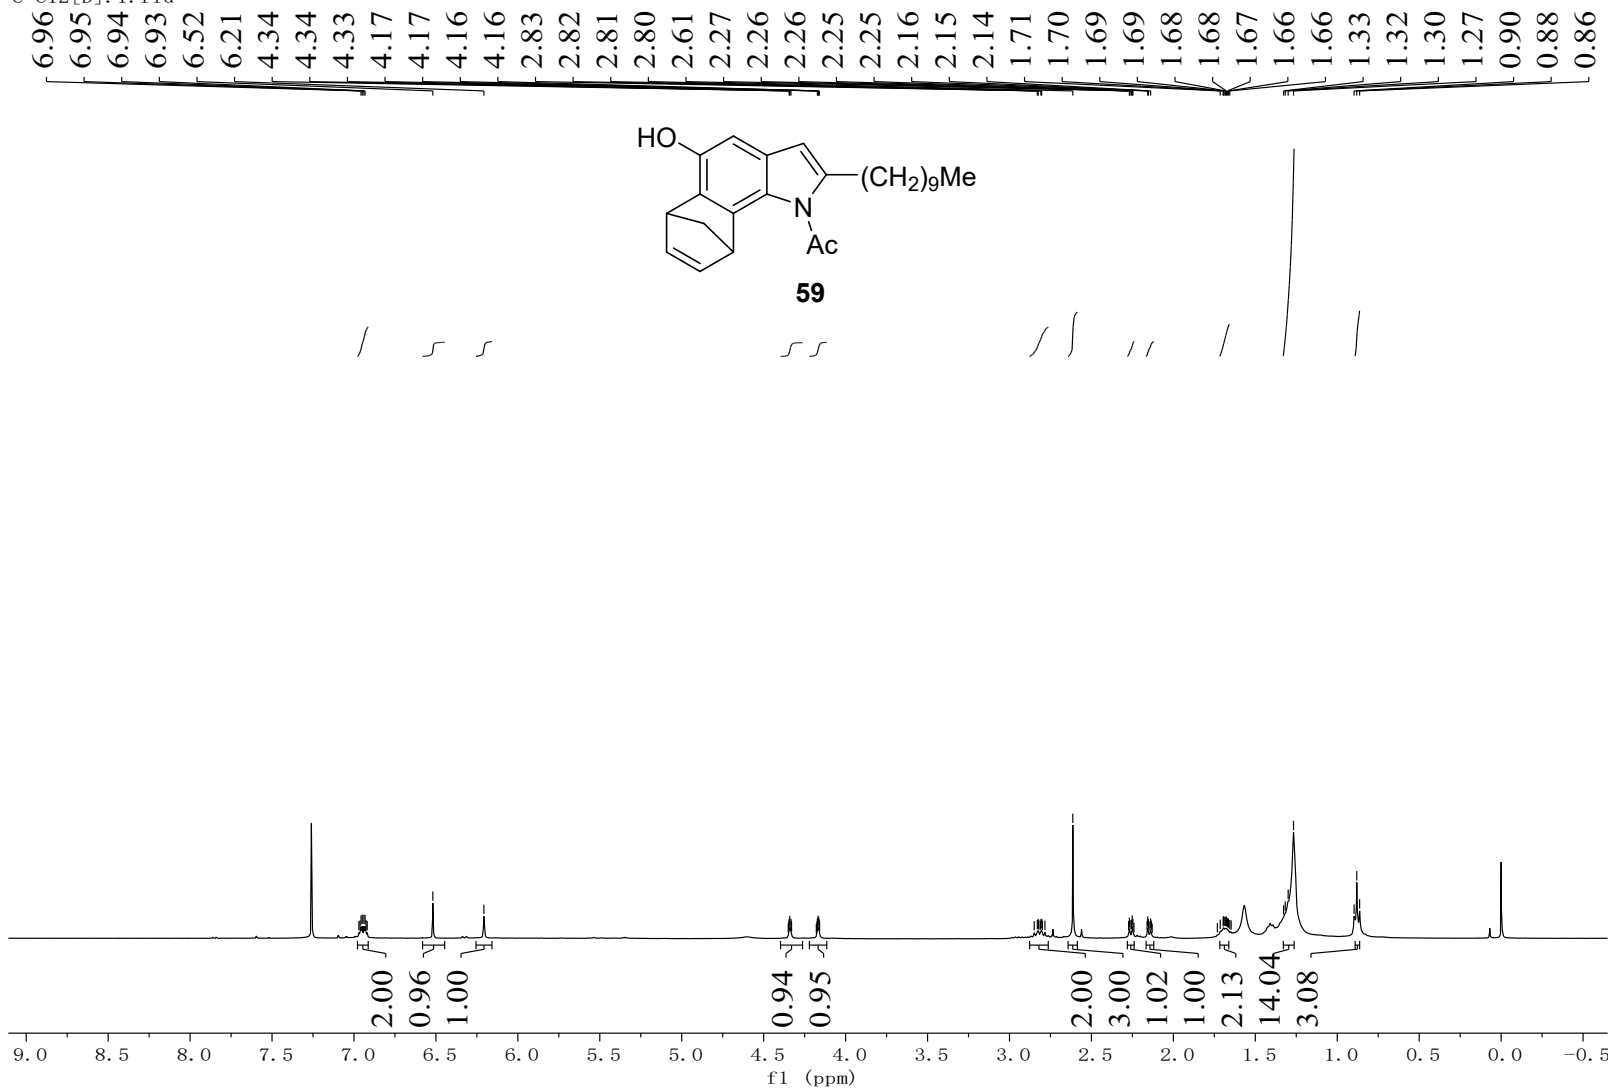

C-C12[D]-C. 1. fid

— 170.75  
— 149.69  
— 149.02  
— 146.62  
— 146.59  
— 143.98  
— 142.15  
— 141.77  
— 129.66  
— 127.95

— 107.42  
— 102.26

— 69.15

— 51.70  
— 46.38  
— 31.90  
— 29.91  
— 29.60  
— 29.58  
— 29.48  
— 29.32  
— 28.96  
— 27.03  
— 22.68  
— 14.11

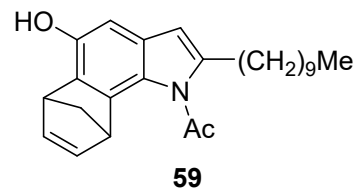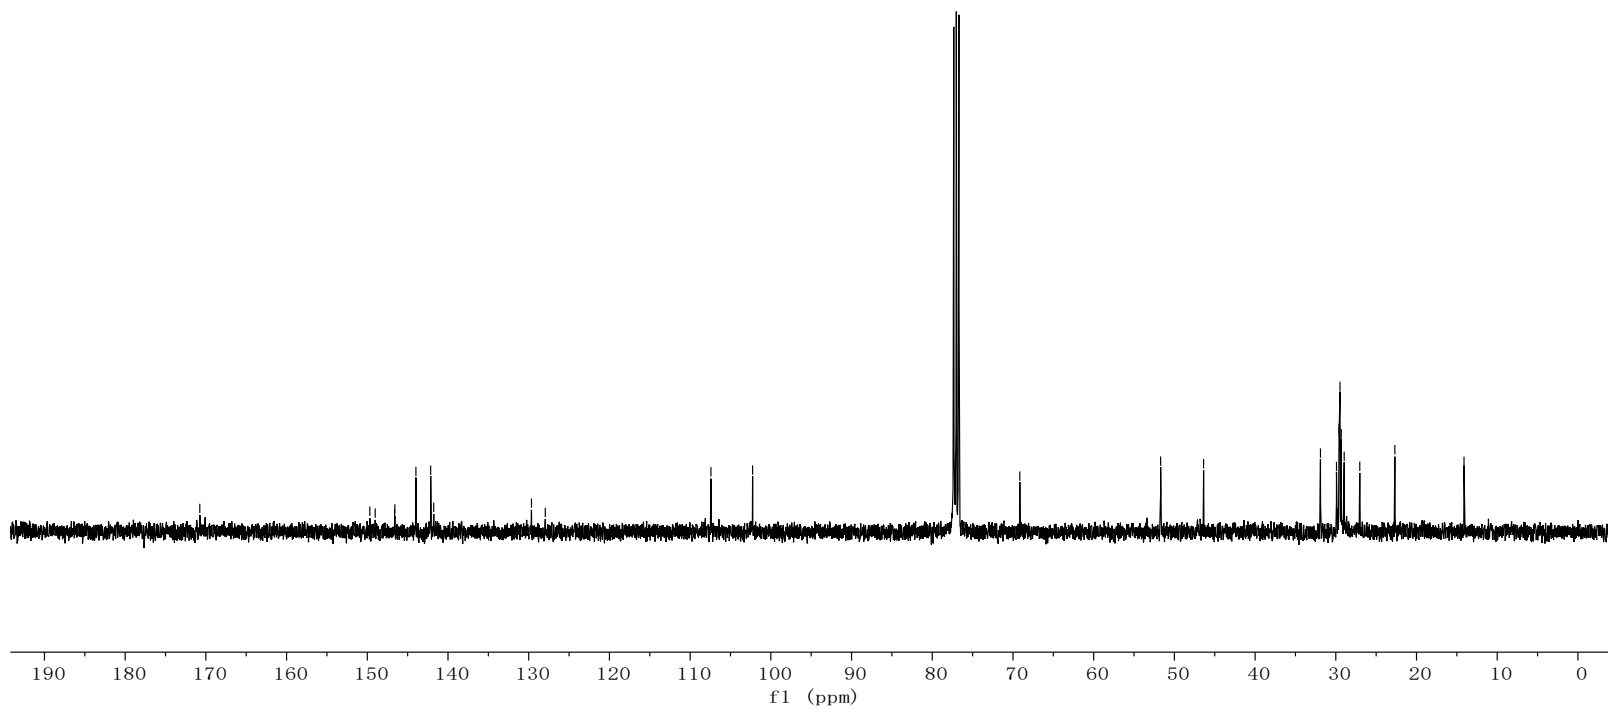

C-tBu[D]. 1. fid

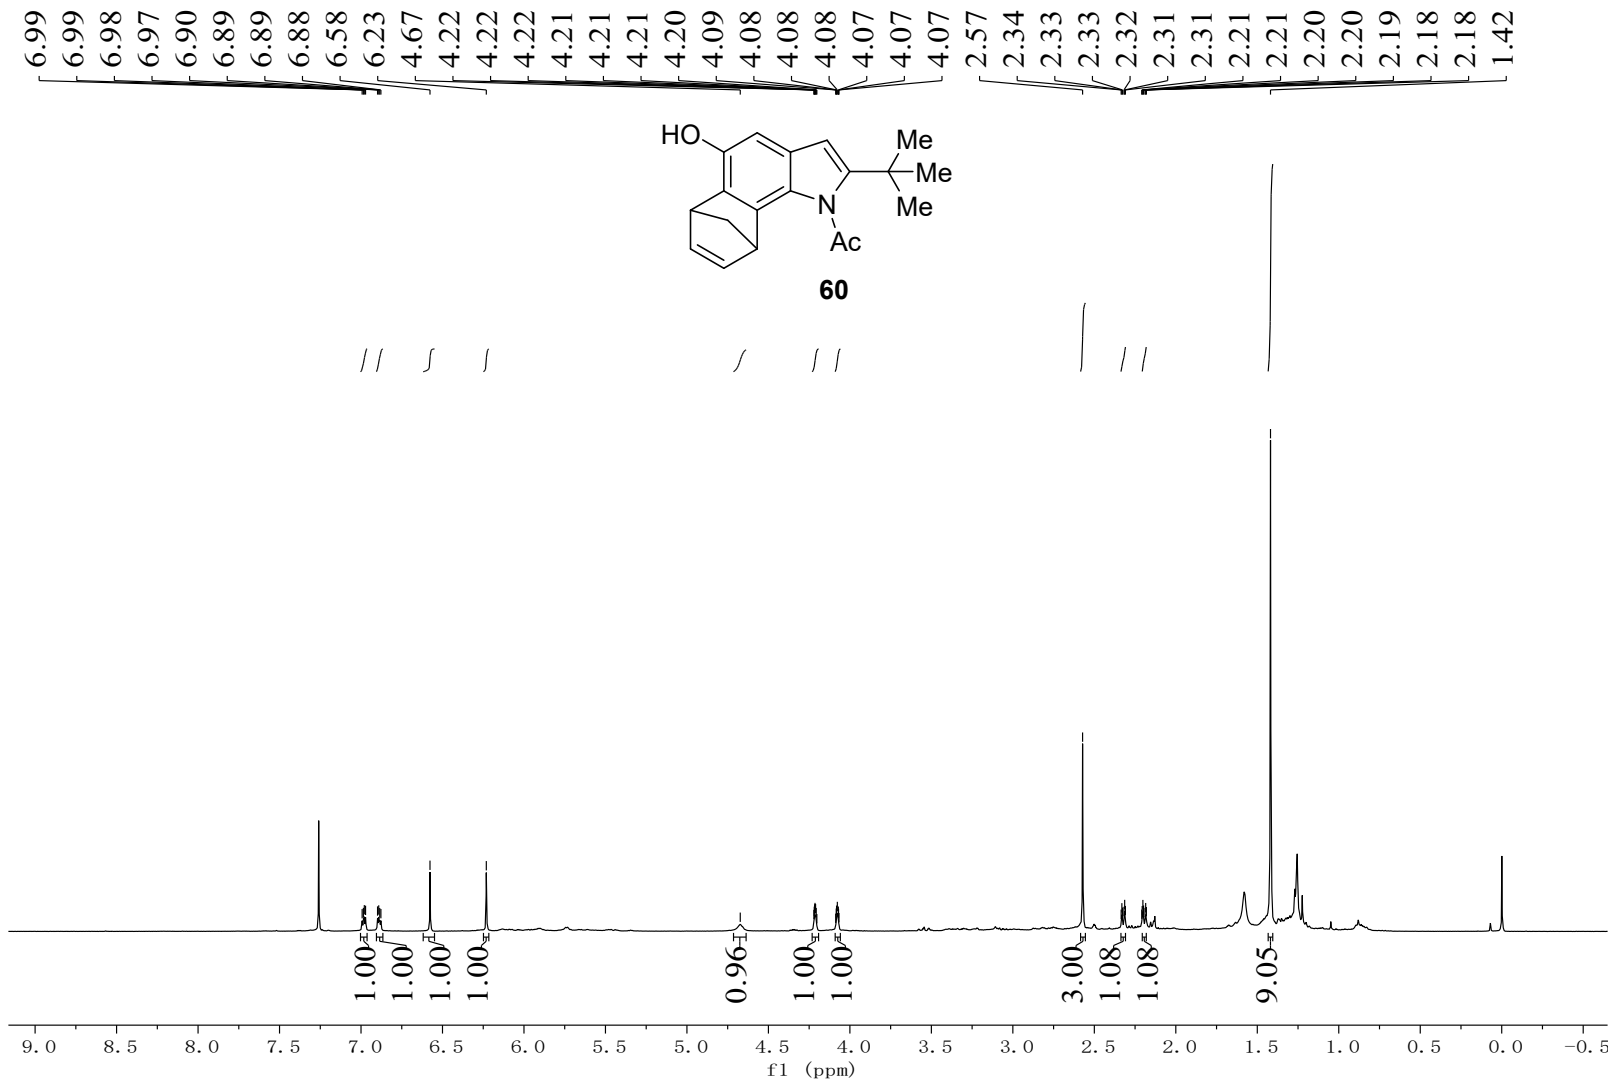



C-tBu[D]-C. 1. fid

- 176.45

151.01  
146.06  
144.96  
140.61  
140.55  
136.84  
133.55  
128.62

103.36  
102.37

- 70.78

50.12  
46.56

33.50  
30.12  
29.00

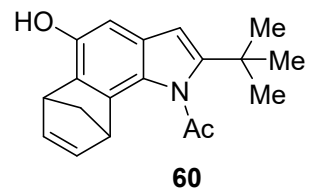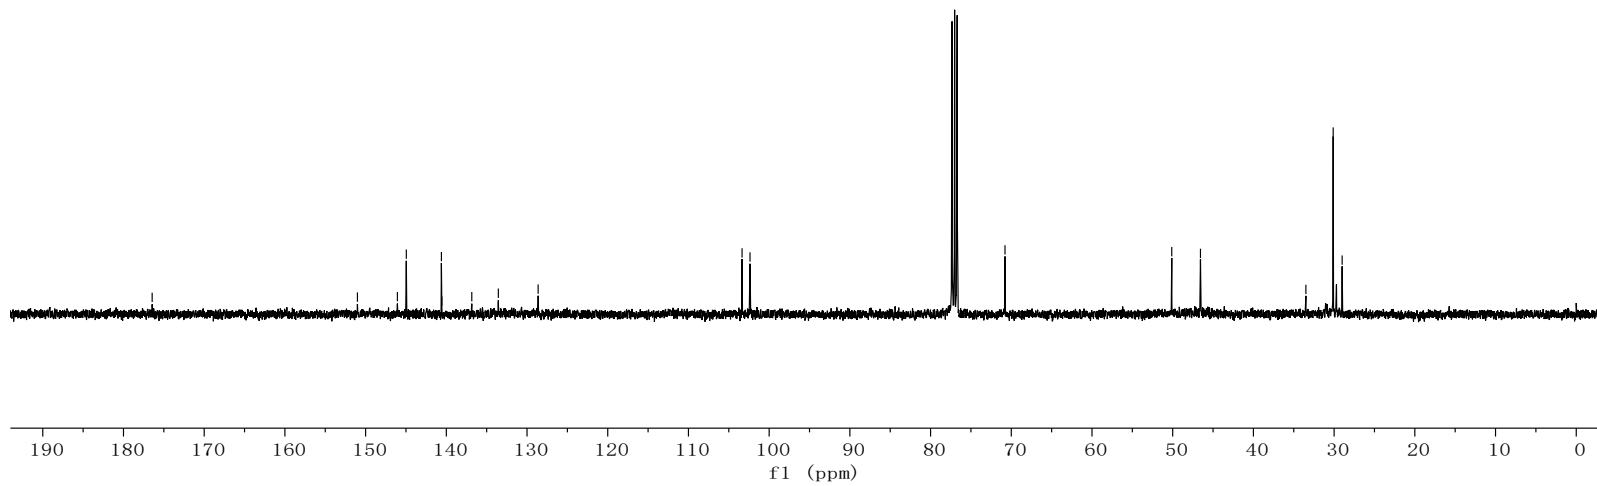

C-OTf[1]. 1. fid

<sup>1</sup>H

8.35  
7.49  
7.48  
7.48  
7.47  
7.46  
7.45  
7.45  
7.44  
6.61  
6.05  
6.03  
6.02  
6.02  
6.01  
6.01  
6.00  
5.99  
5.99  
5.98  
5.97  
5.97  
5.96  
5.95  
5.18  
5.18  
5.18  
5.16  
5.15  
5.15  
5.14  
5.14  
5.14  
3.60  
3.59  
2.05

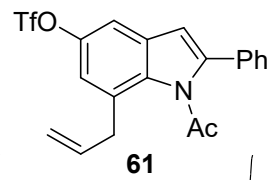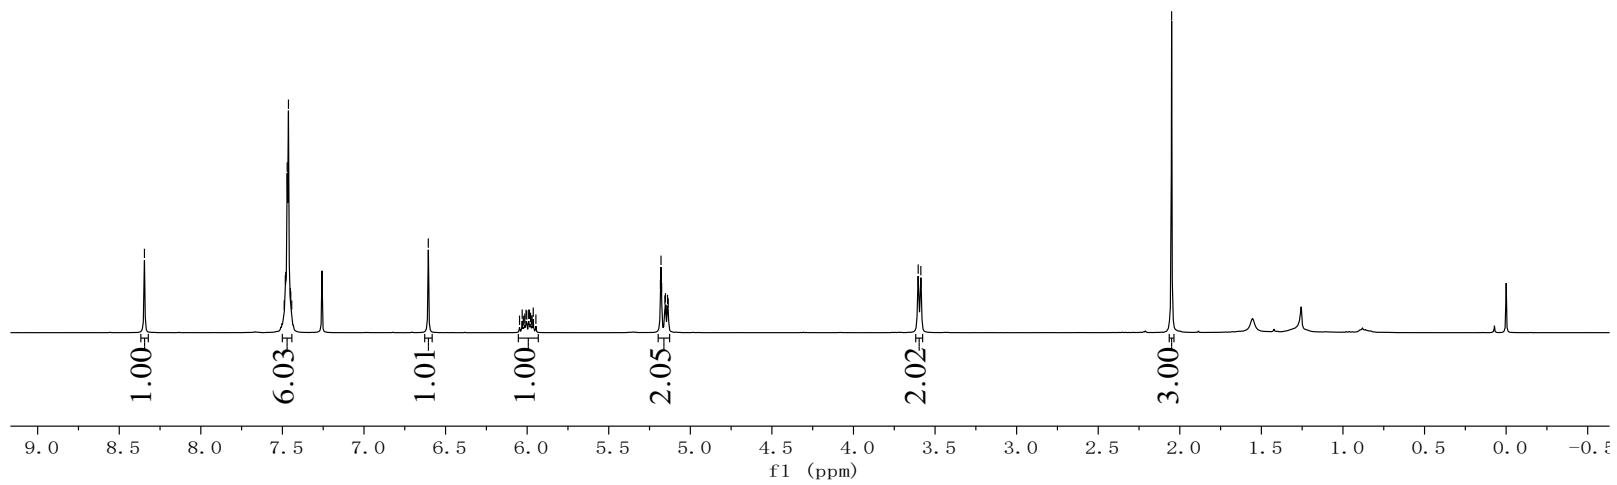

C-OTf-C. 1. fid

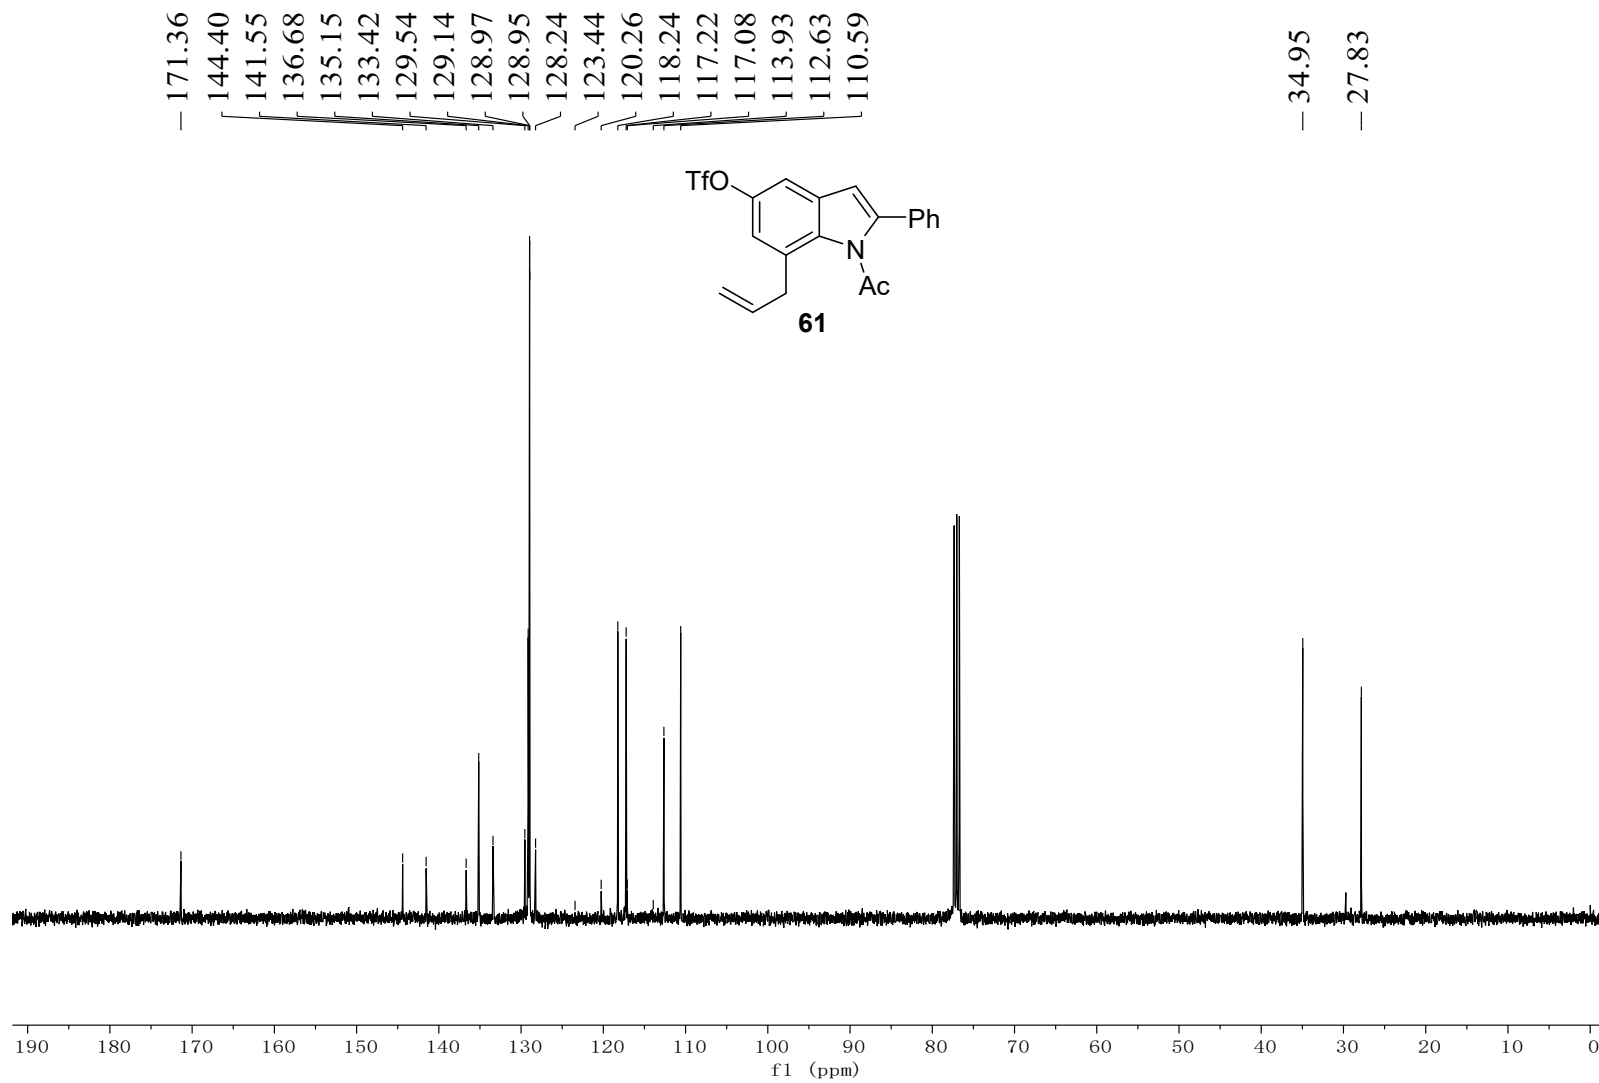

C-OTfB-2.1.fid

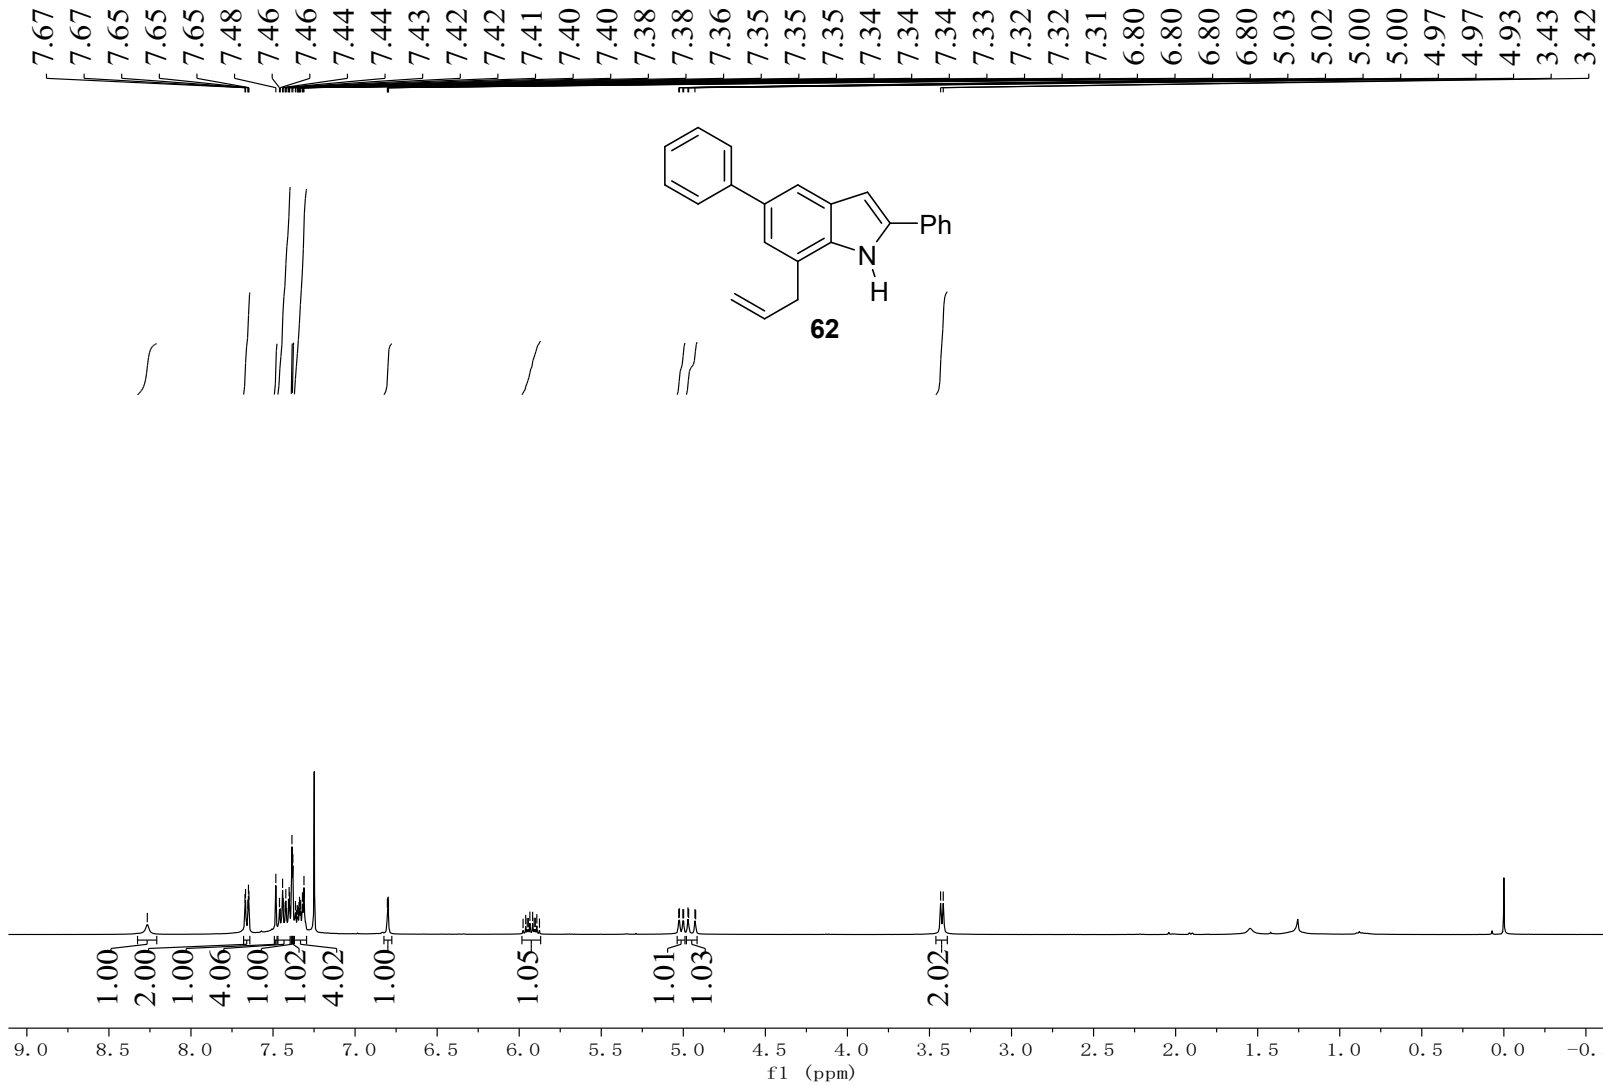

C-0TfB-2-C. 1. fid

142.77  
138.34  
138.26  
136.67  
135.23  
132.46  
132.23  
129.85  
129.05  
127.86  
127.72  
127.68  
126.42  
125.10  
121.76  
115.46  
111.27  
— 99.86

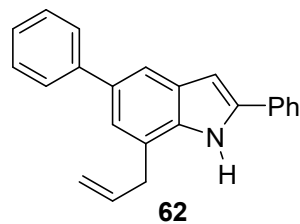

— 38.07

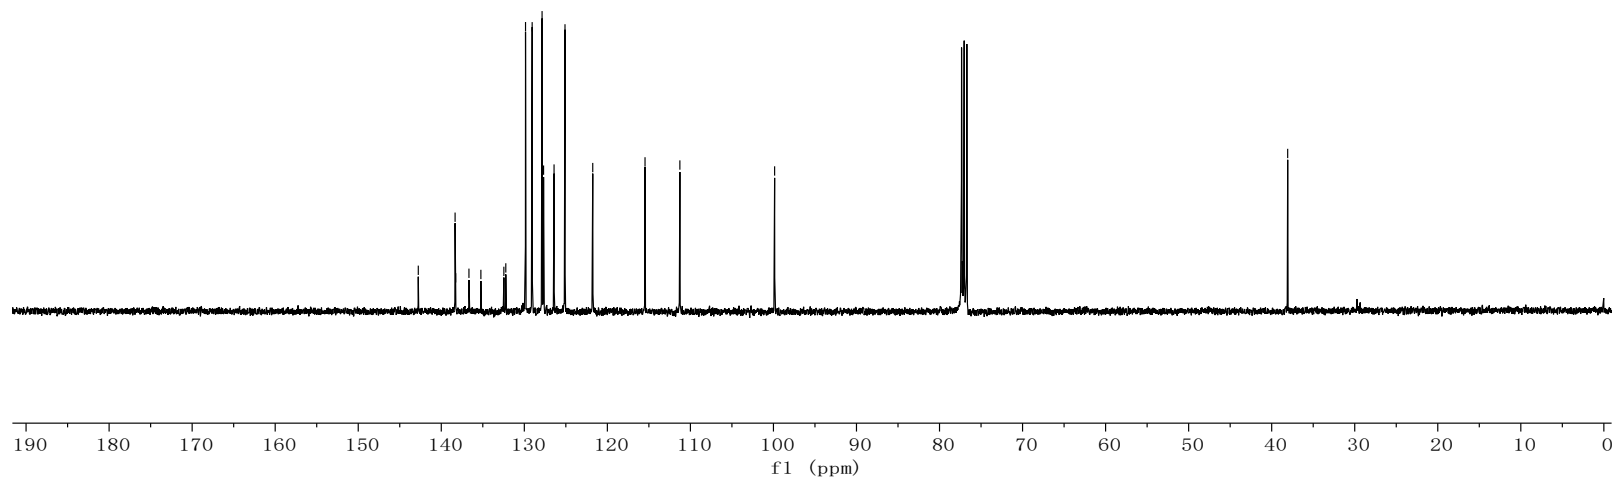

C-OTf-T.1. fid

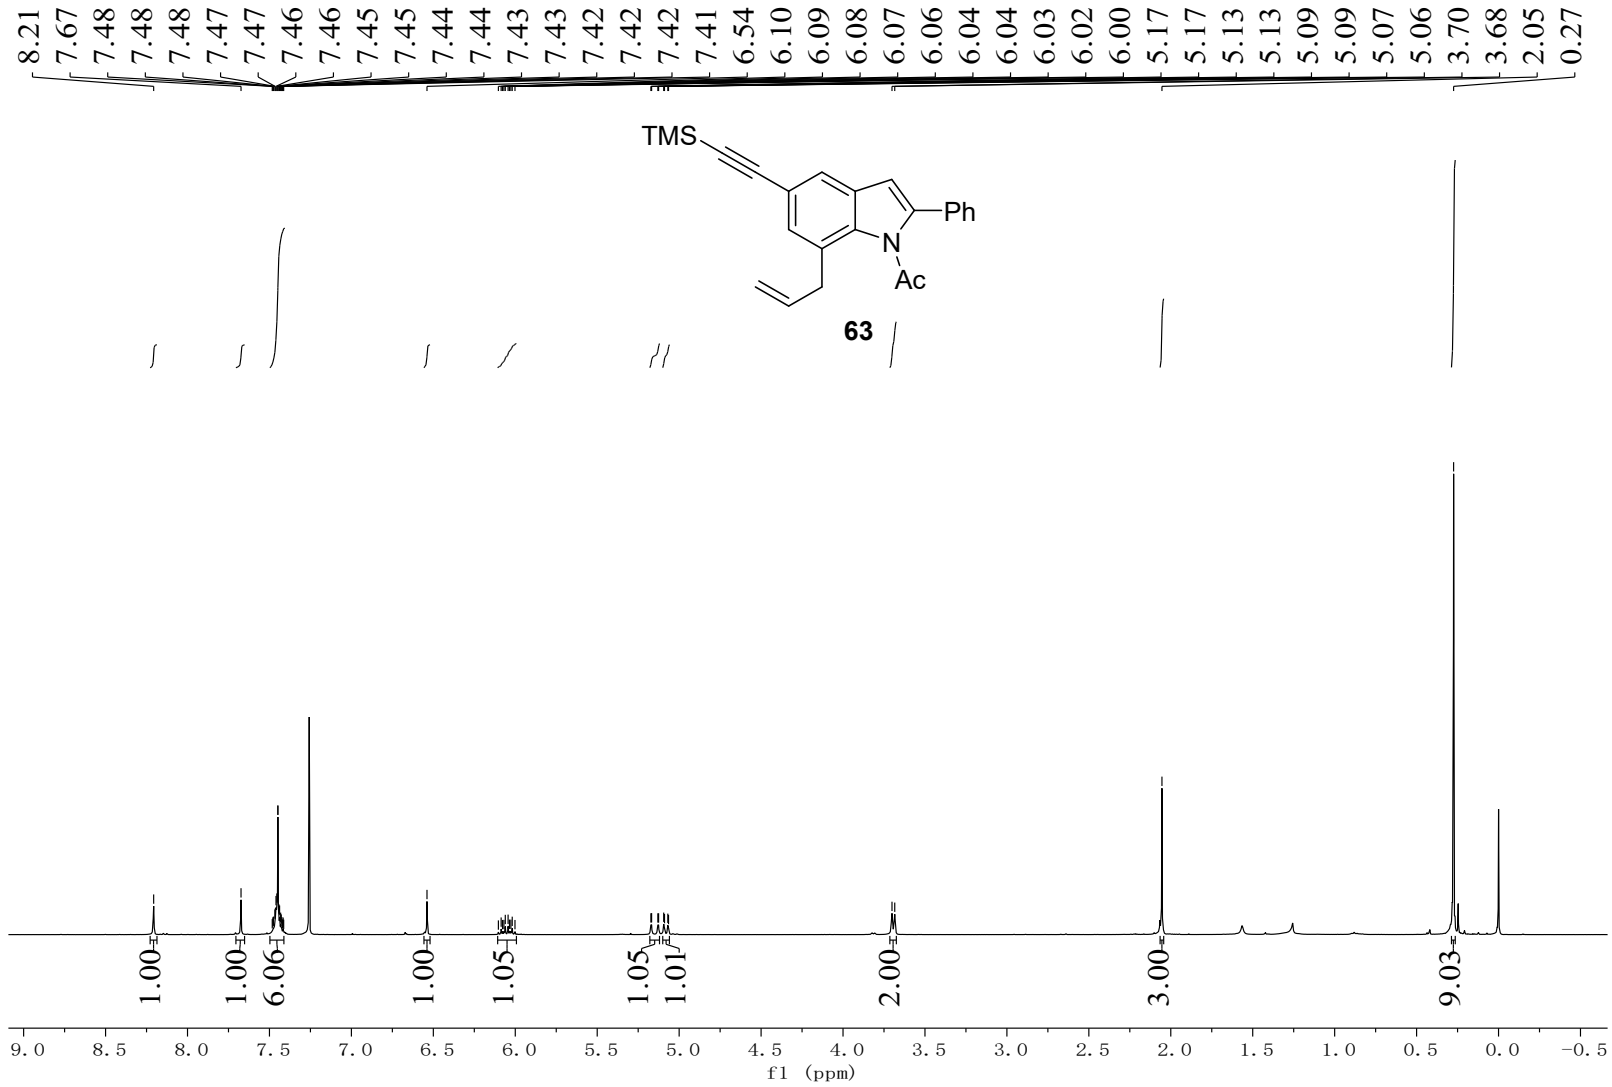

C-OTf-T-C. 1. fid

— 171.43

140.22  
139.81  
137.86  
136.94  
133.90  
128.89  
128.80  
128.72  
127.16  
124.61  
118.27  
116.06  
115.84  
110.99  
104.38  
96.91

— 39.49

— 27.93

— 0.09

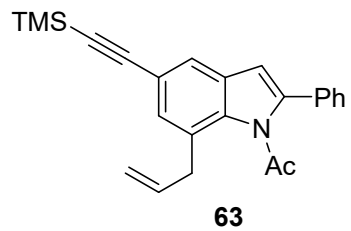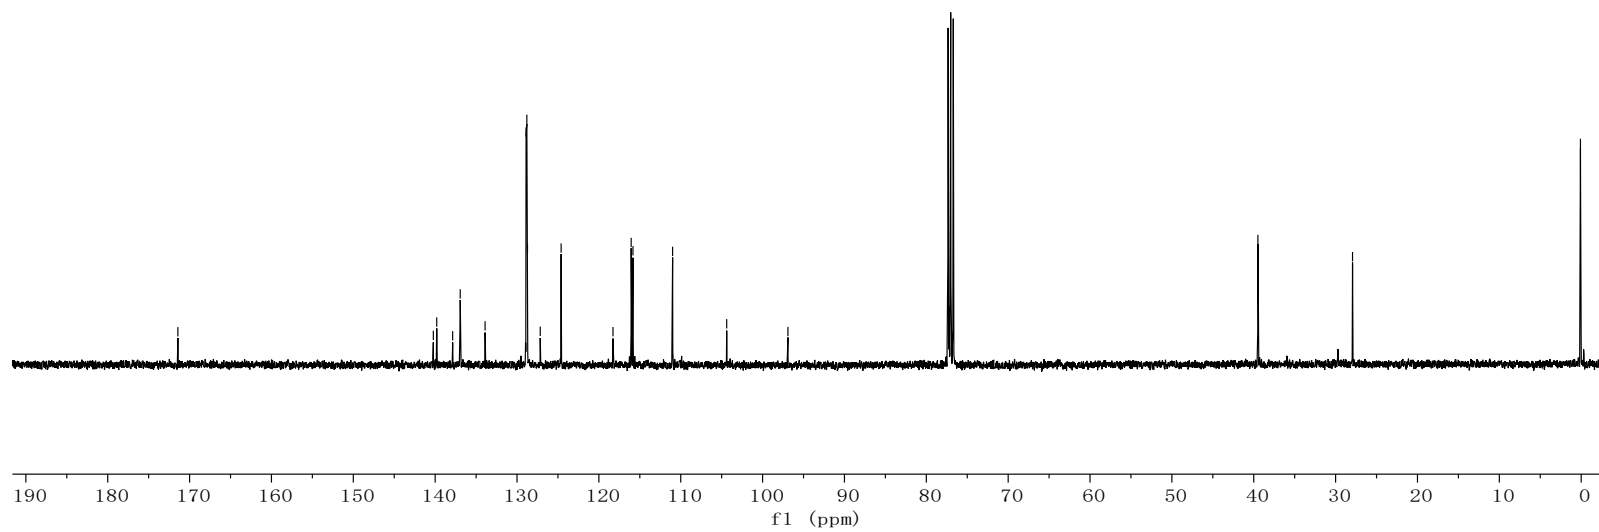

Supplement: d2cc01766k1.pdf [file d2cc01766k1.pdf]
